# Supplementary material for: IGF2 Mediates Resistance to Isoform-Selective-Inhibitors of the PI3K in HPV Positive Head and Neck Cancer
Source: MDPI journal article supplement (doi:10.3390/cancers13092250), 2021-05-07

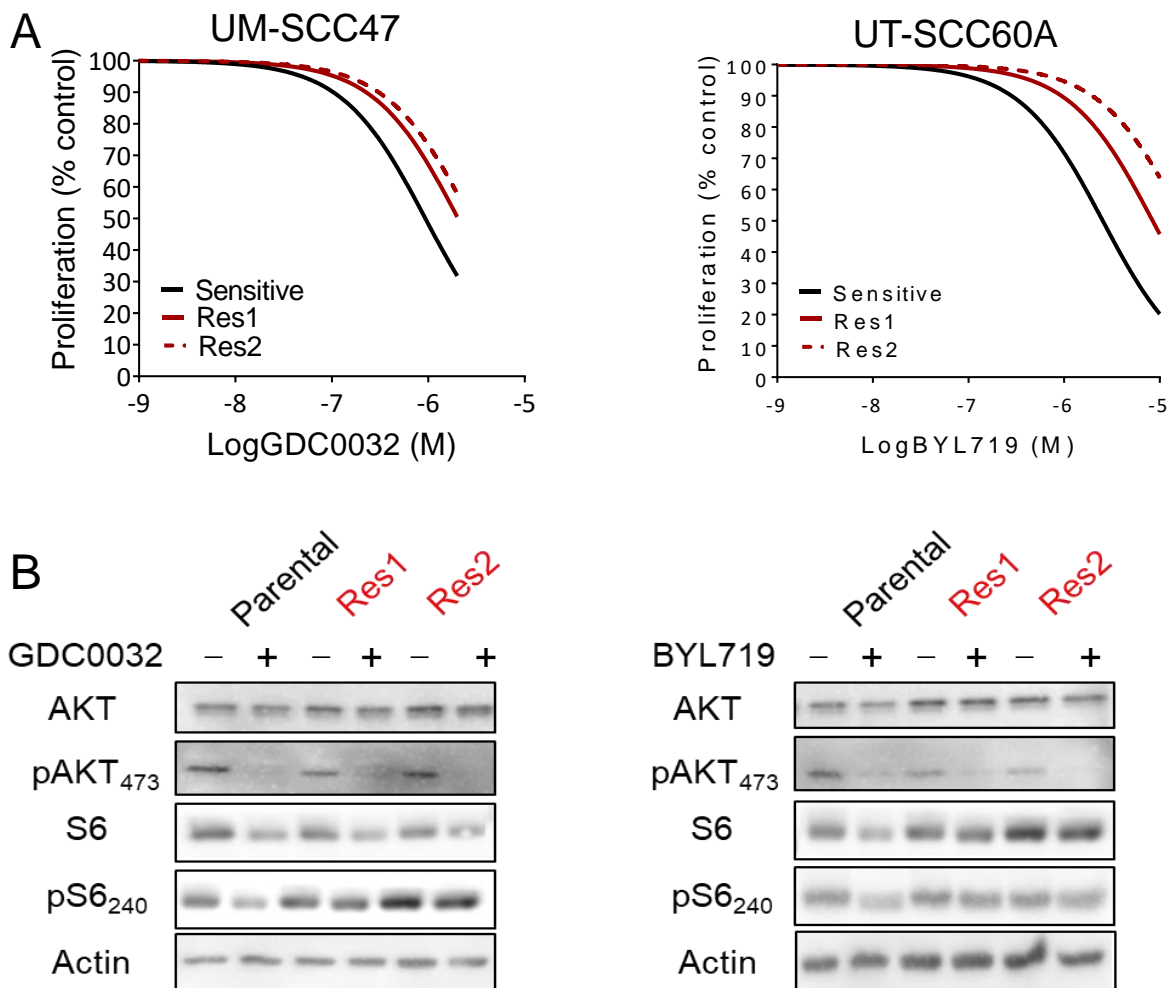

Figure S1: Characterization of UM-SCC47 and UT-SCC60A sensitive and resistant cells. **(A)** Dose-response curve of UM-SCC47 and UT-SCC60A sensitive and resistant cell (res1 and res2) following 4-days of treatment with increasing concentration of GDC0032 (0-2  $\mu$ M) and BYL719 (0-10  $\mu$ M), respectively. **(B)** UM-SCC47 and UT-SCC60A sensitive and resistant cells treated for 24 h with DMSO, GDC0032 (500 nM) or BYL719 (2  $\mu$ M), respectively, after which cells were lysed. The indicated proteins and phosphorylated proteins were measured using western blot.

## UT-SCC60A

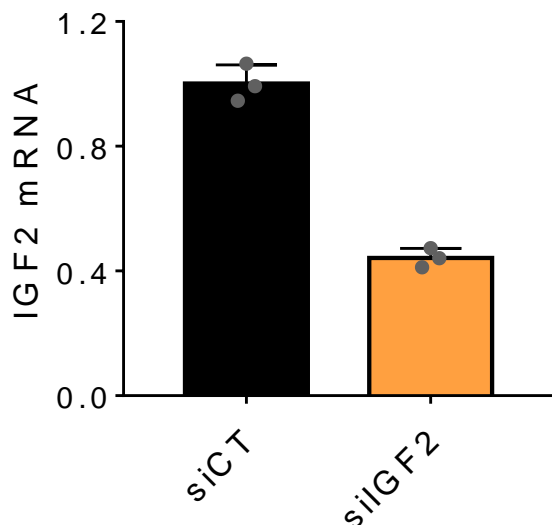

Figure S2: IGF2 silencing using siRNA. RT-PCR analysis measuring IGF2 mRNA levels in sensitive UT-SCC60A following siRNA transfection with scramble RNAi (siCT) or RNAi against IGF2 (siIGF2)

## UT-SCC60A

## UT-SCC60A Res2

## UM-SCC47 Res2

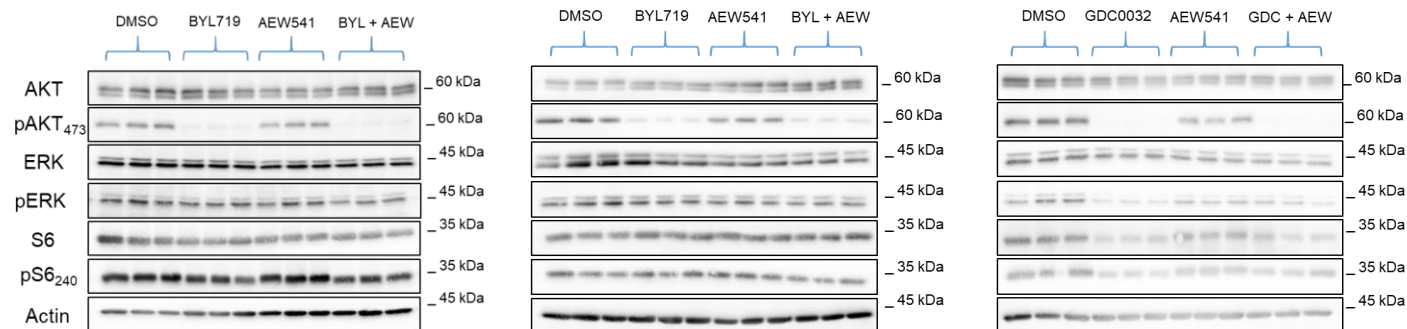

Figure S3: Characterizing of the cellular response of tumor cells to therapy combination. UT-SCC60A sensitive and resistant cells (Res2), and UM-SCC47 resistant cells (Res2) were treated for 4 h with DMSO, BYL719 (2 $\mu$ M) or GDC0032 (500 nM), AEW541 (1  $\mu$ M) and combination of both drugs, after which cells were lysed. The indicated proteins and phosphorylated proteins were probed using western blot.

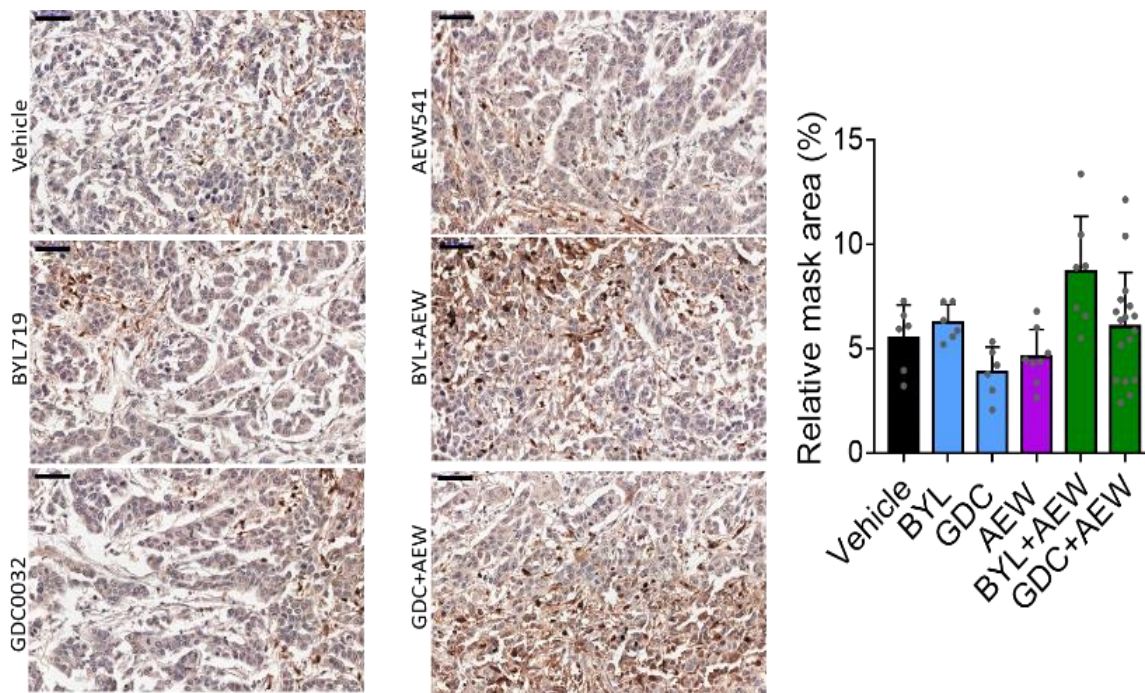

Figure S4: Cleaved Caspase3 staining. PDX<sup>HPV+</sup> was cultured for 24 h in the presents of DMSO, GDC0032 (500 nM) or BYL719 (2  $\mu$ M), AEW541 (1  $\mu$ M) and combinations of drugs as indicated, after which tissue was fixed and analyzed using immunohistochemistry. Representative images of immunohistochemistry staining of Cleaved-Caspase3 are presented with quantification. Scale bar: 50  $\mu$ m.

## CDX-UM-SCC47

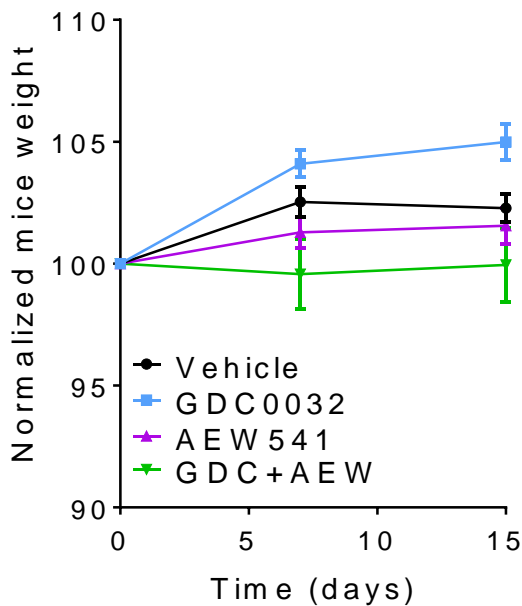

## PDX-7157

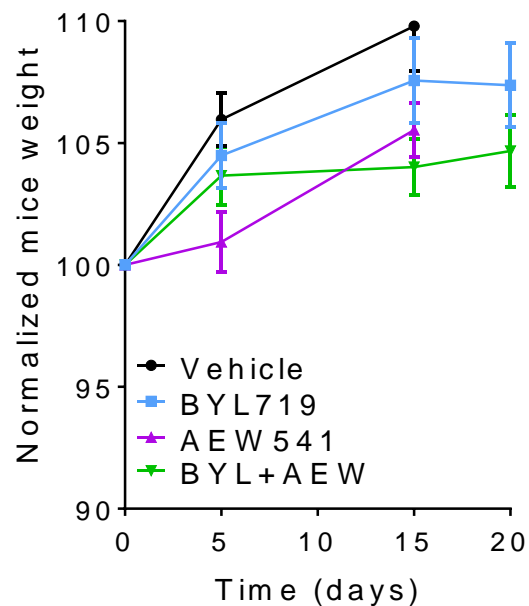

Figure S5: Toxicity of therapy in mice. The weight of NSG mice bearing CDX-UM-SCC47 and PDX-7157 treated as indicated. GDC0032 (10 mg/kg), BYL719 (25 mg/kg), AEW541 (30 mg/kg).

## TCGA samples

Expression of IGF2 in HNSC based on Sample types

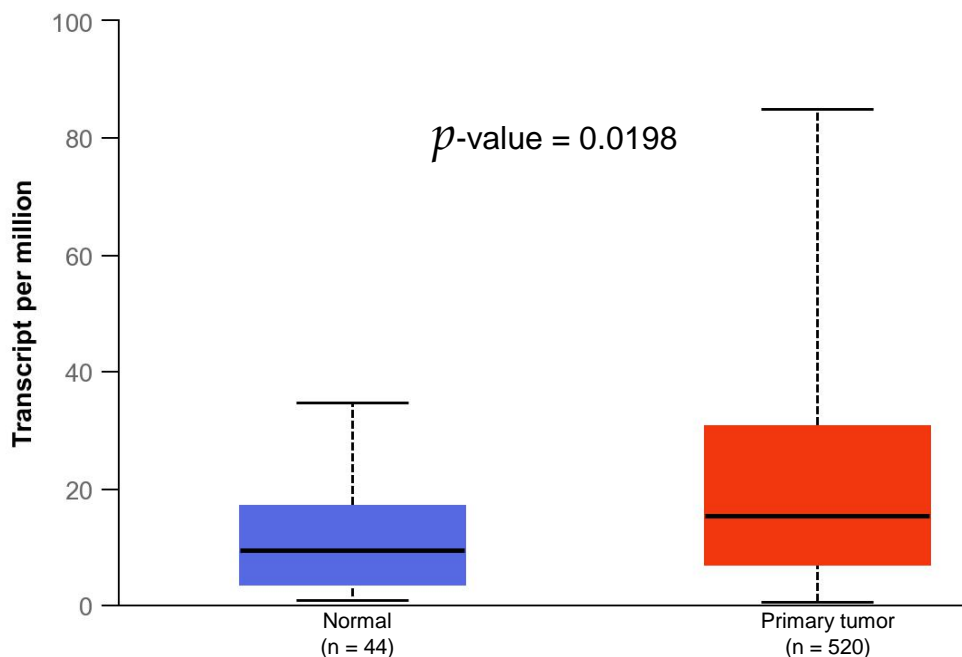

Figure S6: IGF2 expression in HNC patients. TCGA data showing IGF2 expression in HNC patients, compared to normal tissue. Data extracted from [HTTP://ulcan.path.uab.edu](http://ulcan.path.uab.edu)

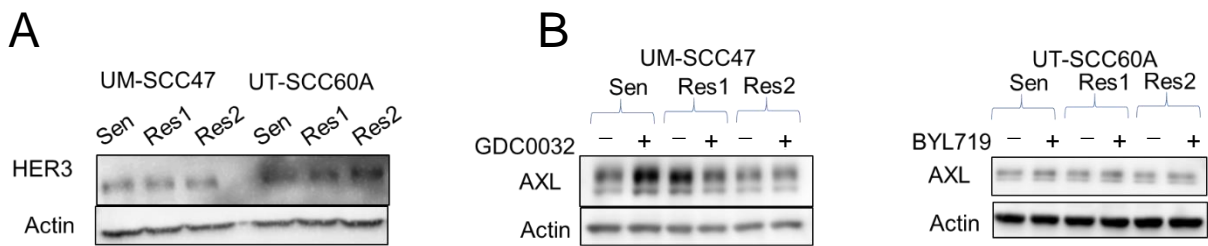

Figure S7: AXL and HER3 expression in sensitive and resistant cells. **(A)** Western blot analysis showing HER3 expression in UM-SCC47 and UT-SCC60A sensitive and resistant cells (Res1 and Res2). **(B)** UM-SCC47 and UT-SCC60A sensitive and resistant cells (Res1 and Res2) were treated with DMSO, GDC0032 (500 nM) or BYL719 (2 $\mu$ M) as indicated. The indicated proteins were measured using western blot.

Figure S8: Original Western Blot images.

Figure 5A

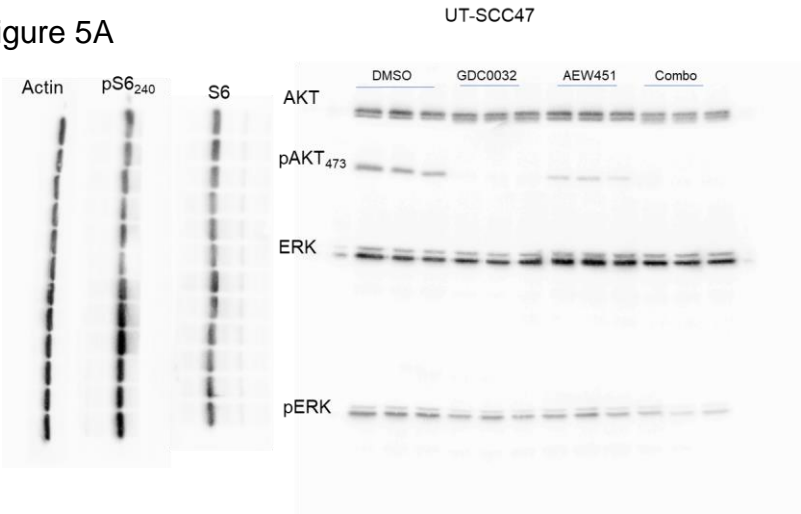

Figure S1B

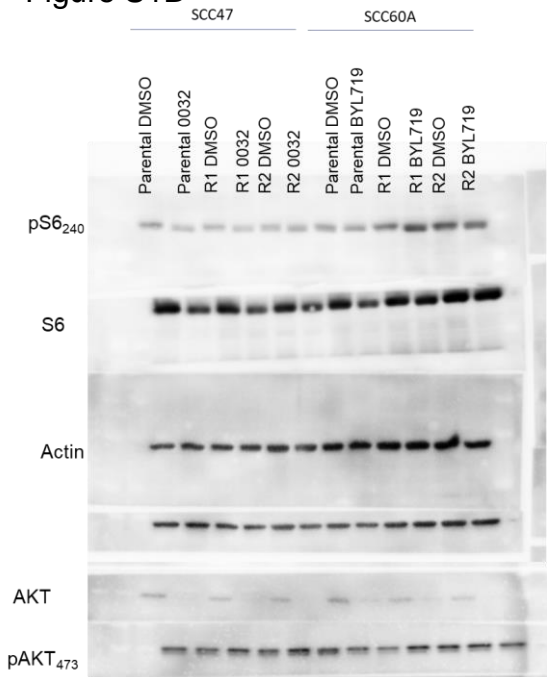

Figure S3

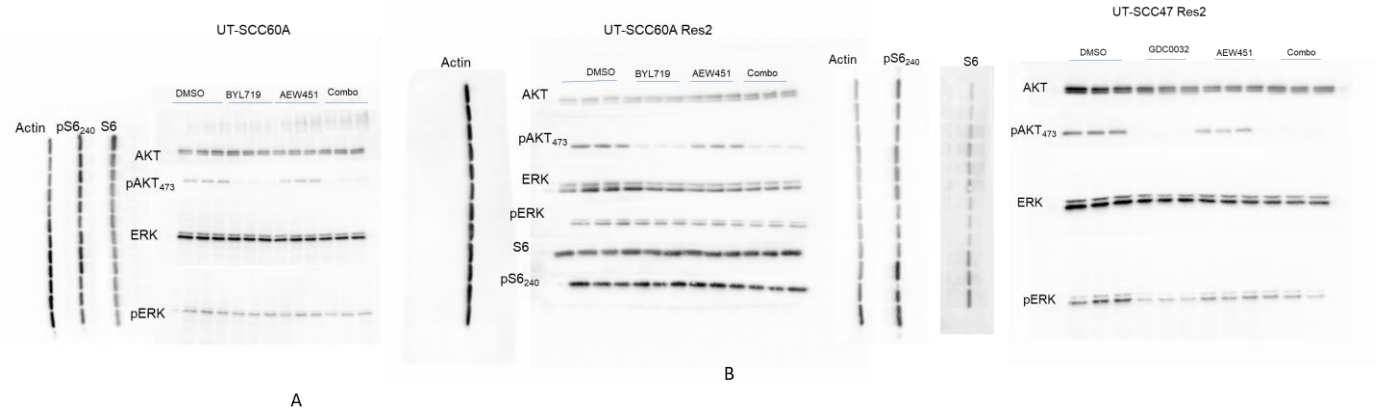

Figure S7

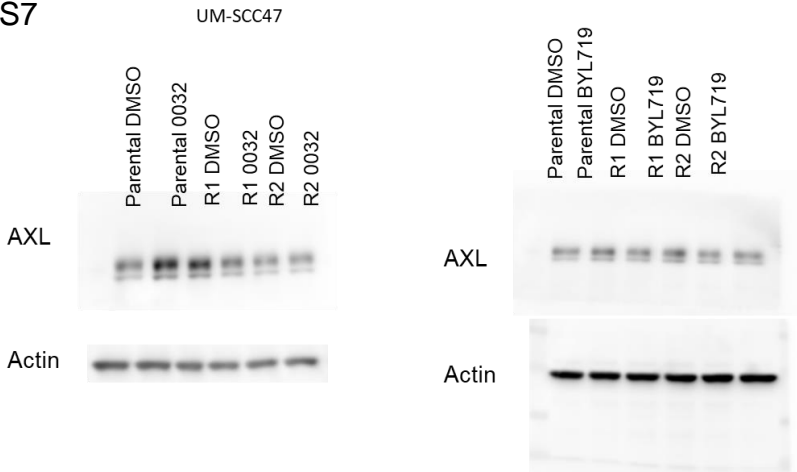

Supplement: s1 [file s1]
