# Supplementary material for: IGF2 Mediates Resistance to Isoform-Selective-Inhibitors of the PI3K in HPV Positive Head and Neck Cancer
Source: Cancers (Basel). 2021 May 7;13(9):2250. doi: 10.3390/cancers13092250 (PMC8125641; doi:10.3390/cancers13092250)
Supplement: Supplementary file 1 [file cancers-13-02250-s001.zip › table S1.xlsx]

## Sheet: Sheet1
NeatSeq Flow DeSeq2 module Results
	Clusters	A Sensitive SCC47	A Resist SCC47-R2	B Sensitive SCC60A	B Resist SCC60A-R2	log2FoldChange	padj	ensembl_gene_id	description	external_gene_name	kegg_enzyme	go_id	ontology	UNIPROT	pathway	kegg	ko	pathway_info
ENSG00000115524	1	-1.22475	1.2247	-0.00673428	0.00677994	0.306632	7.8370413564227e-7	ENSG00000115524	splicing factor 3b subunit 1 [Source:HGNC Symbol;Acc:HGNC:10768]	SF3B1		GO:0003723/GO:0003729/GO:0006397/GO:0008380/GO:0005634/GO:0016607/GO:0005515/GO:0005681/GO:0000398/GO:0071013/GO:0000245/GO:0005654/GO:0005686/GO:0045815/GO:0000375/GO:0071005/GO:0071004/GO:0005689/GO:0034693/	molecular_function/biological_process/cellular_component/	F8WC19//H7C341/B4DGZ4	path:hsa03040	hsa:23451	ko:K12828	Spliceosome - Homo sapiens (human)
ENSG00000130208	1	-1.22474	1.22475	-0.000865443	0.000864454	1.31459	9.62103163924146e-14	ENSG00000130208	apolipoprotein C1 [Source:HGNC Symbol;Acc:HGNC:607]	APOC1		GO:0045717/GO:0051005/GO:0005576/GO:0006641/GO:0008203/GO:0042157/GO:0043085/GO:0006869/GO:0034361/GO:0005783/GO:0031210/GO:0006629/GO:0034364/GO:0033344/GO:0050995/GO:0034379/GO:0034375/GO:0033700/GO:0010873/GO:0045833/GO:0060228/GO:0034382/GO:0034447/GO:0042627/GO:0055102/GO:0032375/GO:0004859/GO:0005504/GO:0010900/GO:0010916/GO:0032374/GO:0034369/GO:0048261/	biological_process/cellular_component/molecular_function/	K7EPF9/A0A024R0T8/K7ELU7/K7EKP1/K7EPR9/K7EJI9/K7ELM9/K7ERI9	path:hsa04979	hsa:341	ko:K22286	Cholesterol metabolism - Homo sapiens (human)
ENSG00000035115	1	-1.22474	1.22474	-0.00267278	0.00267278	0.408987	0.000386819	ENSG00000035115	SH3 and SYLF domain containing 1 [Source:HGNC Symbol;Acc:HGNC:29546]	SH3YL1		GO:0005515/GO:0035091/GO:0032587/GO:0019902/GO:1900027/GO:0006661/	molecular_function/cellular_component/biological_process/	C9JJI3/F5GYQ6/C9J4Z8//H7C499/H7C1B8/S4R3I7
ENSG00000175197	1	-1.22474	1.22473	-0.00482665	0.00482815	0.807885	3.63750515014233e-13	ENSG00000175197	DNA damage inducible transcript 3 [Source:HGNC Symbol;Acc:HGNC:2726]	DDIT3		GO:0043433/GO:0045944/GO:0090090/GO:0051898/GO:0005634/GO:0005737/GO:0006355/GO:0003677/GO:0003700/GO:0005515/GO:0007049/GO:0006915/GO:0016055/GO:0045893/GO:0000978/GO:0000981/GO:0006986/GO:0001077/GO:0005654/GO:0007050/GO:0120163/GO:0045892/GO:0003714/GO:0046982/GO:0043161/GO:0005829/GO:0034976/GO:0070059/GO:0042803/GO:0008140/GO:0036500/GO:1990440/GO:1902237/GO:0006974/GO:0000976/GO:0000122/GO:…	biological_process/cellular_component/molecular_function/	/Q53YD1/F8W133	path:hsa04010/path:hsa04932/path:hsa05202/path:hsa04141/path:hsa05012/path:hsa05010/path:hsa04210	hsa:1649	ko:K04452	MAPK signaling pathway - Homo sapiens (human)/Non-alcoholic fatty liver disease (NAFLD) - Homo sapiens (human)/Transcriptional misregulation in cancer - Homo sapiens (human)/Protein processing in endoplasmic reticulum - Homo sapiens (human)/Parkinson disease - Homo sapiens (human)/Alzheimer disease - Homo sapiens (human)/Apoptosis - Homo sapiens (human)
ENSG00000185532	1	-1.22473	1.22473	-0.00530354	0.00530433	2.16641	6.19694e-05	ENSG00000185532	protein kinase cGMP-dependent 1 [Source:HGNC Symbol;Acc:HGNC:9414]	PRKG1		GO:1904706/GO:1904753/GO:0005737/GO:0000166/GO:0004672/GO:0004674/GO:0005524/GO:0006468/GO:0016740/GO:0016301/GO:0016310/GO:0005886/GO:0005515/GO:0008152/GO:0004692/GO:0003824/GO:0030553/GO:0005829/GO:0005246/GO:0007165/GO:0043087/GO:0030036/GO:0090331/GO:0001764/GO:0016358/GO:0019934/GO:0030900/GO:0045986/GO:0060087/GO:0005794/	biological_process/cellular_component/molecular_function/	A0A2R8Y507//A0A2R8YH74/B1ALS0/A0A0A0MSB3/A0A2R8YE50
ENSG00000111261	1	-1.22473	1.22473	0.00558253	-0.00558253	0.915332	2.8799517030053e-8	ENSG00000111261	MANSC domain containing 1 [Source:HGNC Symbol;Acc:HGNC:25505]	MANSC1		GO:0016020/GO:0016021/	cellular_component/	/F5H3M3/F5H6G8
ENSG00000157404	1	-1.22473	1.22473	0.00616056	-0.00616088	4.85028	6.57273987799283e-9	ENSG00000157404	KIT proto-oncogene receptor tyrosine kinase [Source:HGNC Symbol;Acc:HGNC:6342]	KIT		GO:0005615/GO:1905065/GO:0005737/GO:0016020/GO:0016021/GO:0046872/GO:0000166/GO:0004672/GO:0005524/GO:0006468/GO:0016740/GO:0016301/GO:0016310/GO:0004713/GO:0007169/GO:0005886/GO:0042803/GO:0005515/GO:0004714/GO:0030218/GO:0006954/GO:0007283/GO:0019955/GO:0038093/GO:0038109/GO:0046854/GO:0042629/GO:0005887/GO:0030154/GO:0004888/GO:0009968/GO:0043066/GO:0043410/GO:0070374/GO:0043235/GO:0008584/GO:…	cellular_component/biological_process/molecular_function	/A0A024RDA0
ENSG00000197935	1	-1.22473	1.22473	-0.00670114	0.00670114	0.561798	0.000189574	ENSG00000197935	zinc finger protein 311 [Source:HGNC Symbol;Acc:HGNC:13847]	ZNF311		GO:0003676/GO:0005634/GO:0046872/GO:0006355/GO:0003677/GO:0005622/GO:0006357/GO:0000981	molecular_function/cellular_component/biological_process	A0A1U9X8W3	path:hsa05168	hsa:282890	ko:K09228	Herpes simplex virus 1 infection - Homo sapiens (human)
ENSG00000114354	1	-1.22472	1.22472	-0.00709553	0.00709553	0.410718	3.21922957591996e-9	ENSG00000114354	TRK-fused gene [Source:HGNC Symbol;Acc:HGNC:11758]	TFG		GO:0005737/GO:0005783/GO:0006888/GO:0005515/GO:0042802/GO:0048208/GO:0000139/GO:0005829/GO:0043123/GO:0070971	cellular_component/biological_process/molecular_function	C9JJP5//C9JTY3/C9JUE0
ENSG00000117036	1	-1.22471	1.22471	-0.00859489	0.00859489	0.527762	2.10875721833818e-12	ENSG00000117036	ETS variant 3 [Source:HGNC Symbol;Acc:HGNC:3492]	ETV3		GO:0005634/GO:0006355/GO:0003677/GO:0003700/GO:0043565/GO:0000122/GO:0000981/GO:0030154/GO:0006357/GO:0003674/GO:0008150/GO:0001227/GO:0000977/GO:0017151/GO:0008285/GO:0097011/GO:0000790/GO:0017053/GO:0090571	cellular_component/biological_process/molecular_function
ENSG00000100596	1	-1.22471	1.22471	0.00870795	-0.00870795	0.626644	7.73193507474099e-8	ENSG00000100596	serine palmitoyltransferase long chain base subunit 2 [Source:HGNC Symbol;Acc:HGNC:11278]	SPTLC2		GO:0016020/GO:0016021/GO:0016740/GO:0005783/GO:0005789/GO:0003824/GO:0016746/GO:0006629/GO:0030170/GO:0009058/GO:0004758/GO:0006686/GO:0046511/GO:0046512/GO:0046513/GO:0006665/GO:0030148/GO:1904504/GO:0017059/	cellular_component/molecular_function/biological_process/	H0YJ96/A0A024R6H1/H0YJV2	path:hsa01100/path:hsa00600/path:hsa04071	hsa:9517	ko:K00654	Metabolic pathways - Homo sapiens (human)/Sphingolipid metabolism - Homo sapiens (human)/Sphingolipid signaling pathway - Homo sapiens (human)
ENSG00000172602	1	-1.22471	1.22471	-0.00891627	0.00891512	1.5984	0.000233953	ENSG00000172602	Rho family GTPase 1 [Source:HGNC Symbol;Acc:HGNC:18314]	RND1		GO:0043231/GO:0003924/GO:0005525/GO:0005886/GO:0015629/GO:0005737/GO:0016020/GO:0000166/GO:0005622/GO:0007264/GO:0005856/GO:0005515/GO:0030334/GO:0005829/GO:0019901/GO:0005912/GO:0005938/GO:0007266/GO:0008360/GO:0005102/GO:0051017/GO:0007015/GO:0030950/GO:0032956/GO:0032153/GO:0007162/GO:0016322/	cellular_component/molecular_function/biological_process/	F8VXU4//H0YHG7
ENSG00000257671	1	-1.2247	1.2247	-0.00990771	0.00990771	1.54137	1.42360904450648e-13
ENSG00000215492	1	-1.2247	1.2247	-0.010106	0.0101051	1.49785	0.000189245
ENSG00000143995	1	-1.2247	1.2247	-0.0103783	0.0103783	1.03232	3.59852e-06	ENSG00000143995	Meis homeobox 1 [Source:HGNC Symbol;Acc:HGNC:7000]	MEIS1		GO:0005634/GO:0006355/GO:0003677/GO:0006366/GO:0005515/GO:0007275/GO:0000981/GO:0000978/GO:0001077/GO:0003682/GO:0003705/GO:0043565/GO:0046982/GO:0001525/GO:0002089/GO:0007626/GO:0030097/GO:0035855/GO:0045638/GO:0045665/GO:0045944/GO:0048514/GO:0060044/GO:0060216/GO:0005667/	cellular_component/biological_process/molecular_function/	H0YNY8/E9PDC4/F5GYS8//U3KPR8
ENSG00000174106	1	-1.2247	1.22471	0.010002	-0.0100175	0.825915	6.85684930546385e-28	ENSG00000174106	LEM domain containing 3 [Source:HGNC Symbol;Acc:HGNC:28887]	LEMD3		GO:0003676/GO:0005634/GO:0016020/GO:0016021/GO:0031965/GO:0003677/GO:0005515/GO:0005639/GO:0001525/GO:0006997/GO:1902531/GO:0005637/GO:0030512/GO:0030514/GO:0006998/GO:0032926	molecular_function/cellular_component/biological_process	A0A024RBB9		hsa:23592	ko:K19410
ENSG00000275954	1	-1.2247	1.2247	-0.0110317	0.0110317	7.02425	6.34875e-05	ENSG00000275954	TBC1 domain family member 3F [Source:HGNC Symbol;Acc:HGNC:18257]	TBC1D3F				A0A087WT91
ENSG00000117448	1	-1.22469	1.22471	0.010515	-0.0105337	0.722545	4.04157694591168e-12	ENSG00000117448	aldo-keto reductase family 1 member A1 [Source:HGNC Symbol;Acc:HGNC:380]	AKR1A1		GO:0016491/GO:0055114/GO:0005515/GO:0005615/GO:0022900/GO:0005829/GO:0070062/GO:0004032/GO:0008106/GO:0009055/GO:1901687/GO:0004033/GO:0006081/GO:0019640/GO:0047939/GO:0006006/GO:0019853/GO:0042840/GO:0046185/GO:0016324	molecular_function/biological_process/cellular_component	V9GYP9/Q5T621/V9HWI0/V9GYG2	path:hsa00561/path:hsa00040/path:hsa01100/path:hsa00010	hsa:10327	ko:K00002	Glycerolipid metabolism - Homo sapiens (human)/Pentose and glucuronate interconversions - Homo sapiens (human)/Metabolic pathways - Homo sapiens (human)/Glycolysis / Gluconeogenesis - Homo sapiens (human)
ENSG00000164647	1	-1.22468	1.22468	-0.0124374	0.0124374	1.45703	8.66165017668504e-26	ENSG00000164647	STEAP family member 1 [Source:HGNC Symbol;Acc:HGNC:11378]	STEAP1		GO:0016020/GO:0016021/GO:0046872/GO:0016491/GO:0055114/GO:0006811/GO:0055085/GO:0005768/GO:0005886/GO:0010008/GO:0005887/GO:0005911/GO:0005215/GO:0015267/GO:0055072	cellular_component/molecular_function/biological_process	H7C0D8/
ENSG00000063046	1	-1.22467	1.22467	0.013226	-0.013226	0.627277	6.05172528033195e-15	ENSG00000063046	eukaryotic translation initiation factor 4B [Source:HGNC Symbol;Acc:HGNC:3285]	EIF4B		GO:0003676/GO:0003723/GO:0003743/GO:0006412/GO:0006413/GO:0005829/GO:0005515/GO:0002181/GO:0097010/GO:0005844/GO:0006446/GO:0016281/GO:0001731/GO:0043024/GO:0004386/GO:0033592/GO:0034057/GO:0030425/GO:0043025/GO:0098794	molecular_function/biological_process/cellular_component	/E7EX17/F8VX11/F8VRU1/F8VSC7/F8VP89/F8W0K0/F8VYE9
ENSG00000135828	1	-1.22467	1.22467	0.0137813	-0.0137813	0.717464	2.65536987656411e-10	ENSG00000135828	ribonuclease L [Source:HGNC Symbol;Acc:HGNC:10050]	RNASEL	05165+2.7.11.1/04150+2.7.11.1/04926+2.7.11.1/04714+2.7.11.1/04151+2.7.11.1	GO:0003723/GO:0005737/GO:0046872/GO:0000166/GO:0004672/GO:0005524/GO:0006468/GO:0016787/GO:0005739/GO:0090305/GO:0005515/GO:0006397/GO:0004519/GO:0090501/GO:0090502/GO:0004518/GO:0051607/GO:0004540/GO:0045944/GO:0005829/GO:0005575/GO:0005759/GO:0045071/GO:0060337/GO:0004521/GO:0060338/GO:0019843/GO:0043021/GO:0006364/GO:0043488/GO:0045444/GO:2001275/GO:0016363	molecular_function/cellular_component/biological_process
ENSG00000134108	1	-1.22465	1.22465	0.0151229	-0.0151229	1.67524	3.48476946314329e-70	ENSG00000134108	ADP ribosylation factor like GTPase 8B [Source:HGNC Symbol;Acc:HGNC:25564]	ARL8B		GO:0005737/GO:0016020/GO:0000166/GO:0005525/GO:0005622/GO:0005765/GO:0051301/GO:0005856/GO:0007049/GO:0003924/GO:0005819/GO:0030496/GO:0005764/GO:0007059/GO:0005515/GO:0005768/GO:0031902/GO:0070062/GO:0051233/GO:0043014/GO:0005774/GO:0019003/GO:0048487/GO:0032418/	cellular_component/molecular_function/biological_process/	/F2Z344/F8WAW5/A0A024R2D4
ENSG00000133703	1	-1.22464	1.22464	-0.016114	0.016114	0.619487	6.56037e-05	ENSG00000133703	KRAS proto-oncogene GTPase [Source:HGNC Symbol;Acc:HGNC:6407]	KRAS		GO:0010628/GO:0001934/GO:0005737/GO:0016020/GO:0000166/GO:0007165/GO:0003924/GO:0005525/GO:0005829/GO:0005886/GO:0005515/GO:0005925/GO:0031234/GO:0008284/GO:0031647/GO:0044877/GO:0000165/GO:0002223/GO:0007265/GO:0019002/GO:0019003/GO:0030275/GO:0001889/GO:0007565/GO:0008542/GO:0019221/GO:0021897/GO:0030036/GO:0032228/GO:0035022/GO:0035900/GO:0038002/GO:0043406/GO:0043524/GO:0045596/GO:0048169/GO:…	biological_process/cellular_component/molecular_function	L7RSL8/G3V4K2/G3V5T7/A0A024RAV5	path:hsa04916/path:hsa04921/path:hsa04720/path:hsa04370/path:hsa05216/path:hsa05219/path:hsa05160/path:hsa05165/path:hsa04014/path:hsa04929/path:hsa04140/path:hsa05230/path:hsa04015/path:hsa04211/path:hsa04725/path:hsa05220/path:hsa05224/path:hsa05205/path:hsa05034/path:hsa05206/path:hsa05166/path:hsa05213/path:hsa05215/path:hsa04137/path:hsa04810/path:hsa04933/path:hsa04910/path:hsa04371/path:hs…	hsa:3845	ko:K07827	Melanogenesis - Homo sapiens (human)/Oxytocin signaling pathway - Homo sapiens (human)/Long-term potentiation - Homo sapiens (human)/VEGF signaling pathway - Homo sapiens (human)/Thyroid cancer - Homo sapiens (human)/Bladder cancer - Homo sapiens (human)/Hepatitis C - Homo sapiens (human)/Human papillomavirus infection - Homo sapiens (human)/Ras signaling pathway - Homo sapiens (human)/GnRH secre…
ENSG00000172071	1	-1.22463	1.22466	-0.0156857	0.0156567	0.403268	0.000937807	ENSG00000172071	eukaryotic translation initiation factor 2 alpha kinase 3 [Source:HGNC Symbol;Acc:HGNC:3255]	EIF2AK3		GO:0004672/GO:0005524/GO:0006468/GO:0005737/GO:0016020/GO:0016021/GO:0000166/GO:0004674/GO:0016740/GO:0005783/GO:0005789/GO:0016301/GO:0016310/GO:0005515/GO:0002063/GO:0042802/GO:0006986/GO:0001501/GO:0006417/GO:0051260/GO:0030282/GO:0017148/GO:0001503/GO:0019899/GO:0019903/GO:0042803/GO:0046777/GO:0007029/GO:0006919/GO:0019722/GO:0034976/GO:0031642/GO:0010628/GO:0034198/GO:0018105/GO:0030968/GO:…	molecular_function/biological_process/cellular_component	C9J185/E7ER02/
ENSG00000165511	1	-1.22462	1.22462	0.0176246	-0.0176246	1.66493	4.46958199832825e-16
ENSG00000164327	1	-1.22459	1.22459	-0.0192275	0.0192275	0.946217	1.04463329675801e-9	ENSG00000164327	RPTOR independent companion of MTOR complex 2 [Source:HGNC Symbol;Acc:HGNC:28611]	RICTOR		GO:0005515/GO:0007275/GO:0031929/GO:0031932/GO:0005829/GO:0032956/GO:0030950/GO:0009792/GO:0032008/GO:0031532/GO:0032148/GO:0019901/GO:0018105/GO:0051897/GO:0051896/GO:0008047/GO:0030010/GO:0042325/GO:0043022/GO:0001932/GO:0001938/GO:0010468/GO:0030838/GO:0033135/GO:0043087/GO:0050727/GO:0050731/GO:2000114	molecular_function/biological_process/cellular_component	/D6R9S6
ENSG00000272468	1	-1.22459	1.22459	-0.0193375	0.0193375	1.27422	0.000491294
ENSG00000164128	1	-1.22459	1.22459	-0.0193533	0.0193528	3.78764	0.000364992	ENSG00000164128	neuropeptide Y receptor Y1 [Source:HGNC Symbol;Acc:HGNC:7956]	NPY1R		GO:0003151/GO:0016020/GO:0016021/GO:0004930/GO:0007186/GO:0005886/GO:0005515/GO:0007165/GO:0007218/GO:0004983/GO:0005887/GO:0007187/GO:0001601/GO:0001602/GO:0006006/GO:0007193/GO:0007626/GO:0007631/GO:0008217/GO:0019233/GO:0040014/	biological_process/cellular_component/molecular_function/	D6R9D0/D6RI97/D6RHH6/B4DKL9/D6REY0//D6RC44
ENSG00000148672	1	-1.22459	1.22459	-0.0197652	0.0197652	0.433424	7.46357e-05	ENSG00000148672	glutamate dehydrogenase 1 [Source:HGNC Symbol;Acc:HGNC:4335]	GLUD1		GO:0005737/GO:0000166/GO:0005524/GO:0016491/GO:0055114/GO:0005739/GO:0005525/GO:0005759/GO:0006520/GO:0006541/GO:0005515/GO:0016639/GO:0021762/GO:0032024/GO:0042802/GO:0006537/GO:0008652/GO:0004352/GO:0004353/GO:0043531/GO:0070403/GO:0070728/GO:0006538/GO:0072350	cellular_component/molecular_function/biological_process
ENSG00000168137	1	-1.22456	1.22457	-0.0210853	0.021076	1.39886	1.68728987519792e-38	ENSG00000168137	SET domain containing 5 [Source:HGNC Symbol;Acc:HGNC:25566]	SETD5		/GO:0005634/GO:0005654/GO:0006325/GO:0016569/GO:0016593/GO:1902275/GO:0035065	/cellular_component/biological_process	C9JLA7/F8WD12/H7C1Q2/F2Z2J0/H7C1F2/H0Y3R4//E7EWN3/C9JLM1
ENSG00000072756	1	-1.22456	1.22456	-0.0214997	0.0214997	1.09361	3.34935546536668e-17	ENSG00000072756	tRNA nucleotidyl transferase 1 [Source:HGNC Symbol;Acc:HGNC:17341]	TRNT1		GO:0003723/GO:0006396/GO:0000166/GO:0005524/GO:0016740/GO:0008033/GO:0005739/GO:0016779/GO:0000049/GO:0005654/GO:0005759/GO:0005622/GO:1990180/GO:0034062/GO:0052927/GO:0052928/GO:0052929/GO:0001680/GO:0042780/	molecular_function/biological_process/cellular_component/	F8W8C3/C9JRS7/
ENSG00000170442	1	-1.22456	1.22456	0.0215401	-0.0215401	2.00891	1.47736114526901e-31	ENSG00000170442	keratin 86 [Source:HGNC Symbol;Acc:HGNC:6463]	KRT86		GO:0005198/GO:0005882/GO:0005515/GO:0005615/GO:0045095/GO:0005829/GO:0031424/GO:0070268	molecular_function/cellular_component/biological_process	/U3KPR1
ENSG00000152785	1	-1.22455	1.22455	-0.0216635	0.0216635	4.309	4.55524475168151e-8	ENSG00000152785	bone morphogenetic protein 3 [Source:HGNC Symbol;Acc:HGNC:1070]	BMP3		GO:0008083/GO:0010469/GO:0005576/GO:0007275/GO:0005125/GO:0005615/GO:0030154/GO:0051216/GO:0070062/GO:0042981/GO:0060395/GO:0001503/GO:0007267/GO:0005102/GO:0005160/GO:0010862/GO:0043408/GO:0048468/GO:0001501/GO:0070700/GO:0001649	molecular_function/biological_process/cellular_component
ENSG00000107295	1	-1.22451	1.22451	-0.0237732	0.0237735	5.26141	4.93163428139616e-35	ENSG00000107295	SH3 domain containing GRB2 like 2 endophilin A1 [Source:HGNC Symbol;Acc:HGNC:10831]	SH3GL2		GO:0005737/GO:0016020/GO:0006897/GO:0005515/GO:0008289/GO:0005886/GO:0042802/GO:0005768/GO:0005829/GO:0005769/GO:0019886/GO:0007165/GO:0007417/GO:0061024/GO:0000139/GO:0031175/GO:0042059/GO:0030669/GO:0097484/GO:1990416/GO:0008022/GO:0019901/GO:0042803/GO:0002090/GO:0016191/GO:0048488/GO:0060988/GO:0097749/GO:0097753/GO:0099050/GO:1903527/GO:2000369/GO:0030672/GO:0043025/GO:0045202/GO:0048471/GO:…	cellular_component/biological_process/molecular_function
ENSG00000139644	1	-1.22451	1.22451	0.0239485	-0.0239485	0.359626	2.25229233995014e-7	ENSG00000139644	transmembrane BAX inhibitor motif containing 6 [Source:HGNC Symbol;Acc:HGNC:11723]	TMBIM6		/GO:0016020/GO:0016021/GO:0043066/GO:0005783/GO:0005789/GO:0006915/GO:0006914/GO:0006986/GO:0005737/GO:0005634/GO:0005887/GO:0005515/GO:0031625/GO:1902236/GO:0019899/GO:0034620/GO:0032091/GO:2001234/GO:0031966/GO:0060698/GO:0010523/GO:0033119/GO:0060702/GO:1902065/GO:1903298/GO:0032469/GO:0034976/GO:0051025/GO:0070059/GO:1990441	/cellular_component/biological_process/molecular_function	F8VR05/F8VQW0/F8VQQ5/F8W086/F8W1G3/F8W201/F8VVJ4/F8VPI1/F8VX73/A0A024R0Z5//F8VSI7/F8VY06/A0A0G2JKZ4/F8W1V3	path:hsa05130	hsa:7009	ko:K21889	Pathogenic Escherichia coli infection - Homo sapiens (human)
ENSG00000182362	1	-1.22451	1.22451	0.0240512	-0.0240512	0.958353	5.43495075105856e-9	ENSG00000182362	ybeY metalloendoribonuclease [Source:HGNC Symbol;Acc:HGNC:1299]	YBEY		GO:0005634/GO:0046872/GO:0016787/GO:0090305/GO:0006508/GO:0004519/GO:0004518/GO:0004222/GO:0006364	cellular_component/molecular_function/biological_process
ENSG00000154822	1	-1.22449	1.22449	-0.0250362	0.0250362	2.48859	1.31879487276262e-60	ENSG00000154822	phospholipase C like 2 [Source:HGNC Symbol;Acc:HGNC:9064]	PLCL2	00562+3.1.4.11/04070+3.1.4.11	GO:0005737/GO:0035556/GO:0007165/GO:0006629/GO:0008081/GO:0004435/GO:0050811/GO:0070679/GO:0032228/GO:0120163/GO:0002322/GO:0002337/GO:0007214/GO:0033135/GO:0050859/GO:1900122/GO:0005622/GO:0016787/GO:0016042	cellular_component/biological_process/molecular_function	/H7C276
ENSG00000102387	1	-1.22448	1.22448	-0.0255595	0.0255583	1.03924	8.16826002092957e-19	ENSG00000102387	TATA-box binding protein associated factor 7 like [Source:HGNC Symbol;Acc:HGNC:11548]	TAF7L		GO:0005634/GO:0005737/GO:1903508/GO:0007275/GO:0005669/GO:0006367/GO:0030154/GO:0007283/GO:0006357/GO:0035035/GO:0008134/GO:0003674/GO:0008150/GO:0003713/GO:0051123/GO:0044212	cellular_component/biological_process/molecular_function	/A0A024RCI3
ENSG00000166920	1	-1.22446	1.22447	-0.0263824	0.0263728	1.31083	4.92250355331367e-10	ENSG00000166920	chromosome 15 open reading frame 48 [Source:HGNC Symbol;Acc:HGNC:29898]	C15orf48		GO:0005634/GO:0016020/GO:0016021/GO:0005515/GO:0005751/GO:0009617	cellular_component/molecular_function/biological_process	H0YKW5/A0A024R5U4		hsa:84419
ENSG00000151690	1	-1.22445	1.22445	0.0266916	-0.0266916	0.588331	9.66250421976525e-11	ENSG00000151690	major facilitator superfamily domain containing 6 [Source:HGNC Symbol;Acc:HGNC:24711]	MFSD6		/GO:0016020/GO:0016021	/cellular_component	C9JAZ7/H7C0X2/C9IYL1//C9JJH2/H7C284/C9J134
ENSG00000185442	1	-1.22443	1.22443	-0.027988	0.027988	1.54411	2.81798789891892e-8	ENSG00000185442	family with sequence similarity 174 member B [Source:HGNC Symbol;Acc:HGNC:34339]	FAM174B		GO:0016020/GO:0016021/	cellular_component/	/H3BTJ4/G3V5D1/H3BR69/H3BP98/H3BPY1
ENSG00000070081	1	-1.22442	1.22442	0.0280104	-0.0280104	0.517642	8.02997227456574e-7	ENSG00000070081	nucleobindin 2 [Source:HGNC Symbol;Acc:HGNC:8044]	NUCB2		/GO:0005509/GO:0005634/GO:0005737/GO:0016020/GO:0046872/GO:0005783/GO:0003677/GO:0005794/GO:0005515/GO:0005576/GO:0005615/GO:0070062/GO:0005886/GO:0005635/GO:0005829/GO:0005793/GO:0005640	/molecular_function/cellular_component	H0YD18/E9PLE9/Q2L696/A0A1B0GXJ7/E9PLR5/E9PM22/E9PKG6/H0YEG8/E9PLR0/E9PRQ3//E9PJP3/A0A2R8Y6G7/A0A087WSV8
ENSG00000139651	1	-1.22442	1.22442	0.0283233	-0.0283233	0.532879	2.64466e-05	ENSG00000139651	zinc finger protein 740 [Source:HGNC Symbol;Acc:HGNC:27465]	ZNF740		GO:0003676/GO:0005634/GO:0046872/GO:0003700/GO:0000981/GO:0045944/GO:0005654/GO:0044212	molecular_function/cellular_component/biological_process
ENSG00000170545	1	-1.2244	1.22442	-0.028657	0.0286385	0.640272	0.000399589	ENSG00000170545	small cell adhesion glycoprotein [Source:HGNC Symbol;Acc:HGNC:26918]	SMAGP		GO:0016020/GO:0016021/GO:0005654/GO:0005886/GO:0030054/GO:0005515/GO:0031410/GO:0030659/	cellular_component/molecular_function/	/A0A0A0MRX0/S4R405/S4R466/S4R3E1
ENSG00000276180	1	-1.2244	1.2244	-0.0292091	0.0292091	0.887606	6.78263854050416e-7	ENSG00000276180	histone cluster 1 H4 family member i [Source:HGNC Symbol;Acc:HGNC:4793]	HIST1H4I		GO:0003723/GO:0005634/GO:0016020/GO:0003677/GO:0046982/GO:0006334/GO:0000786/GO:0005694/GO:0005515/GO:0006352/GO:0005576/GO:0005654/GO:0070062/GO:0044267/GO:0032991/GO:0000784/GO:0034080/GO:0019904/GO:0045652/GO:0006335/GO:0006336/GO:0000228/GO:0060964/GO:0000183/GO:0045814/GO:0051290/GO:0006303/GO:0045653/GO:0000788/GO:0016233/GO:0032200	molecular_function/cellular_component/biological_process	B2R4R0	path:hsa05203/path:hsa05322/path:hsa05034	hsa:8294/hsa:8363/hsa:8367/hsa:8370/hsa:8365/hsa:8359/hsa:8366/hsa:8362/hsa:8360/hsa:121504/hsa:8364/hsa:554313/hsa:8361/hsa:8368	ko:K11254	Viral carcinogenesis - Homo sapiens (human)/Systemic lupus erythematosus - Homo sapiens (human)/Alcoholism - Homo sapiens (human)
ENSG00000260912	1	-1.2244	1.2244	0.0291983	-0.0291999	0.837584	9.91028e-05
ENSG00000152601	1	-1.22435	1.22441	0.0300368	-0.0300981	0.268366	0.000116732	ENSG00000152601	muscleblind like splicing regulator 1 [Source:HGNC Symbol;Acc:HGNC:6923]	MBNL1		GO:0003723/GO:0006397/GO:0008380/GO:0005634/GO:0005737/GO:0046872/GO:0005829/GO:0005654/GO:0005515/GO:0007399/GO:0000381/GO:0043484/GO:0010494/GO:0001701/GO:0003725/GO:0045445/GO:0030326/GO:0001069	molecular_function/biological_process/cellular_component	A0A0A0MQX8/Q86VM6/H7C4Y1/C9J7P7/H7C4T5//C9JCX1/C9JP00/C9J4T8
ENSG00000167535	1	-1.22433	1.22433	-0.032029	0.032029	0.592684	4.257281656488e-9	ENSG00000167535	calcium voltage-gated channel auxiliary subunit beta 3 [Source:HGNC Symbol;Acc:HGNC:1403]	CACNB3		GO:0070588/GO:0005245/GO:0005891/GO:0005737/GO:0016020/GO:0005244/GO:0006811/GO:0034765/GO:0005515/GO:0006816/GO:0005262/GO:0005886/GO:0007268/GO:0005829/GO:0005246/GO:0008331/GO:0007528/GO:0051899/GO:1901385/GO:1990454/GO:1901843/GO:0072659/GO:0060402/GO:0061577/GO:0098903/GO:0019901/GO:0050852/GO:0050966/GO:0090314/GO:0090650/GO:1901386/GO:1901387/GO:1902630/GO:1905788/GO:2000463/GO:0016324/	biological_process/molecular_function/cellular_component/	F8W0F8/F8VNV8//F8W1N3/F8VWK1/F8VU10/F8VUW8/F8VV14/H0YHY2/H0YHK1
ENSG00000131171	1	-1.22432	1.22431	-0.0323764	0.032391	0.820478	5.17210435127688e-15	ENSG00000131171	SH3 domain binding glutamate rich protein like [Source:HGNC Symbol;Acc:HGNC:10823]	SH3BGRL		GO:0005634/GO:0005737/GO:0009967/GO:0005615/GO:0070062/GO:0017124/GO:0005070	cellular_component/biological_process/molecular_function	V9HW48		hsa:6451	ko:K23740
ENSG00000066382	1	-1.22432	1.22432	-0.0322208	0.0322212	4.8258	1.81654997055459e-17	ENSG00000066382	metallophosphoesterase domain containing 2 [Source:HGNC Symbol;Acc:HGNC:1180]	MPPED2		GO:0046872/GO:0016787/GO:0005515/GO:0007399/	molecular_function/biological_process/	F2Z346//E9PQW8
ENSG00000124766	1	-1.22429	1.22429	0.0333003	-0.0333003	1.86274	8.7367087833478e-36	ENSG00000124766	SRY-box 4 [Source:HGNC Symbol;Acc:HGNC:11200]	SOX4		GO:0008284/GO:0043065/GO:0050821/GO:0005737/GO:0060412/GO:0005634/GO:0090263/GO:0045893/GO:0005654/GO:0006366/GO:0005739/GO:0003677/GO:0003700/GO:0005515/GO:0003713/GO:0045727/GO:0000981/GO:0006355/GO:0030154/GO:0044798/GO:0001077/GO:0045944/GO:0001501/GO:0008285/GO:0031647/GO:0000976/GO:0021510/GO:0000978/GO:0031397/GO:0007507/GO:0042593/GO:0003183/GO:0060548/GO:0042769/GO:0048485/GO:0071333/GO:…	biological_process/cellular_component/molecular_function
ENSG00000101311	1	-1.22429	1.22429	-0.0334207	0.0334207	0.658868	1.53784422009587e-9	ENSG00000101311	fermitin family member 1 [Source:HGNC Symbol;Acc:HGNC:15889]	FERMT1		GO:0005737/GO:0016020/GO:0007155/GO:0005829/GO:0005886/GO:0005856/GO:0042995/GO:0030054/GO:0007229/GO:0005925/GO:0032587/GO:0043616/GO:0090162/GO:0051546/GO:0051015/GO:0001954/GO:0010629/GO:0030511/GO:0033630/GO:0042308/GO:0051886/GO:0071711/GO:0090090/GO:2000647/GO:2001203	cellular_component/biological_process/molecular_function	/G3V1L6/Q5JWV4
ENSG00000184012	1	-1.22429	1.22429	0.0335319	-0.0335319	2.71598	2.3712471298058e-9	ENSG00000184012	transmembrane serine protease 2 [Source:HGNC Symbol;Acc:HGNC:11876]	TMPRSS2		GO:0016020/GO:0016021/GO:0016787/GO:0005886/GO:0008233/GO:0006508/GO:0005576/GO:0004252/GO:0016540/GO:0005044/GO:0006898/GO:0008236/GO:0005515/GO:0070062/GO:0005887/GO:0046598/	cellular_component/molecular_function/biological_process/	/C9JB05/C9JKZ3/C9J5Y1
ENSG00000146013	1	-1.22426	1.22426	-0.0344638	0.0344638	2.54098	0.000986367	ENSG00000146013	GDNF family receptor alpha 3 [Source:HGNC Symbol;Acc:HGNC:4245]	GFRA3		GO:0016020/GO:0005829/GO:0005886/GO:0005515/GO:0009897/GO:0031225/GO:0038023/GO:0043235/GO:0007399/GO:0007165/GO:0005102/GO:0007411/GO:0005088/GO:0000165/GO:0019898/GO:0007422/GO:0008046/GO:0001764/GO:0048485/GO:0048666	cellular_component/molecular_function/biological_process	K9J968/
ENSG00000122378	1	-1.22423	1.22423	0.0354219	-0.0354219	1.15754	4.41118642277939e-15	ENSG00000122378	peroxiredoxin like 2A [Source:HGNC Symbol;Acc:HGNC:28651]	PRXL2A		GO:0005737/GO:0055114/GO:0005576/GO:0098869/GO:0016209/GO:0045670	cellular_component/biological_process/molecular_function
ENSG00000081985	1	-1.22421	1.22421	-0.0361791	0.0361791	3.22672	8.63602521315657e-13	ENSG00000081985	interleukin 12 receptor subunit beta 2 [Source:HGNC Symbol;Acc:HGNC:5972]	IL12RB2		GO:0016020/GO:0016021/GO:0004896/GO:0005886/GO:0009897/GO:0043235/GO:0005887/GO:0035722/GO:0032729/GO:0007166/GO:0008284/GO:0070757/GO:0019955/GO:0019901/GO:0018108/GO:0032496/GO:0032609/GO:0034097//GO:0019221	cellular_component/molecular_function/biological_process/	/H0Y5V0/A0A0A0MTN7
ENSG00000166349	1	-1.22419	1.22419	-0.036973	0.036973	1.44296	2.24867e-06	ENSG00000166349	recombination activating 1 [Source:HGNC Symbol;Acc:HGNC:9831]	RAG1		GO:0005634/GO:0046872/GO:0016740/GO:0016787/GO:0006325/GO:0003677/GO:0008270/GO:0042803/GO:0043565/GO:0004519/GO:0090305/GO:0005515/GO:0008152/GO:0004842/GO:0006310/GO:0051865/GO:0061630/GO:0004518/GO:0010390/GO:0003824/GO:0005654/GO:0006955/GO:0042393/GO:0030183/GO:0033151/GO:0002331/GO:0033077/GO:0042802/GO:0002250/GO:0008542/GO:0043029/GO:0043154/GO:0045580/GO:0045582/GO:0048538/GO:0070233/GO:…	cellular_component/molecular_function/biological_process
ENSG00000163347	1	-1.22416	1.22416	-0.037699	0.037699	0.727795	1.79889990105812e-10	ENSG00000163347	claudin 1 [Source:HGNC Symbol;Acc:HGNC:2032]	CLDN1		GO:0016020/GO:0016021/GO:0005198/GO:0005886/GO:0005515/GO:0030054/GO:0046718/GO:0005923/GO:0005887/GO:0051291/GO:0042802/GO:0007568/GO:0008065/GO:0009636/GO:0016338/GO:0032496/GO:0042538/GO:0045471/GO:0061436/GO:0061772/GO:0070673/GO:0071284/GO:0071346/GO:0071356/GO:0071548/GO:0071560/GO:0090557/GO:0097421/GO:1903348/GO:1903545/GO:0005737/GO:0016324/GO:0016328/GO:0016323/GO:0051260/GO:0016032/GO:…	cellular_component/molecular_function/biological_process	A5JSJ9	path:hsa04514/path:hsa05130/path:hsa04670/path:hsa04530/path:hsa05160	hsa:9076	ko:K06087	Cell adhesion molecules (CAMs) - Homo sapiens (human)/Pathogenic Escherichia coli infection - Homo sapiens (human)/Leukocyte transendothelial migration - Homo sapiens (human)/Tight junction - Homo sapiens (human)/Hepatitis C - Homo sapiens (human)
ENSG00000133135	1	-1.22416	1.22416	-0.0379055	0.0379055	1.11583	3.42429729509257e-8	ENSG00000133135	ring finger protein 128 E3 ubiquitin protein ligase [Source:HGNC Symbol;Acc:HGNC:21153]	RNF128		GO:0016020/GO:0016021/GO:0005737/GO:0046872/GO:0016740/GO:0016567/GO:0005856/GO:0005515/GO:0048471/GO:0005783/GO:0005794/GO:0006511/GO:0061630/GO:0005829/GO:0016579/GO:0012505/GO:0031647/GO:0005770/GO:0061462/GO:1904352/GO:0042036	cellular_component/molecular_function/biological_process	/Q5JSK4
ENSG00000206560	1	-1.22412	1.22413	-0.0391002	0.0390892	1.07046	9.63559977232081e-20	ENSG00000206560	ankyrin repeat domain 28 [Source:HGNC Symbol;Acc:HGNC:29024]	ANKRD28		GO:0005634/GO:0005515/GO:0005654/GO:0000139/GO:0005829/GO:0048208/	cellular_component/molecular_function/biological_process/	A0A024R2G8//B4DIW9/F8WDU2
ENSG00000162695	1	-1.22411	1.22411	0.0394751	-0.0394751	0.43832	3.26148e-05	ENSG00000162695	solute carrier family 30 member 7 [Source:HGNC Symbol;Acc:HGNC:19306]	SLC30A7		GO:0005737/GO:0016020/GO:0016021/GO:0005794/GO:0055085/GO:0006811/GO:0006812/GO:0098655/GO:0008324/GO:0006829/GO:0031982/GO:0032119/GO:0031410/GO:0048471/	cellular_component/biological_process/molecular_function/	H0Y362/
ENSG00000036549	1	-1.2241	1.22413	0.0392904	-0.0393148	0.501012	0.000368688	ENSG00000036549	zinc finger ZZ-type containing 3 [Source:NCBI gene;Acc:26009]	AC118549.1		GO:0005634/GO:0008270/GO:0046872/GO:0005730/GO:0003677/GO:0005515/GO:0006357/GO:0000981/GO:0005671/	cellular_component/molecular_function/biological_process/	/C9J283/C9JUA4
ENSG00000197223	1	-1.22409	1.22409	-0.0399513	0.0399513	0.459775	0.00019079	ENSG00000197223	C1D nuclear receptor corepressor [Source:HGNC Symbol;Acc:HGNC:29911]	C1D		GO:0003723/GO:0005634/GO:0005737/GO:0005730/GO:0003677/GO:0005515/GO:0006915/GO:0006364/GO:0005654/GO:0000176/GO:0000460/GO:0003714/GO:0016922/GO:0045892/GO:0017053	molecular_function/cellular_component/biological_process	J3KPZ4/
ENSG00000137393	1	-1.22409	1.22409	-0.0401747	0.0401747	0.811803	5.43550951661331e-15	ENSG00000137393	ring finger protein 144B [Source:HGNC Symbol;Acc:HGNC:21578]	RNF144B		GO:0005737/GO:0016020/GO:0016021/GO:0046872/GO:0016740/GO:0016567/GO:0004842/GO:0005739/GO:0005515/GO:0006915/GO:0006511/GO:0031966/GO:0000151/GO:0061630/GO:0005829/GO:0043066/GO:0000209/GO:0031624/GO:0032436	cellular_component/molecular_function/biological_process
ENSG00000099284	1	-1.22406	1.22405	0.0409962	-0.0409875	1.43159	1.6575365028061e-20	ENSG00000099284	H2A histone family member Y2 [Source:HGNC Symbol;Acc:HGNC:14453]	H2AFY2		GO:0005634/GO:0005654/GO:0006325/GO:0003677/GO:0031490/GO:0046982/GO:0006334/GO:0000785/GO:0000786/GO:0000790/GO:0005694/GO:0000122/GO:0070062/GO:0000784/GO:0044212/GO:0007420/GO:0000977/GO:0045814/GO:0007549/GO:0045618/GO:0071169/GO:1901837/GO:0001740	cellular_component/biological_process/molecular_function	A0A024QZP6/Q5SQT3	path:hsa05034/path:hsa04217/path:hsa05322	hsa:55506	ko:K11251	Alcoholism - Homo sapiens (human)/Necroptosis - Homo sapiens (human)/Systemic lupus erythematosus - Homo sapiens (human)
ENSG00000058063	1	-1.22404	1.22404	-0.0415693	0.0415693	0.265704	0.000863937	ENSG00000058063	ATPase phospholipid transporting 11B (putative) [Source:HGNC Symbol;Acc:HGNC:13553]	ATP11B		GO:0016020/GO:0016021/GO:0046872/GO:0000166/GO:0005524/GO:0000287/GO:0005783/GO:0016787/GO:0005794/GO:0006811/GO:0006869/GO:0015914/GO:0004012/GO:0005886/GO:0005515/GO:0005768/GO:0005769/GO:0005637/GO:0034220/GO:0005802/GO:0055037/GO:0055038/GO:0043312/GO:0035577/GO:0045332/GO:0015075/GO:0015917	cellular_component/molecular_function/biological_process	/H0Y854/A0A0C4DG94/H7C4E6/H7C4W6/H0Y8C7/H7C575
ENSG00000187595	1	-1.22402	1.22402	-0.0421847	0.0421847	1.98063	1.94578678229305e-7	ENSG00000187595	zinc finger protein 385C [Source:HGNC Symbol;Acc:HGNC:33722]	ZNF385C		/GO:0003676/GO:0008270/GO:0046872/GO:0005634/GO:0005515	/molecular_function/cellular_component	C9J6X6/
ENSG00000197696	1	-1.22401	1.22401	-0.0424376	0.0424376	0.531837	2.0861e-05	ENSG00000197696	neuromedin B [Source:HGNC Symbol;Acc:HGNC:7842]	NMB		GO:0010469/GO:0005515/GO:0005576/GO:0007218/GO:0007186/GO:0007165/GO:0007267/GO:0005179/GO:0031710/GO:0007204/GO:0008284/GO:0042593/GO:0046887/GO:0046888/GO:0050482/GO:0043005	biological_process/molecular_function/cellular_component
ENSG00000061936	1	-1.224	1.224	-0.0427516	0.0427516	0.723583	3.33728625352983e-8	ENSG00000061936	splicing factor SWAP [Source:HGNC Symbol;Acc:HGNC:10790]	SFSWAP		GO:0003723/GO:0006396/GO:0006397/GO:0008380/GO:0005634/GO:0005515/GO:0048025/GO:0000395//GO:0000380	molecular_function/biological_process/cellular_component/	H0YFR9//F5H1A5
ENSG00000183607	1	-1.22399	1.22399	0.0429202	-0.0429202	4.09926	6.54389204350488e-16	ENSG00000183607	gastrokine 2 [Source:HGNC Symbol;Acc:HGNC:24588]	GKN2		GO:0005576/GO:0005615/GO:0009617/GO:0045178/	cellular_component/biological_process/	E5RHQ8/
ENSG00000142623	1	-1.22399	1.22399	0.0429757	-0.0429757	0.860814	3.8540599231781e-13	ENSG00000142623	peptidyl arginine deiminase 1 [Source:HGNC Symbol;Acc:HGNC:18367]	PADI1		GO:0005737/GO:0005829/GO:0005654/GO:0016787/GO:0005509/GO:0004668/GO:0018101/GO:0005634/GO:0036414	cellular_component/molecular_function/biological_process
ENSG00000196466	1	-1.22395	1.22395	0.0442204	-0.0442221	0.81337	0.000177322	ENSG00000196466	zinc finger protein 799 [Source:HGNC Symbol;Acc:HGNC:28071]	ZNF799		GO:0003676/GO:0005634/GO:0046872/GO:0006355/GO:0003677/GO:0005622/GO:0006357/GO:0000981/	molecular_function/cellular_component/biological_process/	/M0R0E1/D3YTF2
ENSG00000111229	1	-1.22392	1.22392	-0.0450346	0.0450346	0.371901	3.57824e-06	ENSG00000111229	actin related protein 2/3 complex subunit 3 [Source:HGNC Symbol;Acc:HGNC:706]	ARPC3		GO:0005737/GO:0016020/GO:0003779/GO:0005856/GO:0042995/GO:0005515/GO:0030833/GO:0034314/GO:0005885/GO:0005925/GO:0038096/GO:0005829/GO:0030027/GO:0070062/GO:0005200/GO:0061024/GO:0048013/GO:0015629/GO:0051015/GO:0070358/GO:1990090/GO:0031252/GO:0031941/GO:0061850	cellular_component/molecular_function/biological_process	/C9JZD1/F8VR50
ENSG00000144560	1	-1.22387	1.22388	-0.0462127	0.0462033	1.2419	1.39203938286315e-39	ENSG00000144560	vestigial like family member 4 [Source:HGNC Symbol;Acc:HGNC:28966]	VGLL4		GO:0006355/GO:0005634/GO:0005515/	biological_process/cellular_component/molecular_function/	A0A075B6E4/E7EQU6/A0A096LP98/C9JBN2/G5E9M9/E7EUJ2/F8WBN7/A0A0A6YYI5/E7EWF5/A0A1W2PQQ9/E7ERW0/G5E9M7//C9JX59/F8W708		hsa:9686
ENSG00000174130	1	-1.22385	1.22385	-0.046818	0.046818	0.704146	0.000900231	ENSG00000174130	toll like receptor 6 [Source:HGNC Symbol;Acc:HGNC:16711]	TLR6		GO:1900017/GO:0016020/GO:0016021/GO:0007165/GO:0005794/GO:0005886/GO:0005515/GO:0004888/GO:0006954/GO:0031410/GO:0045121/GO:0002376/GO:0002755/GO:0045087/GO:0050707/GO:0042802/GO:0005887/GO:0030670/GO:0034150/GO:0042496/GO:0002224/GO:0006955/GO:0005102/GO:0038023/GO:0046982/GO:0010628/GO:0035666/GO:0043032/GO:0045429/GO:0050702/GO:0051092/GO:0140052/GO:1900227/GO:1903223/GO:1903428/GO:1904646/GO:…	biological_process/cellular_component/molecular_function	D6RAV7/D6R979/
ENSG00000170633	1	-1.22383	1.22379	0.0478654	-0.0478272	0.302603	4.15785e-05	ENSG00000170633	ring finger protein 34 [Source:HGNC Symbol;Acc:HGNC:17297]	RNF34		GO:0005634/GO:0005737/GO:0016607/GO:0016020/GO:0046872/GO:0005654/GO:0016740/GO:0016567/GO:0005829/GO:0005886/GO:0005515/GO:0016604/GO:0006915/GO:0006511/GO:0061630/GO:0012505/GO:0031625/GO:0043161/GO:0070936/GO:0002039/GO:1901797/GO:2001271/GO:1902042/GO:1901981/GO:0035872/GO:2000374/GO:0004842/GO:0070417/	cellular_component/molecular_function/biological_process/	/G3V5F1/G3V4D1/A0A087WTM5/H7BYJ1/G3V566/G3V504
ENSG00000137673	1	-1.22375	1.22375	-0.0493055	0.0493055	2.28628	2.13003162003029e-25	ENSG00000137673	matrix metallopeptidase 7 [Source:HGNC Symbol;Acc:HGNC:7174]	MMP7		GO:0008270/GO:0046872/GO:0016787/GO:0005515/GO:0008233/GO:0006508/GO:0005576/GO:0004222/GO:0008237/GO:0031012/GO:0004252/GO:0070062/GO:0005615/GO:0022617/GO:0030574/GO:0008201/GO:0002779/GO:0007568/GO:0031667/GO:0044849/GO:0060135/GO:0071260/GO:0009986	molecular_function/biological_process/cellular_component
ENSG00000134086	1	-1.2237	1.2237	-0.0506207	0.0506207	1.46583	1.75475599182346e-36	ENSG00000134086	von Hippel-Lindau tumor suppressor [Source:HGNC Symbol;Acc:HGNC:12687]	VHL		GO:0005634/GO:0005737/GO:0016020/GO:0005654/GO:0005783/GO:0016567/GO:0005739/GO:0005515/GO:0045893/GO:0061630/GO:0005829/GO:0050821/GO:0043687/GO:0043066/GO:0008134/GO:0019899/GO:0045597/GO:0008285/GO:0000122/GO:0004842/GO:0006508/GO:0006355/GO:0061418/GO:0000902/GO:0010629/GO:0046426/GO:0061428/GO:0030891	cellular_component/biological_process/molecular_function	A0A0S2Z4K1/A0A024R2F2	path:hsa05211/path:hsa04120/path:hsa04066/path:hsa05200	hsa:7428	ko:K03871	Renal cell carcinoma - Homo sapiens (human)/Ubiquitin mediated proteolysis - Homo sapiens (human)/HIF-1 signaling pathway - Homo sapiens (human)/Pathways in cancer - Homo sapiens (human)
ENSG00000160182	1	-1.22367	1.22367	-0.0514003	0.0514009	2.32255	3.94354460369369e-8	ENSG00000160182	trefoil factor 1 [Source:HGNC Symbol;Acc:HGNC:11755]	TFF1		GO:0008083/GO:0010469/GO:0005515/GO:0005576/GO:0005615/GO:0030277/GO:0005975/GO:0008285/GO:0010039/GO:0030154/GO:0035902/GO:0043434	molecular_function/biological_process/cellular_component
ENSG00000130234	1	-1.22365	1.22365	-0.0518479	0.0518479	4.27772	2.3150767790531e-25	ENSG00000130234	angiotensin I converting enzyme 2 [Source:HGNC Symbol;Acc:HGNC:13557]	ACE2		GO:0005615/GO:1903779/GO:0005737/GO:0016020/GO:0016021/GO:0046872/GO:0016787/GO:0005886/GO:0008233/GO:0006508/GO:0005576/GO:0004180/GO:0009986/GO:0005515/GO:0070062/GO:0016032/GO:0008238/GO:0003081/GO:0046718/GO:0004175/GO:0001618/GO:0050727/GO:0045121/GO:0002003/GO:0008270/GO:0019229/GO:0042127/GO:1903598/GO:2000379/GO:0032800/GO:0046813/GO:0097746/GO:0004181/GO:0001817/GO:0003051/GO:0051957/GO:…	cellular_component/biological_process/molecular_function
ENSG00000109472	1	-1.22363	1.22362	-0.0523587	0.052359	3.34115	1.05386927529611e-55	ENSG00000109472	carboxypeptidase E [Source:HGNC Symbol;Acc:HGNC:2303]	CPE		GO:0008270/GO:0006508/GO:0004181/GO:0005634/GO:0016020/GO:0046872/GO:0016787/GO:0008233/GO:0005576/GO:0031410/GO:0008237/GO:0004180/GO:0007218/GO:0005615/GO:0005794/GO:0070062/GO:0030141/GO:0043025/GO:0005886/GO:0006464/GO:0097060/GO:0030658/GO:0006518/GO:0016485/GO:0050839/GO:0042043/GO:0003214/GO:0016055/GO:0030070/GO:0072657	molecular_function/biological_process/cellular_component	D6R930//C9JE88/H0YAM0/D6RF88
ENSG00000156650	1	-1.22362	1.22364	-0.0522734	0.0522528	0.609331	0.000102232	ENSG00000156650	lysine acetyltransferase 6B [Source:HGNC Symbol;Acc:HGNC:17582]	KAT6B		/GO:0005634/GO:0046872/GO:0016740/GO:0006355/GO:0006325/GO:0003677/GO:0016746/GO:0006334/GO:0000786/GO:0004402/GO:0016573/GO:0045893/GO:0042393/GO:0005515/GO:0000790/GO:0045944/GO:0005654/GO:0045892/GO:0008134/GO:0010485/GO:0043966/GO:0000123/GO:0070776/GO:0016407/GO:0043967/GO:1990830	/cellular_component/molecular_function/biological_process
ENSG00000135298	1	-1.22361	1.22361	-0.0526	0.0526	6.94991	1.02326e-05	ENSG00000135298	adhesion G protein-coupled receptor B3 [Source:HGNC Symbol;Acc:HGNC:945]	ADGRB3		GO:0005622/GO:0016020/GO:0016021/GO:0004930/GO:0007186/GO:0005886/GO:0043547/GO:0005515/GO:0007165/GO:0004888/GO:0007166/GO:0005096/GO:0005887/GO:0016525/GO:0007520/GO:0007189/GO:0098794/GO:0016322/GO:0048814/GO:0051965/GO:0061743/GO:0099558/GO:0043083	cellular_component/molecular_function/biological_process	S4R3D0/J3KMY8/S4R307/
ENSG00000054598	1	-1.22358	1.22358	0.053347	-0.053347	1.01302	2.88110283061909e-11	ENSG00000054598	forkhead box C1 [Source:HGNC Symbol;Acc:HGNC:3800]	FOXC1		GO:0045944/GO:0044212/GO:0005634/GO:0005829/GO:0005654/GO:0006355/GO:0006366/GO:0003677/GO:0003700/GO:0043565/GO:0005515/GO:0007275/GO:0001822/GO:0003713/GO:0045893/GO:0000981/GO:0030154/GO:0006357/GO:0000122/GO:0016477/GO:0008283/GO:0001228/GO:0009653/GO:0001525/GO:0008134/GO:0016525/GO:0010718/GO:0000977/GO:0070098/GO:0045930/GO:0008301/GO:0001958/GO:0042475/GO:1990841/GO:0001223/GO:0071364/GO:…	biological_process/molecular_function/cellular_component	W6CJ52		hsa:2296	ko:K09396
ENSG00000174989	1	-1.22356	1.22356	0.0537747	-0.0537747	0.538429	0.000185668	ENSG00000174989	F-box and WD repeat domain containing 8 [Source:HGNC Symbol;Acc:HGNC:13597]	FBXW8		GO:0005737/GO:0005829/GO:0016567/GO:0005794/GO:0005515/GO:0004842/GO:0048471/GO:0043687/GO:0008283/GO:0050775/GO:0007030/GO:0000209/GO:1990393/GO:0031467/GO:0060712/GO:0060716/GO:1901485/GO:0019005	cellular_component/biological_process/molecular_function
ENSG00000049323	1	-1.22355	1.22355	-0.0540472	0.0540472	1.54602	4.76937001181068e-20	ENSG00000049323	latent transforming growth factor beta binding protein 1 [Source:HGNC Symbol;Acc:HGNC:6714]	LTBP1		GO:0005509/GO:0005576/GO:0005515/GO:0044267/GO:0031012/GO:0043687/GO:0062023/GO:0005788/GO:0005201/GO:0019838/GO:0035583/GO:0001527/GO:0050431/GO:0005024/GO:0050436/GO:0003281/GO:0007178/GO:0035904/GO:0060976/GO:0032991/	molecular_function/cellular_component/biological_process/	H7C0I7/H7C2H7//E7EV71/H7C4L5/H7BZ76/C9JD84/C9JDW2
ENSG00000257594	1	-1.22355	1.22355	-0.0541231	0.0541231	0.646212	3.33022e-05	ENSG00000257594	polypeptide N-acetylgalactosaminyltransferase 4 [Source:HGNC Symbol;Acc:HGNC:4126]	GALNT4		GO:0048471/GO:0016020/GO:0016021/GO:0046872/GO:0016740/GO:0030246/GO:0016757/GO:0005794/GO:0000139/GO:0006486/GO:0070062/GO:0005975/GO:0016266/GO:0004653	cellular_component/molecular_function/biological_process
ENSG00000171109	1	-1.22347	1.22347	0.0557789	-0.0557789	0.438795	1.3980839307365e-7	ENSG00000171109	mitofusin 1 [Source:HGNC Symbol;Acc:HGNC:18262]	MFN1		GO:0005737/GO:0016020/GO:0016021/GO:0000166/GO:0016787/GO:0003924/GO:0005525/GO:0005741/GO:0005739/GO:0005515/GO:0008053/GO:0046039/GO:0016236/GO:0051646/GO:0031306/GO:0031307/GO:1990613/GO:0098799	cellular_component/molecular_function/biological_process	C9JXQ1/H7C5H5/C9JQT7/
ENSG00000163121	1	-1.22347	1.22347	0.0558319	-0.0558319	1.97109	4.32128766646307e-15	ENSG00000163121	neuralized E3 ubiquitin protein ligase 3 [Source:HGNC Symbol;Acc:HGNC:25162]	NEURL3		GO:0046872/GO:0016740/GO:0016567/GO:0061630/	molecular_function/biological_process/	/A0A087WXE0/A0A087WVI2
ENSG00000176915	1	-1.22341	1.22339	0.057348	-0.0573261	0.546774	3.36972706629491e-9	ENSG00000176915	ankyrin repeat and LEM domain containing 2 [Source:HGNC Symbol;Acc:HGNC:29101]	ANKLE2		GO:0016020/GO:0016021/GO:0005783/GO:0005789/GO:0051301/GO:0005515/GO:0007049/GO:0019888/GO:0043666/GO:0035307/GO:0051721/GO:0007084/GO:0030176/GO:0050790/GO:0043066/GO:0007417/GO:0042326	cellular_component/biological_process/molecular_function	/F5H6J0/F5H1D4
ENSG00000061918	1	-1.22339	1.22339	0.0575929	-0.0575932	4.1528	1.56545329932703e-28	ENSG00000061918	guanylate cyclase 1 soluble subunit beta 1 [Source:HGNC Symbol;Acc:HGNC:4687]	GUCY1B1	00230+4.6.1.2	GO:0005622/GO:0000166/GO:0035556/GO:0016829/GO:0020037/GO:0016849/GO:0009190/GO:0004383/GO:0006182/GO:0004016/GO:0043167/GO:0046982/GO:0047805/GO:0051879/GO:0019934/GO:0099555/GO:0008074/GO:0032991/GO:0048786/GO:0098831/GO:0098978/GO:0005737/GO:0046872/GO:0005525/GO:0005515/GO:0038023/GO:0007263/GO:0008015/GO:0071732/GO:0038060	cellular_component/molecular_function/biological_process	/D6RC99/B7Z685/E9PCN2
ENSG00000113851	1	-1.22339	1.22338	0.0577914	-0.0577826	1.45226	6.09538611873648e-45	ENSG00000113851	cereblon [Source:HGNC Symbol;Acc:HGNC:30185]	CRBN		GO:0046872/GO:0005730/GO:0005634/GO:0005737/GO:0016020/GO:0016567/GO:0005515/GO:0032463/GO:0034766/GO:0090073/GO:0043161/GO:0031464/	molecular_function/cellular_component/biological_process/	J3QT87//A0A1W2PPJ5/A0A024R2H8/A0A0D9SF49/J3QT51
ENSG00000228065	1	-1.2233	1.2233	-0.0593888	0.0593888	2.09106	5.97457191327442e-7
ENSG00000089234	1	-1.22327	1.22327	0.0600909	-0.0600909	0.442268	8.29344e-06	ENSG00000089234	BRCA1 associated protein [Source:HGNC Symbol;Acc:HGNC:1099]	BRAP		GO:0003676/GO:0005737/GO:0008270/GO:0046872/GO:0005829/GO:0016740/GO:0016567/GO:0031965/GO:0005515/GO:0004842/GO:0042802/GO:0061630/GO:0000165/GO:0009968/GO:0000151/GO:0008139/GO:0007265	molecular_function/cellular_component/biological_process	/J3KNN7
ENSG00000281332	1	-1.22325	1.22325	-0.0605688	0.0605688	1.58145	7.74106222099628e-7
ENSG00000154743	1	-1.22324	1.22323	-0.0608658	0.0608755	1.36143	1.93737890377775e-27	ENSG00000154743	tRNA splicing endonuclease subunit 2 [Source:HGNC Symbol;Acc:HGNC:28422]	TSEN2		GO:0003676/GO:0005813/GO:0005829/GO:0005654/GO:0090305/GO:0000213/GO:0004518/GO:0006388/GO:0090501/GO:0090502/GO:0000214/GO:0006397/GO:0005634/GO:0008033/GO:0016829/GO:0005515/GO:0005730/GO:0000379/GO:0004519/	molecular_function/cellular_component/biological_process/	H7C301/H7C2Z3/C9J7Z4/A0A024R2H2/
ENSG00000078674	1	-1.22319	1.22319	-0.0616449	0.0616449	0.400112	4.61917e-06	ENSG00000078674	pericentriolar material 1 [Source:HGNC Symbol;Acc:HGNC:8727]	PCM1		GO:0005737/GO:0016020/GO:0005813/GO:0005829/GO:0031965/GO:0005856/GO:0042995/GO:0005515/GO:0060271/GO:0005815/GO:0071539/GO:0034454/GO:0035869/GO:0030030/GO:0034451/GO:0000086/GO:0010389/GO:0097711/GO:0032991/GO:0007098/GO:0050768/GO:0042802/GO:0090316/GO:0000242/GO:1905515/GO:0001764/GO:0022027/GO:0031122/GO:0033365/GO:0034453/GO:0035176/GO:0035735/GO:0097150/GO:0005814/GO:0036064/GO:0045177/	cellular_component/molecular_function/biological_process/	H0YBA1/E5RGQ4/E7EV93//E9PGW9
ENSG00000023697	1	-1.22319	1.22319	0.0617306	-0.0617306	0.639766	4.04308928014319e-10	ENSG00000023697	deoxyribose-phosphate aldolase [Source:HGNC Symbol;Acc:HGNC:24269]	DERA	00030+4.1.2.4/	GO:0005634/GO:0005737/GO:0003824/GO:0016829/GO:0005576/GO:0005829/GO:0043312/GO:0004139/GO:0009264/GO:0034774/GO:1904813/GO:0006098/GO:0046386/GO:0016052/GO:0046121/	cellular_component/molecular_function/biological_process/	E9PPM8/E9PML7/E9PMH9/E9PJB9/G3V158/E9PPK3/E9PJ44/
ENSG00000086696	1	-1.22315	1.22315	0.0624572	-0.0624569	3.46073	2.72098461639015e-87	ENSG00000086696	hydroxysteroid 17-beta dehydrogenase 2 [Source:HGNC Symbol;Acc:HGNC:5211]	HSD17B2		/GO:0016020/GO:0016021/GO:0016491/GO:0055114/GO:0006629/GO:0006694/GO:0005789/GO:0004303/GO:0006703/GO:0047035/GO:0032526/GO:0047006/GO:0001701/GO:0001890	/cellular_component/molecular_function/biological_process	/H3BRZ6/H3BS44/H3BNN1/H3BQY3/H3BV42
ENSG00000171735	1	-1.22315	1.22315	0.0625306	-0.0625306	0.483941	7.2143077694024e-7	ENSG00000171735	calmodulin binding transcription activator 1 [Source:HGNC Symbol;Acc:HGNC:18806]	CAMTA1		GO:0005634/GO:0005737/GO:0005730/GO:0005829/GO:0006366/GO:0003677/GO:0000981/GO:0043565/GO:0001077/GO:0045944/GO:0035307/GO:0070886/GO:0050885//GO:0006357	cellular_component/biological_process/molecular_function/	H0YJG5/H0YJV1//H0YJK7/H0YJR7/H0YJY7/G3V297/A0A0C4DGL0
ENSG00000125999	1	-1.22313	1.22313	0.0628446	-0.0628446	5.88495	6.09355251714253e-10	ENSG00000125999	BPI fold containing family B member 1 [Source:HGNC Symbol;Acc:HGNC:16108]	BPIFB1		GO:0008289/GO:0005615/GO:0005576/GO:0002376/GO:0045087/GO:0070062/GO:0003674/GO:0034144/GO:0019730/GO:0002227	molecular_function/cellular_component/biological_process	/A2A2R0
ENSG00000174738	1	-1.22311	1.22311	-0.0631843	0.0631843	0.72182	2.1059952650303e-10	ENSG00000174738	nuclear receptor subfamily 1 group D member 2 [Source:HGNC Symbol;Acc:HGNC:7963]	NR1D2		GO:0005634/GO:0008270/GO:0046872/GO:0005654/GO:0006355/GO:0003677/GO:0003700/GO:0043565/GO:0005515/GO:0003707/GO:0006351/GO:0030522/GO:0043401/GO:0048511/GO:0045893/GO:0000977/GO:0000981/GO:0000122/GO:0030154/GO:0001078/GO:0008134/GO:0045944/GO:0090575/GO:0038023/GO:0009755/GO:0000976/GO:0000980/GO:0000987/GO:0001206/GO:0019216/GO:0042752/GO:0045892/GO:0050727/GO:0055088/GO:0097009/GO:2001014/GO:…	cellular_component/molecular_function/biological_process	F1D8P2/Q6NSM0		hsa:9975	ko:K08531
ENSG00000186854	1	-1.22304	1.22304	-0.0646283	0.0646283	0.841578	9.45365213365648e-8	ENSG00000186854	TraB domain containing 2A [Source:HGNC Symbol;Acc:HGNC:27013]	TRABD2A		GO:0016020/GO:0016021/GO:0046872/GO:0016787/GO:0005886/GO:0008233/GO:0006508/GO:0016055/GO:0008237/GO:0005887/GO:0017147/GO:0004222/GO:0030178/GO:0032461/GO:1904808/GO:0031301/GO:0004175/GO:0060322/	cellular_component/molecular_function/biological_process/	/C9IYB5
ENSG00000116209	1	-1.22304	1.22306	0.0643761	-0.0644034	0.443037	7.64574295236229e-7	ENSG00000116209	transmembrane protein 59 [Source:HGNC Symbol;Acc:HGNC:1239]	TMEM59		GO:0016020/GO:0016021/GO:0005794/GO:0005765/GO:0005886/GO:0005515/GO:0006508/GO:0000139/GO:0006914/GO:0005764/GO:0005768/GO:0031902/GO:0070062/GO:0010508/GO:0005770/GO:1903077/GO:0005797/GO:0000138/GO:0010955/GO:0000137/GO:0090285/GO:0004175/	cellular_component/molecular_function/biological_process/	Q5T703/Q5T704//Q5T706/Q5T6Z8
ENSG00000177283	1	-1.223	1.223	-0.0652742	0.0652755	0.949035	0.000179481	ENSG00000177283	frizzled class receptor 8 [Source:HGNC Symbol;Acc:HGNC:4046]	FZD8		GO:0016020/GO:0016021/GO:0005794/GO:0005886/GO:0005515/GO:0007165/GO:0004888/GO:0004930/GO:0007166/GO:0007186/GO:0007275/GO:0016055/GO:0017147/GO:0042813/GO:0060070/GO:0031625/GO:0035567/GO:0030182/GO:0030165/GO:0005102/GO:0000122/GO:0001525/GO:0001934/GO:0033077/GO:0043507/GO:0045944/GO:1990851	cellular_component/molecular_function/biological_process
ENSG00000033327	1	-1.22295	1.22295	-0.0661909	0.0661909	1.01327	2.16355966851182e-10	ENSG00000033327	GRB2 associated binding protein 2 [Source:HGNC Symbol;Acc:HGNC:14458]	GAB2		GO:0005737/GO:0016020/GO:0005886/GO:0005515/GO:0036092/GO:0048015/GO:0038095/GO:0005829/GO:0005547/GO:0043325/GO:0008284/GO:0007411/GO:0019221/GO:0016303/GO:0030316/GO:0043306/GO:0005068/GO:0007169/	cellular_component/molecular_function/biological_process/	/E9PJE2/E9PJ26
ENSG00000205978	1	-1.22291	1.22291	-0.0670031	0.0670031	1.24864	6.37594595079778e-8	ENSG00000205978	NYN domain and retroviral integrase containing [Source:HGNC Symbol;Acc:HGNC:20165]	NYNRIN		GO:0003674/GO:0008150/GO:0005575/GO:0003676/GO:0016020/GO:0016021/GO:0015074	molecular_function/biological_process/cellular_component
ENSG00000055813	1	-1.22278	1.22278	0.0694033	-0.0694033	2.39122	2.47736276691852e-27	ENSG00000055813	coiled-coil domain containing 85A [Source:HGNC Symbol;Acc:HGNC:29400]	CCDC85A
ENSG00000065526	1	-1.22275	1.22277	-0.0697216	0.0696998	0.471584	3.7081e-05	ENSG00000065526	spen family transcriptional repressor [Source:HGNC Symbol;Acc:HGNC:17575]	SPEN		GO:0003676/GO:0003723/GO:0005634/GO:0005654/GO:0003677/GO:0005515/GO:0007219/GO:0070062/GO:0016032/GO:0000122/GO:0045892/GO:0001085/GO:0003714/GO:0017053/GO:0050769	molecular_function/cellular_component/biological_process	H0Y5U7//F6WRY4
ENSG00000118849	1	-1.22272	1.22272	-0.0703184	0.0703184	1.2273	7.74702509873811e-8	ENSG00000118849	retinoic acid receptor responder 1 [Source:HGNC Symbol;Acc:HGNC:9867]	RARRES1		GO:0016020/GO:0016021/GO:0008285/GO:0070062	cellular_component/biological_process
ENSG00000171928	1	-1.22269	1.22269	0.0709225	-0.0709225	0.452717	2.89929e-05	ENSG00000171928	trans-golgi network vesicle protein 23 homolog B [Source:HGNC Symbol;Acc:HGNC:20399]	TVP23B		GO:0016020/GO:0016021/GO:0009306/GO:0016192/GO:0030173	cellular_component/biological_process	K7ENL4/J3KS67/E5RIS5/I3L376/J3QL63/
ENSG00000028203	1	-1.22259	1.22259	0.0725682	-0.0725682	0.449868	0.000381789	ENSG00000028203	vezatin adherens junctions transmembrane protein [Source:HGNC Symbol;Acc:HGNC:18258]	VEZT		GO:0005634/GO:0016020/GO:0016021/GO:0005829/GO:0005654/GO:0005886/GO:0030054/GO:0031410/GO:0098609/GO:0001669/GO:0005912/GO:0017022/	cellular_component/biological_process/molecular_function/	/F2Z3A6/F8VUB7/F8VUG0/F8VVS3/F8W088/F8VPN9/F8W8C2/F8VS43/F8W0S0/F8W048/F8VRY3/F8VXA0
ENSG00000196233	1	-1.22257	1.22257	0.0729549	-0.0729549	0.54245	0.000189228	ENSG00000196233	ligand dependent nuclear receptor corepressor [Source:HGNC Symbol;Acc:HGNC:29503]	LCOR		GO:0005634/GO:0005654/GO:0003677/GO:0005515/GO:0000981/GO:0003700/GO:0008134/GO:0000122/GO:0006357/GO:0006366/	cellular_component/molecular_function/biological_process/	/A0A1P0AZG4
ENSG00000185684	1	-1.22252	1.22249	-0.0740481	0.0740746	0.650884	3.32706e-06
ENSG00000169605	1	-1.22251	1.22251	-0.0739292	0.0739292	5.79221	8.12524768217248e-171	ENSG00000169605	gastrokine 1 [Source:HGNC Symbol;Acc:HGNC:23217]	GKN1		GO:0005576/GO:0005615/GO:0003674/GO:0005575/GO:0051781/GO:0007586	cellular_component/molecular_function/biological_process
ENSG00000184669	1	-1.22246	1.22246	0.0747971	-0.0747959	1.13294	1.1038e-05
ENSG00000132170	1	-1.22244	1.22243	0.0751294	-0.0751208	1.41279	8.19066677428199e-26	ENSG00000132170	peroxisome proliferator activated receptor gamma [Source:HGNC Symbol;Acc:HGNC:9236]	PPARG		GO:0043537/GO:1905563/GO:1904706/GO:0071404/GO:0016525/GO:0051091/GO:0006919/GO:0045944/GO:1905461/GO:0005634/GO:0055088/GO:0042953/GO:0044212/GO:0045893/GO:0032869/GO:0042593/GO:0048662/GO:0005737/GO:0043231/GO:0008270/GO:0046872/GO:0006355/GO:0003677/GO:0003700/GO:0043565/GO:0005515/GO:0003707/GO:0004879/GO:0043401/GO:0048511/GO:0030374/GO:0000977/GO:0042802/GO:0000981/GO:0000122/GO:0030154/GO:…	biological_process/cellular_component/molecular_function/	E7EU07/E9PFX5/E7EUD1//E9PFJ1/E9PFV2/E9PFV3
ENSG00000111371	1	-1.22234	1.22232	0.0768299	-0.0768114	0.632024	4.26320928054786e-12	ENSG00000111371	solute carrier family 38 member 1 [Source:HGNC Symbol;Acc:HGNC:13447]	SLC38A1		GO:0016020/GO:0016021/GO:0015293/GO:0006811/GO:0005886/GO:0003333/GO:0005515/GO:0006814/GO:0055085/GO:0005887/GO:0070062/GO:0015171/GO:0006865/GO:1903825/GO:1902475/GO:0015175/GO:0015804/GO:0001504/GO:0005283/GO:0015179/GO:0015186/GO:0006868/GO:0007565/GO:0030424/	cellular_component/molecular_function/biological_process/	A0A024R124/F8VX04/F8VX12	path:hsa04727/path:hsa04724	hsa:81539	ko:K14990	GABAergic synapse - Homo sapiens (human)/Glutamatergic synapse - Homo sapiens (human)
ENSG00000104946	1	-1.22232	1.2223	0.0772438	-0.077224	0.592916	4.39287e-05	ENSG00000104946	TBC1 domain family member 17 [Source:HGNC Symbol;Acc:HGNC:25699]	TBC1D17		GO:0015031/GO:0005829/GO:0005515/GO:0031410/GO:0006914/GO:0005096/GO:0017137/GO:0006886/GO:0090630/GO:0042147/GO:0005776/GO:0055037/	biological_process/cellular_component/molecular_function/	M0QXA2/M0R2L2/A0A087WXG5//M0QYC9
ENSG00000204172	1	-1.22223	1.22225	-0.0783048	0.0782858	0.65253	0.000322103	ENSG00000204172	ArfGAP with GTPase domain ankyrin repeat and PH domain 9 [Source:HGNC Symbol;Acc:HGNC:23463]	AGAP9		GO:0046872/GO:0005096/GO:0043547/GO:0005634	molecular_function/biological_process/cellular_component
ENSG00000134698	1	-1.22222	1.2222	0.0787051	-0.0786872	0.753782	0.000841122	ENSG00000134698	argonaute 4 RISC catalytic component [Source:HGNC Symbol;Acc:HGNC:18424]	AGO4		GO:0005737/GO:0003676/GO:0003723/GO:0016020/GO:0005829/GO:0005654/GO:0005515/GO:0016604/GO:0031047/GO:0000932/GO:0006417/GO:0045652/GO:0007223/GO:0003725/GO:0031054/GO:0035196/GO:0070578/GO:0006402/GO:0035198/GO:0035278/GO:0010629/GO:0035068/GO:0010501/GO:0035280/GO:0016442/GO:0010628/GO:0035194/GO:0003727/GO:0007130/GO:0007140/GO:0008584/GO:0010586/GO:0022604/GO:0043066/GO:0005634	cellular_component/molecular_function/biological_process
ENSG00000146859	1	-1.22215	1.22215	-0.0796152	0.0796152	1.11664	1.9661444088892e-15	ENSG00000146859	transmembrane protein 140 [Source:HGNC Symbol;Acc:HGNC:21870]	TMEM140		GO:0016020/GO:0016021/GO:0005515	cellular_component/molecular_function
ENSG00000123104	1	-1.22214	1.22215	0.0797217	-0.0797362	0.680591	0.000389586	ENSG00000123104	inositol 1 4 5-trisphosphate receptor type 2 [Source:HGNC Symbol;Acc:HGNC:6181]	ITPR2		GO:0016020/GO:0016021/GO:0055085/GO:0005634/GO:0005783/GO:0005216/GO:0006811/GO:0005789/GO:0006816/GO:0070588/GO:0005262/GO:0070679/GO:0005886/GO:0005509/GO:0035091/GO:0005220/GO:0048016/GO:0007165/GO:0030168/GO:0050796/GO:0051209/GO:1903779/GO:0031095/GO:0033017/GO:0043235/GO:0097110/GO:0030659/GO:0001666/GO:0016529/GO:0030667/GO:0015085/GO:0015278/GO:0071320/GO:0071361/GO:0005737/GO:0005938/	cellular_component/biological_process/molecular_function/	H7C2X9/F5GYT5/
ENSG00000079931	1	-1.22213	1.22213	0.0799848	-0.0799844	3.05276	7.22874425072819e-13	ENSG00000079931	monooxygenase DBH like 1 [Source:HGNC Symbol;Acc:HGNC:21063]	MOXD1		GO:0016020/GO:0016021/GO:0046872/GO:0004497/GO:0016491/GO:0055114/GO:0005783/GO:0005789/GO:0003824/GO:0005515/GO:0005507/GO:0005615/GO:0005737/GO:0016715/GO:0004500/GO:0006589/GO:0042420/GO:0042421/GO:0030667/	cellular_component/molecular_function/biological_process/	A6PVS1/
ENSG00000138764	1	-1.22213	1.22213	-0.0800577	0.0800577	0.814281	0.000459885	ENSG00000138764	cyclin G2 [Source:HGNC Symbol;Acc:HGNC:1593]	CCNG2		GO:0005737/GO:0051301/GO:0007049/GO:0051726/GO:0005634/GO:0000278/GO:0019901/GO:0008284/GO:0016538/GO:0000307/GO:0000079/GO:0007088/GO:0045787	cellular_component/biological_process/molecular_function	D6RHI3/A0A024RDC7/	path:hsa04115/path:hsa04068	hsa:901	ko:K10146	p53 signaling pathway - Homo sapiens (human)/FoxO signaling pathway - Homo sapiens (human)
ENSG00000165195	1	-1.22212	1.22213	-0.0800448	0.0800287	0.63878	0.000316871	ENSG00000165195	phosphatidylinositol glycan anchor biosynthesis class A [Source:HGNC Symbol;Acc:HGNC:8957]	PIGA	00563+2.4.1.198/	GO:0016020/GO:0016021/GO:0016740/GO:0005783/GO:0005789/GO:0016757/GO:0006506/GO:1990830/GO:0005515/GO:0016254/GO:0000506/GO:0008194/GO:0017176/GO:0009893/	cellular_component/molecular_function/biological_process/	/A0A2K4ZA02/A0A0U1RQF5/A0A0U1RRE8/A0A1B0GVE5/A0A0U1RQW8/B3KUV7/A0A1B0GU19/A0A0U1RQM9/A8K382	path:hsa01100/path:hsa00563	hsa:5277	ko:K03857	Metabolic pathways - Homo sapiens (human)/Glycosylphosphatidylinositol (GPI)-anchor biosynthesis - Homo sapiens (human)
ENSG00000074527	1	-1.22203	1.22205	0.081303	-0.0813205	0.692737	6.39052016605535e-9	ENSG00000074527	netrin 4 [Source:HGNC Symbol;Acc:HGNC:13658]	NTN4		GO:0005515/GO:0005576/GO:0005886/GO:0005604/GO:0007411/GO:0043237/GO:0016322/GO:0060668/	molecular_function/cellular_component/biological_process/	F8W0I7/
ENSG00000141338	1	-1.222	1.222	0.0819881	-0.0819878	7.96059	3.72490210253536e-9	ENSG00000141338	ATP binding cassette subfamily A member 8 [Source:HGNC Symbol;Acc:HGNC:38]	ABCA8		GO:0016020/GO:0016021/GO:0055085/GO:0000166/GO:0005524/GO:0005886/GO:0016887/GO:0042626/GO:0043231/GO:0006855/GO:0008559/GO:0006869/GO:0042908	cellular_component/biological_process/molecular_function	Q49AI9/A0A024R8L6/A0A075B774//K7ELK9/A0A0A0MSU4	path:hsa02010	hsa:10351	ko:K05650	ABC transporters - Homo sapiens (human)
ENSG00000170364	1	-1.22198	1.22198	0.0821884	-0.0821884	1.95105	5.57447078796366e-38	ENSG00000170364	SET domain and mariner transposase fusion gene [Source:HGNC Symbol;Acc:HGNC:10762]	SETMAR	00310+2.1.1.43/	GO:0005634/GO:0008270/GO:0046872/GO:0005730/GO:0008168/GO:0016740/GO:0032259/GO:0016787/GO:0006325/GO:0003677/GO:0005694/GO:0042803/GO:0008152/GO:0006281/GO:0006974/GO:0004519/GO:0004518/GO:0018024/GO:0046975/GO:0034968/GO:0003824/GO:0005515/GO:0008283/GO:0071157/GO:2001034/GO:0035861/GO:0003690/GO:0031297/GO:0006303/GO:0051568/GO:0042800/GO:2000373/GO:0003697/GO:0000793/GO:0090305/GO:0000014/GO:…	cellular_component/molecular_function/biological_process/	/B9ZVV8/F8WEU1/F8WB33
ENSG00000111144	1	-1.22198	1.22198	0.0822558	-0.0822558	0.496128	1.85065288947882e-7	ENSG00000111144	leukotriene A4 hydrolase [Source:HGNC Symbol;Acc:HGNC:6710]	LTA4H	00590+3.3.2.6/	GO:0003723/GO:0005737/GO:0008270/GO:0046872/GO:0005634/GO:0005829/GO:0005654/GO:0016787/GO:0005515/GO:0008233/GO:0006508/GO:0008237/GO:0004177/GO:0005576/GO:0004463/GO:0019370/GO:0070062/GO:0043312/GO:1904813/GO:1904724/GO:0043171/GO:0042759/GO:0044255/GO:0004301/GO:0070006/GO:0006691/GO:0044267	molecular_function/cellular_component/biological_process	B4DEH5/A0A140VK27/	path:hsa00590/path:hsa01100	hsa:4048	ko:K01254	Arachidonic acid metabolism - Homo sapiens (human)/Metabolic pathways - Homo sapiens (human)
ENSG00000166340	1	-1.22182	1.22182	0.0845348	-0.0845348	0.568497	1.31428192632074e-8	ENSG00000166340	tripeptidyl peptidase 1 [Source:HGNC Symbol;Acc:HGNC:2073]	TPP1		GO:0046872/GO:0016787/GO:0005515/GO:0008233/GO:0006508/GO:0004252/GO:0042470/GO:0008236/GO:0005764/GO:0007399/GO:0070062/GO:0004175/GO:0030855/GO:0043202/GO:0006629/GO:0036498/GO:0008240/GO:0042277/GO:0007040/GO:0030163/GO:0043171/GO:0045453/GO:0050885/	molecular_function/biological_process/cellular_component/	A0A2R8Y7U1/E9PPA4/E7EV34/A0A2R8YE64/A0A2R8YD72/A0A2R8YDY1/A0A2R8YD45/A0A2R8YGD1/A0A2R8Y7I4/A0A2R8Y6T9//A0A2R8YCK4/E9PME9
ENSG00000139218	1	-1.2218	1.22176	0.0851799	-0.0851413	0.384762	0.000128146	ENSG00000139218	SR-related CTD associated factor 11 [Source:HGNC Symbol;Acc:HGNC:10784]	SCAF11		GO:0003723/GO:0006397/GO:0008380/GO:0005634/GO:0046872/GO:0005730/GO:0005654/GO:0016604/GO:0005515/GO:0000375/GO:0000245/	molecular_function/biological_process/cellular_component/	F8W6K1/A0A0A0MTP7//A8MUK0/A0A087WTB7/F8VXG7/A0A087WUE7/A8MTP4
ENSG00000198157	1	-1.22178	1.22178	0.0851679	-0.0851679	1.05769	1.44623429030728e-10	ENSG00000198157	high mobility group nucleosome binding domain 5 [Source:HGNC Symbol;Acc:HGNC:8013]	HMGN5		GO:0003723/GO:0005634/GO:0006325/GO:0003677/GO:0031492/GO:0000785/GO:0006355/GO:0045893/GO:0003682/GO:0010628/GO:0043066/GO:0008284/GO:0071157	molecular_function/cellular_component/biological_process	Q5JSK7/Q5JSK9//Q5JSK8/Q5JSK6/Q5JSL0
ENSG00000170017	1	-1.22177	1.22175	0.0854231	-0.0854073	0.818388	4.39731573838008e-45	ENSG00000170017	activated leukocyte cell adhesion molecule [Source:HGNC Symbol;Acc:HGNC:400]	ALCAM		GO:0016020/GO:0016021/GO:0007155/GO:0005886/GO:0042995/GO:0005515/GO:0005576/GO:0002376/GO:0005925/GO:0030425/GO:0002250/GO:0042802/GO:0005887/GO:0030424/GO:0070062/GO:0007165/GO:0031226/GO:0005102/GO:0001772/GO:0048846/GO:0031290/GO:0007157/GO:0042101/GO:1990138/GO:0007411/GO:0008045/GO:0009897/GO:0043025	cellular_component/biological_process/molecular_function	/F5GXJ9/H7C543
ENSG00000164066	1	-1.22169	1.22169	0.0865	-0.0864969	0.850341	1.2326e-05	ENSG00000164066	inturned planar cell polarity protein [Source:HGNC Symbol;Acc:HGNC:29239]	INTU		GO:0060271/GO:0001736/GO:0005737/GO:0031514/GO:0005856/GO:0042995/GO:0005515/GO:0007275/GO:0009986/GO:0007399/GO:0036064/GO:0030030/GO:0060173/GO:0008589/GO:0010839/GO:0021513/GO:0021915/GO:0030216/GO:0030278/GO:0031069/GO:0042733/GO:0044458/GO:0045880/GO:0051782/GO:1905515/	biological_process/cellular_component/molecular_function/	H0YAI1/J3QTA5//H0YA54
ENSG00000204149	1	-1.22167	1.22167	-0.0866939	0.0866939	0.60858	2.74984e-06	ENSG00000204149	ArfGAP with GTPase domain ankyrin repeat and PH domain 6 [Source:HGNC Symbol;Acc:HGNC:23466]	AGAP6		GO:0046872/GO:0005096/GO:0043547/GO:0005634	molecular_function/biological_process/cellular_component	A0A087X0I8/
ENSG00000258064	1	-1.22166	1.22166	0.0869142	-0.0869142	0.921771	7.16642e-06	ENSG00000258064	novel transcript	AC073612.1		GO:0003676/GO:0003677/GO:0005730	molecular_function/cellular_component	F8VRH5
ENSG00000112305	1	-1.22158	1.22158	-0.0880011	0.0880011	0.372747	0.000134409	ENSG00000112305	small ArfGAP 1 [Source:HGNC Symbol;Acc:HGNC:19651]	SMAP1		GO:0016020/GO:0046872/GO:0005886/GO:0005096/GO:0043547/GO:2000369/GO:0030276/GO:0045648/GO:0005737/	cellular_component/molecular_function/biological_process/	/Q5T6I8/A0A087X1X9/H0Y5G0
ENSG00000206562	1	-1.22157	1.22157	-0.0880972	0.0880972	0.936262	3.97249598791913e-11	ENSG00000206562	methyltransferase like 6 [Source:HGNC Symbol;Acc:HGNC:28343]	METTL6		GO:0008168/GO:0016740/GO:0032259/	molecular_function/biological_process/	M0R0W0/B4DDX3//H7C3H9/H7C1L4
ENSG00000066084	1	-1.22155	1.22158	0.0882385	-0.0882676	0.409203	1.66789e-05	ENSG00000066084	disco interacting protein 2 homolog B [Source:HGNC Symbol;Acc:HGNC:29284]	DIP2B		GO:0005634/GO:0005737/GO:0016020/GO:0003824/GO:0070062/GO:0003674/GO:0008150/	cellular_component/molecular_function/biological_process/	H0YIU5/
ENSG00000090238	1	-1.22154	1.22154	0.0884849	-0.0884849	0.950629	0.00045537	ENSG00000090238	yippee like 3 [Source:HGNC Symbol;Acc:HGNC:18327]	YPEL3		/GO:0005634/GO:0046872/GO:0005730/GO:2000774	/cellular_component/molecular_function/biological_process	/H3BRF0/H3BNP5/A0A0B4J290/A0A024R624/H3BUE2/H3BME7		hsa:83719
ENSG00000171056	1	-1.22151	1.22151	0.0889116	-0.0889116	1.5606	2.96865266543928e-135	ENSG00000171056	SRY-box 7 [Source:HGNC Symbol;Acc:HGNC:18196]	SOX7		GO:0044212/GO:0005634/GO:0005737/GO:0003677/GO:0003700/GO:0005515/GO:0000981/GO:0000122/GO:0006355/GO:0030154/GO:0044798/GO:0005654/GO:0008285/GO:0045892/GO:0043280/GO:0060828/GO:0001706/GO:0003705/GO:0043565/GO:0006357/GO:0045893	molecular_function/cellular_component/biological_process
ENSG00000163719	1	-1.22149	1.22149	-0.089273	0.089273	1.44718	5.22191674505131e-59	ENSG00000163719	myotubularin related protein 14 [Source:HGNC Symbol;Acc:HGNC:26190]	MTMR14		GO:0005737/GO:0016787/GO:0005515/GO:0004725/GO:0016311/GO:0035335/GO:0048471/GO:0006470/GO:0005829/GO:0001726/GO:0006661/GO:0004722/GO:0004438/GO:0052629/GO:0016236/	cellular_component/molecular_function/biological_process/	B4DQK9//C9JR61/F8WBT3/C9JSR1/B4DJ23/F8WCG0/F8WEA3/F8WCC0
ENSG00000169031	1	-1.22146	1.22146	-0.0896901	0.0896901	2.93091	1.08971e-06	ENSG00000169031	collagen type IV alpha 3 chain [Source:HGNC Symbol;Acc:HGNC:2204]	COL4A3		GO:0043231/GO:0005783/GO:0007155/GO:0010951/GO:0005576/GO:0005581/GO:0005201/GO:0005615/GO:0005515/GO:0005604/GO:0008283/GO:0030198/GO:0031012/GO:0030020/GO:0062023/GO:0005178/GO:0005788/GO:0005198/GO:0016525/GO:0008285/GO:0006919/GO:0007605/GO:0032836/GO:0008015/GO:0007166/GO:0008191/GO:0005587/GO:0009749/GO:0038063/GO:0072577/	cellular_component/biological_process/molecular_function/	H7BXM4/A0A2R8Y2F0//A0A2R8Y6E5
ENSG00000177565	1	-1.22139	1.22139	-0.0905849	0.0905849	0.17383	0.000429809	ENSG00000177565	transducin beta like 1 X-linked receptor 1 [Source:HGNC Symbol;Acc:HGNC:29529]	TBL1XR1		GO:0044212/GO:0005634/GO:0006325/GO:0005515/GO:0045893/GO:0006357/GO:0003714/GO:0000122/GO:0045944/GO:0005654/GO:0000118/GO:0090263/GO:0047485/GO:0042393/GO:0043161/GO:0008013/GO:0019216/GO:0017053/GO:0072686/GO:0016575/GO:0003677/GO:0002021/GO:0010468/GO:0016042/GO:0035264/GO:0045892/GO:0050872/GO:0060612/GO:0060613/GO:0090207/	molecular_function/cellular_component/biological_process/	C9J3H2/A0A0D9SFS8/A0A0D9SFI2/C9JCK0/A0A0D9SEW5/C9JY82/C9JLJ1/F8W9D8/C9JBN1/A0A0D9SF63/C9JCW4/A0A1B0GUU2/A0A1B0GVH3/C9JTW8/C9J7E1/C9J903//C9IYU9/C9JEC9/A0A0D9SF25
ENSG00000112144	1	-1.22138	1.22137	-0.0907776	0.0907969	0.638838	1.42030991978159e-8	ENSG00000112144	intestinal cell kinase [Source:HGNC Symbol;Acc:HGNC:21219]	ICK		GO:0005634/GO:0005737/GO:0046872/GO:0000166/GO:0004672/GO:0004674/GO:0005524/GO:0006468/GO:0016740/GO:0016301/GO:0016310/GO:0001650/GO:0005829/GO:0005856/GO:0042995/GO:0005515/GO:0007165/GO:0007275/GO:0000287/GO:0035556/GO:0060271/GO:0005929/GO:0036064/GO:0042073/GO:0030030/GO:0097546/GO:0010468/GO:0097542/GO:0035721/GO:0035720	cellular_component/molecular_function/biological_process	A0A024RD59		hsa:22858	ko:K08828
ENSG00000144455	1	-1.22137	1.22137	-0.0908717	0.0908717	1.53307	5.14663883503373e-83	ENSG00000144455	sulfatase modifying factor 1 [Source:HGNC Symbol;Acc:HGNC:20376]	SUMF1		/GO:0046872/GO:0016491/GO:0055114/GO:0005783/GO:0043687/GO:0005788/GO:0006687/GO:0018158/GO:0042803/GO:0120147/GO:1903135	/molecular_function/biological_process/cellular_component	F5GXA0/E9PF05/
ENSG00000054983	1	-1.22125	1.22125	-0.092436	0.092436	0.509083	0.000768015	ENSG00000054983	galactosylceramidase [Source:HGNC Symbol;Acc:HGNC:4115]	GALC	/00600+3.2.1.46	GO:0004336/GO:0006683/GO:0016787/GO:0003824/GO:0006629/GO:0016042/GO:0016798/GO:0008152/GO:0005764/GO:0006665/GO:0043202/GO:0006687/	molecular_function/biological_process/cellular_component/	A0A087WX10//G3V4M2/G3V5E8/A0A0A0MQV0/G3V255/H0YJG8/H0YJV6	path:hsa04142/path:hsa01100/path:hsa00600	hsa:2581	ko:K01202	Lysosome - Homo sapiens (human)/Metabolic pathways - Homo sapiens (human)/Sphingolipid metabolism - Homo sapiens (human)
ENSG00000169429	1	-1.22117	1.22117	-0.0934985	0.0934985	2.15377	0.000105948	ENSG00000169429	C-X-C motif chemokine ligand 8 [Source:HGNC Symbol;Acc:HGNC:6025]	CXCL8		GO:0005622/GO:0071222/GO:0010469/GO:0005576/GO:0005515/GO:0006955/GO:0006935/GO:0005125/GO:0006954/GO:0005615/GO:0008009/GO:0006952/GO:0005153/GO:0030593/GO:0042119/GO:0070098/GO:0007050/GO:0071347/GO:0071356/GO:0007186/GO:0001525/GO:0007165/GO:0019221/GO:0034976/GO:0030155/GO:0035556/GO:0090023/GO:0008285/GO:0030595/GO:0061844/GO:0044344/GO:0019722/GO:0045744/GO:0050930/GO:0031623/GO:0048566/GO:…	cellular_component/biological_process/molecular_function	C9J4T6/A0A024RDA5	path:hsa05131/path:hsa05142/path:hsa04064/path:hsa05133/path:hsa05202/path:hsa04933/path:hsa05200/path:hsa05164/path:hsa05146/path:hsa05135/path:hsa04061/path:hsa04620/path:hsa05120/path:hsa05132/path:hsa05130/path:hsa04621/path:hsa05219/path:hsa04060/path:hsa05144/path:hsa05161/path:hsa04072/path:hsa05323/path:hsa05163/path:hsa04622/path:hsa04218/path:hsa05134/path:hsa05167/path:hsa04657/path:hs…	hsa:3576	ko:K10030	Shigellosis - Homo sapiens (human)/Chagas disease (American trypanosomiasis) - Homo sapiens (human)/NF-kappa B signaling pathway - Homo sapiens (human)/Pertussis - Homo sapiens (human)/Transcriptional misregulation in cancer - Homo sapiens (human)/AGE-RAGE signaling pathway in diabetic complications - Homo sapiens (human)/Pathways in cancer - Homo sapiens (human)/Influenza A - Homo sapiens (human…
ENSG00000114279	1	-1.22094	1.22094	0.0964716	-0.0964716	2.57767	2.48261206908643e-8	ENSG00000114279	fibroblast growth factor 12 [Source:HGNC Symbol;Acc:HGNC:3668]	FGF12		GO:0005634/GO:0008083/GO:0010469/GO:0005515/GO:0008543/GO:0007399/GO:0017080/GO:0044325/GO:2000649/GO:0007165/GO:0007267/GO:0005615/GO:0086002/GO:0007507/GO:1902305/GO:0098908/GO:1905150/GO:0003254/GO:0007268/GO:0008344/GO:0010765/GO:0050905/GO:2001258	cellular_component/molecular_function/biological_process	C9JIN3/C9JEN8//C9JUK8
ENSG00000111540	1	-1.22093	1.22093	-0.0965292	0.0965292	0.671544	8.19944e-05	ENSG00000111540	RAB5B member RAS oncogene family [Source:HGNC Symbol;Acc:HGNC:9784]	RAB5B		GO:0016020/GO:0015031/GO:0043231/GO:0000166/GO:0003924/GO:0005525/GO:0005886/GO:0005515/GO:0042470/GO:0006886/GO:0005768/GO:0070062/GO:0031901/GO:0032482/GO:0043312/GO:0030100/GO:0005769/GO:0030139/GO:0019003/GO:0030667/GO:0030742/GO:0005622/GO:0019882/GO:0048227/GO:0007032/GO:0098993	cellular_component/biological_process/molecular_function	A0A024RB09/F8VPW9//F8VWZ7/F8VVZ0/F8VUA5	path:hsa04014/path:hsa04962/path:hsa04144/path:hsa05132/path:hsa04145/path:hsa05146/path:hsa05152	hsa:5869	ko:K07888	Ras signaling pathway - Homo sapiens (human)/Vasopressin-regulated water reabsorption - Homo sapiens (human)/Endocytosis - Homo sapiens (human)/Salmonella infection - Homo sapiens (human)/Phagosome - Homo sapiens (human)/Amoebiasis - Homo sapiens (human)/Tuberculosis - Homo sapiens (human)
ENSG00000086544	1	-1.22075	1.22075	-0.0988344	0.0988344	0.492411	5.20646e-06	ENSG00000086544	inositol-trisphosphate 3-kinase C [Source:HGNC Symbol;Acc:HGNC:14897]	ITPKC		GO:0005634/GO:0005737/GO:0016607/GO:0000166/GO:0005524/GO:0016740/GO:0016301/GO:0016310/GO:0008440/GO:0032958/GO:0005516/GO:0005829/GO:0043647	cellular_component/molecular_function/biological_process	A0A024R0N8/M0R2L7	path:hsa01100/path:hsa00562/path:hsa04070/path:hsa04020	hsa:80271	ko:K00911	Metabolic pathways - Homo sapiens (human)/Inositol phosphate metabolism - Homo sapiens (human)/Phosphatidylinositol signaling system - Homo sapiens (human)/Calcium signaling pathway - Homo sapiens (human)
ENSG00000155008	1	-1.22052	1.22052	-0.101599	0.101599	0.526042	1.10936e-05	ENSG00000155008	apolipoprotein O like [Source:HGNC Symbol;Acc:HGNC:24009]	APOOL		GO:0016020/GO:0016021/GO:0005739/GO:0005743/GO:0005515/GO:0005576/GO:0061617/GO:0042407/GO:0002576/GO:0031093	cellular_component/molecular_function/biological_process	A0A087WYF7/A0A087WUX8/
ENSG00000151224	1	-1.22051	1.22051	0.101817	-0.101817	4.02902	1.10987955672107e-7	ENSG00000151224	methionine adenosyltransferase 1A [Source:HGNC Symbol;Acc:HGNC:6903]	MAT1A	00270+2.5.1.6	GO:0046872/GO:0000166/GO:0005524/GO:0016740/GO:0006730/GO:0042802/GO:0005829/GO:0006556/GO:0004478/GO:0051289/GO:0032259/GO:0000096/GO:0098601/GO:0001887/GO:0009087	molecular_function/biological_process/cellular_component	/B1ANE6
ENSG00000169814	1	-1.2205	1.2205	-0.101912	0.101912	1.23386	4.65601388065436e-14	ENSG00000169814	biotinidase [Source:HGNC Symbol;Acc:HGNC:1122]	BTD		GO:0016787/GO:0006807/GO:0005576/GO:0005615/GO:0016811/GO:0070062/GO:0005759/GO:0007417/GO:0006768/GO:0047708	molecular_function/biological_process/cellular_component	C9J387/C9JSN9//F8WCU5/A0A2R8Y5J9
ENSG00000100485	1	-1.22045	1.22045	-0.102434	0.102434	0.72112	5.64413e-06	ENSG00000100485	SOS Ras/Rho guanine nucleotide exchange factor 2 [Source:HGNC Symbol;Acc:HGNC:11188]	SOS2		GO:0003677/GO:0007264/GO:0046982/GO:0000786/GO:0005085/GO:0005089/GO:0035023/GO:0005515/GO:0005829/GO:0051056/GO:0007186/GO:0043065/GO:0051057/	molecular_function/biological_process/cellular_component/	A0A087X277//G3V5W3
ENSG00000257949	1	-1.22028	1.22031	-0.104295	0.10427	0.496025	0.000309629	ENSG00000257949	TEN1 CST complex subunit [Source:HGNC Symbol;Acc:HGNC:37242]	TEN1		GO:0005634/GO:0003677/GO:0005694/GO:0005515/GO:0003697/GO:0000781/GO:1990879/GO:0042162/GO:0032211/GO:0000784/GO:0016233/GO:0010521	cellular_component/molecular_function/biological_process	/K7EJS2/K7EIL0/K7EL09
ENSG00000268006	1	-1.22028	1.22031	-0.104277	0.104247	0.413186	0.000393201
ENSG00000114948	1	-1.22028	1.22028	-0.104523	0.104524	1.38496	5.19002499923213e-7	ENSG00000114948	ADAM metallopeptidase domain 23 [Source:HGNC Symbol;Acc:HGNC:202]	ADAM23		GO:0016020/GO:0016021/GO:0007155/GO:0005886/GO:0006508/GO:0005576/GO:0004222/GO:0008237/GO:1990830/GO:0005887/GO:0007417/GO:0005178/GO:0005515/	cellular_component/biological_process/molecular_function/	H7C2M6/E7EWD3/A0A024R3W8		hsa:8745	ko:K06837
ENSG00000138131	1	-1.22009	1.22009	-0.106692	0.106692	4.06271	3.42225602849778e-160	ENSG00000138131	lysyl oxidase like 4 [Source:HGNC Symbol;Acc:HGNC:17171]	LOXL4		GO:0016020/GO:0046872/GO:0016491/GO:0055114/GO:0005515/GO:0005576/GO:0005044/GO:0006898/GO:0005615/GO:0005507/GO:0070062/GO:0016641/GO:0030199/GO:0043235/GO:0004720/GO:0018057	cellular_component/molecular_function/biological_process
ENSG00000111711	1	-1.22007	1.2201	0.106725	-0.106751	0.530046	1.8426961381869e-9	ENSG00000111711	golgi transport 1B [Source:HGNC Symbol;Acc:HGNC:20175]	GOLT1B		GO:0016020/GO:0016021/GO:0016192/GO:0015031/GO:0005794/GO:0000139/GO:0005783/GO:0043123	cellular_component/biological_process	G3V1U5/F5GXH6/F5H6U7/F5GWD8/
ENSG00000162929	1	-1.21998	1.21998	0.10788	-0.10788	0.579057	0.000254734	ENSG00000162929	KIAA1841 [Source:HGNC Symbol;Acc:HGNC:29387]	KIAA1841		GO:0003677/	molecular_function/	F8VWD7/
ENSG00000196639	1	-1.21995	1.21995	-0.108318	0.108318	1.21524	6.07182727487591e-44	ENSG00000196639	histamine receptor H1 [Source:HGNC Symbol;Acc:HGNC:5182]	HRH1		GO:0016020/GO:0016021/GO:0004930/GO:0007186/GO:0005829/GO:0005886/GO:0007165/GO:0007268/GO:0004969/GO:0098664/GO:0005887/GO:0045907/GO:0030425/GO:0006954/GO:0004993/GO:0030594/GO:0007187/GO:0071420/GO:0048016/GO:0032962/GO:0007200/GO:0043114/GO:0048245//GO:0007613/GO:0008542/GO:0048167	cellular_component/molecular_function/biological_process/	/C9J2E6
ENSG00000231210	1	-1.21995	1.21995	0.108321	-0.108322	3.09783	3.45053734869781e-23
ENSG00000164379	1	-1.21994	1.21994	-0.108373	0.108373	1.40937	1.50433941695519e-17	ENSG00000164379	forkhead box Q1 [Source:HGNC Symbol;Acc:HGNC:20951]	FOXQ1		GO:0005634/GO:0006355/GO:0003677/GO:0003700/GO:0043565/GO:0000981/GO:0030154/GO:0006357/GO:0009653/GO:0000978/GO:0001078/GO:0000122/GO:0031069	cellular_component/biological_process/molecular_function
ENSG00000280032	1	-1.21992	1.21992	0.108649	-0.108649	1.59485	0.000219897
ENSG00000109756	1	-1.21972	1.21972	-0.110824	0.110824	0.424039	0.000113351	ENSG00000109756	Rap guanine nucleotide exchange factor 2 [Source:HGNC Symbol;Acc:HGNC:16854]	RAPGEF2		GO:0005622/GO:0007165/GO:0007264/GO:0005085/GO:0005096/GO:0043547/GO:0017034/GO:0042127/GO:0005737/GO:0016020/GO:0005829/GO:0005886/GO:0005515/GO:0007186/GO:0030552/GO:0007275/GO:0048471/GO:0030054/GO:0045202/GO:0030154/GO:0007218/GO:0005509/GO:0007399/GO:0005887/GO:0005923/GO:0005768/GO:2001224/GO:0008285/GO:0032991/GO:0005770/GO:0016324/GO:0043005/GO:0070374/GO:2000670/GO:0000165/GO:0032092/GO:…	cellular_component/biological_process/molecular_function/	A0A2R8Y661/H0Y905/H0YAJ8//D6RAK0/H0Y8N8/A0A2R8YGD3/D6REY8/D6RC78/H0Y8H7/H0Y8T6
ENSG00000134109	1	-1.21969	1.21969	0.111107	-0.111107	1.25298	5.42711107683219e-45	ENSG00000134109	ER degradation enhancing alpha-mannosidase like protein 1 [Source:HGNC Symbol;Acc:HGNC:18967]	EDEM1	/00513+3.2.1.113/00510+3.2.1.113	GO:0016020/GO:0016787/GO:0005509/GO:0003824/GO:0016798/GO:0008152/GO:0004571/GO:0016021/GO:0005783/GO:0005789/GO:0016235/GO:0030433/GO:0036510/GO:1904154/GO:0030176/GO:0044322/GO:0005515/GO:0006986/GO:0036498/GO:0051787/GO:0097466/GO:1904382/	cellular_component/molecular_function/biological_process/	/F8WE67/F8WER9/A0A024R2D5	path:hsa04141	hsa:9695	ko:K10084	Protein processing in endoplasmic reticulum - Homo sapiens (human)
ENSG00000268089	1	-1.21958	1.21958	-0.112407	0.112407	5.41446	3.27129284645814e-7	ENSG00000268089	gamma-aminobutyric acid type A receptor theta subunit [Source:HGNC Symbol;Acc:HGNC:14454]	GABRQ		GO:0016020/GO:0016021/GO:0005216/GO:0006811/GO:0005886/GO:0004888/GO:0030054/GO:0045202/GO:0045211/GO:0005254/GO:0006821/GO:0034707/GO:1902476/GO:0004890/GO:0005230/GO:0034220/GO:0007268/GO:0043005/GO:0007165/GO:0005887/GO:0042391/GO:0050877/GO:1902711/GO:0043235/GO:0006836/GO:0005326	cellular_component/molecular_function/biological_process
ENSG00000274750	1	-1.21951	1.21951	-0.113143	0.113143	1.26924	2.9737378574124e-7	ENSG00000274750	histone cluster 1 H3 family member e [Source:HGNC Symbol;Acc:HGNC:4769]	HIST1H3E		GO:0005634/GO:0016020/GO:0003677/GO:0046982/GO:0006334/GO:0000786/GO:0005694/GO:0005515/GO:0005576/GO:0005654/GO:0045296/GO:0070062/GO:0044267/GO:0032991/GO:0007596/GO:0038111/GO:0045652/GO:0006335/GO:0000228/GO:0060964/GO:0000183/GO:0045814/GO:0051290/GO:0031492/GO:0000788/GO:0006325/GO:0032200/GO:0060968	cellular_component/molecular_function/biological_process
ENSG00000116977	1	-1.21951	1.21951	0.113157	-0.113157	0.681832	1.51300595415436e-23	ENSG00000116977	galectin 8 [Source:HGNC Symbol;Acc:HGNC:6569]	LGALS8		GO:0030246/GO:0005737/GO:0016020/GO:0005829/GO:0005515/GO:0031410/GO:0006914/GO:0098586/GO:0005178/GO:0098792/GO:1904977/GO:0005615/	molecular_function/cellular_component/biological_process/	H7BXD8/E9PPL1//E9PRN3/E9PNC2/E9PPM4/E9PN19/F6V2D4/E9PJ77/Q5T3P9/B1ANM0
ENSG00000111653	1	-1.21939	1.2194	-0.114353	0.114351	0.721755	0.000360321	ENSG00000111653	inhibitor of growth family member 4 [Source:HGNC Symbol;Acc:HGNC:19423]	ING4		GO:0005634/GO:0046872/GO:0005829/GO:0006325/GO:0045111/GO:0005515/GO:1903508/GO:0007049/GO:0006915/GO:0006260/GO:0016573/GO:0008285/GO:0003713/GO:0035064/GO:0043065/GO:0005654/GO:0007050/GO:0045892/GO:0043981/GO:0043982/GO:0000123/GO:0045926/GO:0006473/GO:0043966/GO:0043983/GO:0006978/	cellular_component/molecular_function/biological_process/	H0YEH7/E9PNE3/A4KYM5//E9PJ14/R4GNG1
ENSG00000172716	1	-1.21925	1.21925	-0.115863	0.115863	2.03567	4.35300522855911e-47	ENSG00000172716	schlafen family member 11 [Source:HGNC Symbol;Acc:HGNC:26633]	SLFN11		GO:0003723/GO:0005634/GO:0000166/GO:0005524/GO:0005829/GO:0005654/GO:0016787/GO:0004386/GO:0005694/GO:0016235/GO:0006974/GO:0051607/GO:0000049/GO:0002376/GO:2000134/GO:0005515/GO:0016887/GO:0010942/GO:0008156/GO:0090734/GO:0043111	molecular_function/cellular_component/biological_process	C9JDG6/C9J902/K7EIM3/K7EJJ3/K7EKT7/K7ES87/K7ER38/C9JUT2/
ENSG00000141738	1	-1.21919	1.21919	-0.116466	0.116466	1.00663	2.3576e-05	ENSG00000141738	growth factor receptor bound protein 7 [Source:HGNC Symbol;Acc:HGNC:4567]	GRB7		GO:0007165/GO:0009967/GO:0005070/GO:0003723/GO:0005737/GO:0016020/GO:0005829/GO:0005886/GO:0042995/GO:0005515/GO:0030054/GO:0005925/GO:0008289/GO:0050900/GO:0042802/GO:0035091/GO:0019901/GO:0030335/GO:0017148/GO:0010494/GO:0007411/GO:0034063/GO:0038128/GO:0007173/	biological_process/molecular_function/cellular_component/	J3QL76//J3QKK7/A0A0S2Z4F6		hsa:2886	ko:K23695
ENSG00000100360	1	-1.21911	1.21911	0.117381	-0.117381	0.864147	2.074e-05	ENSG00000100360	intraflagellar transport 27 [Source:HGNC Symbol;Acc:HGNC:18626]	IFT27		GO:0006886/GO:0015031/GO:0000166/GO:0003924/GO:0005525/GO:0042995/GO:0005515/GO:0042073/GO:0005929/GO:0007224/GO:0035735/GO:0030992/GO:0097542/GO:0032482/GO:0031514/GO:0060122/GO:0090102/GO:0005813/GO:0097225/GO:0097228	biological_process/molecular_function/cellular_component	B1AH58/F5GZ09//H0Y6C7/B1AH56
ENSG00000170876	1	-1.21906	1.21906	-0.117918	0.117918	0.71493	1.17995211019334e-15	ENSG00000170876	transmembrane protein 43 [Source:HGNC Symbol;Acc:HGNC:28472]	TMEM43		GO:0005634/GO:0016020/GO:0016021/GO:0005783/GO:0005515/GO:0043621/GO:0071763/GO:0005637/GO:0005639/GO:0005788/GO:0005794/	cellular_component/molecular_function/biological_process/	F8WDL3/A0A024R2F9		hsa:79188
ENSG00000155893	1	-1.21904	1.21904	-0.118045	0.118045	1.14871	1.48339596442379e-8	ENSG00000155893	2-phosphoxylose phosphatase 1 [Source:HGNC Symbol;Acc:HGNC:26303]	PXYLP1		/GO:0016020/GO:0016021/GO:0016787/GO:0005794/GO:0016311/GO:0000139/GO:0005515/GO:0016791/GO:0006024/GO:0050650/GO:0010909	/cellular_component/molecular_function/biological_process	D6R928/A0A1B0GUH7/D6RE60/D6RGE3//D6RDP0/B7Z3R9/A0A1B0GWB5/E9PDB7/B7Z4T2
ENSG00000148444	1	-1.21886	1.21886	0.119949	-0.119949	0.600965	1.03986e-05	ENSG00000148444	COMM domain containing 3 [Source:HGNC Symbol;Acc:HGNC:23332]	COMMD3		GO:0005634/GO:0005737/GO:0006811/GO:0005515/GO:0006814/GO:0005576/GO:0043312/GO:1904813	cellular_component/biological_process/molecular_function	/H0Y4E5/H0Y6Z9/R4GN06/R4GNF2/H0Y4W0
ENSG00000148737	1	-1.21878	1.21878	-0.120714	0.120714	0.621983	5.98739e-05	ENSG00000148737	transcription factor 7 like 2 [Source:HGNC Symbol;Acc:HGNC:11641]	TCF7L2		GO:0009749/GO:0051897/GO:0043433/GO:0045944/GO:0005634/GO:0042593/GO:0008013/GO:0060070/GO:0006357/GO:0003677/GO:0005515/GO:0016055/GO:0043565/GO:0006355/GO:0003700/GO:0000981/GO:0005654/GO:0019901/GO:0090090/GO:0070016/GO:0005667/GO:0003682/GO:0032024/GO:0044212/GO:0000122/GO:0045892/GO:1904837/GO:0000790/GO:0016605/GO:0032092/GO:0001103/GO:0000978/GO:0007223/GO:0045444/GO:0008134/GO:2000675/GO:…	biological_process/cellular_component/molecular_function/	A0A1B0GU84/Q5JRY3/H0YEE5/C6ZRJ6/Q5JRY4/A0A0A0MTL7//A0A0D9SGH8/E2GH26/Q6FHW4/Q5JRY5/C6ZRK5/A0A1B0GUV5/A0A1B0GVE1/C6ZRJ7/Q5VVR5/Q5VVR7/Q5VVR8
ENSG00000172661	1	-1.21878	1.21878	0.120773	-0.120773	0.68851	2.43395497195922e-7	ENSG00000172661	WASH complex subunit 2C [Source:HGNC Symbol;Acc:HGNC:23414]	WASHC2C		GO:0016020/GO:0015031/GO:0043231/GO:0005730/GO:0005829/GO:0005886/GO:0008289/GO:0071203/GO:0005515/GO:0005768/GO:0005769/GO:0010314/GO:0032266/GO:0080025/GO:0031901/GO:0042147/GO:1990126/GO:0005546/GO:0005547/GO:0043325/GO:0030904/GO:0070273/GO:1905394/GO:1900024/GO:2000813	cellular_component/biological_process/molecular_function	J3KP36/A0A0A0MR88//A0A096LPC5/A0A0A0MT65
ENSG00000104213	1	-1.21868	1.21868	0.121761	-0.121761	1.31667	0.000637468	ENSG00000104213	platelet derived growth factor receptor like [Source:HGNC Symbol;Acc:HGNC:8805]	PDGFRL		GO:0005576/GO:0007186/GO:0008150/GO:0005575/GO:0004992/GO:0005019/GO:0035791	cellular_component/biological_process/molecular_function
ENSG00000113319	1	-1.21864	1.21864	-0.122159	0.122159	0.973671	8.54957895229603e-7	ENSG00000113319	Ras protein specific guanine nucleotide releasing factor 2 [Source:HGNC Symbol;Acc:HGNC:9876]	RASGRF2		GO:0005737/GO:0016020/GO:0005783/GO:0005789/GO:0007264/GO:0005886/GO:0005085/GO:0005089/GO:0035023/GO:0005516/GO:0046578/GO:0005829/GO:0051056/GO:0007186/GO:0005088/GO:0000165/GO:0034976/GO:0043065/GO:0005622	cellular_component/biological_process/molecular_function	/D6RAS9/A0A1W2PP99
ENSG00000185950	1	-1.21858	1.21857	-0.122753	0.122764	1.09919	0.00018655	ENSG00000185950	insulin receptor substrate 2 [Source:HGNC Symbol;Acc:HGNC:6126]	IRS2		GO:0008284/GO:0046326/GO:0009749/GO:0055088/GO:0032869/GO:0005737/GO:0005829/GO:0005515/GO:0007165/GO:0005158/GO:0008286/GO:0036092/GO:0005886/GO:0046854/GO:0032024/GO:0046934/GO:0007411/GO:0051897/GO:0005088/GO:0000165/GO:0016303/GO:0048015/GO:0038111/GO:0043548/GO:0045725/GO:0030890/GO:0010748/GO:0006006/GO:0010907/GO:0032000/GO:0019216/GO:0019901/GO:0019903/GO:0019904/GO:0071889/GO:0002053/GO:…	biological_process/cellular_component/molecular_function
ENSG00000198815	1	-1.21851	1.21851	-0.123435	0.123435	0.452026	2.6376476574073e-10	ENSG00000198815	forkhead box J3 [Source:HGNC Symbol;Acc:HGNC:29178]	FOXJ3		/GO:0005634/GO:0006355/GO:0006366/GO:0003677/GO:0003700/GO:0043565/GO:0000981/GO:0001228/GO:0045944	/cellular_component/biological_process/molecular_function	C9JXI1/C9JVP0//H7C1Y6/F6VXT0
ENSG00000118482	1	-1.21845	1.21845	-0.124048	0.124048	0.561543	4.22518e-06	ENSG00000118482	PHD finger protein 3 [Source:HGNC Symbol;Acc:HGNC:8921]	PHF3		GO:0046872/GO:0006351/GO:0007275/GO:0003674/GO:0005575/	molecular_function/biological_process/cellular_component/	E7EVH3//D6REP0/D6R9X2/A0A1B0GX99/E9PE34/E7ER40/H0Y8L0/D6RBF0
ENSG00000104432	1	-1.21842	1.21842	-0.124309	0.124309	1.60884	6.47326e-06	ENSG00000104432	interleukin 7 [Source:HGNC Symbol;Acc:HGNC:6023]	IL7		GO:0008083/GO:0010469/GO:0005576/GO:0005515/GO:0006955/GO:0005125/GO:0005615/GO:0005126/GO:0005139/GO:0062023/GO:0043066/GO:0007267/GO:0038111/GO:0009887/GO:0045453/GO:0032722/GO:0019221/GO:0008284/GO:0006959/GO:0030890/GO:0045582/GO:0001961/GO:0002360/GO:0010468/GO:0043086/GO:0046622/GO:0048873/GO:2001237/GO:2001240	molecular_function/biological_process/cellular_component	/Q5FBX5/A0A0A0MTG5/Q5FBY3/Q5FBY6
ENSG00000162981	1	-1.21834	1.21834	0.125085	-0.125085	3.19487	7.13306321357633e-43	ENSG00000162981	family with sequence similarity 84 member A [Source:HGNC Symbol;Acc:HGNC:20743]	FAM84A
ENSG00000109654	1	-1.21828	1.21827	-0.125757	0.125767	1.28337	1.78452839287919e-14	ENSG00000109654	tripartite motif containing 2 [Source:HGNC Symbol;Acc:HGNC:15974]	TRIM2		GO:0008270/GO:0046872/GO:0005622/GO:0005737/GO:0016740/GO:0016567/GO:0005515/GO:0004842/GO:0061630/GO:0043161/GO:0000209/GO:0043523/	molecular_function/cellular_component/biological_process/	C9J084//A0A0J9YY97/A0A0J9YX34/A0A0J9YXY2/C9JVI3/A0A0J9YW70
ENSG00000166348	1	-1.21827	1.21825	-0.125873	0.125887	0.866421	2.37200892087351e-9	ENSG00000166348	ubiquitin specific peptidase 54 [Source:HGNC Symbol;Acc:HGNC:23513]	USP54		/GO:0016579/GO:0005515/GO:0036459	/biological_process/molecular_function	R4GN32//X6RHN7/H7C296/H7C1E9/X6RGF2/X6RH50
ENSG00000278872	1	-1.21819	1.21819	-0.126537	0.126537	2.89097	9.12807998620496e-28
ENSG00000111145	1	-1.21814	1.21814	0.127048	-0.127048	0.718564	8.03719099612272e-12	ENSG00000111145	ELK3 ETS transcription factor [Source:HGNC Symbol;Acc:HGNC:3325]	ELK3		GO:0005634/GO:0005654/GO:0006355/GO:0006366/GO:0005739/GO:0003677/GO:0003700/GO:0043565/GO:0005515/GO:0001525/GO:0042060/GO:0045892/GO:0000981/GO:0030154/GO:0006357/GO:0000978/GO:0045944/GO:0007165/GO:0001077/GO:0003714/GO:0032422/	cellular_component/biological_process/molecular_function/	A0A024RBE2/F8VZQ0/G3V1Z7/H0YIH6/F8VUJ0		hsa:2004	ko:K09430
ENSG00000196323	1	-1.21809	1.21809	-0.127461	0.127461	0.438549	0.000923163	ENSG00000196323	zinc finger and BTB domain containing 44 [Source:HGNC Symbol;Acc:HGNC:25001]	ZBTB44		GO:0003676/GO:0005634/GO:0046872/GO:0003677/GO:0005515/GO:0006357/GO:0000981	molecular_function/cellular_component/biological_process	H0YEM9//H7BY22/A0A0A0MTE9/H0YCZ0		hsa:29068	ko:K10515
ENSG00000107643	1	-1.21799	1.21799	-0.128416	0.128416	0.808883	4.13408945799037e-11	ENSG00000107643	mitogen-activated protein kinase 8 [Source:HGNC Symbol;Acc:HGNC:6881]	MAPK8	04150+2.7.11.24/	GO:0005622/GO:0004672/GO:0005524/GO:0006468/GO:0004707/GO:0000165/GO:0010628/GO:0005739/GO:0005634/GO:0005737/GO:0000166/GO:0004674/GO:0016740/GO:0016301/GO:0016310/GO:0005515/GO:0048511/GO:0038095/GO:0043005/GO:0035556/GO:0005654/GO:0005829/GO:0071260/GO:0043066/GO:0043065/GO:0019899/GO:0032091/GO:0018107/GO:0018105/GO:0042752/GO:0034614/GO:0071276/GO:0010468/GO:0071310/GO:0016241/GO:1900740/GO:…	cellular_component/molecular_function/biological_process/	C9J762/C9JWQ4/
ENSG00000274012	1	-1.21799	1.21799	-0.128469	0.128469	4.40985	0.000121727
ENSG00000165476	1	-1.21786	1.21786	0.129638	-0.129638	0.862293	1.25424208490341e-16	ENSG00000165476	receptor accessory protein 3 [Source:HGNC Symbol;Acc:HGNC:23711]	REEP3		GO:0016020/GO:0016021/GO:0005783/GO:0005789/GO:0051301/GO:0007049/GO:0005874/GO:0006998/GO:0007084	cellular_component/biological_process	X5DR89/A0A0U1RR85		hsa:221035	ko:K17338
ENSG00000196937	1	-1.2178	1.2178	-0.130279	0.130279	1.14835	1.87058450200407e-42	ENSG00000196937	family with sequence similarity 3 member C [Source:HGNC Symbol;Acc:HGNC:18664]	FAM3C		GO:0005794/GO:0010469/GO:0005515/GO:0005576/GO:0007275/GO:0031410/GO:0005125/GO:0070062/GO:0008150/GO:0045721/GO:0002576/GO:0031089	cellular_component/biological_process/molecular_function	/C9JP35/C9JMN4
ENSG00000197746	1	-1.21776	1.21776	0.13065	-0.13065	0.803599	1.66570434155546e-10	ENSG00000197746	prosaposin [Source:HGNC Symbol;Acc:HGNC:9498]	PSAP		GO:0005615/GO:0043231/GO:0006629/GO:0001664/GO:0006665/GO:0007193/GO:0019216/GO:0043408/GO:0043410/GO:0048589/GO:0060736/GO:0060742/GO:0071310/GO:1903206/GO:0005764/GO:0043085/GO:0005515/GO:0005576/GO:0005886/GO:0070062/GO:0062023/GO:0007186/GO:0043312/GO:0002576/GO:0035577/GO:0043202/GO:0005765/GO:0008047/GO:0008289/GO:0042803/GO:0010506/GO:0004565/GO:0005543/GO:1905573/GO:1905574/GO:1905575/GO:…	cellular_component/biological_process/molecular_function	A0A024QZQ2/A0A0J9YXB8/C9JIZ6/Q5BJH1	path:hsa04142	hsa:5660	ko:K12382	Lysosome - Homo sapiens (human)
ENSG00000164199	1	-1.21768	1.21768	0.131371	-0.131371	1.10914	2.63144e-06	ENSG00000164199	adhesion G protein-coupled receptor V1 [Source:HGNC Symbol;Acc:HGNC:17416]	ADGRV1		GO:0016021/GO:0004930/GO:0007186/GO:0016020/GO:0005886/GO:0005515/GO:0007165/GO:0004888/GO:0007166/GO:0007154/GO:0050896/GO:0007399/GO:0070062/GO:0009986/GO:0007601/GO:0005737/GO:0043235/GO:0098609/GO:0007605/GO:0045494/GO:0048496/GO:0050953/GO:0005509/GO:0050877/GO:0032420/GO:0045202	cellular_component/molecular_function/biological_process	A0A1W2PPA4/A0A1W2PS08/A0A1W2PR51/A0A1W2PNS5/A0A1W2PQP9/A0A1W2PRR5/A0A1W2PRC7/A0A1W2PR84//A0A1W2PS99/D6RIF0/A0A1W2PQU5/A0A1X7SBU6/A0A1W2PQK7/A0A1W2PP32
ENSG00000183935	1	-1.21762	1.21762	-0.131924	0.131924	1.02111	3.018e-06
ENSG00000230928	1	-1.21761	1.21761	-0.132006	0.132006	3.67659	2.97499196266299e-26
ENSG00000130066	1	-1.21759	1.21758	0.132265	-0.132256	1.40203	2.97969396475876e-14	ENSG00000130066	spermidine/spermine N1-acetyltransferase 1 [Source:HGNC Symbol;Acc:HGNC:10540]	SAT1	00330+2.3.1.57	GO:0004145/GO:0005737/GO:0016740/GO:0016746/GO:0005515/GO:0042802/GO:0005829/GO:0001525/GO:0005622/GO:0008080/GO:0019809/GO:0006595/GO:0006596/GO:0006598/GO:0009447/GO:0032918/GO:0042127	molecular_function/cellular_component/biological_process	A6NJE6//E9PD37/A6NM56
ENSG00000141404	1	-1.2175	1.2175	-0.133008	0.133008	1.60338	3.46093958985002e-22	ENSG00000141404	G protein subunit alpha L [Source:HGNC Symbol;Acc:HGNC:4388]	GNAL		GO:0005622/GO:0046872/GO:0000166/GO:0007186/GO:0007165/GO:0003924/GO:0005525/GO:0005834/GO:0019001/GO:0031683/GO:0005886/GO:0070062/GO:0007608/GO:0001664/GO:0007188/GO:0007193/GO:0007189/	cellular_component/molecular_function/biological_process/	K7EPE2//A8K1Y9/K7EMY6/K7EQ80	path:hsa05146/path:hsa05142/path:hsa04728/path:hsa05012/path:hsa04020/path:hsa04740	hsa:2774	ko:K04633	Amoebiasis - Homo sapiens (human)/Chagas disease (American trypanosomiasis) - Homo sapiens (human)/Dopaminergic synapse - Homo sapiens (human)/Parkinson disease - Homo sapiens (human)/Calcium signaling pathway - Homo sapiens (human)/Olfactory transduction - Homo sapiens (human)
ENSG00000174028	1	-1.21743	1.21744	-0.133596	0.133586	1.20776	6.61688332041191e-47
ENSG00000265763	1	-1.21735	1.21736	0.134365	-0.134377	1.03929	1.33212757155499e-16	ENSG00000265763	zinc finger protein 488 [Source:HGNC Symbol;Acc:HGNC:23535]	ZNF488		GO:0003676/GO:0005634/GO:0046872/GO:0003677/GO:0005515/GO:0007399/GO:0014003	molecular_function/cellular_component/biological_process
ENSG00000171988	1	-1.21729	1.21729	0.134902	-0.134902	1.06507	8.93325097144099e-23	ENSG00000171988	jumonji domain containing 1C [Source:HGNC Symbol;Acc:HGNC:12313]	JMJD1C		GO:0005634/GO:0046872/GO:0016491/GO:0055114/GO:0006325/GO:0005515/GO:0006355/GO:0051213/GO:0005654/GO:0005622/GO:0032454/GO:0000976/GO:0000785/GO:0007596/GO:0031490/GO:0033169/GO:0046966/	cellular_component/molecular_function/biological_process/	A0A1W2PNZ9//H7BXU7
ENSG00000110066	1	-1.21725	1.21725	-0.135262	0.135262	0.438524	1.07286019711612e-8	ENSG00000110066	lysine methyltransferase 5B [Source:HGNC Symbol;Acc:HGNC:24283]	KMT5B	00310+2.1.1.43/	GO:0005634/GO:0008168/GO:0016740/GO:0032259/GO:0006325/GO:0005694/GO:0018024/GO:0042799/GO:0034773/GO:0007517/GO:0005654/GO:0016571/GO:0000780/	cellular_component/molecular_function/biological_process/	F8WFA4/C9JP58//C9JFG1/C9J6S5/B5MCB3/B7WNX0/A0A0A0MT19/H7BXP2
ENSG00000131558	1	-1.21721	1.21719	-0.135751	0.135773	0.650035	5.10022895633339e-21	ENSG00000131558	exocyst complex component 4 [Source:HGNC Symbol;Acc:HGNC:30389]	EXOC4		GO:0016020/GO:0015031/GO:0000145/GO:0042995/GO:0005515/GO:0005886/GO:0006904/GO:0007268/GO:0006887/GO:0005737/GO:0005829/GO:0045202/GO:0006893/GO:0017160/GO:0047485/GO:0016241/GO:0090543/GO:0006612/GO:0032584/GO:0030165/GO:0048341/GO:0005902/GO:0035748	cellular_component/biological_process/molecular_function
ENSG00000106299	1	-1.21718	1.21718	0.135901	-0.135901	0.629742	1.13339307813033e-10	ENSG00000106299	Wiskott-Aldrich syndrome like [Source:HGNC Symbol;Acc:HGNC:12735]	WASL		GO:0005634/GO:0005737/GO:0003779/GO:0007015/GO:2000601/GO:0051301/GO:0005829/GO:0005856/GO:0005515/GO:0007049/GO:0038096/GO:0005886/GO:0051015/GO:0070062/GO:0000147/GO:0006897/GO:0030048/GO:0051127/GO:0051666/GO:0005884/GO:0030479/GO:0061024/GO:0030695/GO:0006900/GO:0008154/GO:0009617/GO:0016050/GO:0030036/GO:0030050/GO:0032880/GO:0034629/GO:0048013/GO:0050999/GO:0051491/GO:0051653/GO:0060997/GO:…	cellular_component/molecular_function/biological_process
ENSG00000171148	1	-1.21717	1.21717	-0.136001	0.136001	1.22537	4.70286197193031e-48	ENSG00000171148	transcriptional adaptor 3 [Source:HGNC Symbol;Acc:HGNC:19422]	TADA3		GO:0005634/GO:0005654/GO:0005515/GO:0004402/GO:0003713/GO:0045893/GO:0006357/GO:0010628/GO:0016579/GO:0019904/GO:0033276/GO:0003700/GO:0030520/GO:0043967/GO:0005622/GO:0036459/GO:0043966/GO:0005671/GO:0030914/GO:0016922/GO:0030374/GO:0000278/GO:0001932/GO:0031063/GO:0031647/GO:0090043/GO:0000124/GO:0072686/	cellular_component/molecular_function/biological_process/	/C9JMS0/A0A024R2D7
ENSG00000129315	1	-1.21707	1.2171	-0.136773	0.136749	0.57042	2.69088960803135e-7	ENSG00000129315	cyclin T1 [Source:HGNC Symbol;Acc:HGNC:1599]	CCNT1		GO:0005634/GO:0005654/GO:0051301/GO:0006351/GO:0005515/GO:0007049/GO:0045944/GO:0016032/GO:0004674/GO:0006366/GO:0006368/GO:1900364/GO:0003677/GO:0042795/GO:0006468/GO:0008134/GO:0003682/GO:0016538/GO:0017069/GO:0019901/GO:0044212/GO:0070063/GO:0097322/GO:0000079/GO:0043923/GO:0045737/GO:0050434/GO:1901409/GO:0000307/GO:0008024	cellular_component/biological_process/molecular_function	A0A1W2PQ16/
ENSG00000221887	1	-1.21692	1.21692	-0.138255	0.138255	2.06621	0.000103013	ENSG00000221887	histocompatibility minor serpin domain containing [Source:HGNC Symbol;Acc:HGNC:23037]	HMSD		GO:0005615/GO:0010951/GO:0005576/GO:0030414/GO:0010466/GO:0004867/GO:0002253/GO:0019835/GO:0003674/GO:0005575/GO:1902715	cellular_component/biological_process/molecular_function
ENSG00000169946	1	-1.21687	1.21687	0.138696	-0.138696	5.71483	5.92225e-05	ENSG00000169946	zinc finger protein FOG family member 2 [Source:HGNC Symbol;Acc:HGNC:16700]	ZFPM2		GO:0045944/GO:0060412/GO:0003676/GO:0005634/GO:0046872/GO:0005654/GO:0006357/GO:0003677/GO:0030154/GO:0001085/GO:0000122/GO:0001078/GO:0005515/GO:0000981/GO:0007507/GO:0007506/GO:0003713/GO:0045892/GO:0045599/GO:0007596/GO:0003714/GO:0003148/GO:0008134/GO:0008270/GO:0003221/GO:0001570/GO:0001701/GO:0030324/GO:0045893/GO:0048568/GO:0048738/GO:0060045/GO:0060548/GO:2000020/GO:2000195/GO:0005737/GO:…	biological_process/molecular_function/cellular_component/	E5RJX0//E7ET52
ENSG00000238105	1	-1.21681	1.21681	-0.139175	0.139175	0.963856	5.07784711877359e-7
ENSG00000186376	1	-1.21676	1.21673	0.139759	-0.139732	0.522574	2.85852e-05	ENSG00000186376	zinc finger protein 75D [Source:HGNC Symbol;Acc:HGNC:13145]	ZNF75D		GO:0003676/GO:0005634/GO:0046872/GO:0006355/GO:0003677/GO:0003700/GO:0005622/GO:0008270/GO:0006357/GO:0000981	molecular_function/cellular_component/biological_process
ENSG00000130193	1	-1.21674	1.21674	-0.139762	0.139762	0.649908	1.13488776094041e-7	ENSG00000130193	thioesterase superfamily member 6 [Source:HGNC Symbol;Acc:HGNC:29656]	THEM6		GO:0005576/	cellular_component/	H0YAR9/
ENSG00000077585	1	-1.21673	1.21673	-0.139846	0.139846	1.61956	4.89623634433046e-18	ENSG00000077585	G protein-coupled receptor 137B [Source:HGNC Symbol;Acc:HGNC:11862]	GPR137B		GO:0016020/GO:0016021/GO:0005765/GO:0005764/GO:0005887	cellular_component	Q5TAF0//H0Y509
ENSG00000121749	1	-1.2167	1.21673	-0.140036	0.140014	0.638731	2.89277e-05	ENSG00000121749	TBC1 domain family member 15 [Source:HGNC Symbol;Acc:HGNC:25694]	TBC1D15		/GO:0005737/GO:0005515/GO:0005096/GO:0017137/GO:0006886/GO:0090630/GO:0043087/GO:0005576	/cellular_component/molecular_function/biological_process	F8WCB5/F8VV61/F8WDJ1//F8WAX5/F8WF35/C9JA93
ENSG00000254999	1	-1.21669	1.21669	-0.140225	0.140233	1.45073	3.23780601106608e-100	ENSG00000254999	BRICK1 SCAR/WAVE actin nucleating complex subunit [Source:HGNC Symbol;Acc:HGNC:23057]	BRK1		GO:0005737/GO:0007015/GO:0005856/GO:0005515/GO:0044877/GO:0038096/GO:0005829/GO:0030027/GO:0070062/GO:0048010/GO:0048870/GO:0010592/GO:0048365/GO:0070207/GO:0016601/GO:0031209/GO:0008064/GO:2000601/GO:0001701/GO:0008284/GO:0030036	cellular_component/biological_process/molecular_function
ENSG00000221838	1	-1.21666	1.21667	-0.140473	0.140459	0.720272	0.000896218	ENSG00000221838	adaptor related protein complex 4 subunit mu 1 [Source:HGNC Symbol;Acc:HGNC:574]	AP4M1		/GO:0016020/GO:0006886/GO:0015031/GO:0016192/GO:0030131/GO:0005829/GO:0005794/GO:0005515/GO:0005768/GO:0005769/GO:0070062/GO:0005802/GO:0006605/GO:0019904/GO:0006622/GO:0006895/GO:0008104/GO:0090160/GO:1903361/GO:0030124/GO:0031904/GO:0032588	/cellular_component/biological_process/molecular_function	C9JWL4/F8WDR3/F8WCC5/C9IZL5/H7C0A0/H0Y6K1/H7BZV3/C9JMG3/C9JC87/F8WCR6/
ENSG00000233251	1	-1.21651	1.21651	-0.141813	0.141814	1.90503	1.27775559090378e-26
ENSG00000122958	1	-1.21643	1.21645	-0.142367	0.142351	0.702092	1.32139471516782e-13	ENSG00000122958	VPS26 retromer complex component A [Source:HGNC Symbol;Acc:HGNC:12711]	VPS26A		GO:0005737/GO:0016020/GO:0015031/GO:0005515/GO:0005768/GO:0005764/GO:0006886/GO:0005829/GO:0005769/GO:0010008/GO:0042147/GO:1990126/GO:0031982/GO:0008565/GO:0016055/GO:0016241/GO:0030904/GO:0030906/GO:0097422/	cellular_component/biological_process/molecular_function/	/S4R3Q6/S4R2Y3
ENSG00000148660	1	-1.21642	1.21643	0.142504	-0.142521	0.777233	2.06882243876555e-29	ENSG00000148660	calcium/calmodulin dependent protein kinase II gamma [Source:HGNC Symbol;Acc:HGNC:1463]	CAMK2G		GO:0016020/GO:0000166/GO:0004672/GO:0004674/GO:0005524/GO:0006468/GO:0016740/GO:0016301/GO:0016310/GO:0005515/GO:0007275/GO:0006470/GO:0030154/GO:0004683/GO:0005516/GO:0005886/GO:0042802/GO:0043005/GO:0005737/GO:0007399/GO:0005654/GO:0005829/GO:0016529/GO:0042803/GO:0030666/GO:0005088/GO:0000165/GO:0051924/GO:0033017/GO:0060333/GO:0051259/GO:0030073/GO:0004723/GO:0014733/GO:0000082/GO:0006816/GO:…	cellular_component/molecular_function/biological_process	Q8WU40//Q5SWX3/H0Y6G2/A0A2Q3DQE3
ENSG00000052126	1	-1.21609	1.21609	0.145319	-0.145319	0.352854	5.20614e-05	ENSG00000052126	pleckstrin homology domain containing A5 [Source:HGNC Symbol;Acc:HGNC:30036]	PLEKHA5		GO:0005737/GO:0016020/GO:0005829/GO:0005654/GO:0005515/GO:0008150/GO:0010314/GO:0032266/GO:0070273/GO:0080025/GO:0061458/	cellular_component/molecular_function/biological_process/	H0YG48/H0YGJ6/B4DJX4/A0A024RAY7/A0JP02//F5H1X3
ENSG00000185306	1	-1.21608	1.21608	0.145417	-0.145416	1.48906	0.000699975	ENSG00000185306	chromosome 12 open reading frame 56 [Source:HGNC Symbol;Acc:HGNC:26967]	C12orf56				H0YGI1/
ENSG00000105983	1	-1.21607	1.21607	0.145524	-0.145524	0.557776	6.57825134719672e-8	ENSG00000105983	limb development membrane protein 1 [Source:HGNC Symbol;Acc:HGNC:13243]	LMBR1		GO:0016020/GO:0016021/GO:0042733/	cellular_component/biological_process/	F8WCL1/F2Z2Z3/F8WB14/F8WDW0/A0A1W2PQV9/H0Y6V6/Q8NDP7//H7C1Y4/F8WEN8/F8WEK4
ENSG00000111300	1	-1.21594	1.21594	0.146563	-0.146563	0.473096	0.000972166	ENSG00000111300	N(alpha)-acetyltransferase 25 NatB auxiliary subunit [Source:HGNC Symbol;Acc:HGNC:25783]	NAA25		GO:0005737/GO:0005794/GO:0005829/GO:0017196/GO:0031416/	cellular_component/biological_process/	H0YHR9//F8VSB9/F8W0N5
ENSG00000168298	1	-1.21579	1.21579	-0.147796	0.147796	2.38679	1.02326e-05	ENSG00000168298	histone cluster 1 H1 family member e [Source:HGNC Symbol;Acc:HGNC:4718]	HIST1H1E		GO:0003723/GO:0005634/GO:0003677/GO:0031490/GO:0006334/GO:0000786/GO:0005694/GO:0005515/GO:0005525/GO:0000122/GO:0006355/GO:0005509/GO:0003690/GO:0005524/GO:0045910/GO:0043531/GO:0031492/GO:0016584/GO:0030261/GO:0031936/GO:0016208/GO:0005720/GO:0000166/GO:0032564/GO:0006357/GO:0080182/GO:0098532/GO:0000788	molecular_function/cellular_component/biological_process
ENSG00000069849	1	-1.21578	1.21576	-0.147975	0.147995	0.621558	2.68660550554662e-18	ENSG00000069849	ATPase Na+/K+ transporting subunit beta 3 [Source:HGNC Symbol;Acc:HGNC:806]	ATP1B3		GO:0005886/GO:0006813/GO:0006814/GO:0005890/GO:0050821/GO:0016020/GO:0016021/GO:0006811/GO:0042470/GO:0050900/GO:0010248/GO:0010107/GO:0070062/GO:1903278/GO:0051117/GO:0005391/GO:0006883/GO:0030007/GO:0036376/GO:0086009/GO:0001671/GO:0032781/GO:0072659/GO:1901018/GO:1903288/GO:0030001/GO:0005737/GO:0005901/	cellular_component/biological_process/molecular_function/	F8WBY4/C9JXZ1/H7C4L9//C9J6S2/C9JA36/H7C547
ENSG00000107625	1	-1.21576	1.21576	-0.148109	0.148109	0.737921	1.53784422009587e-9	ENSG00000107625	DExD-box helicase 50 [Source:HGNC Symbol;Acc:HGNC:17906]	DDX50		GO:0003676/GO:0003723/GO:0005634/GO:0016020/GO:0000166/GO:0005524/GO:0005730/GO:0016787/GO:0004386/GO:0005886/	molecular_function/cellular_component/	A0A087WVC1//S4R3V4/S4R3G6
ENSG00000196693	1	-1.21547	1.21551	0.150273	-0.15031	0.591212	0.00022171	ENSG00000196693	zinc finger protein 33B [Source:HGNC Symbol;Acc:HGNC:13097]	ZNF33B		/GO:0003676/GO:0006355/GO:0005622/GO:0005634/GO:0046872/GO:0003677/GO:0005515/GO:0006357/GO:0000981	/molecular_function/biological_process/cellular_component	/A0A087WVA3/A0A087X1D4/A0A087WXT3/A0A087WXF4
ENSG00000163050	1	-1.21543	1.21543	-0.150728	0.150728	0.993741	2.93566489815659e-19	ENSG00000163050	coenzyme Q8A [Source:HGNC Symbol;Acc:HGNC:16812]	COQ8A		GO:0016020/GO:0016021/GO:0000166/GO:0005524/GO:0016740/GO:0016301/GO:0016310/GO:0005739/GO:0006468/GO:0006744/GO:0005515/GO:0043531/GO:0031314	cellular_component/molecular_function/biological_process	A0A024R3S3/
ENSG00000078081	1	-1.2154	1.2154	0.151042	-0.151042	2.70594	0.000143855	ENSG00000078081	lysosomal associated membrane protein 3 [Source:HGNC Symbol;Acc:HGNC:14582]	LAMP3		GO:0016020/GO:0016021/GO:0043231/GO:0005765/GO:0031410/GO:0030659/GO:0002376/GO:0005764/GO:0002250/GO:0048471/GO:0005886/GO:0005769/GO:0031982/GO:0010628/GO:0010506/GO:0043154/GO:0035455/GO:1901799/GO:1903900/GO:0097233	cellular_component/biological_process	C9JDI8//C9JYP5/E7ETP9
ENSG00000151164	1	-1.21539	1.21539	0.151048	-0.151048	1.20885	0.000204806	ENSG00000151164	RAD9 checkpoint clamp component B [Source:HGNC Symbol;Acc:HGNC:21700]	RAD9B		GO:0000077/GO:0006281/GO:0090305/GO:0030896/GO:0005515/GO:0005654/GO:0031573/GO:0008408/GO:0071479	biological_process/cellular_component/molecular_function	J3KPN7/B4DX60/H7BY23/B4DYM6/A0A024RBN9	path:hsa04218	hsa:144715	ko:K10995	Cellular senescence - Homo sapiens (human)
ENSG00000256043	1	-1.21539	1.21539	-0.151097	0.151097	1.83331	6.72332044004684e-18	ENSG00000256043	cathepsin O [Source:HGNC Symbol;Acc:HGNC:2542]	CTSO		GO:0016787/GO:0008233/GO:0008234/GO:0006508/GO:0005764/GO:0005615/GO:0004197/GO:0051603	molecular_function/biological_process/cellular_component
ENSG00000088756	1	-1.21537	1.21537	-0.151285	0.151285	1.49232	0.000728534	ENSG00000088756	Rho GTPase activating protein 28 [Source:HGNC Symbol;Acc:HGNC:25509]	ARHGAP28		GO:0007165/GO:0043547/GO:0005096/GO:0005737/GO:0005829/GO:0051056/GO:0032956/GO:0030833/GO:0051497/GO:1904425/	biological_process/molecular_function/cellular_component/	E9PMX7/J3QLR3//E9PL26/J3KTC0/J3QRC2/J3KT69/J3QKM0
ENSG00000165516	1	-1.21521	1.21521	0.152552	-0.152552	0.715351	1.94056128288204e-12	ENSG00000165516	kelch domain containing 2 [Source:HGNC Symbol;Acc:HGNC:20231]	KLHDC2		GO:0005634/GO:0031965/GO:0016604	cellular_component	/G3V2H2/G3V3U8
ENSG00000120647	1	-1.2152	1.2152	-0.15258	0.15258	0.549239	4.57932e-05	ENSG00000120647	coiled-coil domain containing 77 [Source:HGNC Symbol;Acc:HGNC:28203]	CCDC77		GO:0016020/GO:0005813/	cellular_component/	/F5H5Q8/F5H0W5
ENSG00000134070	1	-1.2152	1.2152	-0.15261	0.152614	2.68587	3.89961840826866e-120	ENSG00000134070	interleukin 1 receptor associated kinase 2 [Source:HGNC Symbol;Acc:HGNC:6113]	IRAK2		GO:0032088/GO:0000166/GO:0004672/GO:0005524/GO:0006468/GO:0007165/GO:0005515/GO:0006954/GO:0002755/GO:0005886/GO:0005634/GO:0005737/GO:0007249/GO:0004674/GO:0035556/GO:0005829/GO:0010008/GO:0070498/GO:0019221/GO:0051092/GO:0042803/GO:0046982/GO:0002224/GO:0000187/GO:0001959/GO:0007254/GO:0031663/GO:0034162/GO:0043433/GO:0070423/GO:0070555	biological_process/molecular_function/cellular_component
ENSG00000224546	1	-1.21513	1.21513	0.153138	-0.153136	0.72033	1.86708e-05
ENSG00000171791	1	-1.21504	1.21504	-0.15384	0.15384	1.32455	3.62397e-05	ENSG00000171791	BCL2 apoptosis regulator [Source:HGNC Symbol;Acc:HGNC:990]	BCL2		GO:0043066/GO:0005634/GO:0005737/GO:0016020/GO:0016021/GO:0005654/GO:0005783/GO:0005789/GO:0031965/GO:0042981/GO:0005739/GO:0042803/GO:0005515/GO:0006974/GO:0008134/GO:0019903/GO:0046982/GO:0051721/GO:0000902/GO:0001503/GO:0001541/GO:0001656/GO:0001657/GO:0001658/GO:0001662/GO:0001776/GO:0001782/GO:0001822/GO:0001836/GO:0001952/GO:0002260/GO:0002320/GO:0002326/GO:0002360/GO:0002520/GO:0002931/GO:…	biological_process/cellular_component/molecular_function	A0A024R2B3/A0A024R2C4	path:hsa04915/path:hsa05210/path:hsa05162/path:hsa01521/path:hsa04141/path:hsa05168/path:hsa05170/path:hsa04630/path:hsa05222/path:hsa01524/path:hsa05132/path:hsa04066/path:hsa04115/path:hsa04217/path:hsa04340/path:hsa05200/path:hsa01522/path:hsa04151/path:hsa05418/path:hsa05145/path:hsa04064/path:hsa05131/path:hsa05169/path:hsa05161/path:hsa05152/path:hsa04215/path:hsa05014/path:hsa04140/path:hs…	hsa:596	ko:K02161	Estrogen signaling pathway - Homo sapiens (human)/Colorectal cancer - Homo sapiens (human)/Measles - Homo sapiens (human)/EGFR tyrosine kinase inhibitor resistance - Homo sapiens (human)/Protein processing in endoplasmic reticulum - Homo sapiens (human)/Herpes simplex virus 1 infection - Homo sapiens (human)/Human immunodeficiency virus 1 infection - Homo sapiens (human)/JAK-STAT signaling pathwa…
ENSG00000197147	1	-1.215	1.215	0.154171	-0.154171	0.7134	3.1626967412052e-7	ENSG00000197147	leucine rich repeat containing 8 VRAC subunit B [Source:HGNC Symbol;Acc:HGNC:30692]	LRRC8B		GO:0005623/GO:0016020/GO:0016021/GO:0015698/GO:0098656/GO:0005225/GO:0006884/GO:0034702/GO:0005737/GO:0005783/GO:0005789/GO:0006811/GO:0005886/GO:0005515/GO:0005887/GO:0055085	cellular_component/biological_process/molecular_function	C9JGJ7/Q537H9/
ENSG00000089248	1	-1.21493	1.21493	-0.154768	0.154768	0.323136	8.75517e-05	ENSG00000089248	endoplasmic reticulum protein 29 [Source:HGNC Symbol;Acc:HGNC:13799]	ERP29		GO:0016020/GO:0005783/GO:0042470/GO:0009306/GO:0005788/GO:0042803/GO:0051087/GO:0010628/GO:0010629/GO:0009986/GO:0043335/GO:0000187/GO:0001934/GO:0006457/GO:0006886/GO:0050709/GO:1902235/GO:0005790/GO:0030133	cellular_component/biological_process/molecular_function	V9HW71/F8VY02/F8W1G0/	path:hsa04141	hsa:10961	ko:K09586	Protein processing in endoplasmic reticulum - Homo sapiens (human)
ENSG00000120008	1	-1.21492	1.21492	-0.154794	0.154794	0.29383	0.000587469	ENSG00000120008	WD repeat domain 11 [Source:HGNC Symbol;Acc:HGNC:13831]	WDR11		GO:0005634/GO:0005737/GO:0016020/GO:0016021/GO:0006886/GO:0005829/GO:0005765/GO:0015630/GO:0031410/GO:0005515/GO:0036064/GO:0060271/GO:0007507/GO:0005802/GO:0005930/GO:0008589/GO:0035264/GO:0060322/GO:0099041/	cellular_component/biological_process/molecular_function/	S4R3Z0/S4R451//S4R3P9
ENSG00000006016	1	-1.21492	1.21492	-0.154796	0.154795	1.0377	3.01981e-06	ENSG00000006016	cytokine receptor like factor 1 [Source:HGNC Symbol;Acc:HGNC:2364]	CRLF1		GO:0008284/GO:0042531/GO:0010469/GO:0005576/GO:0009897/GO:0043235/GO:0005829/GO:0005515/GO:0046982/GO:0005615/GO:0019221/GO:0005125/GO:0043524/GO:0070106/GO:0005127/GO:0004896/GO:0019955/GO:0001657/GO:2000672/GO:0097058/	biological_process/cellular_component/molecular_function/	M0QZL6/
ENSG00000165312	1	-1.21481	1.21483	0.155591	-0.155609	0.656923	1.74296044945378e-7	ENSG00000165312	OTU deubiquitinase 1 [Source:HGNC Symbol;Acc:HGNC:27346]	OTUD1		GO:0016787/GO:0008233/GO:0008234/GO:0006508/GO:0036459/GO:0004843/GO:0070536	molecular_function/biological_process
ENSG00000006747	1	-1.21481	1.21481	-0.155683	0.155683	3.75302	5.53311105678109e-18	ENSG00000006747	scinderin [Source:HGNC Symbol;Acc:HGNC:21695]	SCIN		GO:0005737/GO:0046872/GO:0005509/GO:0003779/GO:0051015/GO:0005886/GO:0051693/GO:0005856/GO:0042995/GO:0030054/GO:0051014/GO:0070062/GO:0002102/GO:0008285/GO:0005938/GO:0043065/GO:0005546/GO:0001786/GO:0005545/GO:0051047/GO:0042989/GO:0051127/GO:0017156/GO:0045654/GO:0045010/GO:0032330/GO:0005903/GO:0032991	cellular_component/molecular_function/biological_process	C9JGB6/F8WBX5/E5RHN8//E5RHX6
ENSG00000004700	1	-1.21448	1.21448	0.158205	-0.158205	0.481448	7.31406916000111e-7	ENSG00000004700	RecQ like helicase [Source:HGNC Symbol;Acc:HGNC:9948]	RECQL		GO:0003676/GO:0005634/GO:0016020/GO:0000166/GO:0005524/GO:0005654/GO:0016787/GO:0004386/GO:0008026/GO:0032508/GO:0003677/GO:0005515/GO:0006310/GO:0005737/GO:0004003/GO:0006281/GO:0000724/GO:0009378/GO:0036310/GO:0043140/GO:0000733/GO:0005694/GO:0003678/	molecular_function/cellular_component/biological_process/	A0A024RAV2/F8WD97/F8WA66/F5H4P4/F5GYB7/F5H3W0/F5H2L2		hsa:5965	ko:K10899
ENSG00000170142	1	-1.21447	1.2145	-0.158219	0.158185	0.401244	1.02871608846777e-9	ENSG00000170142	ubiquitin conjugating enzyme E2 E1 [Source:HGNC Symbol;Acc:HGNC:12477]	UBE2E1		GO:0005634/GO:0000166/GO:0005524/GO:0016740/GO:0016567/GO:0005515/GO:0004842/GO:0061631/GO:0010390/GO:0005654/GO:0005829/GO:0031145/GO:0070936/GO:0000151/GO:0042296/GO:0032020/GO:0006511/GO:0000209/GO:0033523	cellular_component/molecular_function/biological_process	H7C061//A0A024R2K3/C9J2P0/B7Z306	path:hsa04120	hsa:7324	ko:K20217	Ubiquitin mediated proteolysis - Homo sapiens (human)
ENSG00000138674	1	-1.21446	1.21449	-0.158302	0.15827	0.323145	6.53531e-06	ENSG00000138674	SEC31 homolog A COPII coat complex component [Source:HGNC Symbol;Acc:HGNC:17052]	SEC31A		/GO:0005737/GO:0016020/GO:0015031/GO:0043231/GO:0005829/GO:0005783/GO:0005789/GO:0005515/GO:0048471/GO:0031410/GO:0006886/GO:0016192/GO:0006888/GO:0000139/GO:0012507/GO:0070971/GO:0048306/GO:0005198/GO:0019886/GO:0048208/GO:0036498/GO:0002474/GO:0051592/GO:0030127/GO:0090110/GO:0090114/GO:0030120/GO:0030134	/cellular_component/biological_process/molecular_function	H0Y9T9/H0Y9V3/D6RAB3/U3KQC9/D6REA9/H0Y9K1/H0Y8V7/H0YAF5/A0A024RDH6/H7BXG7/A0A024RDD3/D6RHE8/D6REX3/D6RBT0//D6RHZ5/U3KQR3/D6RE64/D6REC0/D6RCQ9/H0Y8W8/H0YAB3
ENSG00000135821	1	-1.21444	1.21443	-0.158598	0.158604	2.01292	2.5065608709837e-44	ENSG00000135821	glutamate-ammonia ligase [Source:HGNC Symbol;Acc:HGNC:4341]	GLUL	00220+6.3.1.2/00630+6.3.1.2/00250+6.3.1.2/00910+6.3.1.2	GO:0000166/GO:0005524/GO:0003824/GO:0016874/GO:0006807/GO:0004356/GO:0006542/GO:0005634/GO:0005737/GO:0005829/GO:0005739/GO:0016829/GO:0005515/GO:0042802/GO:0070062/GO:0008283/GO:0008652/GO:0006538/GO:0004351/GO:0001504/GO:0000287/GO:0016595/GO:0030145/GO:0045503/GO:0006536/GO:0009267/GO:0009749/GO:0019676/GO:0032024/GO:0050679/GO:0051260/GO:0051968/GO:0005791/GO:0032991/GO:0042995/GO:0043005/GO:…	molecular_function/biological_process/cellular_component	A8YXX4/A0A2R8YDT1	path:hsa00220/path:hsa00250/path:hsa04727/path:hsa04217/path:hsa01230/path:hsa01100/path:hsa04724/path:hsa00630/path:hsa00910	hsa:2752	ko:K01915	Arginine biosynthesis - Homo sapiens (human)/Alanine aspartate and glutamate metabolism - Homo sapiens (human)/GABAergic synapse - Homo sapiens (human)/Necroptosis - Homo sapiens (human)/Biosynthesis of amino acids - Homo sapiens (human)/Metabolic pathways - Homo sapiens (human)/Glutamatergic synapse - Homo sapiens (human)/Glyoxylate and dicarboxylate metabolism - Homo sapiens (human)/Nitrogen me…
ENSG00000095713	1	-1.21434	1.21434	0.159334	-0.159334	4.39703	1.05386927529611e-55	ENSG00000095713	cartilage acidic protein 1 [Source:HGNC Symbol;Acc:HGNC:14882]	CRTAC1		/GO:0005509/GO:0005515/GO:0005576/GO:0070062/GO:0007413/GO:0021772/GO:1900121/GO:0030426	/molecular_function/cellular_component/biological_process	/A0A0C4DFP6/Q5T4F6/H0Y6C6
ENSG00000133606	1	-1.21413	1.21413	-0.160928	0.160928	0.485419	2.51694725642492e-11	ENSG00000133606	makorin ring finger protein 1 [Source:HGNC Symbol;Acc:HGNC:7112]	MKRN1		GO:0003723/GO:0046872/GO:0016740/GO:0016567/GO:0005515/GO:0061630/GO:0005829/GO:0005575/GO:0004842/GO:0000209/	molecular_function/biological_process/cellular_component/	C9IY57/C9JYI0/F8WBJ4/H7C4H5/F8WAS8/C9J031/F8WEY8/C9JYX8/H7C588/C9IZP5/
ENSG00000088386	1	-1.21376	1.21376	0.16368	-0.16368	1.62334	8.55338e-06	ENSG00000088386	solute carrier family 15 member 1 [Source:HGNC Symbol;Acc:HGNC:10920]	SLC15A1		GO:0016020/GO:0016021/GO:0015031/GO:0005215/GO:0055085/GO:0015293/GO:0022857/GO:1902600/GO:0005886/GO:0005887/GO:0015333/GO:0035673/GO:1904680/GO:0015833/GO:0035672/GO:0005427/GO:0006857/GO:0005903/GO:0006811/GO:0071916/GO:0035442	cellular_component/biological_process/molecular_function	B2CQT6	path:hsa04974	hsa:6564	ko:K14206	Protein digestion and absorption - Homo sapiens (human)
ENSG00000139083	1	-1.21375	1.21375	-0.163718	0.163718	0.662548	8.4495028248268e-23	ENSG00000139083	ETS variant 6 [Source:HGNC Symbol;Acc:HGNC:3495]	ETV6		GO:0005634/GO:0005730/GO:0005829/GO:0006355/GO:0006366/GO:0003677/GO:0003700/GO:0043565/GO:0005515/GO:0000981/GO:0030154/GO:0000978/GO:0001077/GO:0007296/GO:0022008/GO:0045944/GO:0097152/GO:0006357/GO:0000122/GO:0019904/GO:0000977/GO:0001227/GO:0071425/GO:0016020/GO:0016021	cellular_component/biological_process/molecular_function	J3KN52/H0YG25/A0A0S2Z3C9	path:hsa05202	hsa:2120	ko:K03211	Transcriptional misregulation in cancer - Homo sapiens (human)
ENSG00000090615	1	-1.2135	1.2135	-0.165617	0.165617	0.587812	5.25505578388471e-8	ENSG00000090615	golgin A3 [Source:HGNC Symbol;Acc:HGNC:4426]	GOLGA3		GO:0005737/GO:0016020/GO:0005794/GO:0005634/GO:0005730/GO:0005654/GO:0005829/GO:0006891/GO:0017119/GO:0007283/GO:0090498/GO:0005515/GO:0032580/GO:0045296/GO:0000139/GO:0005215	cellular_component/biological_process/molecular_function	/A0A087WV43
ENSG00000177169	1	-1.21336	1.21336	0.166625	-0.166625	0.968047	0.000375422	ENSG00000177169	unc-51 like autophagy activating kinase 1 [Source:HGNC Symbol;Acc:HGNC:12558]	ULK1	05165+2.7.11.1/04150+2.7.11.1/04926+2.7.11.1/04714+2.7.11.1/04151+2.7.11.1	GO:0005737/GO:0000166/GO:0004672/GO:0004674/GO:0005524/GO:0006468/GO:0016740/GO:0016301/GO:0016310/GO:0007165/GO:0005829/GO:0005515/GO:0006914/GO:0042802/GO:0016020/GO:0034045/GO:0005789/GO:0044877/GO:0075044/GO:0010506/GO:0000045/GO:0005776/GO:0000407/GO:0008104/GO:0046777/GO:0005741/GO:0031175/GO:0016241/GO:0016236/GO:1990316/GO:0032045/GO:0017137/GO:0051020/GO:0007409/GO:0018105/GO:0018107/GO:…	cellular_component/molecular_function/biological_process
ENSG00000107738	1	-1.21335	1.21335	-0.166675	0.166675	0.570877	5.65959e-05	ENSG00000107738	V-set immunoregulatory receptor [Source:HGNC Symbol;Acc:HGNC:30085]	VSIR		GO:0016020/GO:0016021/GO:0005886/GO:0042802/GO:0010628/GO:0030335/GO:0019899/GO:0032689/GO:0032720/GO:2000562/GO:0061133/GO:0032693/GO:0031638/GO:0045591/GO:0010950/GO:0032700/GO:0120158/GO:2000565	cellular_component/molecular_function/biological_process
ENSG00000167676	1	-1.21332	1.21332	-0.16691	0.16691	1.41254	2.07056e-05	ENSG00000167676	perilipin 4 [Source:HGNC Symbol;Acc:HGNC:29393]	PLIN4		GO:0043231/GO:0005829/GO:0005886/GO:0005811/GO:0005737/GO:0016020	cellular_component	/A0A0J9YXN7
ENSG00000145241	1	-1.2131	1.2131	-0.168478	0.168478	0.531593	1.25622e-05	ENSG00000145241	centromere protein C [Source:HGNC Symbol;Acc:HGNC:1854]	CENPC		GO:0005634/GO:0005829/GO:0005654/GO:0003677/GO:0051301/GO:0005694/GO:0045171/GO:0007049/GO:0016604/GO:0030496/GO:0000776/GO:0007059/GO:0000775/GO:0000777/GO:0051382/GO:0034080/GO:0032154/GO:0019237/GO:0090543/GO:0000278/GO:0051315/GO:0000778/GO:0005721/GO:0000780/GO:0051455/GO:0031618	cellular_component/molecular_function/biological_process	H0Y8J2//H0Y9W1
ENSG00000228502	1	-1.21303	1.21303	-0.168995	0.168993	0.962893	2.63034e-05
ENSG00000198585	1	-1.21303	1.213	0.169131	-0.169103	0.332886	0.000774422	ENSG00000198585	nudix hydrolase 16 [Source:HGNC Symbol;Acc:HGNC:26442]	NUDT16		GO:0003723/GO:0005634/GO:0005737/GO:0046872/GO:0000166/GO:0005730/GO:0016787/GO:0005525/GO:0016311/GO:0042803/GO:0006508/GO:0000287/GO:0005654/GO:0009117/GO:0042802/GO:0003729/GO:0098519/GO:0090502/GO:0008284/GO:0034656/GO:0006402/GO:0090068/GO:0030145/GO:0031404/GO:0030515/GO:0008235/GO:0006382/GO:2000781/GO:0050072/GO:0035870/GO:0050897/GO:0097383/GO:1901640/GO:1901641/GO:1990003/GO:1990174/GO:…	molecular_function/cellular_component/biological_process
ENSG00000237149	1	-1.21284	1.21284	-0.170321	0.170321	1.02218	0.000761658
ENSG00000227110	1	-1.21284	1.21284	0.170355	-0.170355	2.19778	7.51548e-06
ENSG00000141441	1	-1.21284	1.21284	-0.170359	0.17036	1.8777	1.25869099545757e-42	ENSG00000141441	GRB2 associated regulator of MAPK1 subtype 1 [Source:HGNC Symbol;Acc:HGNC:26136]	GAREM1		/GO:0005886/GO:0005515/GO:0051781/GO:0008284/GO:0070374/GO:0070064/GO:0007173/GO:0071364	/cellular_component/molecular_function/biological_process	J3QRF3/
ENSG00000001629	1	-1.2128	1.21277	-0.170711	0.170747	0.406416	1.14888e-05	ENSG00000001629	ankyrin repeat and IBR domain containing 1 [Source:HGNC Symbol;Acc:HGNC:22215]	ANKIB1		GO:0046872/GO:0016740/GO:0004842/GO:0005515/GO:0016567/GO:0005737/GO:0006511/GO:0000151/GO:0061630/GO:0000209/GO:0031624/GO:0032436/	molecular_function/biological_process/cellular_component/	H7C0S0//H7C2V2/C9JZ63/H7C2L9
ENSG00000162434	1	-1.21276	1.21276	-0.170906	0.170906	0.895393	1.58439609367e-38	ENSG00000162434	Janus kinase 1 [Source:HGNC Symbol;Acc:HGNC:6190]	JAK1	04660+2.7.10.2	GO:0005737/GO:1903672/GO:0005634/GO:0016020/GO:0046872/GO:0000166/GO:0004672/GO:0005524/GO:0006468/GO:0016740/GO:0016301/GO:0016310/GO:0035556/GO:0004713/GO:0018108/GO:0005856/GO:0005515/GO:0004715/GO:0005925/GO:0005829/GO:0012505/GO:0031625/GO:0019221/GO:0035722/GO:0019903/GO:0005088/GO:0000165/GO:0060333/GO:0038111/GO:0060334/GO:0070102/GO:0060337/GO:0005131/GO:0046677/GO:0070106/GO:0070757/GO:…	cellular_component/biological_process/molecular_function
ENSG00000078070	1	-1.21259	1.21259	-0.172137	0.172137	0.445197	1.36722e-05	ENSG00000078070	methylcrotonoyl-CoA carboxylase 1 [Source:HGNC Symbol;Acc:HGNC:6936]	MCCC1		GO:0000166/GO:0005524/GO:0005739/GO:0046872/GO:0016874/GO:0005759/GO:0005515/GO:0005829/GO:0006768/GO:0006552/GO:0009374/GO:0004485/GO:0004075/GO:0051291/GO:0002169/GO:1905202/	molecular_function/cellular_component/biological_process/	F2Z2Z7/E9PG35/E9PHF7/G5E9X5/F8WF46/F5GYT8/A0A0S2Z693/F2Z3E2/F8WDI3	path:hsa00280/path:hsa01100	hsa:56922	ko:K01968	Valine leucine and isoleucine degradation - Homo sapiens (human)/Metabolic pathways - Homo sapiens (human)
ENSG00000118156	1	-1.21244	1.21244	0.173164	-0.173164	2.39123	5.86384434918058e-15	ENSG00000118156	zinc finger protein 541 [Source:HGNC Symbol;Acc:HGNC:25294]	ZNF541		GO:0003676/GO:0005634/GO:0046872/GO:0003677/GO:0007275/GO:0006355/GO:0030154/GO:0007283/GO:0006357/GO:0003700/GO:0000981/GO:0008134/GO:0005667/GO:0000118/GO:0044212	molecular_function/cellular_component/biological_process	/M0R167/A0A075B6F0/H7BXG6
ENSG00000086619	1	-1.21236	1.21236	0.173763	-0.173763	1.80288	9.85969162180591e-18	ENSG00000086619	endoplasmic reticulum oxidoreductase 1 beta [Source:HGNC Symbol;Acc:HGNC:14355]	ERO1B		GO:0016020/GO:0016491/GO:0055114/GO:0005783/GO:0005789/GO:0005515/GO:0016671/GO:0006457/GO:0003756/GO:0051082/GO:0015035/GO:0034975/GO:0019471/GO:0022417/GO:0030070/GO:0030198/GO:0042593/GO:0045454	cellular_component/molecular_function/biological_process	/Q5TAE8/Q5T1H5
ENSG00000182568	1	-1.2123	1.2123	-0.17412	0.17412	6.22403	7.01443253801635e-40	ENSG00000182568	SATB homeobox 1 [Source:HGNC Symbol;Acc:HGNC:10541]	SATB1		GO:0005634/GO:0005654/GO:0006325/GO:0003677/GO:0005515/GO:0016604/GO:0043565/GO:0000981/GO:0016032/GO:0016363/GO:0016605/GO:0000977/GO:0001227/GO:0000122/GO:0003690/GO:0003682/GO:0003700/GO:0006338/GO:0006355/GO:0008544/GO:0016571/GO:0042110/GO:0043367/GO:0043374/GO:0050798/GO:0060004/GO:0000785/GO:0005720/	cellular_component/biological_process/molecular_function/	C9IZC5/C9JP21/C9JGL9/C9J3I0/C9JLL5//A0A1D5RMP0/A0A024R2H1/C9J7F3/A0A087WW75/A0A087WW22/H0YN86		hsa:6304	ko:K23225
ENSG00000164749	1	-1.2122	1.2122	-0.174847	0.174847	2.8643	2.03420234072658e-7	ENSG00000164749	hepatocyte nuclear factor 4 gamma [Source:HGNC Symbol;Acc:HGNC:5026]	HNF4G		GO:0005634/GO:0008270/GO:0046872/GO:0006355/GO:0003677/GO:0003700/GO:0043565/GO:0003707/GO:0004879/GO:0030522/GO:0043401/GO:0000981/GO:0000978/GO:0005654/GO:0045944/GO:0006367/GO:0006357/GO:0001077/GO:0006351	cellular_component/molecular_function/biological_process	/F1D8Q4
ENSG00000250506	1	-1.21217	1.21217	0.175025	-0.175025	0.756383	1.13703e-05	ENSG00000250506	cyclin dependent kinase 3 [Source:HGNC Symbol;Acc:HGNC:1772]	CDK3		GO:0000166/GO:0004672/GO:0004674/GO:0005524/GO:0006468/GO:0016740/GO:0016301/GO:0016310/GO:0051301/GO:0005515/GO:0007049/GO:0051726/GO:0005634/GO:0008283/GO:0045023/GO:0006974/GO:0004693/GO:0000082	molecular_function/biological_process/cellular_component	/K7ELV5/K7EJ83
ENSG00000165795	1	-1.21213	1.21213	0.175362	-0.175362	0.692549	4.90308e-05	ENSG00000165795	NDRG family member 2 [Source:HGNC Symbol;Acc:HGNC:14460]	NDRG2		GO:0005737/GO:0005829/GO:0042995/GO:0005515/GO:0007275/GO:0016055/GO:0048471/GO:0030154/GO:0007165/GO:0007399/GO:0030426/GO:0070062/GO:0003674/GO:0021762/GO:0005794//GO:0001818/GO:0010574/GO:0048662/GO:0070373/GO:0090361/GO:0005634/GO:0016020/GO:0016021	cellular_component/molecular_function/biological_process/	G3V3X3/H0YJT9/G3V3X2/G3V2I9/G3V271/G3V5B7/G3V5S0/G3V5V9/G3V3P6/G3V358/H0YJ56/G3V3L1/G3V5P9//G3V280/G3V5A6/G3V2S0/G3V5L7/G3V5B5/H7C0X0/G3V383/G3V237/G3V5G0/G3V3P1/G3V239/G3V392/G3V2A6/G3V4S2/G3V5H8/G3V4S9/A0A0A0MS87/G3V3D5/G3V5D7/G3V4X3/G3V2Y3/G3V5G7/G3V420/G3V285/G3V2T2/G3V3C3/G3V578/G3V552/A0A0U1RR50/G3V4T9
ENSG00000276116	1	-1.21194	1.21194	0.176636	-0.176638	1.22361	4.23630922768087e-9
ENSG00000157214	1	-1.21167	1.21167	0.17847	-0.17847	1.68789	1.72905979411256e-16	ENSG00000157214	STEAP2 metalloreductase [Source:HGNC Symbol;Acc:HGNC:17885]	STEAP2		/GO:0016020/GO:0016021/GO:0046872/GO:0016491/GO:0055114/GO:0005829/GO:0006811/GO:0005886/GO:0005768/GO:0006897/GO:0005769/GO:0010008/GO:0030173/GO:0030140/GO:0045055/GO:0005215/GO:0006893/GO:0055072/GO:0009725/GO:0008823/GO:0052851/GO:0015677/GO:0098706	/cellular_component/molecular_function/biological_process	/C9JHX5/B5MC02/C9JLP2/Q6YPB2	path:hsa04978	hsa:261729	ko:K14738	Mineral absorption - Homo sapiens (human)
ENSG00000144559	1	-1.2116	1.2116	-0.178976	0.178976	1.0636	1.06283431444671e-18	ENSG00000144559	TAM41 mitochondrial translocator assembly and maintenance homolog [Source:HGNC Symbol;Acc:HGNC:25187]	TAMM41	00564+2.7.7.41/04070+2.7.7.41/	GO:0016020/GO:0016740/GO:0005743/GO:0006629/GO:0005739/GO:0005515/GO:0008654/GO:0016779/GO:0032049/GO:0004605/GO:0016024/GO:0031314	cellular_component/molecular_function/biological_process	/H7C1A2/B4E101/G3V0F3
ENSG00000139636	1	-1.21135	1.21135	0.180621	-0.180621	0.73359	1.31921e-06	ENSG00000139636	limb development membrane protein 1 like [Source:HGNC Symbol;Acc:HGNC:18268]	LMBR1L		GO:0016020/GO:0016021/GO:0005886/GO:0007165/GO:0005887/GO:0005515/GO:0006897/GO:0004888/GO:0006898/	cellular_component/biological_process/molecular_function/	F8VYZ9/F8VVE2/H0YHY8//F8WE63/F8W054/H0YHZ2/F8VZU8/F8VPB1/F8W0N6/E7ESX7/H0YI83/H0YIX2
ENSG00000171033	1	-1.2112	1.2112	-0.181653	0.181653	0.967578	9.92243657141104e-7	ENSG00000171033	cAMP-dependent protein kinase inhibitor alpha [Source:HGNC Symbol;Acc:HGNC:9017]	PKIA		GO:2000480/GO:0016301/GO:0016310/GO:0005515/GO:0004860/GO:0004862/GO:0034236/GO:0000122/GO:0006469/GO:0010389/GO:0042308/GO:0043086/GO:0071901/GO:0005634/GO:0005737	biological_process/molecular_function/cellular_component	A0A024R7Y9	path:hsa05034	hsa:5569	ko:K15985	Alcoholism - Homo sapiens (human)
ENSG00000119820	1	-1.21116	1.21119	0.181806	-0.181841	0.479317	3.92963e-05	ENSG00000119820	Yip1 domain family member 4 [Source:HGNC Symbol;Acc:HGNC:28145]	YIPF4		GO:0016020/GO:0016021/GO:0005794/GO:0043231/GO:0005886/GO:0005515/GO:0005783/	cellular_component/molecular_function/	H7C3X2//H7C0D5
ENSG00000107551	1	-1.21115	1.21115	-0.181969	0.181969	1.0837	6.50200373727127e-14	ENSG00000107551	Ras association domain family member 4 [Source:HGNC Symbol;Acc:HGNC:20793]	RASSF4		GO:0007165/GO:0005515/GO:0007049/	biological_process/molecular_function/	R4GNA4/Q5T737//V9GYK1/Q5T739
ENSG00000214655	1	-1.21095	1.21095	-0.183324	0.183324	0.915239	4.80626460608578e-20	ENSG00000214655	zinc finger SWIM-type containing 8 [Source:HGNC Symbol;Acc:HGNC:23528]	ZSWIM8		GO:0008270/GO:0046872/GO:1902667/GO:0031462/	molecular_function/biological_process/cellular_component/	S4R3U7/S4R3B3//S4R393/H0YCW2/H7BZ52/S4R3S6/S4R410/H7C453/S4R3H3
ENSG00000176142	1	-1.21094	1.21096	0.183273	-0.183292	0.61232	7.22874425072819e-13	ENSG00000176142	transmembrane protein 39A [Source:HGNC Symbol;Acc:HGNC:25600]	TMEM39A		/GO:0016020/GO:0016021	/cellular_component	C9IYN1/C9K0C7/F8WAU1/C9JUZ6/C9JYN8//H7C5P7
ENSG00000225733	1	-1.21091	1.21091	-0.183545	0.183545	1.05177	3.73887499398674e-79
ENSG00000184678	1	-1.21087	1.21087	-0.183829	0.183828	0.999093	0.00019323	ENSG00000184678	histone cluster 2 H2B family member e [Source:HGNC Symbol;Acc:HGNC:4760]	HIST2H2BE		GO:0005634/GO:0005829/GO:0005654/GO:0003677/GO:0046982/GO:0006334/GO:0000786/GO:0005694/GO:0005615/GO:0042742/GO:0070062/GO:0050830/GO:0061844/GO:0019731/GO:0002227	cellular_component/molecular_function/biological_process
ENSG00000142197	1	-1.21071	1.21068	-0.184968	0.185	0.434389	0.00096633	ENSG00000142197	DOP1 leucine zipper like protein B [Source:HGNC Symbol;Acc:HGNC:1291]	DOP1B		/GO:0015031/GO:0005829/GO:0007275/GO:0005768/GO:0070062/GO:0003674/GO:0005802/GO:0006895/GO:0050890/GO:0000139/GO:0007029	/biological_process/cellular_component/molecular_function	/F8W8U9
ENSG00000102081	1	-1.21065	1.21065	0.185306	-0.185306	0.281674	0.000899061	ENSG00000102081	fragile X mental retardation 1 [Source:HGNC Symbol;Acc:HGNC:3775]	FMR1		GO:0003676/GO:0003723/GO:0006397/GO:0008380/GO:0051028/GO:0005634/GO:0005737/GO:0016020/GO:0005829/GO:0005694/GO:1904115/GO:0042803/GO:0005886/GO:0042995/GO:0005515/GO:0006974/GO:0048471/GO:0030054/GO:0045202/GO:0045211/GO:0005654/GO:0043022/GO:0045727/GO:0005730/GO:0031047/GO:0030425/GO:0008017/GO:0042802/GO:0000775/GO:0007399/GO:0003729/GO:0030424/GO:0030426/GO:0043204/GO:0098586/GO:0006417/GO:…	molecular_function/biological_process/cellular_component/	A0A087X1M7/R9WNI0/A0A087WWR6/G3V0J0/Q8IXW7/A0A087WWU4/A0A087WXC0//A8MQB8/A0A087WY29/A0A087WXI3
ENSG00000170365	1	-1.20999	1.20999	-0.189533	0.189533	0.857884	5.74492641568339e-12	ENSG00000170365	SMAD family member 1 [Source:HGNC Symbol;Acc:HGNC:6767]	SMAD1		GO:0005634/GO:0006355/GO:0003700/GO:0005622/GO:0007179/GO:0005667/GO:0010628/GO:0045944/GO:0005737/GO:1903672/GO:0030509/GO:0016021/GO:0046872/GO:0006366/GO:0003677/GO:0005515/GO:0007165/GO:0042802/GO:0000981/GO:0000978/GO:0005654/GO:0005829/GO:0005637/GO:0019901/GO:0016579/GO:0032991/GO:0070410/GO:0001077/GO:0070411/GO:0030618/GO:0060395/GO:1901522/GO:0071141/GO:0007183/GO:0070878/GO:0009880/GO:…	cellular_component/biological_process/molecular_function/	D6RAY1/D6RD62/D6RDN7/A0A1D5RMR4//D6REQ3/D6RBH9
ENSG00000065361	1	-1.20999	1.20999	0.189537	-0.189537	1.01633	3.16126822716256e-12	ENSG00000065361	erb-b2 receptor tyrosine kinase 3 [Source:HGNC Symbol;Acc:HGNC:3431]	ERBB3		/GO:0005615/GO:0014068/GO:0007162/GO:0016020/GO:0016021/GO:0000166/GO:0004672/GO:0005524/GO:0006468/GO:0016740/GO:0016301/GO:0016310/GO:0007169/GO:0018108/GO:0005886/GO:0005515/GO:0007165/GO:0005576/GO:0046854/GO:0042802/GO:0005737/GO:0005887/GO:0030154/GO:0004713/GO:0004714/GO:0004888/GO:0009968/GO:0043066/GO:0043410/GO:0070374/GO:0043235/GO:0042803/GO:0046982/GO:0046934/GO:0051897/GO:0005088/GO…	/cellular_component/biological_process/molecular_function	O75812//F8VW56/F8VRL0/F8VX90/A0A2R8Y6T4/F8VW48/F8VRI5/B4DGQ7/B3KWG5/F8VYK4
ENSG00000111269	1	-1.20997	1.20997	-0.189695	0.189695	0.762764	7.0156926386057e-18	ENSG00000111269	cAMP responsive element binding protein like 2 [Source:HGNC Symbol;Acc:HGNC:2350]	CREBL2		GO:0005634/GO:0006355/GO:0003677/GO:0003700/GO:0007049/GO:0030154/GO:0045893/GO:0006357/GO:0000981/GO:0033138/GO:0050821/GO:0007165/GO:0006351/GO:0045600/GO:0046326/GO:0046889	cellular_component/biological_process/molecular_function
ENSG00000088340	1	-1.20984	1.20984	-0.190501	0.190501	0.952928	5.27604e-05
ENSG00000102554	1	-1.20971	1.20971	-0.191334	0.191334	0.781011	4.24601821152592e-9	ENSG00000102554	Kruppel like factor 5 [Source:HGNC Symbol;Acc:HGNC:6349]	KLF5		GO:0003676/GO:0005634/GO:0005794/GO:0043231/GO:0046872/GO:0005654/GO:0006355/GO:0003677/GO:0003700/GO:0005515/GO:0000981/GO:0006357/GO:0000978/GO:0045944/GO:0006366/GO:0001077/GO:1902895/GO:0008134/GO:0043565/GO:0000122/GO:0001525/GO:0008284/GO:0030033/GO:0032534/GO:0035914/GO:0045600/GO:0045893/GO:0060576/GO:0071407/GO:0099156/GO:1901653/GO:1990830	molecular_function/cellular_component/biological_process	/Q5T6X2		hsa:688	ko:K09206
ENSG00000241553	1	-1.20962	1.20962	-0.191892	0.191892	1.11887	1.6589099389701e-47	ENSG00000241553	actin related protein 2/3 complex subunit 4 [Source:HGNC Symbol;Acc:HGNC:707]	ARPC4		GO:0005737/GO:0003779/GO:0015629/GO:0005856/GO:0042995/GO:0005515/GO:0030041/GO:0030833/GO:0034314/GO:0005885/GO:0038096/GO:0005829/GO:0051015/GO:0070062/GO:0030674/GO:0061024/GO:0048013/GO:0019899/GO:0005200/GO:0045010	cellular_component/molecular_function/biological_process	F8WDW3/R4GN08//F8WDD7
ENSG00000187231	1	-1.2096	1.2096	-0.192034	0.192034	0.855559	9.74354058158824e-14	ENSG00000187231	SEC14 and spectrin domain containing 1 [Source:HGNC Symbol;Acc:HGNC:18379]	SESTD1		GO:0045111/GO:0005515/GO:0010314/GO:0032266/GO:0080025/GO:0005546/GO:0043325/GO:0070300/GO:0070273/GO:0034704/GO:1904878/	cellular_component/molecular_function/biological_process/	C9J4X8//F8WFB2/H0Y774/C9JHW6/H7BZR8/H7BXT9
ENSG00000178401	1	-1.20956	1.20955	-0.192291	0.192293	0.620556	2.39873259775939e-7	ENSG00000178401	DnaJ heat shock protein family (Hsp40) member C22 [Source:HGNC Symbol;Acc:HGNC:25802]	DNAJC22		GO:0016020/GO:0016021	cellular_component	A0A024R0Z2		hsa:79962	ko:K19370
ENSG00000108064	1	-1.20954	1.20954	-0.192412	0.192412	0.901695	9.57769988653861e-27	ENSG00000108064	transcription factor A mitochondrial [Source:HGNC Symbol;Acc:HGNC:11741]	TFAM		GO:0003723/GO:0005634/GO:0005739/GO:0003677/GO:0003700/GO:0005515/GO:0005759/GO:0006355/GO:0045893/GO:0043565/GO:0005829/GO:0003682/GO:0032991/GO:0001223/GO:0031072/GO:0006390/GO:0033108/GO:0042645/GO:0006391/GO:0007005/GO:0008301/GO:0001018	molecular_function/cellular_component/biological_process	/E5KSU5/H7BYN3	path:hsa04371/path:hsa05016	hsa:7019	ko:K11830	Apelin signaling pathway - Homo sapiens (human)/Huntington disease - Homo sapiens (human)
ENSG00000169604	1	-1.20924	1.20924	-0.194237	0.194237	1.15585	2.70494503043147e-14	ENSG00000169604	ANTXR cell adhesion molecule 1 [Source:HGNC Symbol;Acc:HGNC:21014]	ANTXR1		GO:0016020/GO:0016021/GO:0046872/GO:0005886/GO:0042995/GO:0005515/GO:0009986/GO:0038023/GO:0004888/GO:0051015/GO:0010008/GO:1901998/GO:0031532/GO:0005518/GO:0034446/GO:0009897/GO:0031527/GO:0031258/GO:0001568/GO:0022414/GO:1901202/GO:1905050	cellular_component/molecular_function/biological_process	H0YC24/
ENSG00000135506	1	-1.20923	1.20923	-0.194346	0.194346	0.504908	1.10408575928371e-13	ENSG00000135506	OS9 endoplasmic reticulum lectin [Source:HGNC Symbol;Acc:HGNC:16994]	OS9		GO:0005783/GO:0030246/GO:0016567/GO:0005515/GO:0044322/GO:0006511/GO:0005789/GO:0030433/GO:1904380/GO:0055085/GO:0034976/GO:0005788/GO:0006621/GO:0030970/GO:1904153/GO:0000836/GO:0002020/GO:0006605/	cellular_component/molecular_function/biological_process/	F8VZI7/B4E321/F8VWQ2/F8W0R2/F8W1V2/F8W1N0/
ENSG00000215182	1	-1.20916	1.20916	-0.194739	0.19474	5.23484	2.13056471883724e-24	ENSG00000215182	mucin 5AC oligomeric mucus/gel-forming [Source:HGNC Symbol;Acc:HGNC:7515]	MUC5AC		GO:0005737/GO:0005576/GO:0005615/GO:0048015/GO:0005886/GO:0070062/GO:0005796/GO:0002223/GO:0016266/GO:0005201/GO:0070701	cellular_component/biological_process/molecular_function
ENSG00000266412	1	-1.20885	1.20885	-0.196668	0.196668	0.417061	2.29057e-05	ENSG00000266412	nuclear receptor coactivator 4 [Source:HGNC Symbol;Acc:HGNC:7671]	NCOA4		GO:0003713/GO:0045893/GO:0005634/GO:0030521/GO:0050681/GO:0008584/GO:0044754/GO:0006622//GO:0006879	molecular_function/biological_process/cellular_component/	A0A024QZI5/B4DF87/B4DZ85/	path:hsa04216/path:hsa05216/path:hsa05200	hsa:8031	ko:K09289	Ferroptosis - Homo sapiens (human)/Thyroid cancer - Homo sapiens (human)/Pathways in cancer - Homo sapiens (human)
ENSG00000234741	1	-1.20881	1.20881	-0.196907	0.196907	0.622536	3.74446201315168e-11
ENSG00000030419	1	-1.2088	1.2088	0.196958	-0.196958	0.837606	0.000972637	ENSG00000030419	IKAROS family zinc finger 2 [Source:HGNC Symbol;Acc:HGNC:13177]	IKZF2		GO:0003676/GO:0005634/GO:0046872/GO:0003677/GO:0005515/GO:0003700/GO:0000981/GO:0045944/GO:0003674/GO:0008150/GO:0005654/GO:0044212/GO:0042803/	molecular_function/cellular_component/biological_process/	E7EPU0//E7EUI1/A0A0A0MSL2/A0A0A0MT14/B4DWF2/E7ES26
ENSG00000154767	1	-1.20856	1.20856	0.198444	-0.198444	0.97321	1.01136484943082e-21	ENSG00000154767	XPC complex subunit DNA damage recognition and repair factor [Source:HGNC Symbol;Acc:HGNC:12816]	XPC		GO:0005634/GO:0005737/GO:0043231/GO:0005730/GO:0005739/GO:0003677/GO:0005886/GO:0003684/GO:0005515/GO:0006281/GO:0006974/GO:0006289/GO:0005654/GO:0044877/GO:1901990/GO:0003697/GO:0006298/GO:0000405/GO:0070911/GO:0000109/GO:0000715/GO:0006294/GO:0071942/GO:0000404/GO:0010224/GO:0010996/GO:0031573/GO:0042493/GO:0070914/GO:0000111	cellular_component/molecular_function/biological_process	X5DRB1/E7EUB5/	path:hsa03420	hsa:7508	ko:K10838	Nucleotide excision repair - Homo sapiens (human)
ENSG00000111731	1	-1.20834	1.20833	0.199814	-0.199798	0.720856	8.00496798610195e-14	ENSG00000111731	C2 calcium dependent domain containing 5 [Source:HGNC Symbol;Acc:HGNC:29062]	C2CD5		GO:0005737/GO:0016020/GO:0015031/GO:0005829/GO:0005886/GO:0042995/GO:0005815/GO:0031410/GO:0030659/GO:0005544/GO:0005509/GO:0008289/GO:0005938/GO:0032587/GO:0090314/GO:0001726/GO:0032869/GO:0010828/GO:0031340/GO:0038028/GO:0065002/GO:0006906/GO:0072659/GO:2001275	cellular_component/biological_process/molecular_function	H0YGU7//H0YFE9/H0YFC4
ENSG00000137193	1	-1.20826	1.20826	0.200283	-0.200283	1.73597	1.53444939019167e-95	ENSG00000137193	Pim-1 proto-oncogene serine/threonine kinase [Source:HGNC Symbol;Acc:HGNC:8986]	PIM1	05165+2.7.11.1/04150+2.7.11.1/04926+2.7.11.1/04714+2.7.11.1/04151+2.7.11.1	GO:0060045/GO:0005737/GO:0005634/GO:0016020/GO:0046872/GO:0000166/GO:0004672/GO:0004674/GO:0005524/GO:0006468/GO:0043066/GO:0005730/GO:0005829/GO:0016740/GO:0016301/GO:0016310/GO:0005886/GO:0005515/GO:0007049/GO:0006915/GO:0030212/GO:0005654/GO:0008283/GO:0007275/GO:0008134/GO:0043433/GO:0019221/GO:0046777/GO:0043024/GO:0030145/GO:0070561/GO:1905062	biological_process/cellular_component/molecular_function	A0A024RD25	path:hsa05200/path:hsa04933/path:hsa04630/path:hsa05221/path:hsa05206	hsa:5292	ko:K04702	Pathways in cancer - Homo sapiens (human)/AGE-RAGE signaling pathway in diabetic complications - Homo sapiens (human)/JAK-STAT signaling pathway - Homo sapiens (human)/Acute myeloid leukemia - Homo sapiens (human)/MicroRNAs in cancer - Homo sapiens (human)
ENSG00000180537	1	-1.20822	1.20822	0.200514	-0.200514	2.60691	1.67885314096039e-11	ENSG00000180537	ring finger protein 182 [Source:HGNC Symbol;Acc:HGNC:28522]	RNF182		/GO:0005737/GO:0016020/GO:0016021/GO:0046872/GO:0016740/GO:0016567/GO:0005515/GO:0004842	/cellular_component/molecular_function/biological_process	C9JVS8/A0A024QZW5/C9IZ30/C9JAK6/C9JAJ3		hsa:221687	ko:K11983
ENSG00000148053	1	-1.2082	1.2082	-0.200647	0.200647	2.06064	2.79276710540827e-18	ENSG00000148053	neurotrophic receptor tyrosine kinase 2 [Source:HGNC Symbol;Acc:HGNC:8032]	NTRK2		GO:0001934/GO:0005737/GO:0016020/GO:0016021/GO:0000166/GO:0004672/GO:0005524/GO:0006468/GO:0016740/GO:0016301/GO:0016310/GO:0004713/GO:0007169/GO:0018108/GO:0005887/GO:0042803/GO:0005886/GO:0042995/GO:0005515/GO:0004714/GO:0005030/GO:0007275/GO:0048471/GO:0030154/GO:0030425/GO:0007399/GO:0004888/GO:0009968/GO:0043066/GO:0043410/GO:0070374/GO:0043235/GO:0005768/GO:0030424/GO:0005769/GO:0010628/GO:…	biological_process/cellular_component/molecular_function	A0A024R230/Q548C2/Q5VWE5/	path:hsa04151/path:hsa04722/path:hsa04014/path:hsa05034/path:hsa04010	hsa:4915	ko:K04360	PI3K-Akt signaling pathway - Homo sapiens (human)/Neurotrophin signaling pathway - Homo sapiens (human)/Ras signaling pathway - Homo sapiens (human)/Alcoholism - Homo sapiens (human)/MAPK signaling pathway - Homo sapiens (human)
ENSG00000114670	1	-1.20808	1.20808	-0.201359	0.201359	1.09546	2.87385971856253e-7	ENSG00000114670	NIMA related kinase 11 [Source:HGNC Symbol;Acc:HGNC:18593]	NEK11		GO:0004672/GO:0005524/GO:0006468/GO:0005634/GO:0046872/GO:0000166/GO:0004674/GO:0005654/GO:0016740/GO:0016301/GO:0016310/GO:0005515/GO:0007049/GO:0005730/GO:0035556/GO:0031573/GO:0016572/GO:0044772/GO:1901990/	molecular_function/biological_process/cellular_component/	D6RJF7/E9PHI8/A0A075B7B3/D6RGV6/
ENSG00000138207	1	-1.20799	1.20799	0.201868	-0.201868	1.9489	1.32029410669418e-34	ENSG00000138207	retinol binding protein 4 [Source:HGNC Symbol;Acc:HGNC:9922]	RBP4		GO:0005615/GO:0060044/GO:0042593/GO:0005515/GO:0005576/GO:0050896/GO:0005829/GO:0070062/GO:0007601/GO:0034632/GO:0032024/GO:0001523/GO:0007507/GO:0032526/GO:0030324/GO:0016918/GO:0060347/GO:0005501/GO:0019841/GO:0001654/GO:0006094/GO:0030277/GO:0034633/GO:0042572/GO:0048562/GO:0048706/GO:0048738/GO:0048807/GO:0051024/GO:0060059/GO:0060065/GO:0060068/GO:0060157/GO:0046982/GO:0045471/GO:0032991	cellular_component/biological_process/molecular_function	/Q5VY30
ENSG00000100600	1	-1.20786	1.20783	0.202769	-0.202743	0.48057	4.79370235509098e-10	ENSG00000100600	legumain [Source:HGNC Symbol;Acc:HGNC:9472]	LGMN		GO:0016787/GO:0008233/GO:0008234/GO:0006508/GO:0005764/GO:0070062/GO:0004197/GO:0019886/GO:0005737/GO:1904646/GO:0043202/GO:0042359/GO:0051603/GO:0003014/GO:1900273/GO:0010629/GO:0005576/GO:0048471/GO:0007613/GO:0036021/GO:0043524/GO:0090026/GO:0097061/GO:0032801/GO:0071277/GO:0008306/GO:0097202/GO:0006624/GO:0008284/GO:0010447/GO:0035729/GO:0045931/GO:0097264/GO:1901185/GO:2001028/GO:0005770/GO:…	molecular_function/biological_process/cellular_component/	Q53XC6/G3V2E9/G3V263/G3V4E4/G3V5B2/G3V4P5/G3V3Z4/H0YJN9/G3V2T4/	path:hsa04612/path:hsa04142	hsa:5641	ko:K01369	Antigen processing and presentation - Homo sapiens (human)/Lysosome - Homo sapiens (human)
ENSG00000171105	1	-1.20772	1.20772	-0.203528	0.203528	1.57357	8.90355398830061e-16	ENSG00000171105	insulin receptor [Source:HGNC Symbol;Acc:HGNC:6091]	INSR		GO:0008284/GO:0046326/GO:0051897/GO:0030335/GO:0001934/GO:0032148/GO:0032869/GO:0042593/GO:0016020/GO:0016021/GO:0000166/GO:0004672/GO:0005524/GO:0006468/GO:0016740/GO:0016301/GO:0016310/GO:0004713/GO:0007169/GO:0005886/GO:0005515/GO:0004714/GO:0005975/GO:0046777/GO:0005737/GO:0005887/GO:0030154/GO:0004888/GO:0009968/GO:0043066/GO:0070374/GO:0043235/GO:0070062/GO:0010008/GO:0043548/GO:0043560/GO:…	biological_process/cellular_component/molecular_function/	M0R3E6/
ENSG00000135148	1	-1.20769	1.20769	0.20368	-0.20368	0.335736	4.95331e-06	ENSG00000135148	TRAF-type zinc finger domain containing 1 [Source:HGNC Symbol;Acc:HGNC:24808]	TRAFD1		GO:0046872/GO:0005515/GO:0045824/	molecular_function/biological_process/	/A0A024RBK4/F8VNX8/F8VWK2/S4R2Z9/F8VVF3		hsa:10906
ENSG00000171135	1	-1.20765	1.20765	-0.203896	0.203896	1.47859	1.97828655731667e-54	ENSG00000171135	jagunal homolog 1 [Source:HGNC Symbol;Acc:HGNC:26926]	JAGN1		GO:0016020/GO:0016021/GO:0015031/GO:0005783/GO:0005789/GO:0005515/GO:0002376/GO:0016192/GO:0006887/GO:0007029/GO:0038158/GO:0002446/GO:0030223/GO:0050832/GO:0061179/GO:1904577/GO:1990266/	cellular_component/biological_process/molecular_function/
ENSG00000162366	1	-1.20755	1.20755	-0.204504	0.204504	1.93952	1.08272778061215e-26	ENSG00000162366	PDZK1 interacting protein 1 [Source:HGNC Symbol;Acc:HGNC:16887]	PDZK1IP1		GO:0016020/GO:0016021/GO:0070062	cellular_component
ENSG00000077254	1	-1.20753	1.20753	-0.204597	0.204597	0.402054	4.77055e-05	ENSG00000077254	ubiquitin specific peptidase 33 [Source:HGNC Symbol;Acc:HGNC:20059]	USP33		GO:0005737/GO:0005794/GO:0008270/GO:0046872/GO:0005654/GO:0004843/GO:0016579/GO:0016787/GO:0005925/GO:0005856/GO:0005515/GO:0008233/GO:0008234/GO:0006508/GO:0006511/GO:0036459/GO:0048471/GO:0005813/GO:0005815/GO:0005829/GO:0006897/GO:0016477/GO:0009267/GO:0070536/GO:0071108/GO:0017160/GO:0001664/GO:0032092/GO:0010506/GO:0007411/GO:0032091/GO:0051298/GO:0004197/GO:0008277/GO:0050821/GO:0030891/GO:…	cellular_component/molecular_function/biological_process	E9PQP0//H0YD08/E9PLK7/H0YCV3/E9PP47
ENSG00000087470	1	-1.20733	1.20733	-0.205815	0.205815	0.348867	8.91138e-05	ENSG00000087470	dynamin 1 like [Source:HGNC Symbol;Acc:HGNC:2973]	DNM1L		GO:0005737/GO:0016020/GO:0043231/GO:0000166/GO:0005829/GO:0016787/GO:0003924/GO:0005525/GO:0005794/GO:0005739/GO:0042803/GO:0043547/GO:0005515/GO:0048471/GO:0030054/GO:0031410/GO:0045202/GO:0005741/GO:0016559/GO:0005905/GO:0008289/GO:0005777/GO:0098794/GO:0005783/GO:0006897/GO:0008017/GO:0012505/GO:0032991/GO:0043065/GO:0031625/GO:0000266/GO:0001836/GO:1903146/GO:0030742/GO:0051259/GO:0005874/GO:…	cellular_component/molecular_function/biological_process	F8W1W3/H0YHY4/H0YI79/F8VUJ9/B4DPZ9/G8JLD5/F8VR28/F8VYL3/F8VZ52/B4DDQ3/
ENSG00000124374	1	-1.20655	1.20655	0.210305	-0.210304	1.45683	4.96849933778355e-10	ENSG00000124374	poly(A) binding protein interacting protein 2B [Source:HGNC Symbol;Acc:HGNC:29200]	PAIP2B		GO:0006417/GO:0005515/GO:0005737/GO:0000900/GO:0045947	biological_process/molecular_function/cellular_component
ENSG00000182670	1	-1.20633	1.2063	-0.211646	0.211674	0.464068	4.34505504118182e-8	ENSG00000182670	tetratricopeptide repeat domain 3 [Source:HGNC Symbol;Acc:HGNC:12393]	TTC3		/GO:0005634/GO:0046872/GO:0005730/GO:0005829/GO:0016740/GO:0016567/GO:0004842/GO:0006511/GO:0005515/GO:0070936	/cellular_component/molecular_function/biological_process	E9PCE7/E9PMP8/H7C097/A8MT23/E9PMS7//H7C3Z1/H7BZ57/B4DSZ9
ENSG00000154781	1	-1.20596	1.20596	-0.213707	0.213707	0.809051	6.07025994967599e-9	ENSG00000154781	coiled-coil domain containing 174 [Source:HGNC Symbol;Acc:HGNC:28033]	CCDC174		GO:0005634/GO:0005654/GO:0005515	cellular_component/molecular_function	A0A0B4J1R8/A0A087WYA9/
ENSG00000184305	1	-1.20595	1.20595	0.21373	-0.21373	2.68865	1.02660970403459e-7	ENSG00000184305	coiled-coil serine rich protein 1 [Source:HGNC Symbol;Acc:HGNC:29349]	CCSER1				H0YA74/D6RAM6//H0YAI2/E7EUW0/D6RAM2/D6RB70/H0Y9F8
ENSG00000278828	1	-1.20595	1.20595	-0.213763	0.213763	1.58139	1.42403e-05	ENSG00000278828	histone cluster 1 H3 family member h [Source:HGNC Symbol;Acc:HGNC:4775]	HIST1H3H		GO:0005634/GO:0016020/GO:0003677/GO:0046982/GO:0006334/GO:0000786/GO:0005694/GO:0005515/GO:0005576/GO:0005654/GO:0045296/GO:0070062/GO:0044267/GO:0032991/GO:0007596/GO:0038111/GO:0045652/GO:0006335/GO:0000228/GO:0060964/GO:0000183/GO:0045814/GO:0051290/GO:0031492/GO:0000788/GO:0006325/GO:0032200/GO:0060968	cellular_component/molecular_function/biological_process
ENSG00000112379	1	-1.2059	1.2059	-0.214028	0.214028	1.37189	7.07826451500008e-26	ENSG00000112379	ARFGEF family member 3 [Source:HGNC Symbol;Acc:HGNC:21213]	ARFGEF3		GO:0005737/GO:0016020/GO:0016021/GO:0031410/GO:0005086/GO:0032012/GO:0005085/GO:0010923/GO:0030133/GO:0030658	cellular_component/molecular_function/biological_process
ENSG00000144711	1	-1.20578	1.20577	-0.214727	0.214737	1.19942	3.22770089141518e-25	ENSG00000144711	IQ motif and Sec7 domain 1 [Source:HGNC Symbol;Acc:HGNC:29112]	IQSEC1		GO:0005634/GO:0005737/GO:0016020/GO:0043231/GO:0005730/GO:0005515/GO:0005086/GO:0032012/GO:0043547/GO:0008289/GO:0005085/GO:0030036/GO:0051549/GO:1903393/	cellular_component/molecular_function/biological_process/	A0A2R8Y7T6/A0A087WWK8/A0A0C4DGT3/A0A2R8Y695/
ENSG00000142687	1	-1.20567	1.20567	-0.215308	0.215308	0.277352	0.000437172	ENSG00000142687	KIAA0319 like [Source:HGNC Symbol;Acc:HGNC:30071]	KIAA0319L		GO:0016020/GO:0016021/GO:0005794/GO:0005886/GO:0005515/GO:0000139/GO:0031410/	cellular_component/molecular_function/	B4DYG9/H0Y4S8/C9J519//F8WAW2/B1AN15/E7EN73/C9JQ56/C9JVB2
ENSG00000198908	1	-1.20556	1.20556	0.215912	-0.215911	0.813104	1.72967e-06	ENSG00000198908	basic helix-loop-helix family member b9 [Source:HGNC Symbol;Acc:HGNC:29353]	BHLHB9		GO:0005634/GO:0005737/GO:0005829/GO:0005654/GO:0042803/GO:0070062/GO:0050769/GO:0043524/GO:0051965/GO:0061003/GO:0007611	cellular_component/molecular_function/biological_process
ENSG00000076685	1	-1.20547	1.20545	-0.216461	0.216483	0.462537	7.4287e-05	ENSG00000076685	5'-nucleotidase cytosolic II [Source:HGNC Symbol;Acc:HGNC:8022]	NT5C2		GO:0005737/GO:0046872/GO:0000166/GO:0016787/GO:0016311/GO:0005515/GO:0008152/GO:0016310/GO:0008253/GO:0009117/GO:0003824/GO:0005829/GO:0006195/GO:0017144/GO:0046040/GO:0050146/GO:0046085/	cellular_component/molecular_function/biological_process/	S4R3A6/Q5JUV4//Q5JUV6/S4R3E7/Q5JUV3/H0YHR8
ENSG00000101040	1	-1.20546	1.20546	-0.216484	0.216484	0.455596	3.27557172374196e-7	ENSG00000101040	zinc finger MYND-type containing 8 [Source:HGNC Symbol;Acc:HGNC:9397]	ZMYND8		GO:0005634/GO:0046872/GO:0006355/GO:0005515/GO:0035064/GO:0003714/GO:0070577/GO:0030336/GO:0070491/GO:1903758/GO:0047485/GO:0051491/GO:0060999/GO:0098815/GO:1902897/GO:1902952/GO:0005737/GO:0043197/GO:0043198/	cellular_component/molecular_function/biological_process/	Q5TH12/Q5TH08/Q5TH07//A0A087WV57/H7C4X9/A0A087WVZ6/A0A087WYS3
ENSG00000174652	1	-1.20544	1.20544	0.216581	-0.216581	0.624009	9.64509146854897e-7	ENSG00000174652	zinc finger protein 266 [Source:HGNC Symbol;Acc:HGNC:13059]	ZNF266		GO:0003676/GO:0005634/GO:0046872/GO:0006355/GO:0003677/GO:0005622/GO:0005515/GO:0006357/GO:0000981	molecular_function/cellular_component/biological_process	A0A024R7B6/		hsa:10781
ENSG00000138303	1	-1.20542	1.20542	-0.216684	0.216684	0.583009	1.83169981855668e-12	ENSG00000138303	activating signal cointegrator 1 complex subunit 1 [Source:HGNC Symbol;Acc:HGNC:24268]	ASCC1		GO:0003723/GO:0005634/GO:0005515/GO:0005654/GO:0005667/GO:0031594/GO:0006307/GO:0006355/GO:0003676/	molecular_function/cellular_component/biological_process/	E9PJM2/H0YE79/E9PQ44/A0A024QZM0/H0YER2//H0YCB3/E9PQZ6/E9PL92/E9PR40/E9PKM6/H0YE76/E9PM82
ENSG00000122557	1	-1.20536	1.20536	0.217028	-0.217028	0.400261	9.67783e-05	ENSG00000122557	HERPUD family member 2 [Source:HGNC Symbol;Acc:HGNC:21915]	HERPUD2		GO:0016020/GO:0016021/GO:0007283/GO:0006986/	cellular_component/biological_process/	A0A024RA77/C9JDD7/S4R420/C9J4Q7/C9JV48		hsa:64224
ENSG00000197046	1	-1.20536	1.20536	-0.217051	0.21705	1.64863	2.31793e-05	ENSG00000197046	sialic acid binding Ig like lectin 15 [Source:HGNC Symbol;Acc:HGNC:27596]	SIGLEC15		GO:0016020/GO:0016021/GO:0005886/GO:0045087/GO:0032956/GO:0045124/GO:2001204/GO:0032991	cellular_component/biological_process	/K7EN40
ENSG00000138669	1	-1.2052	1.2052	-0.217923	0.217921	1.01628	5.19917e-06	ENSG00000138669	protein kinase cGMP-dependent 2 [Source:HGNC Symbol;Acc:HGNC:9416]	PRKG2		GO:0016020/GO:0000166/GO:0004672/GO:0004674/GO:0005524/GO:0006468/GO:0016740/GO:0016301/GO:0016310/GO:0005886/GO:0004692/GO:0030553/GO:0005829/GO:0016324/GO:0007165/GO:0051186/GO:0042803/GO:0036289/GO:0072659/GO:2001226/GO:0031965	cellular_component/molecular_function/biological_process	A0A140VJM3//B7ZA25	path:hsa04022/path:hsa04713/path:hsa04730/path:hsa04924/path:hsa04740/path:hsa04923/path:hsa04611/path:hsa04970/path:hsa04714/path:hsa04540	hsa:5593	ko:K19477	cGMP-PKG signaling pathway - Homo sapiens (human)/Circadian entrainment - Homo sapiens (human)/Long-term depression - Homo sapiens (human)/Renin secretion - Homo sapiens (human)/Olfactory transduction - Homo sapiens (human)/Regulation of lipolysis in adipocytes - Homo sapiens (human)/Platelet activation - Homo sapiens (human)/Salivary secretion - Homo sapiens (human)/Thermogenesis - Homo sapiens …
ENSG00000163435	1	-1.205	1.205	0.219013	-0.219013	0.901203	0.000188123	ENSG00000163435	E74 like ETS transcription factor 3 [Source:HGNC Symbol;Acc:HGNC:3318]	ELF3		GO:0005634/GO:0005737/GO:0005794/GO:0005829/GO:0005654/GO:0006355/GO:0003677/GO:0003700/GO:0006366/GO:0043565/GO:0005515/GO:0006954/GO:0007275/GO:0030154/GO:0000978/GO:0001077/GO:0001824/GO:0009653/GO:0030198/GO:0030855/GO:0045944/GO:0060056/GO:0003713/GO:0045893/GO:0000981/GO:0006357/GO:0045892/GO:0008544/GO:0045747	cellular_component/biological_process/molecular_function	Q5SR36/A0A024R974		hsa:1999	ko:K09429
ENSG00000196387	1	-1.20499	1.20499	0.219098	-0.219098	0.964969	9.36597060439352e-12	ENSG00000196387	zinc finger protein 140 [Source:HGNC Symbol;Acc:HGNC:12925]	ZNF140		GO:0003676/GO:0005634/GO:0046872/GO:0006355/GO:0003677/GO:0005622/GO:0000981/GO:0000122/GO:0043565/GO:0003700/GO:0001227/	molecular_function/cellular_component/biological_process/	I3L0I7/F5H3Z2/F5GX08/F8WAF8//F5H644/I3L0D9/F5H4I1
ENSG00000275023	1	-1.20498	1.20498	-0.219159	0.219159	0.388157	3.64854e-06	ENSG00000275023	MLLT6 PHD finger containing [Source:HGNC Symbol;Acc:HGNC:7138]	MLLT6		GO:0046872/GO:0005515/GO:0005634/GO:0003014/GO:0007588/GO:0010765/GO:0035811/GO:0035812/GO:0036359/GO:0045944/GO:2001161/GO:0042393/GO:0006355/GO:0031491/	molecular_function/cellular_component/biological_process/	A0A087WW39/A0A087WVY1/Q6P2C6
ENSG00000134198	1	-1.20484	1.20484	0.219913	-0.219913	1.47646	1.61065026438937e-60	ENSG00000134198	tetraspanin 2 [Source:HGNC Symbol;Acc:HGNC:20659]	TSPAN2		GO:0016020/GO:0016021/GO:0005515/GO:0007166/GO:0005887/GO:0006954/GO:0007420/GO:0014002/GO:0014005/GO:0042552/GO:0048709/GO:0061564/GO:0005886/GO:0043209	cellular_component/molecular_function/biological_process	B1AKP1//B1AKP2
ENSG00000075089	1	-1.20483	1.20483	0.219965	-0.219965	0.645186	2.70601176288365e-7	ENSG00000075089	ARP6 actin related protein 6 homolog [Source:HGNC Symbol;Acc:HGNC:24025]	ACTR6		GO:0005634/GO:0006338/GO:0005737/GO:0005856/GO:0005515	cellular_component/biological_process/molecular_function	/F8VSD1/G3V1Y1/F8W043/F8VRL1/F8VP72/F8W057/F8W0Q1
ENSG00000276168	1	-1.2048	1.2048	-0.220121	0.220121	4.3646	9.08675e-05
ENSG00000177463	1	-1.20476	1.20476	-0.220338	0.220338	0.7217	1.11380744721716e-17	ENSG00000177463	nuclear receptor subfamily 2 group C member 2 [Source:HGNC Symbol;Acc:HGNC:7972]	NR2C2		/GO:0005634/GO:0008270/GO:0046872/GO:0005654/GO:0006355/GO:0003677/GO:0003700/GO:0043565/GO:0003707/GO:0043401/GO:0030154/GO:0007283/GO:0005515/GO:0000981/GO:0000978/GO:0045944/GO:0001228/GO:0007399/GO:0003713/GO:0038023/GO:0046982/GO:0006367/GO:0001077/GO:0000977/GO:0006351	/cellular_component/molecular_function/biological_process	H7C3L1//F2YGU2/H7C3R1/C9J2Y1/C9JKS0/C9JMI6
ENSG00000169919	1	-1.20467	1.20467	-0.220851	0.220851	0.625628	5.97832302305635e-9	ENSG00000169919	glucuronidase beta [Source:HGNC Symbol;Acc:HGNC:4696]	GUSB	00600+3.2.1.23/00531+3.2.1.23/00604+3.2.1.23/00511+3.2.1.23/00052+3.2.1.23/	GO:0016020/GO:0043231/GO:0016787/GO:0005975/GO:0004553/GO:0016798/GO:0008152/GO:0005615/GO:0019904/GO:0005764/GO:0005576/GO:0070062/GO:0005102/GO:0043312/GO:0030246/GO:1904813/GO:0043202/GO:0006027/GO:0035578/GO:0030214/GO:0004566/GO:0019391/	cellular_component/molecular_function/biological_process/	/F2Z3L6/F8WBK6
ENSG00000152767	1	-1.20464	1.20464	-0.220982	0.220982	0.486313	0.000105737	ENSG00000152767	FERM ARH/RhoGEF and pleckstrin domain protein 1 [Source:HGNC Symbol;Acc:HGNC:3591]	FARP1		GO:0005089/GO:0035023/GO:0005856/GO:0008092/GO:0005737/GO:0016020/GO:0005829/GO:0005886/GO:0042995/GO:0007275/GO:0030054/GO:0045202/GO:0005085/GO:0030425/GO:0031234/GO:0030175/GO:0043197/GO:0010923/GO:0043005/GO:0007416/GO:0048813/GO:0030676/GO:0048365/GO:0098942/GO:0098974/GO:1905606/GO:0098890/GO:0098978	molecular_function/biological_process/cellular_component	H0Y783/M0QXT1/A0A1B0GV68/C9JME2/M0QYB0//M0R262
ENSG00000124496	1	-1.20452	1.20455	-0.221594	0.221566	0.442539	6.0836310258722e-8	ENSG00000124496	transcriptional regulating factor 1 [Source:HGNC Symbol;Acc:HGNC:18273]	TRERF1		GO:0003676/GO:0005634/GO:0046872/GO:0005730/GO:0005829/GO:0005654/GO:0003677/GO:0003700/GO:0006694/GO:0007275/GO:0030374/GO:0045893/GO:0006357/GO:0000981/GO:0008134/GO:0005667/GO:0044212/GO:0042592/GO:0003712/GO:0046885/GO:0008301/GO:0000118/GO:0006707	molecular_function/cellular_component/biological_process	Q05GC8/		hsa:55809
ENSG00000084234	1	-1.2045	1.20454	-0.221665	0.221627	0.315143	0.000362195	ENSG00000084234	amyloid beta precursor like protein 2 [Source:HGNC Symbol;Acc:HGNC:598]	APLP2		/GO:0016021/GO:0008201/GO:0046914/GO:0005634/GO:0016020/GO:0003677/GO:0004867/GO:0010951/GO:0005886/GO:0005515/GO:0007186/GO:0030414/GO:0010466/GO:0042802/GO:0070062/GO:0044267/GO:0043687/GO:0002576/GO:0005788/GO:0031092	/cellular_component/molecular_function/biological_process	Q9UED0/A0A140VJE9//E9PPD0/E9PQS3/E9PSC7/E9PK76
ENSG00000281903	1	-1.20429	1.20429	-0.222925	0.222925	1.13351	2.93542e-05
ENSG00000139173	1	-1.20427	1.20427	0.223012	-0.223012	0.860925	4.27667651914791e-8	ENSG00000139173	transmembrane protein 117 [Source:HGNC Symbol;Acc:HGNC:25308]	TMEM117		GO:0016020/GO:0016021/GO:0005886/GO:0003674/GO:0005783/GO:0070059	cellular_component/molecular_function/biological_process	F8W1J2//F8VS00/H0YI63
ENSG00000065243	1	-1.20418	1.20415	0.223597	-0.22357	0.607927	1.85870663661442e-10	ENSG00000065243	protein kinase N2 [Source:HGNC Symbol;Acc:HGNC:9406]	PKN2	04070+2.7.11.13/	GO:0016020/GO:0016021/GO:0005813/GO:0004674/GO:0006468/GO:0005654/GO:0016301/GO:0016310/GO:0007165/GO:0045111/GO:0017049/GO:0003723/GO:0005634/GO:0005737/GO:0000166/GO:0004672/GO:0005524/GO:0005829/GO:0016740/GO:0007155/GO:0005886/GO:0051301/GO:0005856/GO:0042995/GO:0005515/GO:0007049/GO:0016604/GO:0006915/GO:0004697/GO:0030054/GO:0048471/GO:0030496/GO:0035556/GO:0018105/GO:0045296/GO:0030027/GO:…	cellular_component/molecular_function/biological_process	B1AL79/H0Y5V5/H0Y429/
ENSG00000263155	1	-1.20415	1.20415	0.223649	-0.223649	0.785057	3.89591995930202e-8	ENSG00000263155	myocardial zonula adherens protein [Source:HGNC Symbol;Acc:HGNC:43444]	MYZAP		GO:0005622/GO:0005737/GO:0016020/GO:0035556/GO:0005886/GO:0005856/GO:0005515/GO:0030054/GO:0031234/GO:0031674/GO:0030864/GO:0030018	cellular_component/biological_process/molecular_function	H3BTD5//H0YCD3/A0A024R5W4		hsa:100820829	ko:K22031
ENSG00000225526	1	-1.20414	1.20415	0.223681	-0.223682	0.969873	2.53539e-06	ENSG00000225526	MKRN2 opposite strand [Source:HGNC Symbol;Acc:HGNC:40375]	MKRN2OS				/H3BSJ0
ENSG00000087502	1	-1.20411	1.20411	-0.223866	0.223866	0.638591	4.43746394415564e-8	ENSG00000087502	ERGIC and golgi 2 [Source:HGNC Symbol;Acc:HGNC:30208]	ERGIC2		GO:0005634/GO:0005737/GO:0016020/GO:0016021/GO:0043231/GO:0005730/GO:0005783/GO:0005789/GO:0005794/GO:0016192/GO:0006888/GO:0030134/GO:0005515/GO:0030176/GO:0030173/GO:0006890/GO:0033116/	cellular_component/biological_process/molecular_function/	H0YI50/A0A087WU02/F8VRW9/F8VR88/F8VPA6/H0YI58/F8W0R1/H0YHS0/F8VUZ2/A0A024RB08/H0YHJ8		hsa:51290	ko:K20366
ENSG00000271894	1	-1.20406	1.20406	-0.224164	0.224164	2.10064	0.000214032
ENSG00000143036	1	-1.204	1.20402	0.224387	-0.224404	0.718931	2.65051529542627e-10	ENSG00000143036	solute carrier family 44 member 3 [Source:HGNC Symbol;Acc:HGNC:28689]	SLC44A3		GO:0016020/GO:0016021/GO:0005515/GO:0005886/GO:0055085/GO:0006656/GO:0015871/GO:0015220/	cellular_component/molecular_function/biological_process/	F8W7F3/H0YDW5/H0YD35//E9PIC5
ENSG00000136319	1	-1.20398	1.20398	-0.224558	0.224558	0.384823	0.000403406	ENSG00000136319	tetratricopeptide repeat domain 5 [Source:HGNC Symbol;Acc:HGNC:19274]	TTC5		GO:0005634/GO:0005737/GO:0005654/GO:0005515/GO:0006281/GO:0006974/GO:1901796/GO:0003677/GO:0003682/GO:0045944/	cellular_component/molecular_function/biological_process/	H9KV81//G3V3I6
ENSG00000138193	1	-1.20374	1.20374	-0.22584	0.22584	0.631959	0.000635241	ENSG00000138193	phospholipase C epsilon 1 [Source:HGNC Symbol;Acc:HGNC:17175]	PLCE1	00562+3.1.4.11/04070+3.1.4.11	GO:0005737/GO:0016020/GO:0046872/GO:0005829/GO:0016787/GO:0035556/GO:0007165/GO:0005794/GO:0006629/GO:0016042/GO:0007264/GO:0005886/GO:0005085/GO:0000139/GO:0008081/GO:0004435/GO:0005515/GO:0007265/GO:0007507/GO:0008283/GO:0007010/GO:0001558/GO:0019899/GO:0007173/GO:0007204/GO:0043647/GO:0045859/GO:0019722/GO:0000187/GO:0006940/GO:0008277/GO:0007200/GO:0006651/GO:0046578/GO:0017016/GO:0048016/GO:…	cellular_component/molecular_function/biological_process
ENSG00000120805	1	-1.20365	1.20365	-0.226325	0.226325	0.487325	3.26326e-05	ENSG00000120805	ADP ribosylation factor like GTPase 1 [Source:HGNC Symbol;Acc:HGNC:692]	ARL1		GO:0005737/GO:0016020/GO:0005794/GO:0046872/GO:0000166/GO:0005525/GO:0005622/GO:0000139/GO:0003924/GO:0006886/GO:0005829/GO:0005802/GO:0016192/GO:0042147/GO:0019904/GO:0032588/GO:0007030/GO:0008047/GO:0034067/GO:0031584/GO:0009404/GO:0048193	cellular_component/molecular_function/biological_process	F8VP99/F8W1Z8/F8VP63/F8VYN9//B4DZG7
ENSG00000185885	1	-1.2035	1.2035	0.227128	-0.227128	1.29232	0.000397553	ENSG00000185885	interferon induced transmembrane protein 1 [Source:HGNC Symbol;Acc:HGNC:5412]	IFITM1		GO:0016020/GO:0016021/GO:0005886/GO:0002376/GO:0045087/GO:0050776/GO:0051607/GO:0005515/GO:0008285/GO:0009615/GO:0045071/GO:0001503/GO:0007166/GO:0046597/GO:0060337/GO:0035456/GO:0030336/GO:0034341/GO:0045669/GO:0035455	cellular_component/biological_process/molecular_function
ENSG00000206573	1	-1.20347	1.20347	-0.227298	0.227298	1.09859	5.39712e-05
ENSG00000162039	1	-1.20342	1.20342	-0.227545	0.227543	0.676277	0.00033701	ENSG00000162039	meiosis specific with OB domains [Source:HGNC Symbol;Acc:HGNC:28569]	MEIOB		/GO:0005634/GO:0005737/GO:0016787/GO:0003677/GO:0005694/GO:0090305/GO:0004527/GO:0004518/GO:0051321/GO:0000724/GO:0000712/GO:0003682/GO:0008310/GO:0007129/GO:0003697/GO:0009566/GO:0007140/GO:0007141/GO:0007144	/cellular_component/molecular_function/biological_process	/H3BSU6/H3BU18/H3BU10
ENSG00000070950	1	-1.2033	1.2033	-0.228172	0.228172	1.14943	2.85431670413147e-8	ENSG00000070950	RAD18 E3 ubiquitin protein ligase [Source:HGNC Symbol;Acc:HGNC:18278]	RAD18		/GO:0005634/GO:0005737/GO:0046872/GO:0005654/GO:0016740/GO:0016567/GO:0003677/GO:0006281/GO:0005856/GO:0005515/GO:0006974/GO:0016604/GO:0005813/GO:0005815/GO:0061630/GO:0044877/GO:0035861/GO:0031625/GO:0006513/GO:0006301/GO:0000403/GO:0042802/GO:0005657/GO:0003684/GO:0060548/GO:0042405/GO:0042769/GO:0009411/GO:0031593/GO:0051984/GO:0043142/GO:0051865/GO:0097505	/cellular_component/molecular_function/biological_process	F8WFA6/C9J0Q4/H7C0A5/F8WE49//F8WAZ7/H7C3I2
ENSG00000165949	1	-1.20326	1.20327	-0.228385	0.228377	1.59122	0.000595516	ENSG00000165949	interferon alpha inducible protein 27 [Source:HGNC Symbol;Acc:HGNC:5397]	IFI27		GO:0016020/GO:0016021/	cellular_component/	A0A087WZR1/A0A087X174/A0A087WUJ8/A0A087X035/A8K0H0/A0A087WV79/G3V4U3/Q9H4B1/A0A087WZF8
ENSG00000239883	1	-1.20324	1.20324	-0.228499	0.228499	0.814168	0.000848412
ENSG00000167600	1	-1.20324	1.20325	-0.228481	0.228464	0.754108	1.00325439960461e-7	ENSG00000167600	cytochrome P450 family 2 subfamily S member 1 [Source:HGNC Symbol;Acc:HGNC:15654]	CYP2S1	00982+1.14.14.1/00380+1.14.14.1/00590+1.14.14.1/00071+1.14.14.1/00830+1.14.14.1/00627+1.14.14.1/00232+1.14.14.1/00591+1.14.14.1/00140+1.14.14.1/00980+1.14.14.1/	GO:0016020/GO:0046872/GO:0005783/GO:0004497/GO:0016491/GO:0055114/GO:0005789/GO:0031090/GO:0043231/GO:0005506/GO:0016705/GO:0005515/GO:0020037/GO:0016712/GO:0005737/GO:0008392/GO:0008395/GO:0006082/GO:0006805/GO:0019373/GO:0042738/GO:0070330/GO:0008401/GO:0016021/	cellular_component/molecular_function/biological_process/	M0QYI2/M0R152//M0QY51/M0R2G8/M0R057
ENSG00000108465	1	-1.20318	1.20318	0.228834	-0.228834	0.343226	2.19623e-05	ENSG00000108465	CDK5 regulatory subunit associated protein 3 [Source:HGNC Symbol;Acc:HGNC:18673]	CDK5RAP3		/GO:0005634/GO:0005737/GO:0016020/GO:0005730/GO:0005829/GO:0005856/GO:0005515/GO:0005874/GO:0005813/GO:0005815/GO:0019901/GO:0008283/GO:0032088/GO:0031398/GO:0032991/GO:0001933/GO:0007095/GO:0007420/GO:0051019/GO:0030332/GO:0051059/GO:0043407/GO:0071901/GO:0071569/GO:0000079/GO:0030968/GO:0010921/GO:1900182/GO:0044387/GO:0097371/GO:0045664/GO:0030262/GO:1903363/GO:1901798/GO:0044389/GO:0044818/GO…	/cellular_component/molecular_function/biological_process	J3QQS7//J3KSD0/J3KRK4/J3QS62/J3QL95/J3QRM1/J3KTA5/J3QL86/J3KS63/J3QRX0/J3QQY1/J3KRI2
ENSG00000157837	1	-1.20314	1.20314	-0.229033	0.229033	0.458932	9.22313474886004e-8	ENSG00000157837	signal peptide peptidase like 3 [Source:HGNC Symbol;Acc:HGNC:30424]	SPPL3		GO:0016020/GO:0016021/GO:0043231/GO:0005783/GO:0005789/GO:0016787/GO:0005794/GO:0005886/GO:0042803/GO:0008233/GO:0006508/GO:0004190/GO:0005515/GO:0030660/GO:0032092/GO:0050852/GO:0007204/GO:0033116/GO:0005791/GO:0070886/GO:0033619/GO:0042500/GO:0006465/GO:0035307/GO:0071458/GO:0071556	cellular_component/molecular_function/biological_process	F5H4L1//F5H4Y6/F5H6I1/F5H2A2/F5H7J2
ENSG00000167080	1	-1.2031	1.20309	-0.229274	0.229281	1.92309	1.70966246462997e-26	ENSG00000167080	beta-1 4-N-acetyl-galactosaminyltransferase 2 [Source:HGNC Symbol;Acc:HGNC:24136]	B4GALNT2		GO:0016020/GO:0016021/GO:0016740/GO:0016757/GO:0005794/GO:0016758/GO:0000139/GO:0006486/GO:0030173/GO:0022408/GO:0018279/GO:0030259/GO:0008376/GO:0019276/GO:0006047	cellular_component/molecular_function/biological_process
ENSG00000162782	1	-1.20276	1.20276	-0.231001	0.231001	1.22197	2.4597e-05	ENSG00000162782	tudor domain containing 5 [Source:HGNC Symbol;Acc:HGNC:20614]	TDRD5		GO:0005737/GO:0007275/GO:0030154/GO:0007281/GO:0007283/GO:0007286/GO:0033391/GO:0043046/GO:0030719/GO:0071546/	cellular_component/biological_process/	A0A024R910//A0A0C4DG74		hsa:163589	ko:K18407
ENSG00000078487	1	-1.20273	1.20273	0.231171	-0.231171	0.889317	0.000244045	ENSG00000078487	zinc finger CW-type and PWWP domain containing 1 [Source:HGNC Symbol;Acc:HGNC:23486]	ZCWPW1		GO:0008270/GO:0046872/	molecular_function/	C9JUV7//H7C4V9/A0A0S2Z5N7
ENSG00000136153	1	-1.20263	1.20263	0.231715	-0.231715	0.767477	1.64394156725614e-9	ENSG00000136153	LIM domain 7 [Source:HGNC Symbol;Acc:HGNC:6646]	LMO7		GO:0005634/GO:0005737/GO:0046872/GO:0016567/GO:0003700/GO:0004842/GO:0023051/GO:0009986/GO:0005925/GO:0030155/GO:0045944/GO:0005829/GO:0043687/GO:0016324/GO:0000151/GO:0005635/GO:0000209//GO:0016020/GO:0016021/GO:0008022/GO:0042805/GO:0098609/GO:0005654/GO:0005886/GO:0005913	cellular_component/molecular_function/biological_process/	E9PMJ6/E9PRJ0/E9PK58/E9PRE3/H0YDG6/H0Y424/E9PLU6/F8WD26/E9PJ10/H0YDQ3//E9PMP7/H0YE95/A0A0A0MTE2/E9PMT2/E9PMS6/J3KP06/U3KQE6	path:hsa04520	hsa:4008	ko:K06084	Adherens junction - Homo sapiens (human)
ENSG00000120837	1	-1.20247	1.20247	-0.232527	0.232527	0.45215	0.00077129	ENSG00000120837	nuclear transcription factor Y subunit beta [Source:HGNC Symbol;Acc:HGNC:7805]	NFYB		GO:0005634/GO:0006355/GO:0003677/GO:0046982/GO:0043565/GO:0005515/GO:0003700/GO:0044212/GO:0044877/GO:0045893/GO:1990830/GO:0016602/GO:0006357/GO:0000981/GO:0005654/GO:0070491/GO:0090575/GO:0045540/GO:0000980/GO:0032993	cellular_component/biological_process/molecular_function	A0A024RBG7/F8VSL3	path:hsa04612/path:hsa05166/path:hsa05152	hsa:4801	ko:K08065	Antigen processing and presentation - Homo sapiens (human)/Human T-cell leukemia virus 1 infection - Homo sapiens (human)/Tuberculosis - Homo sapiens (human)
ENSG00000125037	1	-1.20244	1.20244	-0.232695	0.232695	1.57049	2.84390507000611e-85	ENSG00000125037	ER membrane protein complex subunit 3 [Source:HGNC Symbol;Acc:HGNC:23999]	EMC3		GO:0016020/GO:0016021/GO:0003674/GO:0008150/GO:0072546/GO:0034975	cellular_component/molecular_function/biological_process	/C9JLM9/S4R3U9
ENSG00000162631	1	-1.20224	1.20225	-0.233683	0.233682	3.03276	1.47314e-06	ENSG00000162631	netrin G1 [Source:HGNC Symbol;Acc:HGNC:23319]	NTNG1		GO:0016020/GO:0005886/GO:0005515/GO:0007275/GO:0030154/GO:0005576/GO:0031225/GO:0007399/GO:0007409/GO:0046658/GO:0050839/GO:0098632/GO:0099560	cellular_component/molecular_function/biological_process	X5DNW2/
ENSG00000145476	1	-1.20222	1.20222	-0.233829	0.233829	1.48717	2.15181e-05	ENSG00000145476	cytochrome P450 family 4 subfamily V member 2 [Source:HGNC Symbol;Acc:HGNC:23198]	CYP4V2		GO:0016020/GO:0016021/GO:0046872/GO:0004497/GO:0016491/GO:0055114/GO:0005783/GO:0005789/GO:0006629/GO:0005506/GO:0016705/GO:0020037/GO:0050896/GO:0007601/GO:0001523/GO:0016125/GO:0010430	cellular_component/molecular_function/biological_process
ENSG00000144554	1	-1.20222	1.20222	-0.233829	0.233829	1.29149	1.51075983960379e-29	ENSG00000144554	FA complementation group D2 [Source:HGNC Symbol;Acc:HGNC:3585]	FANCD2		GO:0005634/GO:0005730/GO:0005829/GO:0006281/GO:0005515/GO:0006974/GO:0007049/GO:0016604/GO:0005654/GO:0036297/GO:0070182/GO:0010332/GO:0000793/GO:0007129/GO:0007276/GO:0034599/GO:0045589/GO:0048854/GO:0050727/GO:0051090/GO:0097150/GO:2000348/	cellular_component/biological_process/molecular_function/	/F8WE37/A0A024R2G2/H7BZJ7
ENSG00000166575	1	-1.20189	1.20189	-0.235485	0.235485	0.903121	5.34496e-05	ENSG00000166575	transmembrane protein 135 [Source:HGNC Symbol;Acc:HGNC:26167]	TMEM135		GO:0016020/GO:0016021/GO:0005739/GO:0005777/GO:0005778/GO:0031966/GO:0007031/GO:0009409/GO:0032094/GO:0090140/GO:0005811	cellular_component/biological_process	E9PJX0//E9PIS2/E9PQL0
ENSG00000268279	1	-1.2018	1.2018	0.235967	-0.235967	1.39306	3.25906e-05	ENSG00000268279	novel transcript	AC090004.1		GO:0016020/GO:0016021	cellular_component	V9GY05
ENSG00000197712	1	-1.20147	1.20147	-0.237659	0.237659	0.342384	1.00767e-05	ENSG00000197712	family with sequence similarity 114 member A1 [Source:HGNC Symbol;Acc:HGNC:25087]	FAM114A1		GO:0005794/GO:0005634/GO:0005829/GO:0005737/GO:0005654/GO:0005515	cellular_component/molecular_function	/D6R9C9/A0A024R9V7
ENSG00000276612	1	-1.20144	1.20144	-0.237797	0.237797	19.8294	2.64466e-05	ENSG00000276612	novel protein	FP565260.2		GO:0005739	cellular_component	A0A096LPI6
ENSG00000154639	1	-1.20111	1.20111	-0.239447	0.239447	0.599778	1.23732e-06	ENSG00000154639	CXADR Ig-like cell adhesion molecule [Source:HGNC Symbol;Acc:HGNC:2559]	CXADR		GO:0016020/GO:0016021/GO:0005654/GO:0007155/GO:0005886/GO:0030054/GO:0005576/GO:0045121/GO:0046718/GO:0045216/GO:0050776/GO:0050900/GO:0005887/GO:0005923/GO:0005515/GO:0030593/GO:0030175/GO:0030426/GO:0007507/GO:0001669/GO:0016323/GO:0032991/GO:0005912/GO:0016032/GO:0005913/GO:0043005/GO:0005178/GO:0005911/GO:0016327/GO:0044297/GO:0008013/GO:0030165/GO:0005737/GO:0001618/GO:0007005/GO:0031532/GO:…	cellular_component/biological_process/molecular_function
ENSG00000099290	1	-1.20095	1.20095	-0.24026	0.24026	0.666202	2.05545e-06	ENSG00000099290	WASH complex subunit 2A [Source:HGNC Symbol;Acc:HGNC:23416]	WASHC2A		GO:0016020/GO:0015031/GO:0043231/GO:0005730/GO:0005829/GO:0005886/GO:0008289/GO:0071203/GO:0005515/GO:0005768/GO:0005769/GO:0031901/GO:0042147	cellular_component/biological_process/molecular_function	E7ESD2/A0A087WYF6/Q5T1D7/F8W7U3//B1AP61
ENSG00000156502	1	-1.20083	1.20083	-0.24085	0.24085	0.921934	6.1255877136692e-11	ENSG00000156502	Suv3 like RNA helicase [Source:HGNC Symbol;Acc:HGNC:11471]	SUPV3L1		GO:0003723/GO:0005634/GO:0000166/GO:0005524/GO:0016787/GO:0005739/GO:0004386/GO:0003677/GO:0042803/GO:0005515/GO:0006310/GO:0005759/GO:0016817/GO:0006401/GO:0043066/GO:0042645/GO:0030307/GO:0004004/GO:0003725/GO:0032508/GO:0003678/GO:0070584/GO:0000958/GO:0034458/GO:0000962/GO:0000965/GO:0035945/GO:0035946/GO:0070827/GO:2000827/GO:0045025/	molecular_function/cellular_component/biological_process/	/B1AR60
ENSG00000075975	1	-1.2008	1.20081	-0.240984	0.240975	1.29014	2.9385083007769e-25	ENSG00000075975	makorin ring finger protein 2 [Source:HGNC Symbol;Acc:HGNC:7113]	MKRN2		GO:0003723/GO:0046872/GO:0016740/GO:0016567/GO:0005515/GO:0008150/GO:0005622	molecular_function/biological_process/cellular_component	/C9J494
ENSG00000138286	1	-1.20035	1.20035	0.243221	-0.243221	0.891045	6.12988152978521e-25	ENSG00000138286	family with sequence similarity 149 member B1 [Source:HGNC Symbol;Acc:HGNC:29162]	FAM149B1				H7BY93/H0Y607//V9GYM5
ENSG00000188234	1	-1.20016	1.20016	-0.244156	0.244156	0.816916	7.8606e-05	ENSG00000188234	ArfGAP with GTPase domain ankyrin repeat and PH domain 4 [Source:HGNC Symbol;Acc:HGNC:23459]	AGAP4		GO:0046872/GO:0005096/GO:0043547/GO:0005634/	molecular_function/biological_process/cellular_component/	A0A087X0Z1/A0A087WTP8//K7ER91/A0A087WSV4
ENSG00000112303	1	-1.19998	1.19998	0.24505	-0.24505	3.32421	2.08774e-05	ENSG00000112303	vanin 2 [Source:HGNC Symbol;Acc:HGNC:12706]	VNN2		GO:0006807/GO:0016020/GO:0016787/GO:0005886/GO:0016811/GO:0005576/GO:0031225/GO:0017159/GO:0015939	biological_process/cellular_component/molecular_function	J3QT03/E9PK31/E9PLK5/J3KQQ7//E9PL76/B4DQB2/E9PRD9/E9PQ75/J3KQ55
ENSG00000134283	1	-1.19993	1.19993	-0.245294	0.245294	0.475444	4.83631e-06	ENSG00000134283	periphilin 1 [Source:HGNC Symbol;Acc:HGNC:19369]	PPHLN1		GO:0005829/GO:0005654/GO:0045892/GO:0003723/GO:0005634/GO:0005737/GO:0005794/GO:0005694/GO:0005515/GO:0031424/	cellular_component/biological_process/molecular_function/	F8W0Q9/B7Z8L1/F8VWU8/F8WF16//F8W6A0/F8VP48/F8VXV7/F8VPY7/F8VRK2
ENSG00000131373	1	-1.19977	1.19976	-0.246078	0.246088	1.25763	2.29390474431855e-38	ENSG00000131373	2-hydroxyacyl-CoA lyase 1 [Source:HGNC Symbol;Acc:HGNC:17856]	HACL1		GO:0046872/GO:0000287/GO:0003824/GO:0016829/GO:0006631/GO:0005515/GO:0048037/GO:0005777/GO:0042802/GO:0030976/GO:0005829/GO:0005102/GO:0006625/GO:0005782/GO:0051259/GO:0001561/GO:0016830	molecular_function/biological_process/cellular_component	B3KPX4/Q7Z773/F8WCH9/C9J306/C9JJM7/
ENSG00000198807	1	-1.19972	1.19972	0.246317	-0.246316	0.755765	2.08723866150044e-10	ENSG00000198807	paired box 9 [Source:HGNC Symbol;Acc:HGNC:8623]	PAX9		GO:0005634/GO:0006355/GO:0006366/GO:0003677/GO:0003700/GO:0007275/GO:0009887/GO:0005515/GO:0000981/GO:0045892/GO:0000977/GO:0001228/GO:0007492/GO:0042476/GO:0042481/GO:0045944/GO:0060325/GO:0071363	cellular_component/biological_process/molecular_function	G3V233/
ENSG00000234420	1	-1.19967	1.19967	-0.246564	0.246564	1.00349	1.7812e-05
ENSG00000043039	1	-1.19956	1.19956	-0.247104	0.247104	2.62474	4.42088727469456e-46	ENSG00000043039	BARX homeobox 2 [Source:HGNC Symbol;Acc:HGNC:956]	BARX2		GO:0005634/GO:0005829/GO:0005654/GO:0006355/GO:0006366/GO:0003677/GO:0043565/GO:0000977/GO:0001228/GO:0006357/GO:0000981/GO:0045944/GO:0009888/GO:0048513/GO:0003682/GO:0003700/GO:0000122/GO:0001502/GO:0014902/GO:0005667	cellular_component/biological_process/molecular_function
ENSG00000160588	1	-1.19935	1.19935	0.248115	-0.248115	0.355204	0.000879337	ENSG00000160588	myelin protein zero like 3 [Source:HGNC Symbol;Acc:HGNC:27279]	MPZL3		GO:0016020/GO:0016021/GO:0007155/GO:0005515/GO:0030198/GO:0042633	cellular_component/biological_process/molecular_function	/E9PPB1
ENSG00000166598	1	-1.19932	1.1993	-0.248286	0.248304	0.6744	1.40576528789793e-7	ENSG00000166598	heat shock protein 90 beta family member 1 [Source:HGNC Symbol;Acc:HGNC:12028]	HSP90B1		GO:0005524/GO:0006457/GO:0051082/GO:0003723/GO:0005634/GO:0016020/GO:0015031/GO:0000166/GO:0005783/GO:0005789/GO:0005829/GO:0005515/GO:0042470/GO:0048471/GO:0005509/GO:0005925/GO:0030496/GO:0006898/GO:0005576/GO:0030970/GO:0070062/GO:0044267/GO:0031012/GO:0043687/GO:0032991/GO:0001666/GO:0030433/GO:0043066/GO:0002224/GO:0005788/GO:0019221/GO:0034976/GO:0036500/GO:0050750/GO:0071682/GO:0034975/GO:…	molecular_function/biological_process/cellular_component/	V9HWP2/H0YIV0/Q96GW1/F8VPC7/F8W026/A0A1W2PRR1	path:hsa04657/path:hsa04151/path:hsa05132/path:hsa04918/path:hsa04915/path:hsa05200/path:hsa05215/path:hsa04141/path:hsa05418	hsa:7184	ko:K09487	IL-17 signaling pathway - Homo sapiens (human)/PI3K-Akt signaling pathway - Homo sapiens (human)/Salmonella infection - Homo sapiens (human)/Thyroid hormone synthesis - Homo sapiens (human)/Estrogen signaling pathway - Homo sapiens (human)/Pathways in cancer - Homo sapiens (human)/Prostate cancer - Homo sapiens (human)/Protein processing in endoplasmic reticulum - Homo sapiens (human)/Fluid shear…
ENSG00000156508	1	-1.19928	1.19928	-0.248469	0.248469	0.743427	5.14874822556354e-31	ENSG00000156508	eukaryotic translation elongation factor 1 alpha 1 [Source:HGNC Symbol;Acc:HGNC:3189]	EEF1A1		GO:0003723/GO:0005634/GO:0005737/GO:0016020/GO:0006412/GO:0000166/GO:0003924/GO:0005525/GO:0005829/GO:0005886/GO:0005515/GO:0005615/GO:0003746/GO:0006414/GO:0000049/GO:0005730/GO:0005576/GO:0070062/GO:0019901/GO:0032587/GO:0043312/GO:0034774/GO:1904813/GO:0030864/GO:0071364/GO:1904714/GO:0005853/GO:0098574	molecular_function/cellular_component/biological_process	A0A087WVQ9/Q5JR01//A0A087WV01/A6PW80
ENSG00000165675	1	-1.19884	1.19888	-0.250495	0.250457	0.437366	1.14012e-06	ENSG00000165675	ecto-NOX disulfide-thiol exchanger 2 [Source:HGNC Symbol;Acc:HGNC:2259]	ENOX2		GO:0003676/GO:0016020/GO:0016491/GO:0055114/GO:0005886/GO:0005576/GO:0048511/GO:0005615/GO:0007624/GO:0009897/GO:0040008/GO:0005829/GO:0015035/GO:0003723	molecular_function/cellular_component/biological_process	B1AKF7/A0A0C4DGT9/
ENSG00000135241	1	-1.19879	1.19879	0.250789	-0.250789	0.665467	2.75780725649139e-7	ENSG00000135241	patatin like phospholipase domain containing 8 [Source:HGNC Symbol;Acc:HGNC:28900]	PNPLA8		GO:0005737/GO:0016020/GO:0016021/GO:0005524/GO:0005783/GO:0005789/GO:0016787/GO:0005794/GO:0006629/GO:0016042/GO:0006631/GO:0000139/GO:0048471/GO:0005777/GO:0005778/GO:0005622/GO:0008219/GO:0001516/GO:0019369/GO:0004623/GO:0036151/GO:0036152/GO:0043651/GO:0004622/GO:0034638/GO:0047499/GO:0046338/GO:0050482/	cellular_component/molecular_function/biological_process/	A0A024R746//C9JAX4/C9J9W9/A0A0C4DG51		hsa:50640	ko:K16815
ENSG00000104763	1	-1.1986	1.19862	-0.25166	0.251637	0.578035	1.32230701898769e-7	ENSG00000104763	N-acylsphingosine amidohydrolase 1 [Source:HGNC Symbol;Acc:HGNC:735]	ASAH1		GO:0016787/GO:0006629/GO:0005764/GO:0005615/GO:0005576/GO:0070062/GO:0043312/GO:1904813/GO:1904724/GO:0043202/GO:0003824/GO:0006687/GO:0017040/GO:0016810/GO:0102121/GO:0006672//GO:0016020/GO:0016021	molecular_function/biological_process/cellular_component/	A0A1B0GW66/A0A1B0GTX9/A0A1B0GU70//A0A1B0GUQ5/A0A1B0GUJ3/A0A1B0GTD4/A0A1B0GU06/A0A1B0GVG2/A0A1B0GW48/A0A1B0GVJ1/A0A1B0GV95/A0A1B0GUB3/A0A1B0GVE7/A0A1B0GUA4/A0A1B0GWC9/A0A1B0GV88/A0A1B0GW30/A0A1B0GVL2/A0A1B0GV06/A0A1B0GU62/A0A1B0GUJ2/A0A1B0GTQ7/A0A1B0GTP7/A0A1B0GW68/A0A1B0GUH5/A0A1B0GVA8/A0A1B0GTA6/A0A1B0GVA3/A0A1B0GVC9/A0A1B0GVY5/A0A1B0GUG1/A0A1B0GTM3/A0A1B0GUE3/A0A1B0GUP1/A0A1B0GUW4/A0A1B0GTZ5/E7…
ENSG00000109787	1	-1.19823	1.19823	-0.253456	0.253456	0.558435	1.48495079449958e-9	ENSG00000109787	Kruppel like factor 3 [Source:HGNC Symbol;Acc:HGNC:16516]	KLF3		GO:0003676/GO:0005634/GO:0046872/GO:0005654/GO:0003677/GO:0005515/GO:0000977/GO:0000122/GO:1901653/GO:0000981/GO:0006357/GO:0007275/GO:0003700	molecular_function/cellular_component/biological_process	A0A024R9T8/
ENSG00000177076	1	-1.19809	1.19809	0.254115	-0.254115	0.797708	1.418222453222e-7	ENSG00000177076	alkaline ceramidase 2 [Source:HGNC Symbol;Acc:HGNC:23675]	ACER2		GO:0006919/GO:0010942/GO:0016020/GO:0016021/GO:0016787/GO:0005794/GO:0006629/GO:0006672/GO:0000139/GO:0016811/GO:0008284/GO:0030173/GO:0030148/GO:0001953/GO:0032526/GO:0046512/GO:0033629/GO:0035690/GO:0017040/GO:0102121/GO:0071633/GO:0090285	biological_process/cellular_component/molecular_function
ENSG00000182199	1	-1.19794	1.19794	-0.254821	0.254821	0.470886	1.61531e-06	ENSG00000182199	serine hydroxymethyltransferase 2 [Source:HGNC Symbol;Acc:HGNC:10852]	SHMT2	00260+2.1.2.1/00460+2.1.2.1/00680+2.1.2.1/00630+2.1.2.1/00670+2.1.2.1/	GO:0005634/GO:0005737/GO:0016020/GO:0016740/GO:0005739/GO:0005743/GO:0003824/GO:0006730/GO:0015630/GO:0005515/GO:0030170/GO:0005759/GO:0004372/GO:0019264/GO:0035999/GO:0070062/GO:0003682/GO:0070536/GO:0042645/GO:0051289/GO:0002082/GO:0008270/GO:0051262/GO:1903715/GO:0046655/GO:0042802/GO:0016597/GO:0046653/GO:0034340/GO:0006565/GO:0050897/GO:0070905/GO:0006544/GO:0006563/GO:1904482/GO:0008732/GO:…	cellular_component/molecular_function/biological_process	G3V2D2/G3V4T0/G3V4W5/H0YIZ0/G3V540/G3V2W0/G3V5L0/G3V2E4//G3V4X0/G3V3Y8/G3V241/G3V2Y4/G3V3C6/A0A024RB99/G3V2Y1
ENSG00000127914	1	-1.19787	1.19787	0.255144	-0.255144	0.592082	0.000244045	ENSG00000127914	A-kinase anchoring protein 9 [Source:HGNC Symbol;Acc:HGNC:379]	AKAP9		GO:0060307/GO:0005737/GO:0005794/GO:0043231/GO:0005813/GO:0003677/GO:0007165/GO:0005856/GO:0005515/GO:0032947/GO:0005795/GO:0005815/GO:0015459/GO:0005801/GO:0005829/GO:0000086/GO:0010389/GO:0097711/GO:0033138/GO:0044325/GO:0005102/GO:0007268/GO:0005088/GO:0000165/GO:0098978/GO:0060306/GO:0008076/GO:0034237/GO:0097060/GO:0086091/GO:0071320/GO:0007020/GO:0098962/GO:1901018/GO:0031116/GO:0098909/GO:…	biological_process/cellular_component/molecular_function	H0Y6Q0/Q6PJH3/H7BYL6/H7BZV6/A0A0A0MRE9/A0A087WX84/A0A2R8Y590//A0A0A0MRF6		hsa:10142	ko:K16551
ENSG00000173530	1	-1.19739	1.19739	0.257422	-0.257422	0.480876	8.04478e-05	ENSG00000173530	TNF receptor superfamily member 10d [Source:HGNC Symbol;Acc:HGNC:11907]	TNFRSF10D		GO:0016020/GO:0016021/GO:0006915/GO:0050900/GO:0005886/GO:0045569/GO:0007165/GO:0007166/GO:0042981/GO:0043066/GO:0004888	cellular_component/biological_process/molecular_function
ENSG00000141646	1	-1.19689	1.19689	-0.259733	0.259733	0.5118	5.42863874131229e-7	ENSG00000141646	SMAD family member 4 [Source:HGNC Symbol;Acc:HGNC:6770]	SMAD4		GO:0005634/GO:0006355/GO:0003700/GO:0005622/GO:0007179/GO:0005667/GO:0070373/GO:0010718/GO:0045944/GO:0005737/GO:0010614/GO:0060412/GO:0030513/GO:0030509/GO:0044212/GO:0045893/GO:0030511/GO:0046872/GO:0005813/GO:0005829/GO:0005654/GO:0003677/GO:0005515/GO:0042802/GO:0000981/GO:0000978/GO:0000987/GO:0016579/GO:0042803/GO:0071773/GO:0070412/GO:0000122/GO:0000790/GO:0045892/GO:0003712/GO:0001077/GO:…	cellular_component/biological_process/molecular_function	A0A024R274/K7ES96/A0A087WUF3/K7ENG8/K7ENG1/K7EIJ2/K7EL18/K7ELK2/K7EL15/K7EIU8	path:hsa04068/path:hsa05210/path:hsa05226/path:hsa04371/path:hsa04110/path:hsa04659/path:hsa05220/path:hsa04933/path:hsa05161/path:hsa05166/path:hsa04390/path:hsa04550/path:hsa05200/path:hsa04350/path:hsa04520/path:hsa04310/path:hsa05212/path:hsa05225	hsa:4089	ko:K04501	FoxO signaling pathway - Homo sapiens (human)/Colorectal cancer - Homo sapiens (human)/Gastric cancer - Homo sapiens (human)/Apelin signaling pathway - Homo sapiens (human)/Cell cycle - Homo sapiens (human)/Th17 cell differentiation - Homo sapiens (human)/Chronic myeloid leukemia - Homo sapiens (human)/AGE-RAGE signaling pathway in diabetic complications - Homo sapiens (human)/Hepatitis B - Homo …
ENSG00000100815	1	-1.19663	1.19661	-0.260948	0.260968	0.521834	4.88622e-05	ENSG00000100815	thyroid hormone receptor interactor 11 [Source:HGNC Symbol;Acc:HGNC:12305]	TRIP11		GO:0005737/GO:0016607/GO:0016020/GO:0005794/GO:0005634/GO:0005856/GO:1903508/GO:0005515/GO:0035735/GO:0005929/GO:0003713/GO:0006366/GO:0000139/GO:0030133/GO:0003281/GO:0003413/GO:0006486/GO:0007030/GO:0060122/GO:0060348/GO:0002079/GO:0002080/GO:0002081/GO:0005801/	cellular_component/biological_process/molecular_function/	G3V4R7//H0YJI2/H0YJ97
ENSG00000107262	1	-1.19661	1.19664	-0.260946	0.260923	0.519032	1.633038930624e-7	ENSG00000107262	BCL2 associated athanogene 1 [Source:HGNC Symbol;Acc:HGNC:937]	BAG1		GO:0051087/GO:0005634/GO:0005737/GO:0050790/GO:0005515/GO:0006915/GO:0005829/GO:0007166/GO:0043066/GO:1900034/GO:0000774/GO:0031625/GO:0051085/	molecular_function/cellular_component/biological_process/	/A0A0U1RR89/J3QTA2/F1LLU6/A0A0U1RQD7/C9J9Y9/C9JYK5
ENSG00000273015	1	-1.19636	1.19636	-0.262168	0.262168	0.640043	0.000285616
ENSG00000163703	1	-1.19635	1.19635	0.262184	-0.262185	1.2918	8.52298787742411e-9	ENSG00000163703	cysteine rich with EGF like domains 1 [Source:HGNC Symbol;Acc:HGNC:14630]	CRELD1		GO:0016020/GO:0016021/GO:0005509/GO:0062023/GO:0005201/GO:0003197/GO:0003279/	cellular_component/molecular_function/biological_process/	/H7C2L3/F8WBY3
ENSG00000008282	1	-1.19632	1.19632	-0.262351	0.262351	0.599243	1.63452632116616e-9	ENSG00000008282	synaptophysin like 1 [Source:HGNC Symbol;Acc:HGNC:11507]	SYPL1		GO:0016020/GO:0016021/GO:0008021/GO:0042470/GO:0031410/GO:0030659/GO:0070062/GO:0005887/GO:0007268/GO:0030141/GO:0030285	cellular_component/biological_process	/C9JYN0/H7C4J8/A4D0R1/A0A0U1RQT9		hsa:6856
ENSG00000073417	1	-1.19606	1.19606	0.263512	-0.263512	1.05443	5.10634164722884e-30	ENSG00000073417	phosphodiesterase 8A [Source:HGNC Symbol;Acc:HGNC:8793]	PDE8A		GO:0046872/GO:0006355/GO:0016787/GO:0007165/GO:0008081/GO:0004114/GO:0005829/GO:0070062/GO:0001934/GO:0007186/GO:0070374/GO:0004115/GO:0047555/GO:0019900/GO:0060548/GO:0006198/GO:0071364/GO:1903206/	molecular_function/biological_process/cellular_component/	E9PIJ0//H0YKR1/H0YNP3
ENSG00000179387	1	-1.19603	1.19603	0.263633	-0.263633	1.07648	1.13347340123247e-11	ENSG00000179387	ELMO domain containing 2 [Source:HGNC Symbol;Acc:HGNC:28111]	ELMOD2		GO:0016020/GO:0005096/GO:0043547/GO:0051607/GO:0050688	cellular_component/molecular_function/biological_process	D6RBS5/D6RHX2/V9GY58/D6RJB5/
ENSG00000138639	1	-1.19585	1.19585	-0.264458	0.264458	0.584003	0.000297494	ENSG00000138639	Rho GTPase activating protein 24 [Source:HGNC Symbol;Acc:HGNC:25361]	ARHGAP24		GO:0005737/GO:0007165/GO:0043547/GO:0005856/GO:0042995/GO:0005515/GO:0007275/GO:0030054/GO:0030154/GO:0005096/GO:0005925/GO:0005829/GO:0051056/GO:0005912/GO:0001525	cellular_component/biological_process/molecular_function	D6RHH1/D6RCP5//D6RBC2
ENSG00000148429	1	-1.19581	1.19581	0.264634	-0.264634	0.3448	0.000393201	ENSG00000148429	USP6 N-terminal like [Source:HGNC Symbol;Acc:HGNC:16858]	USP6NL		GO:0005794/GO:0005886/GO:0031410/GO:0005096/GO:0017137/GO:0006886/GO:0090630/GO:0043547/GO:0005829/GO:0032588/GO:0007030/GO:0048227/GO:0019068/GO:1903358/GO:0035526/	cellular_component/molecular_function/biological_process/	/V9GYH2/X6RAB3
ENSG00000075188	1	-1.1956	1.1956	-0.265591	0.265591	0.569953	9.47568857852339e-10	ENSG00000075188	nucleoporin 37 [Source:HGNC Symbol;Acc:HGNC:29929]	NUP37		GO:0051028/GO:0005634/GO:0015031/GO:0005654/GO:0051301/GO:0005694/GO:0007049/GO:0005643/GO:0007059/GO:0000775/GO:0000776/GO:0000777/GO:0005515/GO:0005829/GO:0006406/GO:0016032/GO:0005635/GO:0031080/	biological_process/cellular_component/molecular_function/	/F8VTY2/F8VXF5/H0YHK8
ENSG00000244457	1	-1.19552	1.19552	-0.265956	0.265956	1.55133	3.91021e-06
ENSG00000119878	1	-1.19441	1.19443	-0.270878	0.270858	0.592978	2.78346e-05	ENSG00000119878	CXXC repeat containing interactor of PDZ3 domain [Source:HGNC Symbol;Acc:HGNC:14312]	CRIPT		GO:0005737/GO:0005634/GO:0005730/GO:0001650/GO:0042995/GO:0005515/GO:0030054/GO:0045202/GO:0030425/GO:0008017/GO:0044877/GO:0014069/GO:0043197/GO:0030165/GO:0097110/GO:0035372/GO:0045184/GO:0043025/GO:0043198/GO:0031122/GO:1902897	cellular_component/molecular_function/biological_process
ENSG00000164116	1	-1.19419	1.19419	0.271844	-0.271844	5.44825	1.74478e-06	ENSG00000164116	guanylate cyclase 1 soluble subunit alpha 1 [Source:HGNC Symbol;Acc:HGNC:4685]	GUCY1A1	00230+4.6.1.2/	GO:0005737/GO:0000166/GO:0035556/GO:0016829/GO:0005525/GO:0005515/GO:0020037/GO:0016849/GO:0009190/GO:0004383/GO:0006182/GO:0038023/GO:0007263/GO:0008015/GO:0008074//GO:0005622/GO:0016020/GO:0016021/GO:0008217/GO:0010750/GO:0052565/GO:0060087	cellular_component/molecular_function/biological_process/	Q6PJR4//J3KPQ8/D6RF78/J3KQW2
ENSG00000135480	1	-1.19399	1.19399	-0.272746	0.272746	2.14726	3.29648763592886e-29	ENSG00000135480	keratin 7 [Source:HGNC Symbol;Acc:HGNC:6445]	KRT7		GO:0005634/GO:0005737/GO:0005198/GO:0005515/GO:0005882/GO:0045095/GO:0005829/GO:0070062/GO:0031424/GO:0016032/GO:0070268	cellular_component/molecular_function/biological_process	/A0A1W2PRP1
ENSG00000232316	1	-1.19395	1.19395	-0.272916	0.272916	2.37491	5.12269e-05
ENSG00000175215	1	-1.19383	1.19383	-0.273423	0.273423	0.845589	9.69655321582146e-13	ENSG00000175215	CTD small phosphatase 2 [Source:HGNC Symbol;Acc:HGNC:17077]	CTDSP2		GO:0005634/GO:0046872/GO:0016787/GO:0016311/GO:0004721/GO:0005515/GO:0016791/GO:0001933/GO:2000134/GO:0005654/GO:0006470/GO:0008420/GO:0036498/	cellular_component/molecular_function/biological_process/	H0YI29/H0YI12/A0A024RBA6/F8W184/F8W1I1/F8VYL0		hsa:10106	ko:K15731
ENSG00000185262	1	-1.19356	1.19356	-0.274634	0.274634	1.49394	1.86536110073546e-18	ENSG00000185262	UBA like domain containing 2 [Source:HGNC Symbol;Acc:HGNC:28438]	UBALD2				/K7EMI7/K7ERK7
ENSG00000107984	1	-1.19332	1.19332	-0.275643	0.275643	1.10325	1.69374354780546e-25	ENSG00000107984	dickkopf WNT signaling pathway inhibitor 1 [Source:HGNC Symbol;Acc:HGNC:2891]	DKK1		GO:0005615/GO:2000726/GO:0090090/GO:0060394/GO:0010469/GO:0005576/GO:0007275/GO:0005515/GO:0016055/GO:0030178/GO:0005886/GO:1900116/GO:0000122/GO:0000904/GO:0001706/GO:0001707/GO:0001942/GO:0007492/GO:0007611/GO:0010628/GO:0030111/GO:0030279/GO:0030326/GO:0030514/GO:0030900/GO:0032526/GO:0043066/GO:0048642/GO:0050807/GO:0051966/GO:0060173/GO:0060323/GO:0060325/GO:0061743/GO:0090082/GO:0090244/GO:…	cellular_component/biological_process/molecular_function	I1W660	path:hsa04310/path:hsa05010	hsa:22943	ko:K02165	Wnt signaling pathway - Homo sapiens (human)/Alzheimer disease - Homo sapiens (human)
ENSG00000177425	1	-1.1933	1.1933	-0.275763	0.275763	0.679854	3.95500501465866e-23	ENSG00000177425	pro-apoptotic WT1 regulator [Source:HGNC Symbol;Acc:HGNC:8614]	PAWR		GO:0005634/GO:0005737/GO:0003779/GO:0006915/GO:0005515/GO:0005884/GO:0043065/GO:0019899/GO:0051017/GO:0003714/GO:0000122/GO:0043522/GO:0010628/GO:0010629/GO:0030889/GO:0042094/GO:0042130/GO:0042986/GO:0048147/GO:0050860/GO:0097190/GO:1901300/GO:2000774/GO:0000790/	cellular_component/molecular_function/biological_process/	/H0YI16/A0A0B4J260/H0YHP5/F8W1M8
ENSG00000154079	1	-1.19329	1.19329	-0.275774	0.275774	1.41077	1.58508010801574e-11	ENSG00000154079	succinate dehydrogenase complex assembly factor 4 [Source:HGNC Symbol;Acc:HGNC:20957]	SDHAF4		GO:0008177/GO:0005739/GO:0005759/GO:0003674/GO:0005575/GO:0034553/GO:0005749/GO:0045333/GO:0003407/GO:0045087	molecular_function/cellular_component/biological_process
ENSG00000169813	1	-1.1932	1.1932	-0.276156	0.276156	0.493824	1.69599e-05	ENSG00000169813	heterogeneous nuclear ribonucleoprotein F [Source:HGNC Symbol;Acc:HGNC:5039]	HNRNPF		GO:0003676/GO:0003723/GO:0006397/GO:0008380/GO:0005634/GO:0016020/GO:0005829/GO:0005654/GO:0005515/GO:0005681/GO:0000398/GO:0071013/GO:0005886/GO:0043484/GO:0035722/GO:0008543/GO:0016070/GO:0006396/GO:0003727/GO:0008134/GO:0017025	molecular_function/biological_process/cellular_component	A0A024R7T3/A0A1B0GW42		hsa:3185	ko:K12898
ENSG00000227345	1	-1.19304	1.19304	-0.276868	0.276868	0.662497	3.24635141090394e-14	ENSG00000227345	poly(ADP-ribose) glycohydrolase [Source:HGNC Symbol;Acc:HGNC:8605]	PARG		GO:0005634/GO:0005737/GO:0043231/GO:0005829/GO:0005654/GO:0016787/GO:0005975/GO:0005739/GO:0005759/GO:0005515/GO:1990966/GO:0004649/GO:0006282/GO:0009225/	cellular_component/molecular_function/biological_process/	/A0A087WXI6/A0A087WX07
ENSG00000166750	1	-1.19274	1.19272	0.27821	-0.278198	1.08077	1.18468924493637e-13	ENSG00000166750	schlafen family member 5 [Source:HGNC Symbol;Acc:HGNC:28286]	SLFN5		GO:0005634/GO:0000166/GO:0005524/GO:0030154	cellular_component/molecular_function/biological_process	/B4E128
ENSG00000122912	1	-1.19269	1.19269	0.278381	-0.278381	0.490812	0.000162273	ENSG00000122912	solute carrier family 25 member 16 [Source:HGNC Symbol;Acc:HGNC:10986]	SLC25A16		GO:0016020/GO:0016021/GO:0055085/GO:0005739/GO:0005743/GO:0022857/GO:0015297/GO:0006839/GO:0015291/GO:0009108/	cellular_component/biological_process/molecular_function/	V9GY06/V9GYB8//V9GYA5/V9GZ24
ENSG00000071575	1	-1.19262	1.19262	0.278659	-0.278659	1.57726	6.71621475629382e-18	ENSG00000071575	tribbles pseudokinase 2 [Source:HGNC Symbol;Acc:HGNC:30809]	TRIB2		GO:0045599/GO:0006469/GO:0005737/GO:0006468/GO:0005856/GO:0004860/GO:0005634/GO:0032436/GO:0043405/GO:0031625/GO:0008134/GO:0031434/GO:0055106/GO:0045081/GO:0004672/GO:0005524	biological_process/cellular_component/molecular_function	B5MCX4/F8WA18/
ENSG00000144713	1	-1.19176	1.19176	-0.282324	0.282324	1.37681	1.98199928911368e-52	ENSG00000144713	ribosomal protein L32 [Source:HGNC Symbol;Acc:HGNC:10336]	RPL32		GO:0003723/GO:0016020/GO:0006412/GO:0002181/GO:0005622/GO:0003735/GO:0005840/GO:0022625/GO:0005829/GO:0006413/GO:0000184/GO:0006614/GO:0042788	molecular_function/cellular_component/biological_process	D3YTB1/A0A024R2G7/F8W727/D3YTI8	path:hsa03010	hsa:6161	ko:K02912	Ribosome - Homo sapiens (human)
ENSG00000179195	1	-1.19173	1.19174	-0.282449	0.282437	1.0963	2.35050149296036e-26	ENSG00000179195	zinc finger protein 664 [Source:HGNC Symbol;Acc:HGNC:25406]	ZNF664		GO:0003676/GO:0005634/GO:0046872/GO:0003677/GO:0006357/GO:0000981/GO:0003674/GO:0008150	molecular_function/cellular_component/biological_process	A0A024RBR7		hsa:144348
ENSG00000136002	1	-1.19163	1.19161	0.282935	-0.282917	0.683177	4.19103647571325e-11	ENSG00000136002	Rho guanine nucleotide exchange factor 4 [Source:HGNC Symbol;Acc:HGNC:684]	ARHGEF4		GO:0005622/GO:0035556/GO:0005085/GO:0005089/GO:0035023//GO:0005737/GO:0016020/GO:0005886/GO:0042995/GO:0005515/GO:0005829/GO:0051056/GO:0032587/GO:0007186/GO:0046847/GO:0019904/GO:0030032/GO:0043065/GO:0030676	cellular_component/biological_process/molecular_function/	/H0Y451/A0A0C4DFY6/E9PEM0/A0A087X0P1/A4QPB6/E7EV07/A0A1B0GW00/H0YCT6
ENSG00000271816	1	-1.19092	1.19092	-0.285862	0.285862	1.03601	4.97931e-06
ENSG00000102359	1	-1.19056	1.19056	-0.287325	0.287325	0.785891	1.85583209148237e-22	ENSG00000102359	sushi repeat containing protein X-linked 2 [Source:HGNC Symbol;Acc:HGNC:30668]	SRPX2		GO:0005737/GO:0007155/GO:0005576/GO:0030054/GO:0005615/GO:0045202/GO:0009986/GO:0005515/GO:0042802/GO:0005102/GO:0001525/GO:0051965/GO:0098609/GO:0036458/GO:0042325/GO:0048870/GO:0071625/GO:0090050/GO:0060076/GO:0097060/	cellular_component/biological_process/molecular_function/	A0A1W2PR88/A0A1W2PNZ6//A0A1W2PRB1
ENSG00000158786	1	-1.19029	1.19029	0.288466	-0.288465	2.77574	1.97154310731844e-24	ENSG00000158786	phospholipase A2 group IIF [Source:HGNC Symbol;Acc:HGNC:30040]	PLA2G2F	00592+3.1.1.4/00564+3.1.1.4/00591+3.1.1.4/00590+3.1.1.4/00565+3.1.1.4	GO:0016020/GO:0046872/GO:0016787/GO:0005509/GO:0006629/GO:0016042/GO:0005886/GO:0005576/GO:0002376/GO:0045087/GO:0004623/GO:0102567/GO:0102568/GO:0006644/GO:0050482/GO:0042130/GO:0005829/GO:0008150/GO:0005543/GO:0006654/GO:0047498/GO:0036148/GO:0036149/GO:0036150/GO:0036151/GO:0036152	cellular_component/molecular_function/biological_process
ENSG00000183762	1	-1.19019	1.19019	-0.288877	0.288877	0.470998	2.26304e-06	ENSG00000183762	kringle containing transmembrane protein 1 [Source:HGNC Symbol;Acc:HGNC:17550]	KREMEN1		GO:0016020/GO:0016021/GO:0005886/GO:0006915/GO:0016055/GO:0090090/GO:0005515/GO:0007154/GO:0060828/GO:0060173/GO:0030279/	cellular_component/biological_process/molecular_function/	/H7BZ87
ENSG00000116016	1	-1.18967	1.18966	-0.291021	0.291033	1.08874	3.02365234290618e-50	ENSG00000116016	endothelial PAS domain protein 1 [Source:HGNC Symbol;Acc:HGNC:3374]	EPAS1		GO:0005634/GO:0005737/GO:0046983/GO:0006355/GO:0003700/GO:0005667/GO:0016607/GO:0003677/GO:0005515/GO:0007275/GO:0030154/GO:0000981/GO:0006357/GO:0045944/GO:0005654/GO:0005829/GO:0043687/GO:0001525/GO:0046982/GO:0007165/GO:0006366/GO:0120162/GO:0071456/GO:0043565/GO:0008134/GO:0035035/GO:0061418/GO:0001666/GO:0001077/GO:0001892/GO:0001974/GO:0002027/GO:0006979/GO:0007005/GO:0007601/GO:0030097/GO:…	cellular_component/molecular_function/biological_process	/C9J9N2
ENSG00000144366	1	-1.18963	1.18963	0.291152	-0.291152	0.827072	1.34388750005042e-11	ENSG00000144366	GULP engulfment adaptor PTB domain containing 1 [Source:HGNC Symbol;Acc:HGNC:18649]	GULP1		GO:0005737/GO:0006915/GO:0006869/GO:0006909/GO:0006911/	cellular_component/biological_process/	B8ZZL1/H0Y6R1/H7BZV7/
ENSG00000122641	1	-1.18939	1.18941	-0.29213	0.292105	0.444545	0.000937434	ENSG00000122641	inhibin subunit beta A [Source:HGNC Symbol;Acc:HGNC:6066]	INHBA		GO:0010628/GO:0008083/GO:0010469/GO:0005576/GO:0005515/GO:0030218/GO:0005179/GO:0030154/GO:0045893/GO:0005615/GO:0007399/GO:0006952/GO:0045944/GO:0008285/GO:0005102/GO:0034711/GO:0046982/GO:0001707/GO:0002244/GO:0048333/GO:0051799/GO:0060279/GO:0061029/GO:0071372/GO:0071397/GO:0043512/GO:0048471/GO:0042981/GO:0008584/GO:0006357/GO:0042802/GO:0060395/GO:0030308/GO:0005125/GO:0005160/GO:0010862/GO:…	biological_process/molecular_function/cellular_component	A4D1W7	path:hsa04060/path:hsa04550/path:hsa04350	hsa:3624	ko:K04667	Cytokine-cytokine receptor interaction - Homo sapiens (human)/Signaling pathways regulating pluripotency of stem cells - Homo sapiens (human)/TGF-beta signaling pathway - Homo sapiens (human)
ENSG00000243317	1	-1.18907	1.18907	0.293468	-0.293468	0.516547	6.37431026685165e-8	ENSG00000243317	short transmembrane mitochondrial protein 1 [Source:HGNC Symbol;Acc:HGNC:41909]	STMP1		/GO:0016020/GO:0016021/GO:0005739/GO:0031966	/cellular_component	A0A096LP97/
ENSG00000111266	1	-1.1881	1.1881	-0.297366	0.297366	1.2662	5.68040233724561e-19	ENSG00000111266	dual specificity phosphatase 16 [Source:HGNC Symbol;Acc:HGNC:17909]	DUSP16	04658+3.1.3.16/04660+3.1.3.16/	GO:0005634/GO:0005737/GO:0005654/GO:0016787/GO:0004721/GO:0006470/GO:0004725/GO:0016311/GO:0035335/GO:0016791/GO:0008138/GO:0017017/GO:0031410/GO:0000188/GO:0043409/GO:0005829/GO:0045204/GO:0045209/	cellular_component/molecular_function/biological_process/	A0A024RAR2/F5H5X4/	path:hsa04010	hsa:80824	ko:K04459	MAPK signaling pathway - Homo sapiens (human)
ENSG00000072422	1	-1.18798	1.18798	0.297821	-0.297821	1.47326	3.37079457487766e-13	ENSG00000072422	Rho related BTB domain containing 1 [Source:HGNC Symbol;Acc:HGNC:18738]	RHOBTB1		GO:0000166/GO:0003924/GO:0005525/GO:0005622/GO:0007264/GO:0005886/GO:0005737/GO:0005829/GO:0051056/GO:0019901/GO:0007266/GO:0030838/GO:0030036/GO:0016477/GO:0007015/GO:0043652/GO:0000902/GO:0031532	molecular_function/cellular_component/biological_process	A0A024QZL4	path:hsa04120	hsa:9886	ko:K07868	Ubiquitin mediated proteolysis - Homo sapiens (human)
ENSG00000184575	1	-1.18767	1.18764	0.299151	-0.29912	0.505319	2.56737e-06	ENSG00000184575	exportin for tRNA [Source:HGNC Symbol;Acc:HGNC:12826]	XPOT		GO:0003723/GO:0005634/GO:0005737/GO:0006886/GO:0005829/GO:0005654/GO:0008536/GO:0000049/GO:0005643/GO:0006409/GO:0071528/GO:0016363/	molecular_function/cellular_component/biological_process/	/F5GYW6/F8WDU6/F5GZM3
ENSG00000106541	1	-1.18766	1.18766	0.299117	-0.299117	1.72087	1.41660032386593e-11	ENSG00000106541	anterior gradient 2 protein disulphide isomerase family member [Source:HGNC Symbol;Acc:HGNC:328]	AGR2		GO:0005783/GO:0042803/GO:0005515/GO:0005576/GO:0005615/GO:0010628/GO:0002162/GO:0060548/GO:0005154/GO:1903078/GO:0010811/GO:0045742/GO:0048546/GO:0048639/GO:0060480/GO:0070254/GO:1903896/GO:1903899/	cellular_component/molecular_function/biological_process/	B5MC07/Q4JM46/C9J3E2/H7C3Z9		hsa:10551	ko:K20356
ENSG00000137269	1	-1.18764	1.18764	-0.299188	0.299188	0.488022	1.14897419448186e-10	ENSG00000137269	leucine rich repeat containing 1 [Source:HGNC Symbol;Acc:HGNC:14307]	LRRC1		GO:0005737/GO:0016020/GO:0005829/	cellular_component/	/Q5T0G3
ENSG00000131203	1	-1.18762	1.18762	-0.299269	0.299269	2.82865	0.000789887	ENSG00000131203	indoleamine 2 3-dioxygenase 1 [Source:HGNC Symbol;Acc:HGNC:6059]	IDO1	00380+1.13.11.11/	GO:0046872/GO:0020037/GO:0019441/GO:0005737/GO:0016491/GO:0055114/GO:0005829/GO:0051213/GO:0022900/GO:0002376/GO:0070234/GO:0009055/GO:0006569/GO:0007565/GO:0004833/GO:0033754/GO:0002534/GO:0002666/GO:0002678/GO:0002830/GO:0006954/GO:0032496/GO:0032693/GO:0032735/GO:0033555/GO:0034276/GO:0036269/GO:0042130/GO:0043065/GO:0070233/GO:0030485/GO:0032421	molecular_function/biological_process/cellular_component	J3KN03/A0A140T9Z2/E5RIX2/E5RH36/
ENSG00000117151	1	-1.18752	1.18749	-0.299705	0.299739	0.380554	0.000859767	ENSG00000117151	chitobiase [Source:HGNC Symbol;Acc:HGNC:2496]	CTBS	00520+3.2.1.14/	GO:0016787/GO:0005975/GO:0004553/GO:0016798/GO:0008152/GO:0005615/GO:0008061/GO:0005764/GO:0004568/GO:0006032/GO:0009313/	molecular_function/biological_process/cellular_component/	/F6X5H7
ENSG00000214290	1	-1.18743	1.18743	0.300024	-0.300024	2.49622	5.14122029014084e-11	ENSG00000214290	colorectal cancer associated 2 [Source:HGNC Symbol;Acc:HGNC:26978]	COLCA2		GO:0005737/	cellular_component/	A0A0A0MTE5/A0A1W2PQW7/
ENSG00000271383	1	-1.1873	1.1873	-0.300531	0.300531	0.414554	0.000777173	ENSG00000271383	NBPF member 19 [Source:HGNC Symbol;Acc:HGNC:31999]	NBPF19		GO:0005737/	cellular_component/	/A0A075B6G5/A0A087X230/A0A087X288
ENSG00000130768	1	-1.18716	1.18716	-0.301077	0.301077	0.503858	0.000148841	ENSG00000130768	sphingomyelin phosphodiesterase acid like 3B [Source:HGNC Symbol;Acc:HGNC:21416]	SMPDL3B		GO:0016020/GO:0005615/GO:0046872/GO:0016787/GO:0006629/GO:0016042/GO:0005886/GO:0005576/GO:0016798/GO:0008152/GO:0006954/GO:0002376/GO:0045087/GO:0031225/GO:0070062/GO:0008150/GO:0050728/GO:0004767/GO:0006685/GO:0034122/GO:0008081/GO:0046466/	cellular_component/molecular_function/biological_process/	F8VWW8//Q5T0Y8/F8VXS3
ENSG00000198162	1	-1.18707	1.18707	-0.301442	0.301442	0.536002	4.46040199235768e-7	ENSG00000198162	mannosidase alpha class 1A member 2 [Source:HGNC Symbol;Acc:HGNC:6822]	MAN1A2	00513+3.2.1.113/00510+3.2.1.113	GO:0016020/GO:0016021/GO:0005794/GO:0046872/GO:0016787/GO:0005509/GO:0003824/GO:0016798/GO:0008152/GO:0004571/GO:0000139/GO:0006486/GO:0005783/GO:0070062/GO:0006491/GO:0007585/GO:0009100/GO:0048286/GO:1904381	cellular_component/molecular_function/biological_process	Q5T9E3/H0Y543/H0Y7H1/
ENSG00000215256	1	-1.18667	1.18667	-0.303003	0.303003	0.537798	6.73178891633892e-8
ENSG00000165406	1	-1.18661	1.18661	-0.303231	0.303231	1.43582	2.21894244507007e-66	ENSG00000165406	membrane associated ring-CH-type finger 8 [Source:HGNC Symbol;Acc:HGNC:23356]	MARCH8		GO:0016020/GO:0016021/GO:0008270/GO:0046872/GO:0016740/GO:0016567/GO:0005765/GO:0004842/GO:0031410/GO:0030659/GO:0002376/GO:0005764/GO:0002250/GO:0005768/GO:0031901/GO:0000209/	cellular_component/molecular_function/biological_process/	A0A0A0MSM7//A0A024R7U2		hsa:220972	ko:K10656
ENSG00000183726	1	-1.18633	1.18633	-0.304334	0.304334	0.438441	7.4278082998432e-10	ENSG00000183726	transmembrane protein 50A [Source:HGNC Symbol;Acc:HGNC:30590]	TMEM50A		GO:0016020/GO:0016021/GO:0005783/GO:0032511/GO:0005737/GO:0043025/GO:0097386	cellular_component/biological_process	Q7RU07		hsa:23585
ENSG00000261040	1	-1.18626	1.18626	-0.304591	0.304591	2.10898	1.03582530103485e-12
ENSG00000160191	1	-1.18572	1.18572	-0.306709	0.306706	0.473428	0.000591846	ENSG00000160191	phosphodiesterase 9A [Source:HGNC Symbol;Acc:HGNC:8795]	PDE9A		GO:0005737/GO:0016020/GO:0046872/GO:0005783/GO:0016787/GO:0007165/GO:0005794/GO:0005829/GO:0005886/GO:0042995/GO:0005515/GO:0048471/GO:0008081/GO:0004114/GO:0042383/GO:0032587/GO:0047555/GO:0046069/GO:0010613/GO:0046068/GO:0005622/GO:0019934/GO:0043204	cellular_component/molecular_function/biological_process	A0A0S2Z475/A0A0S2Z4T6/A0A0S2Z4A3/	path:hsa00230/path:hsa01100	hsa:5152	ko:K13761	Purine metabolism - Homo sapiens (human)/Metabolic pathways - Homo sapiens (human)
ENSG00000132155	1	-1.18571	1.18572	-0.306727	0.306718	1.31037	1.5330909385636e-49	ENSG00000132155	Raf-1 proto-oncogene serine/threonine kinase [Source:HGNC Symbol;Acc:HGNC:9829]	RAF1		GO:0008285/GO:0005634/GO:0005737/GO:0016607/GO:0016020/GO:0046872/GO:0000166/GO:0004672/GO:0004674/GO:0005524/GO:0006468/GO:0016740/GO:0016301/GO:0016310/GO:0035556/GO:0007165/GO:0005829/GO:0005739/GO:0005886/GO:0005515/GO:0042802/GO:0033138/GO:0034220/GO:0042981/GO:0043066/GO:0019899/GO:0030168/GO:0005794/GO:0000165/GO:0008283/GO:0031333/GO:0043154/GO:0006915/GO:0002223/GO:0042060/GO:2000145/GO:…	biological_process/cellular_component/molecular_function/	A0A0B4J1W9/H7C155/A0A0S2Z559/
ENSG00000109016	1	-1.18559	1.18559	-0.307223	0.307223	0.731399	1.24581560713117e-9	ENSG00000109016	dehydrogenase/reductase 7B [Source:HGNC Symbol;Acc:HGNC:24547]	DHRS7B		GO:0016020/GO:0016021/GO:0016491/GO:0055114/GO:0005783/GO:0005789/GO:0003674/GO:0008150/GO:0008611	cellular_component/molecular_function/biological_process	/J3KRS1/J3QKT1/J3QLK1/A0A0C4DGQ8/J3QLJ8
ENSG00000242147	1	-1.1853	1.18531	-0.308304	0.308303	0.850288	3.70080721553535e-11
ENSG00000071282	1	-1.18502	1.18502	0.309397	-0.309397	1.81365	3.91524373767671e-47	ENSG00000071282	LIM and cysteine rich domains 1 [Source:HGNC Symbol;Acc:HGNC:6633]	LMCD1		GO:0005634/GO:0005737/GO:0008270/GO:0046872/GO:0003714/GO:0005654/GO:0044267/GO:0070886/GO:0000122/GO:0010611/	cellular_component/molecular_function/biological_process/	H7C3D2/F8WB09/B4DEY6//C9IYS1
ENSG00000109381	1	-1.18489	1.18489	-0.309897	0.309897	0.676319	3.53521000957483e-22	ENSG00000109381	E74 like ETS transcription factor 2 [Source:HGNC Symbol;Acc:HGNC:3317]	ELF2		GO:0005634/GO:0005829/GO:0005654/GO:0006355/GO:0003677/GO:0003700/GO:0043565/GO:0005515/GO:0016604/GO:0045893/GO:0000981/GO:0030154/GO:0006357/GO:0050855/	cellular_component/biological_process/molecular_function/	D6R9B1/D6RHI1/B7Z720/D6RGD9/
ENSG00000136044	1	-1.18484	1.18484	-0.31008	0.31008	0.613672	6.79889295784048e-7	ENSG00000136044	adaptor protein phosphotyrosine interacting with PH domain and leucine zipper 2 [Source:HGNC Symbol;Acc:HGNC:18242]	APPL2		GO:0005634/GO:0016020/GO:0005515/GO:0007165/GO:0007049/GO:0005768/GO:0070062/GO:0031901/GO:0010008/GO:0008283/GO:0016581/	cellular_component/molecular_function/biological_process/	H0YH86/F8VXB0/F8VWV2/F8VS86/F8W124//F8VR68
ENSG00000134709	1	-1.18481	1.18482	-0.310196	0.310182	0.551644	4.0565e-05	ENSG00000134709	hook microtubule tethering protein 1 [Source:HGNC Symbol;Acc:HGNC:19884]	HOOK1		/GO:0005737/GO:0015031/GO:0005829/GO:0005856/GO:0005515/GO:0007275/GO:0005874/GO:0030154/GO:0007283/GO:0042802/GO:0008333/GO:0045022/GO:0005813/GO:0008017/GO:0051959/GO:0030705/GO:0031122/GO:0007040/GO:0007032/GO:0030897/GO:0070695/GO:0003779/GO:0007030/GO:0007286/GO:1905198/GO:0015630	/cellular_component/biological_process/molecular_function	B1AK95/
ENSG00000197442	1	-1.18461	1.18463	0.310918	-0.31093	1.01351	1.19463e-06	ENSG00000197442	mitogen-activated protein kinase kinase kinase 5 [Source:HGNC Symbol;Acc:HGNC:6857]	MAP3K5		GO:0005737/GO:0046872/GO:0000166/GO:0004672/GO:0004674/GO:0005524/GO:0006468/GO:0016740/GO:0005783/GO:0016301/GO:0016310/GO:0042803/GO:0005515/GO:0006915/GO:0000287/GO:0004709/GO:0002376/GO:0045087/GO:0042802/GO:0005829/GO:0043065/GO:0016032/GO:0000165/GO:0032991/GO:0019904/GO:0019903/GO:0070059/GO:0045893/GO:0008631/GO:0007254/GO:0000186/GO:0034976/GO:0097190/GO:1990604/GO:0007257/GO:1901216/GO:…	cellular_component/molecular_function/biological_process
ENSG00000120899	1	-1.18453	1.18453	0.31128	-0.31128	0.629157	7.2675581468188e-8	ENSG00000120899	protein tyrosine kinase 2 beta [Source:HGNC Symbol;Acc:HGNC:9612]	PTK2B	04660+2.7.10.2	GO:0010595/GO:0005634/GO:0005737/GO:0016020/GO:0000166/GO:0004672/GO:0005524/GO:0006468/GO:0016740/GO:0016301/GO:0016310/GO:0007165/GO:0004713/GO:0005886/GO:0005856/GO:0042995/GO:0005515/GO:0004715/GO:0048471/GO:0030054/GO:0007229/GO:0002376/GO:0005925/GO:0030500/GO:0002250/GO:0030334/GO:0030155/GO:0030154/GO:0045765/GO:0042127/GO:0002040/GO:0005829/GO:2000114/GO:0030027/GO:0008285/GO:0005938/GO:…	biological_process/cellular_component/molecular_function	E5RK84/E5RHL2/E5RJ77/H0YB74/C9JHV9/
ENSG00000205542	1	-1.1845	1.1845	0.311367	-0.311367	0.300589	5.62066680305954e-7	ENSG00000205542	thymosin beta 4 X-linked [Source:HGNC Symbol;Acc:HGNC:11881]	TMSB4X		GO:0003723/GO:0005737/GO:0007015/GO:0003779/GO:0005856/GO:0005515/GO:0005576/GO:0003785/GO:0030334/GO:0042989/GO:0002576/GO:0005829/GO:0031093/GO:0005634/GO:0019899/GO:0005622/GO:0043536/GO:2001171/GO:0033209/GO:0007253/GO:0032088/GO:0050727/GO:1901222/GO:1901223/GO:1903026/GO:1905273/GO:2000483/GO:2001028	molecular_function/cellular_component/biological_process	A2VCK8	path:hsa04810	hsa:7114	ko:K05764	Regulation of actin cytoskeleton - Homo sapiens (human)
ENSG00000123342	1	-1.18433	1.18433	-0.312023	0.312023	1.65293	3.05152910499157e-23	ENSG00000123342	matrix metallopeptidase 19 [Source:HGNC Symbol;Acc:HGNC:7165]	MMP19		GO:0006508/GO:0004222/GO:0008270/GO:0046872/GO:0016787/GO:0008233/GO:0005576/GO:0007275/GO:0008237/GO:0031012/GO:0030154/GO:0004252/GO:0001525/GO:0022617/GO:0030574/GO:0001541/GO:0001542/GO:0001554/GO:0009725/GO:0051591	biological_process/molecular_function/cellular_component	F8W1C3//A6ND33/B4DNP3
ENSG00000139168	1	-1.18405	1.18405	-0.313079	0.313079	0.470418	0.000149463	ENSG00000139168	zinc finger CCHC-type and RNA binding motif containing 1 [Source:HGNC Symbol;Acc:HGNC:29620]	ZCRB1		GO:0003676/GO:0003723/GO:0006397/GO:0008380/GO:0005634/GO:0008270/GO:0046872/GO:0005681/GO:0005654/GO:0000398/GO:0005689	molecular_function/biological_process/cellular_component	A0A024R106/F8VXY6/G3V1V1		hsa:85437	ko:K13154
ENSG00000070961	1	-1.18401	1.18404	-0.313208	0.313179	0.460487	0.000565846	ENSG00000070961	ATPase plasma membrane Ca2+ transporting 1 [Source:HGNC Symbol;Acc:HGNC:814]	ATP2B1		GO:0016020/GO:0016021/GO:0046872/GO:0005634/GO:0000166/GO:0005524/GO:0016787/GO:0005886/GO:0006811/GO:0005388/GO:0006816/GO:0070588/GO:0099132/GO:0099509/GO:0005516/GO:0005887/GO:0005515/GO:0070062/GO:0034220/GO:0030165/GO:0098978/GO:1903779/GO:0006874/GO:0098982/GO:0051480/GO:0015085/GO:1905056/GO:1990034/GO:0003407/GO:0007420/GO:0007568/GO:0009409/GO:0071305/GO:0071386/GO:1901660/GO:0009898/GO:…	cellular_component/molecular_function/biological_process	A0A0U1RQU3/A0A024RBC7/F8W1V5/E7ERY9/H0YHH6/	path:hsa04020/path:hsa04972/path:hsa04024/path:hsa04978/path:hsa04970/path:hsa04261/path:hsa04961/path:hsa04022/path:hsa04925	hsa:490	ko:K05850	Calcium signaling pathway - Homo sapiens (human)/Pancreatic secretion - Homo sapiens (human)/cAMP signaling pathway - Homo sapiens (human)/Mineral absorption - Homo sapiens (human)/Salivary secretion - Homo sapiens (human)/Adrenergic signaling in cardiomyocytes - Homo sapiens (human)/Endocrine and other factor-regulated calcium reabsorption - Homo sapiens (human)/cGMP-PKG signaling pathway - Homo…
ENSG00000129116	1	-1.18368	1.18368	-0.314471	0.314471	0.616201	1.24215181185794e-17	ENSG00000129116	palladin cytoskeletal associated protein [Source:HGNC Symbol;Acc:HGNC:17068]	PALLD		GO:0005737/GO:0005829/GO:0003779/GO:0005886/GO:0015629/GO:0030036/GO:0005856/GO:0042995/GO:0005515/GO:0030054/GO:0016477/GO:0005925/GO:0007411/GO:0030424/GO:0030027/GO:0030426/GO:0002102/GO:0005634/GO:0030018/GO:0001726/GO:0098632/GO:0007156/GO:0070593/GO:0005884/GO:0051371/GO:0007010/GO:0003334/GO:0003382/	cellular_component/molecular_function/biological_process/	D6RBB1/D6RBH5/H0Y952/D6R9F5/H0YA05/F8WA26/B2RTX2/D6R948/D6R9Z5/
ENSG00000134077	1	-1.18356	1.18357	0.314924	-0.314933	1.29791	1.09151835499736e-23	ENSG00000134077	THUMP domain containing 3 [Source:HGNC Symbol;Acc:HGNC:24493]	THUMPD3		GO:0003723/GO:0005730/GO:0005829/GO:0008168/GO:0016740/GO:0032259/GO:0030488/GO:0016423/	molecular_function/cellular_component/biological_process/	A0A024R2F4/H7C0R6/H7C3J3/C9J9V2/C9JP31
ENSG00000104904	1	-1.18336	1.18336	-0.315693	0.315693	0.355	3.39505e-05	ENSG00000104904	ornithine decarboxylase antizyme 1 [Source:HGNC Symbol;Acc:HGNC:8095]	OAZ1		GO:0005829/GO:0008073/GO:0006595/GO:0043086/GO:0005634/GO:0045732/GO:0005737/GO:0005515/GO:0006596/GO:0090316/GO:0006521/GO:1902268	cellular_component/molecular_function/biological_process	J3QQY4/K7EPM6/K7ERW1/
ENSG00000165730	1	-1.18281	1.18281	-0.317743	0.317743	1.54492	9.51401464860516e-11	ENSG00000165730	storkhead box 1 [Source:HGNC Symbol;Acc:HGNC:23508]	STOX1		GO:0005634/GO:0005737/GO:0005829/GO:0005654/GO:0003677/GO:0051301/GO:0001650/GO:0005856/GO:0005515/GO:0007049/GO:0005730/GO:0005813/GO:0005815/GO:0010800/GO:0033138/GO:0010628/GO:0008284/GO:0010629/GO:0010971/GO:0010821/GO:0000977/GO:0061418/GO:1902882/GO:0010468/GO:0051881/GO:0045787/GO:0048839/GO:0050679/GO:0051897/GO:0071500/GO:1901858/GO:1904031/GO:1904120/GO:0005938/	cellular_component/molecular_function/biological_process/	A0A2R8Y5I4/
ENSG00000145555	1	-1.18272	1.18271	-0.318108	0.318118	1.12557	1.43648928684541e-57	ENSG00000145555	myosin X [Source:HGNC Symbol;Acc:HGNC:7593]	MYO10		GO:0005737/GO:0016020/GO:0000166/GO:0005524/GO:0005730/GO:0005829/GO:0007165/GO:0003774/GO:0003779/GO:0016459/GO:0005886/GO:0005856/GO:0042995/GO:0005515/GO:0038096/GO:0005516/GO:0051015/GO:0030027/GO:0005938/GO:0005547/GO:0008360/GO:0001726/GO:0030507/GO:0030705/GO:0031527/GO:0051489/GO:0030898/GO:0032433/GO:0060002/GO:0022409/GO:0030175/GO:0043005/GO:0043025	cellular_component/molecular_function/biological_process	E9PEW5/E9PCN3/D6RGD1//A0A0A0MQX1
ENSG00000196189	1	-1.1826	1.1826	0.318517	-0.318517	1.192	7.80576511669646e-8	ENSG00000196189	semaphorin 4A [Source:HGNC Symbol;Acc:HGNC:10729]	SEMA4A		/GO:0016020/GO:0016021/GO:0043231/GO:0005634/GO:0005829/GO:0005886/GO:0005515/GO:0007275/GO:0030154/GO:0002376/GO:0005615/GO:0002250/GO:0007399/GO:0005887/GO:0001525/GO:0030215/GO:0038191/GO:0045499/GO:0001755/GO:0030335/GO:0048843/GO:0050919/GO:0071526/GO:0002292/GO:0007409/GO:0008360/GO:0010594/GO:0016525/GO:0045063	/cellular_component/molecular_function/biological_process	Q5TCJ7/Q5TCI6/Q5TCJ5/Q5TCI4/A0A0J9YVY6/
ENSG00000241749	1	-1.18222	1.18222	-0.319944	0.319944	1.72393	1.04245574256116e-16
ENSG00000157020	1	-1.18189	1.18189	-0.32115	0.32115	1.41099	7.01443253801635e-40	ENSG00000157020	SEC13 homolog nuclear pore and COPII coat complex component [Source:HGNC Symbol;Acc:HGNC:10697]	SEC13		GO:0051028/GO:0005634/GO:0016020/GO:0006886/GO:0015031/GO:0016192/GO:0043231/GO:0005654/GO:0005783/GO:0005789/GO:0005765/GO:0030127/GO:0005198/GO:0005515/GO:0031410/GO:0005643/GO:0005764/GO:0042802/GO:0000776/GO:0043547/GO:0000139/GO:0012507/GO:0090114/GO:0005829/GO:0070062/GO:0045893/GO:0005635/GO:1904263/GO:0019886/GO:0048208/GO:0002474/GO:0030433/GO:0090110/GO:0031080/GO:0031081/GO:0032008/GO:…	biological_process/cellular_component/molecular_function/	A8MXL6/C9JIB6//E7ERC8/C9J0S2/C9JBJ5
ENSG00000110888	1	-1.18183	1.18183	0.321377	-0.321377	0.470373	0.000633138	ENSG00000110888	caprin family member 2 [Source:HGNC Symbol;Acc:HGNC:21259]	CAPRIN2		/GO:0005634/GO:0005813/GO:0005829/GO:0045944/GO:0090263/GO:0003723/GO:0005737/GO:0016020/GO:0046872/GO:0005739/GO:0005886/GO:0005515/GO:0030154/GO:0040008/GO:0017148/GO:0033138/GO:0030308/GO:0005102/GO:0050775/GO:0061003/GO:0032092/GO:0043235	/cellular_component/biological_process/molecular_function	/F5H7T6/F5GYA1/H0YGG3/F5H5J8/H0YID4/F5H142/F5GZX3/F5GXI7/H3BM22
ENSG00000180914	1	-1.18169	1.18169	-0.32189	0.32189	0.746389	5.23870365643538e-13	ENSG00000180914	oxytocin receptor [Source:HGNC Symbol;Acc:HGNC:8529]	OXTR		GO:0005622/GO:0016020/GO:0016021/GO:0004930/GO:0007186/GO:0005886/GO:0007165/GO:0005000/GO:0005887/GO:0045907/GO:0004990/GO:0017046/GO:0001967/GO:0001975/GO:0007204/GO:0007507/GO:0007565/GO:0007613/GO:0010701/GO:0014070/GO:0021537/GO:0030431/GO:0032230/GO:0032355/GO:0032570/GO:0034059/GO:0034097/GO:0035176/GO:0042220/GO:0042493/GO:0042711/GO:0042713/GO:0042755/GO:0043434/GO:0044058/GO:0044849/GO:…	cellular_component/molecular_function/biological_process	C9JN09/B2R9L7/C9JQC4	path:hsa04020/path:hsa04024/path:hsa04080/path:hsa04921	hsa:5021	ko:K04229	Calcium signaling pathway - Homo sapiens (human)/cAMP signaling pathway - Homo sapiens (human)/Neuroactive ligand-receptor interaction - Homo sapiens (human)/Oxytocin signaling pathway - Homo sapiens (human)
ENSG00000155265	1	-1.18165	1.18165	0.322035	-0.322035	2.01989	8.20358831165531e-32	ENSG00000155265	golgin A7 family member B [Source:HGNC Symbol;Acc:HGNC:31668]	GOLGA7B		GO:0016020/GO:0005794/GO:0000139/GO:0006612/GO:0018230/GO:0002178/	cellular_component/biological_process/	M0R0R5/
ENSG00000139163	1	-1.1816	1.1816	0.322196	-0.322196	0.633769	1.85288e-06	ENSG00000139163	ethanolamine kinase 1 [Source:HGNC Symbol;Acc:HGNC:24649]	ETNK1		GO:0005737/GO:0016020/GO:0000166/GO:0005524/GO:0005829/GO:0005654/GO:0016740/GO:0016301/GO:0016310/GO:0005886/GO:0006629/GO:0005515/GO:0006646/GO:0008654/GO:0004305/GO:0016021	cellular_component/molecular_function/biological_process	/H0YH69/H0YFP7
ENSG00000081052	1	-1.18158	1.18158	-0.322285	0.322286	1.3007	6.83258416032181e-15	ENSG00000081052	collagen type IV alpha 4 chain [Source:HGNC Symbol;Acc:HGNC:2206]	COL4A4		GO:0005576/GO:0005581/GO:0005201/GO:0005615/GO:0005604/GO:0030198/GO:0031012/GO:0005788/GO:0001525/GO:0032836/GO:0005587/GO:0001886/	cellular_component/molecular_function/biological_process/	A0A2R8Y548/
ENSG00000104055	1	-1.18139	1.18139	-0.322986	0.322986	3.66966	2.26700136668619e-11	ENSG00000104055	transglutaminase 5 [Source:HGNC Symbol;Acc:HGNC:11781]	TGM5		GO:0005737/GO:0046872/GO:0016740/GO:0016746/GO:0005886/GO:0003810/GO:0018149/GO:0006464/GO:0008544/GO:0070268	cellular_component/molecular_function/biological_process	A0A087WZC4//A0A087WVW4/A0A087WVS3
ENSG00000089127	1	-1.18133	1.18133	0.323199	-0.323199	1.95587	0.000112075	ENSG00000089127	2'-5'-oligoadenylate synthetase 1 [Source:HGNC Symbol;Acc:HGNC:8086]	OAS1		GO:0003723/GO:0005634/GO:0005737/GO:0046872/GO:0000166/GO:0005524/GO:0005829/GO:0016740/GO:0005783/GO:0043231/GO:0005739/GO:0005515/GO:0005576/GO:0006955/GO:0016779/GO:0003725/GO:0051607/GO:0002376/GO:0045087/GO:0009615/GO:0045071/GO:0006006/GO:0005654/GO:0060333/GO:0060337/GO:0042593/GO:0001730/GO:0060700/	molecular_function/cellular_component/biological_process/	C6EMZ7/H0YI20/S4R3A5/F8VPW7/F8VXY3/F8VUC8//H0YIB8
ENSG00000106829	1	-1.18102	1.18102	-0.32432	0.32432	1.67014	7.81125632054917e-61	ENSG00000106829	transducin like enhancer of split 4 [Source:HGNC Symbol;Acc:HGNC:11840]	TLE4		GO:0005634/GO:0006355/GO:0016055/GO:0005515/GO:0005654/GO:0003674/GO:0008150/GO:0090090/GO:0003714/GO:0005667/GO:1904837/GO:1990907/GO:0070491/GO:0003682/GO:0003705/GO:0000122/GO:0045892/GO:1990830	cellular_component/biological_process/molecular_function	A0A0A0MT79/H7C4P7/Q5JSY8/H7C4W5/Q5JSY7/Q5JSZ2/F8WAY5/Q5JSZ1/H7C4E4/H0Y5S0//E7EQH3
ENSG00000085662	1	-1.18097	1.18097	-0.324519	0.324519	1.12015	1.62928993099581e-14	ENSG00000085662	aldo-keto reductase family 1 member B [Source:HGNC Symbol;Acc:HGNC:381]	AKR1B1		GO:0005737/GO:0005829/GO:0005654/GO:0016491/GO:0055114/GO:0004032/GO:0001894/GO:0003091/GO:0005996/GO:0006061/GO:0009414/GO:0010033/GO:0018931/GO:0031098/GO:0035809/GO:0042415/GO:0043066/GO:0046427/GO:0048661/GO:0060135/GO:0072001/GO:0072061/GO:0097066/GO:0097238/GO:1901653/GO:0005615/GO:0032838/GO:0033010/GO:0042629/GO:0043220/GO:0048471/GO:0097454/GO:0022900/GO:0070062/GO:0008106/GO:0005975/GO:…	cellular_component/molecular_function/biological_process	A0A024R7A8/E9PCX2/E9PEF9	path:hsa00052/path:hsa00040/path:hsa00790/path:hsa00051/path:hsa01100/path:hsa00561	hsa:231	ko:K00011	Galactose metabolism - Homo sapiens (human)/Pentose and glucuronate interconversions - Homo sapiens (human)/Folate biosynthesis - Homo sapiens (human)/Fructose and mannose metabolism - Homo sapiens (human)/Metabolic pathways - Homo sapiens (human)/Glycerolipid metabolism - Homo sapiens (human)
ENSG00000033170	1	-1.18054	1.18054	-0.326092	0.326092	0.932446	3.218565824192e-15	ENSG00000033170	fucosyltransferase 8 [Source:HGNC Symbol;Acc:HGNC:4019]	FUT8	00513+2.4.1.68/00510+2.4.1.68/00533+2.4.1.68/	GO:0016020/GO:0016021/GO:0005829/GO:0016740/GO:0016757/GO:0005794/GO:0006486/GO:0018279/GO:0032580/GO:0070062/GO:0017124/GO:0000139/GO:0001701/GO:0006487/GO:0006491/GO:0042355/GO:0008424/GO:0046921/GO:0007179/GO:0007229/GO:0007585/GO:0010468/GO:0016477/GO:0033578/GO:0036071/GO:0043112/GO:1900407/GO:0009312/GO:0046368/	cellular_component/molecular_function/biological_process/	Q546E0/G3XAD2//G3V509/G3V4A8/G3V5E3/G3V5Z4/G3V443/G3V530	path:hsa00510/path:hsa01100/path:hsa00533/path:hsa05202/path:hsa00513	hsa:2530	ko:K00717	N-Glycan biosynthesis - Homo sapiens (human)/Metabolic pathways - Homo sapiens (human)/Glycosaminoglycan biosynthesis - keratan sulfate - Homo sapiens (human)/Transcriptional misregulation in cancer - Homo sapiens (human)/Various types of N-glycan biosynthesis - Homo sapiens (human)
ENSG00000134759	1	-1.17987	1.17987	-0.328491	0.328491	0.483697	9.02865e-06	ENSG00000134759	elongator acetyltransferase complex subunit 2 [Source:HGNC Symbol;Acc:HGNC:18248]	ELP2		GO:0000993/GO:0005634/GO:0005737/GO:0005829/GO:0002098/GO:0033588/GO:0006357/GO:0006368/GO:0008023//GO:0019901/GO:0046425	molecular_function/cellular_component/biological_process/	F5GYE9/H0YFW0/K7ER35/F5GWY6/F5GX79/
ENSG00000110911	1	-1.17966	1.17966	0.32926	-0.32926	0.60277	6.93325927477311e-8	ENSG00000110911	solute carrier family 11 member 2 [Source:HGNC Symbol;Acc:HGNC:10908]	SLC11A2		GO:0016020/GO:0016021/GO:0046873/GO:0030001/GO:0048471/GO:0005737/GO:0005634/GO:0005739/GO:0005765/GO:0006811/GO:0005886/GO:0005515/GO:1902600/GO:0031410/GO:0005741/GO:0071421/GO:0035434/GO:0005887/GO:0005507/GO:0005768/GO:0005769/GO:0010008/GO:0055037/GO:0016324/GO:0015295/GO:1903561/GO:0005506/GO:0008270/GO:0045177/GO:0031526/GO:0006879/GO:0055072/GO:0045178/GO:0005773/GO:0030145/GO:0010039/GO:…	cellular_component/molecular_function/biological_process/	A0A2R8YD71/A0A0X8GKR4/F8VR36/A0A2R8YDL2//A0A2R8Y4F9/A0A2R8Y5Q7/F8W1P7/F8W1F2/F8W1D8/F8VWB0/F8W1C0/F8VRL7/A0A2R8Y5L1/H0YIV3/F8W154	path:hsa04142/path:hsa04216/path:hsa04978	hsa:4891	ko:K21398	Lysosome - Homo sapiens (human)/Ferroptosis - Homo sapiens (human)/Mineral absorption - Homo sapiens (human)
ENSG00000149212	1	-1.17939	1.17939	0.330214	-0.330213	1.55949	4.69344e-05	ENSG00000149212	sestrin 3 [Source:HGNC Symbol;Acc:HGNC:23060]	SESN3		GO:0005634/GO:0005737/GO:0016491/GO:0055114/GO:0005515/GO:1901031/GO:1904262/GO:0061700/GO:0042149/GO:0034198/GO:0016684/GO:0070728/GO:0016239/GO:0071230/GO:0071233/GO:1990253/GO:0032868/GO:0038203/GO:0042593/GO:0046626/GO:0051896/GO:0031932	cellular_component/molecular_function/biological_process	/A0A0U1RR17/F5H1K7
ENSG00000154263	1	-1.17915	1.17915	-0.331078	0.331077	1.83608	2.33695289736719e-30	ENSG00000154263	ATP binding cassette subfamily A member 10 [Source:HGNC Symbol;Acc:HGNC:30]	ABCA10		GO:0016021/GO:0055085/GO:0042626/GO:0016020/GO:0000166/GO:0005524/GO:0016887/GO:0043231/GO:0006869	cellular_component/biological_process/molecular_function	K7ERP5/K7EMH5/E5RFP5/E5RFN6//H0YBL8
ENSG00000197594	1	-1.1789	1.1789	-0.331968	0.331969	1.73039	0.00055467	ENSG00000197594	ectonucleotide pyrophosphatase/phosphodiesterase 1 [Source:HGNC Symbol;Acc:HGNC:3356]	ENPP1		GO:0005615/GO:0045599/GO:0032869/GO:0046325/GO:0046627/GO:0003676/GO:0016020/GO:0016021/GO:0046872/GO:0016787/GO:0003824/GO:0005765/GO:0008270/GO:0005886/GO:0005515/GO:0005576/GO:0006955/GO:0004527/GO:0005044/GO:0006898/GO:0005509/GO:0043005/GO:0009986/GO:0005887/GO:0004551/GO:0035529/GO:0030247/GO:0046034/GO:0031214/GO:0046849/GO:0045202/GO:0016323/GO:0043025/GO:0005524/GO:0004528/GO:0042803/GO:…	cellular_component/biological_process/molecular_function/	/E9PE72
ENSG00000156990	1	-1.17853	1.17853	-0.333274	0.333274	1.13448	1.64950457606482e-23	ENSG00000156990	RNA pseudouridylate synthase domain containing 3 [Source:HGNC Symbol;Acc:HGNC:28437]	RPUSD3		GO:0003723/GO:0009982/GO:0001522/GO:0009451/GO:0006397/GO:0016853/GO:0005739/GO:0005515/GO:0005759/GO:0070131/	molecular_function/biological_process/cellular_component/	H7C2C3/H7C1H7/H7C0K9/H7C0R9//H7C0K7/C9JM75/H7C454
ENSG00000169902	1	-1.17846	1.17848	0.333458	-0.333477	0.55858	3.5809e-05	ENSG00000169902	tyrosylprotein sulfotransferase 1 [Source:HGNC Symbol;Acc:HGNC:12020]	TPST1		GO:0016020/GO:0016021/GO:0016740/GO:0005794/GO:0042803/GO:0008476/GO:0006478/GO:0000139/GO:0030173/GO:0006954/GO:0050427	cellular_component/molecular_function/biological_process	C9K0F3/C9J3I4/A0A024RDK9		hsa:8460	ko:K01021
ENSG00000272009	1	-1.17837	1.17837	-0.333825	0.333825	0.903746	0.000390438
ENSG00000131375	1	-1.17832	1.17832	-0.334007	0.334007	0.748393	1.63149033117195e-16	ENSG00000131375	calpain 7 [Source:HGNC Symbol;Acc:HGNC:1484]	CAPN7		/GO:0005634/GO:0016787/GO:0005622/GO:0005515/GO:0008233/GO:0008234/GO:0006508/GO:0004198/GO:0070062/GO:0004175/GO:0010634/GO:0097264/GO:0090541	/cellular_component/molecular_function/biological_process	F8WCZ1/H7C0F1/F8WDQ3//H7C1B7
ENSG00000148730	1	-1.17797	1.17797	-0.335229	0.335229	0.776482	3.34218731097258e-27	ENSG00000148730	eukaryotic translation initiation factor 4E binding protein 2 [Source:HGNC Symbol;Acc:HGNC:3289]	EIF4EBP2		GO:0005622/GO:0003743/GO:0006413/GO:0008190/GO:0030371/GO:0007613/GO:0008286/GO:0019933/GO:0031929/GO:0035176/GO:0045947/GO:0048167/GO:0050804/GO:0098794/GO:0005515/GO:0005737/GO:0006417/GO:0017148/GO:0006412	cellular_component/molecular_function/biological_process	A0A024QZM3	path:hsa04213/path:hsa03013	hsa:1979	ko:K18644	Longevity regulating pathway - multiple species - Homo sapiens (human)/RNA transport - Homo sapiens (human)
ENSG00000100307	1	-1.17782	1.17782	0.335773	-0.335773	0.606809	0.000527188	ENSG00000100307	chromobox 7 [Source:HGNC Symbol;Acc:HGNC:1557]	CBX7		GO:0005634/GO:0005829/GO:0005654/GO:0006325/GO:0000790/GO:0005515/GO:0000122/GO:0031519/GO:0035102	cellular_component/biological_process/molecular_function	B0QYP3/A0A024R1Q2/B0QYP2		hsa:23492	ko:K11454
ENSG00000230590	1	-1.17774	1.17774	0.336051	-0.336051	0.610937	5.62088e-05
ENSG00000131781	1	-1.17628	1.17628	-0.341132	0.341132	0.97314	0.000857079	ENSG00000131781	flavin containing monooxygenase 5 [Source:HGNC Symbol;Acc:HGNC:3773]	FMO5	/00982+1.14.13.8	GO:0004497/GO:0004499/GO:0016491/GO:0050660/GO:0050661/GO:0055114/GO:0016020/GO:0016021/GO:0005783/GO:0005829/GO:0005789/GO:0031090/GO:0043231/GO:0008150	molecular_function/biological_process/cellular_component	E9PP51/E9PJF3/A0A024QYY6//E9PQ84	path:hsa00982	hsa:2330	ko:K00485	Drug metabolism - cytochrome P450 - Homo sapiens (human)
ENSG00000111530	1	-1.17614	1.17616	-0.341588	0.34157	0.652719	7.26593062705107e-9	ENSG00000111530	cullin associated and neddylation dissociated 1 [Source:HGNC Symbol;Acc:HGNC:30688]	CAND1		GO:0005634/GO:0005737/GO:0016020/GO:0005794/GO:0005829/GO:0005654/GO:0016567/GO:0005515/GO:0030154/GO:0005576/GO:0070062/GO:0043687/GO:0043312/GO:0034774/GO:1904813/GO:0000151/GO:0043086/GO:0010265/GO:0006879/GO:0031461/GO:0017025/GO:0045893/GO:0045899/	cellular_component/biological_process/molecular_function/	H0YH27//F5H6I6/A0A0C4DGH5
ENSG00000196787	1	-1.17611	1.17611	-0.341723	0.341724	1.26603	9.2065e-05	ENSG00000196787	histone cluster 1 H2A family member g [Source:HGNC Symbol;Acc:HGNC:4737]	HIST1H2AG		GO:0005634/GO:0003677/GO:0046982/GO:0000786/GO:0005694/GO:0005515/GO:0006325/GO:0000790/GO:0070062/GO:0008150/GO:0019899	cellular_component/molecular_function/biological_process
ENSG00000137142	1	-1.17553	1.17553	-0.343704	0.343704	1.30916	6.15353471095819e-7	ENSG00000137142	insulin like growth factor binding protein like 1 [Source:HGNC Symbol;Acc:HGNC:20081]	IGFBPL1		GO:0005576/GO:0005520/GO:0001558/GO:0005615/GO:0003674/GO:0071228	cellular_component/molecular_function/biological_process
ENSG00000186197	1	-1.17532	1.17532	-0.344416	0.344417	2.09194	1.06707631906519e-47	ENSG00000186197	EDAR associated death domain [Source:HGNC Symbol;Acc:HGNC:14341]	EDARADD		GO:0007165//GO:0005737/GO:0005515/GO:0007275/GO:0030154/GO:0005829/GO:0033209	biological_process//cellular_component/molecular_function	B1AL55/A0A2R8Y5E0/A0A1B0GV26/
ENSG00000142166	1	-1.1746	1.1746	-0.346878	0.346878	0.417669	5.30098358376731e-11	ENSG00000142166	interferon alpha and beta receptor subunit 1 [Source:HGNC Symbol;Acc:HGNC:5432]	IFNAR1		GO:0016020/GO:0016021/GO:0005886/GO:0005515/GO:0005764/GO:0019221/GO:0005887/GO:0005768/GO:0032496/GO:0005770/GO:0009615/GO:0007259/GO:0060337/GO:0035457/GO:0004904/GO:0004905/GO:0019962/	cellular_component/molecular_function/biological_process/	C9J114/
ENSG00000137285	1	-1.17459	1.17459	-0.346904	0.346904	0.876846	7.21534e-05	ENSG00000137285	tubulin beta 2B class IIb [Source:HGNC Symbol;Acc:HGNC:30829]	TUBB2B		GO:0005634/GO:0005737/GO:0000166/GO:0003924/GO:0005525/GO:0005856/GO:0005515/GO:0005200/GO:0005874/GO:0007017/GO:0007399/GO:0000226/GO:0000278/GO:0015630/GO:0046982/GO:0001764/GO:1902669	cellular_component/molecular_function/biological_process
ENSG00000139323	1	-1.17458	1.17458	-0.346942	0.346942	0.64458	4.47754474414615e-7	ENSG00000139323	POC1 centriolar protein B [Source:HGNC Symbol;Acc:HGNC:30836]	POC1B		/GO:0005737/GO:0005856/GO:0042995/GO:0005515/GO:0000922/GO:0005813/GO:0036064/GO:0060271/GO:0030030/GO:0005814/GO:0001895/GO:0008283	/cellular_component/molecular_function/biological_process	F8VV91/F8VPF1//Q8IU52/F8VX21/A0MNP0		hsa:282809	ko:K16482
ENSG00000151150	1	-1.17431	1.17431	-0.34786	0.347861	2.05004	9.83384753115812e-54	ENSG00000151150	ankyrin 3 [Source:HGNC Symbol;Acc:HGNC:494]	ANK3		GO:0010628/GO:0005737/GO:0016020/GO:0007165/GO:0005794/GO:0005886/GO:0005856/GO:0042995/GO:0005515/GO:0030054/GO:0045202/GO:0045211/GO:0005764/GO:0030424/GO:0005829/GO:0045296/GO:0042383/GO:0016323/GO:0044325/GO:0009986/GO:0005783/GO:0006888/GO:0007528/GO:0016328/GO:0034112/GO:0016529/GO:0030018/GO:0030674/GO:0033268/GO:0043194/GO:0045184/GO:0072659/GO:0030315/GO:0030425/GO:0014704/GO:0007016/GO:…	biological_process/cellular_component/molecular_function/	D6RFK6/A0A087WTP5/A0A087WY90/A0A087WX55/H0Y3A4/A0A087WTF3/H0YA66/A0A087WTE8/A0A087X0L3/A0A087X0B4/D6RF31/A0A087WWI5/B1AQT1/A0A087WZ65/H0Y951/D6RHY3//D6RBY7/H0Y9E9/H0YAH5/H0Y8Z4/A0A087WVC2/A0A087WZ26
ENSG00000148346	1	-1.17429	1.17429	0.347913	-0.347913	2.34889	6.02162144465422e-25	ENSG00000148346	lipocalin 2 [Source:HGNC Symbol;Acc:HGNC:6526]	LCN2		GO:0006811/GO:0005576/GO:0006915/GO:0005615/GO:0036094/GO:0002376/GO:0045087/GO:0005506/GO:0070062/GO:0043312/GO:0019221/GO:0035580/GO:0120162/GO:0019730/GO:0006879/GO:0055072/GO:0002020/GO:0042803/GO:0006979/GO:0009615/GO:0009617/GO:0009635/GO:0010046/GO:0010628/GO:0015891/GO:0031346/GO:0031667/GO:0031669/GO:0042493/GO:0070207/GO:0070301/GO:0071222/GO:0071347/GO:0071356/GO:0097192/GO:0005829	biological_process/cellular_component/molecular_function	X6R8F3/
ENSG00000124615	1	-1.1742	1.1742	-0.348215	0.348215	1.3561	3.5906e-06	ENSG00000124615	molybdenum cofactor synthesis 1 [Source:HGNC Symbol;Acc:HGNC:7190]	MOCS1	/00790+4.1.99.22/00790+4.6.1.17	GO:0005634/GO:0046872/GO:0000166/GO:0003824/GO:0016829/GO:0005525/GO:0006777/GO:0019008/GO:0051536/GO:0051539/GO:0005829/GO:0061798/GO:0061799/GO:0032324	cellular_component/molecular_function/biological_process	/A0A024RD17/F8WCK1	path:hsa01100/path:hsa00790	hsa:4337	ko:K20967	Metabolic pathways - Homo sapiens (human)/Folate biosynthesis - Homo sapiens (human)
ENSG00000167550	1	-1.17415	1.17415	-0.348379	0.348381	0.617981	0.000483603	ENSG00000167550	RHEB like 1 [Source:HGNC Symbol;Acc:HGNC:21166]	RHEBL1		GO:0005737/GO:0016020/GO:0046872/GO:0000166/GO:0007165/GO:0003924/GO:0005525/GO:0005515/GO:0012505/GO:0051092/GO:0031929	cellular_component/molecular_function/biological_process	C9JQQ1/F8W1T5/
ENSG00000101972	1	-1.17361	1.17361	0.350193	-0.350193	0.619953	1.62418559713022e-10	ENSG00000101972	stromal antigen 2 [Source:HGNC Symbol;Acc:HGNC:11355]	STAG2		/GO:0005634/GO:0016020/GO:0051301/GO:0005694/GO:0005515/GO:0007049/GO:0051321/GO:0007059/GO:0000775/GO:0005654/GO:0005829/GO:0000785/GO:0016363/GO:0097431/GO:1901673/GO:0008278/GO:0007062/GO:0032876	/cellular_component/biological_process/molecular_function	B1AMT4/B1AMT1/B1AMS9//B1AMT3/B1AMT0/B1AMT2/E7ERE6/B1AMS8
ENSG00000206538	1	-1.17351	1.17351	0.350536	-0.350536	0.888997	2.27024512978697e-14	ENSG00000206538	vestigial like family member 3 [Source:HGNC Symbol;Acc:HGNC:24327]	VGLL3		/GO:0005634/GO:0006355	/cellular_component/biological_process	/A0A1B0GTF5/H7C571
ENSG00000204618	1	-1.17347	1.17347	0.350672	-0.350672	1.27812	5.74369e-06	ENSG00000204618	ring finger protein 39 [Source:HGNC Symbol;Acc:HGNC:18064]	RNF39		GO:0005737/GO:0046872/GO:0008150/GO:0005575	cellular_component/molecular_function/biological_process	Q96QB5/A0A1U9X8G2		hsa:80352
ENSG00000182158	1	-1.17339	1.17339	-0.350945	0.350945	0.696525	6.35945787796077e-9	ENSG00000182158	cAMP responsive element binding protein 3 like 2 [Source:HGNC Symbol;Acc:HGNC:23720]	CREB3L2		GO:0005634/GO:0016020/GO:0016021/GO:0005783/GO:0005654/GO:0005789/GO:0006355/GO:0006366/GO:0003677/GO:0003700/GO:0007275/GO:0045944/GO:0051216/GO:0045893/GO:0035497/GO:0030968/GO:0000981/GO:0006986/GO:0044212/GO:0034976/GO:0002062/GO:0000978/GO:0001077/GO:0001228/GO:0006888/GO:0009611/GO:0010628/GO:0010976/GO:0000785/GO:0097038	cellular_component/biological_process/molecular_function	H7C1W8/A0A087WUP1/A0A087WU77//C9JPH0
ENSG00000143772	1	-1.17322	1.17322	-0.35151	0.35151	0.328969	0.000233375	ENSG00000143772	inositol-trisphosphate 3-kinase B [Source:HGNC Symbol;Acc:HGNC:6179]	ITPKB		GO:0000166/GO:0005524/GO:0016740/GO:0016301/GO:0016310/GO:0032958/GO:0005515/GO:0005516/GO:0005829/GO:0007165/GO:0043647/GO:0071277/GO:0008440/GO:0032957/GO:0000165/GO:0001932/GO:0002262/GO:0007166/GO:0030217/GO:0033030/GO:0035726/GO:0045059/GO:0045061/GO:0045638/GO:0046579/GO:0046638/GO:0005634/GO:0016020	molecular_function/biological_process/cellular_component
ENSG00000133704	1	-1.17304	1.17304	-0.352116	0.352116	0.425905	2.75780725649139e-7	ENSG00000133704	importin 8 [Source:HGNC Symbol;Acc:HGNC:9853]	IPO8		GO:0005634/GO:0005737/GO:0006886/GO:0015031/GO:0005515/GO:0008536/GO:0005829/GO:0005654/GO:0005635/GO:0006606/GO:0007165/GO:0008565/GO:0060964//GO:0005622	cellular_component/biological_process/molecular_function/	F5H815/A0A087WXH2/F5H009//F5GXT5/H0YH64/F5H244/F5H292/F5H2I3
ENSG00000156453	1	-1.17299	1.17299	-0.352283	0.352283	0.422265	0.000298063	ENSG00000156453	protocadherin 1 [Source:HGNC Symbol;Acc:HGNC:8655]	PCDH1		GO:0016020/GO:0016021/GO:0043231/GO:0005634/GO:0005730/GO:0005509/GO:0007155/GO:0007156/GO:0005886/GO:0030054/GO:0005887/GO:0007399/GO:0007267/GO:0005911/	cellular_component/molecular_function/biological_process/	/H0Y9F5/H0Y9I5/D6RBG2/D6RAX3
ENSG00000198918	1	-1.17299	1.17299	-0.352286	0.352286	0.336652	3.48775e-05	ENSG00000198918	ribosomal protein L39 [Source:HGNC Symbol;Acc:HGNC:10350]	RPL39		GO:0003723/GO:0006412/GO:0002181/GO:0005622/GO:0003735/GO:0005840/GO:0005615/GO:0022625/GO:0005829/GO:0006413/GO:0000184/GO:0050830/GO:0061844/GO:0019731/GO:0002227/GO:0006614/GO:0042788	molecular_function/biological_process/cellular_component
ENSG00000165507	1	-1.17287	1.17287	-0.352678	0.352678	0.957442	6.76414429366239e-18	ENSG00000165507	DEPP1 autophagy regulator [Source:HGNC Symbol;Acc:HGNC:23355]	DEPP1		GO:0005737/GO:0005739/GO:0006914/GO:0005777/GO:0010506/	cellular_component/biological_process/	/X6RKE0
ENSG00000163694	1	-1.17284	1.17284	0.352778	-0.352778	0.343948	0.000352144	ENSG00000163694	RNA binding motif protein 47 [Source:HGNC Symbol;Acc:HGNC:30358]	RBM47		GO:0003676/GO:0003723/GO:0005634/GO:0002244/GO:0016554	molecular_function/cellular_component/biological_process	D6R9M7//D6RA49/D6R9D6/D6RCT1/D6RFL5/D6RBP6/D6RBS9/D6REZ6/B7Z8Z7
ENSG00000135124	1	-1.17276	1.17276	-0.353051	0.353051	0.558612	1.77492e-05	ENSG00000135124	purinergic receptor P2X 4 [Source:HGNC Symbol;Acc:HGNC:8535]	P2RX4		GO:0048471/GO:0010614/GO:0016020/GO:0016021/GO:0005524/GO:0005216/GO:0006811/GO:0005887/GO:0005765/GO:0005886/GO:0005515/GO:0098655/GO:0001614/GO:0004931/GO:0033198/GO:0060079/GO:0045296/GO:0070062/GO:0034220/GO:0042803/GO:0044297/GO:0005102/GO:0007596/GO:0055117/GO:0032308/GO:0035381/GO:0006812/GO:0005639/GO:0030054/GO:0045429/GO:0007165/GO:0051897/GO:0008217/GO:0071318/GO:0051928/GO:0008270/GO:…	cellular_component/biological_process/molecular_function	F5H1M6/F5H2S3//F5GZQ9/F6SFZ6/H0YF70
ENSG00000127334	1	-1.17251	1.17249	-0.353886	0.353901	0.66193	1.24337748805026e-7	ENSG00000127334	dual specificity tyrosine phosphorylation regulated kinase 2 [Source:HGNC Symbol;Acc:HGNC:3093]	DYRK2		/GO:0005634/GO:0005737/GO:0000166/GO:0004672/GO:0004674/GO:0005524/GO:0006468/GO:0005829/GO:0005654/GO:0016740/GO:0016301/GO:0016310/GO:0004713/GO:0018108/GO:0005515/GO:0006974/GO:0006915/GO:0000287/GO:0007224/GO:1901796/GO:0000151/GO:0004712/GO:0042771/GO:0030145/GO:0045725/GO:0070885/GO:1990904/GO:0016020/GO:0016021	/cellular_component/molecular_function/biological_process	A0A0A0MR56/F5H5L5/F5GXG1/
ENSG00000122870	1	-1.17229	1.17229	0.354587	-0.354587	2.42602	4.56442343757748e-93	ENSG00000122870	BicC family RNA binding protein 1 [Source:HGNC Symbol;Acc:HGNC:19351]	BICC1		GO:0003676/GO:0003723/GO:0005737/GO:0007275/GO:0090090/GO:0007368/GO:0007507/	molecular_function/cellular_component/biological_process/	A6NGY7/
ENSG00000162645	1	-1.17173	1.17174	-0.356417	0.35641	1.51333	2.49740811201124e-15	ENSG00000162645	guanylate binding protein 2 [Source:HGNC Symbol;Acc:HGNC:4183]	GBP2		GO:0005634/GO:0005737/GO:0016020/GO:0000166/GO:0005829/GO:0005654/GO:0016787/GO:0003924/GO:0005525/GO:0005794/GO:0042803/GO:0015629/GO:0005515/GO:0000139/GO:0048471/GO:0071346/GO:0071347/GO:0071356/GO:0006955/GO:0060333/GO:0034504/GO:0060337	cellular_component/molecular_function/biological_process
ENSG00000144802	1	-1.17146	1.17147	0.357299	-0.357308	1.38001	2.25676783616576e-16	ENSG00000144802	NFKB inhibitor zeta [Source:HGNC Symbol;Acc:HGNC:29805]	NFKBIZ		/GO:0016607/GO:0036464/GO:0005634/GO:0005515/GO:0050852/GO:0050729/GO:2000321/GO:0006954	/cellular_component/molecular_function/biological_process	C9J5I7/C9J5G8/C9JZ23/H7C5S1/
ENSG00000257515	1	-1.17078	1.17078	-0.359531	0.359531	2.43639	2.20147e-05
ENSG00000171155	1	-1.17067	1.17067	0.359917	-0.359917	0.469815	0.000608188	ENSG00000171155	C1GALT1 specific chaperone 1 [Source:HGNC Symbol;Acc:HGNC:24338]	C1GALT1C1		GO:0016020/GO:0016021/GO:0005515/GO:0070062/GO:0000139/GO:0016263/GO:0016267/GO:0006493/GO:0030168/GO:0036344	cellular_component/molecular_function/biological_process
ENSG00000185875	1	-1.17066	1.17066	-0.359947	0.359949	0.555998	0.000189245	ENSG00000185875	threonine synthase like 1 [Source:HGNC Symbol;Acc:HGNC:26160]	THNSL1	00400+2.7.1.71	GO:0003674/GO:0008150/GO:0005575	molecular_function/biological_process/cellular_component
ENSG00000214021	1	-1.17046	1.17046	0.360571	-0.360571	1.32336	3.5382442020606e-8	ENSG00000214021	tubulin tyrosine ligase like 3 [Source:HGNC Symbol;Acc:HGNC:24483]	TTLL3		GO:0070735/GO:0018094/GO:0006464//GO:0005737/GO:0000166/GO:0005524/GO:0005856/GO:0042995/GO:0016874/GO:0005874/GO:0005929/GO:0060271/GO:0005829/GO:0015630/GO:0005930/GO:0070736/GO:0035082	molecular_function/biological_process//cellular_component	C9JQ30/H7C0T5/H0Y5E3/F8WBP6/C9JW59/C9JKU2/E5RGZ6/H3BLT7/C9JRM2/R4GMR7/H7C197/F8WD18/C9JZ73//C9JUK0/C9IZU0/C9JNK2/R4GMW2/R4GN12/J3KQB2/C9JWZ9/C9JNK7/C9JSD3		hsa:26140	ko:K16608
ENSG00000197324	1	-1.17027	1.17027	-0.361196	0.361196	0.466054	2.86259e-05	ENSG00000197324	LDL receptor related protein 10 [Source:HGNC Symbol;Acc:HGNC:14553]	LRP10		GO:0016020/GO:0016021/GO:0006898/GO:0005905/GO:0006897/GO:0005041/GO:0006629/GO:0006869/GO:0048839	cellular_component/biological_process/molecular_function	H0YHW7/
ENSG00000135452	1	-1.17019	1.17022	-0.361423	0.3614	0.693332	2.36353985937393e-8	ENSG00000135452	tetraspanin 31 [Source:HGNC Symbol;Acc:HGNC:10539]	TSPAN31		GO:0016020/GO:0016021/GO:0007166/GO:0005887/GO:0008284/	cellular_component/biological_process/	F8VP43/F8VWE0//F8VVF8/F8VNT7/F8VS78/F8VW54
ENSG00000076770	1	-1.1701	1.1701	0.361767	-0.361767	0.522056	2.26738e-05	ENSG00000076770	muscleblind like splicing regulator 3 [Source:HGNC Symbol;Acc:HGNC:20564]	MBNL3		GO:0046872/GO:0003723/GO:0006397/GO:0008380/GO:0005634/GO:0005737/GO:0005515/GO:0007275/GO:0006357/GO:0000981/GO:0000381/GO:0043484/GO:0005654/GO:0045662	molecular_function/biological_process/cellular_component	B1AKI5/B1AKI6/B1AKI2//B1AKI4
ENSG00000140943	1	-1.1698	1.1698	-0.362708	0.362708	0.406462	4.69877043722115e-8	ENSG00000140943	membrane bound transcription factor peptidase site 1 [Source:HGNC Symbol;Acc:HGNC:15456]	MBTPS1		GO:0016020/GO:0016021/GO:0005783/GO:0005789/GO:0016787/GO:0005794/GO:0006629/GO:0008202/GO:0008233/GO:0006508/GO:0004252/GO:0000139/GO:0008236/GO:0008203/GO:0044267/GO:0043687/GO:0004222/GO:0005788/GO:0045540/GO:0007040/GO:0030968/GO:0031293/GO:0034976/GO:0036500/GO:0004175/GO:0006606/GO:0005795/	cellular_component/molecular_function/biological_process/	H3BV53/H3BS61/A0A087WXJ6//H3BU75
ENSG00000163739	1	-1.16978	1.16977	-0.362806	0.362815	1.32505	0.000460797	ENSG00000163739	C-X-C motif chemokine ligand 1 [Source:HGNC Symbol;Acc:HGNC:4602]	CXCL1		GO:0008083/GO:0010469/GO:0005576/GO:0043085/GO:0006955/GO:0006935/GO:0005125/GO:0006954/GO:0005615/GO:0008009/GO:0006952/GO:0071222/GO:0030593/GO:0070098/GO:0007186/GO:0043312/GO:0007399/GO:0007165/GO:0005102/GO:0019221/GO:0035580/GO:1904724/GO:0008283/GO:0008285/GO:0030595/GO:0061844/GO:0035556/GO:0030036/GO:0008047	molecular_function/biological_process/cellular_component
ENSG00000154122	1	-1.16972	1.16972	-0.362988	0.362988	0.746723	3.05422958735016e-12	ENSG00000154122	ANKH inorganic pyrophosphate transport regulator [Source:HGNC Symbol;Acc:HGNC:15492]	ANKH		GO:0016020/GO:0016021/GO:0005886/GO:0005887/GO:0015114/GO:0035435/GO:0001501/GO:0030500/GO:0006817/GO:0055085/GO:0007626/GO:0019867/GO:0005315/GO:0030504/GO:0030505	cellular_component/molecular_function/biological_process	D6RGI5/A0A2R8Y5E7/
ENSG00000260597	1	-1.16972	1.16972	-0.362992	0.362992	1.16887	0.000103212
ENSG00000211455	1	-1.16965	1.16962	0.363277	-0.363251	0.392492	0.000459578	ENSG00000211455	serine/threonine kinase 38 like [Source:HGNC Symbol;Acc:HGNC:17848]	STK38L		GO:0004672/GO:0005524/GO:0006468/GO:0005829/GO:0005737/GO:0016020/GO:0046872/GO:0000166/GO:0004674/GO:0016740/GO:0016301/GO:0016310/GO:0003779/GO:0005856/GO:0005515/GO:0000287/GO:0035556/GO:0018105/GO:0015629/GO:0051128/	molecular_function/biological_process/cellular_component/	F5H5E6//F5H277/H0YGN4/F5H0V1/I3L0D0/F5H7Z3/F5GY51
ENSG00000224939	1	-1.16964	1.16964	-0.363223	0.363223	1.65425	5.42023e-06
ENSG00000164117	1	-1.16947	1.16944	-0.363806	0.363838	0.432186	7.98934e-05	ENSG00000164117	F-box protein 8 [Source:HGNC Symbol;Acc:HGNC:13587]	FBXO8		GO:0006511/GO:0005086/GO:0032012/GO:0005085/GO:0000151/	biological_process/molecular_function/cellular_component/	D6RIC0//D6RJ92/A0A0S2Z5D1		hsa:26269	ko:K10294
ENSG00000182149	1	-1.16922	1.16922	-0.364574	0.364574	0.420014	8.95456875908166e-10	ENSG00000182149	IST1 ESCRT-III associated factor [Source:HGNC Symbol;Acc:HGNC:28977]	IST1		GO:0015031/GO:0043231/GO:0005634/GO:0005737/GO:0051301/GO:0005829/GO:0005856/GO:0005515/GO:0007049/GO:0031410/GO:0005813/GO:0005815/GO:0030496/GO:0005576/GO:0045296/GO:0044877/GO:0070062/GO:0036258/GO:0043312/GO:0019904/GO:0008104/GO:0035578/GO:0005635/GO:0005793/GO:0045862/GO:0000785/GO:0045184/GO:1904903/GO:0019076/GO:0090543/GO:0061640/GO:0090541/GO:0009838/GO:0046745//GO:0048672	biological_process/cellular_component/molecular_function/	/J3QQP8/H3BQ38/H3BPP6/H3BQF7/H3BRE2/H3BUI0/F5GXM3/H3BMU1/E9PF00/J3KR23
ENSG00000185432	1	-1.16895	1.16895	-0.365449	0.365449	2.07128	1.20049787806614e-8	ENSG00000185432	methyltransferase like 7A [Source:HGNC Symbol;Acc:HGNC:24550]	METTL7A		GO:0016020/GO:0016021/GO:0008168/GO:0016740/GO:0032259/GO:0005783/GO:0005811/GO:0005576/GO:0043312/GO:1904724	cellular_component/molecular_function/biological_process	A0A024R118/F8VQX6/H0YI09		hsa:25840
ENSG00000159335	1	-1.16893	1.16893	-0.36553	0.36553	0.82056	1.70788612990888e-9	ENSG00000159335	parathymosin [Source:HGNC Symbol;Acc:HGNC:9629]	PTMS		/GO:0002376/GO:0005634/GO:0006260	/biological_process/cellular_component	/F5H7R9/F5GXR3
ENSG00000085871	1	-1.16883	1.16883	-0.365826	0.365826	0.637183	6.34787182461128e-9	ENSG00000085871	microsomal glutathione S-transferase 2 [Source:HGNC Symbol;Acc:HGNC:7063]	MGST2		GO:0050729/GO:0016020/GO:0016021/GO:0016740/GO:0005783/GO:0005789/GO:0031090/GO:0043231/GO:0005886/GO:0008047/GO:0043085/GO:0005515/GO:0098869/GO:0006691/GO:0004364/GO:0019370/GO:0006750/GO:0005635/GO:0006805/GO:0004464/GO:0004602/GO:0006629/GO:1901687/GO:0046466/GO:0010243/GO:0032496/GO:0005737	biological_process/cellular_component/molecular_function
ENSG00000142192	1	-1.16875	1.16875	-0.366089	0.366089	0.574804	9.63074356196798e-8	ENSG00000142192	amyloid beta precursor protein [Source:HGNC Symbol;Acc:HGNC:620]	APP		GO:0001934/GO:0005737/GO:0016020/GO:0016021/GO:0046872/GO:0003677/GO:0007155/GO:0005794/GO:0004867/GO:0010951/GO:0005886/GO:0005515/GO:0007399/GO:0006915/GO:0048471/GO:0005615/GO:0005905/GO:0009986/GO:0008201/GO:0005576/GO:0030414/GO:0010466/GO:0042802/GO:0046914/GO:0007219/GO:0016504/GO:0070851/GO:0001967/GO:0006378/GO:0006417/GO:0006468/GO:0006878/GO:0006897/GO:0006979/GO:0007176/GO:0007409/GO:…	biological_process/cellular_component/molecular_function	A0A0A0MRG2/H7C2L2/A0A140VJC8//H7C0V9/E9PG40	path:hsa04726/path:hsa05010	hsa:351	ko:K04520	Serotonergic synapse - Homo sapiens (human)/Alzheimer disease - Homo sapiens (human)
ENSG00000058335	1	-1.16868	1.1687	-0.366305	0.366286	0.57553	6.75688e-05	ENSG00000058335	Ras protein specific guanine nucleotide releasing factor 1 [Source:HGNC Symbol;Acc:HGNC:9875]	RASGRF1		GO:0035556/GO:0007264/GO:0005886/GO:0005085/GO:0005089/GO:0035023/GO:0046578/GO:0007616/GO:0043005/GO:0005829/GO:0007165/GO:0005088/GO:0000165/GO:0048167/GO:0034976/GO:0046579/GO:0043547/GO:0030426/GO:0031175/GO:0035020/GO:0090630/GO:0035254/GO:0008283/GO:0048168/GO:2000310	biological_process/cellular_component/molecular_function
ENSG00000115825	1	-1.16862	1.16862	-0.366504	0.366504	0.637626	5.55533096847868e-10	ENSG00000115825	protein kinase D3 [Source:HGNC Symbol;Acc:HGNC:9408]	PRKD3	04070+2.7.11.13	GO:0005737/GO:0016020/GO:0046872/GO:0000166/GO:0004672/GO:0004674/GO:0005524/GO:0006468/GO:0005829/GO:0005654/GO:0016740/GO:0016301/GO:0016310/GO:0035556/GO:0005515/GO:0004697/GO:0030148/GO:0007205/GO:0089700/GO:0005622	cellular_component/molecular_function/biological_process	H7C172/H0Y5M6/C9JKP8/
ENSG00000139291	1	-1.16825	1.16825	-0.367692	0.367692	0.70545	1.18381415899544e-9	ENSG00000139291	transmembrane protein 19 [Source:HGNC Symbol;Acc:HGNC:25605]	TMEM19		GO:0016020/GO:0016021/GO:0005515	cellular_component/molecular_function	A0A024RBA1/A0A024RBE1/H0YHY1/F8VS20/H0YIS8/F8VRE8		hsa:55266
ENSG00000146830	1	-1.16755	1.16755	-0.369913	0.369913	0.407968	2.097e-06	ENSG00000146830	GRB10 interacting GYF protein 1 [Source:HGNC Symbol;Acc:HGNC:9126]	GIGYF1		GO:0005515/GO:0008150/GO:0032991/GO:0048009	molecular_function/biological_process/cellular_component
ENSG00000168216	1	-1.16735	1.16735	0.370533	-0.370533	1.08862	2.37920385456108e-14	ENSG00000168216	LMBR1 domain containing 1 [Source:HGNC Symbol;Acc:HGNC:23038]	LMBRD1		GO:0016020/GO:0016021/GO:0005765/GO:0005764/GO:0016032/GO:0031419/GO:0009235/GO:0015420/GO:0015889/GO:0005158/GO:0005886/GO:0045334/	cellular_component/biological_process/molecular_function/
ENSG00000272325	1	-1.16721	1.16721	0.370975	-0.370975	0.387164	7.63402e-05	ENSG00000272325	nudix hydrolase 3 [Source:HGNC Symbol;Acc:HGNC:8050]	NUDT3		GO:0005737/GO:0046872/GO:0005829/GO:0016787/GO:0000287/GO:0008486/GO:0052840/GO:0052841/GO:0052842/GO:0052843/GO:0052844/GO:0052845/GO:0052846/GO:0052847/GO:0052848/GO:0005634/GO:0007267/GO:0043647/GO:0000298/GO:0034431/GO:0034432/GO:0050072/GO:0015961/GO:0071543/GO:0071544/GO:1901907/GO:1901909/GO:1901911	cellular_component/molecular_function/biological_process
ENSG00000256542	1	-1.16713	1.16713	-0.371234	0.371234	2.3149	9.55115308476289e-13
ENSG00000166780	1	-1.16644	1.16644	0.373401	-0.3734	1.853	2.52550607469138e-11	ENSG00000166780	chromosome 16 open reading frame 45 [Source:HGNC Symbol;Acc:HGNC:19213]	C16orf45		GO:0007026/GO:0021822/GO:0015630/GO:0005515/	biological_process/cellular_component/molecular_function/	H3BTT5//H3BP34/H3BUY6/H3BRF6/H3BR56/A0A024QZI8/H3BU79		hsa:89927
ENSG00000104774	1	-1.16638	1.16631	0.373722	-0.373655	0.298643	0.000866362	ENSG00000104774	mannosidase alpha class 2B member 1 [Source:HGNC Symbol;Acc:HGNC:6826]	MAN2B1		GO:0046872/GO:0030246/GO:0016787/GO:0003824/GO:0005975/GO:0016798/GO:0008152/GO:0005615/GO:0005764/GO:0005576/GO:0004559/GO:0006013/GO:0070062/GO:0043312/GO:0006517/GO:0005774/GO:0006464/GO:0009313/GO:0043202/GO:0035578/	molecular_function/biological_process/cellular_component/	M0QXY0//M0R174/M0QYZ1/M0QZG6
ENSG00000184564	1	-1.16627	1.16627	-0.373904	0.373905	2.69087	4.02746955372111e-30	ENSG00000184564	SLIT and NTRK like family member 6 [Source:HGNC Symbol;Acc:HGNC:23503]	SLITRK6		/GO:0016020/GO:0016021/GO:0005886/GO:0050896/GO:0005887/GO:0007601/GO:0007605/GO:0007409/GO:0009986/GO:0001964/GO:0002088/GO:0002093/GO:0007416/GO:0008344/GO:0021562/GO:0031223/GO:0035264/GO:0042472/GO:0043010/GO:0048812/GO:0051965/GO:0060005/GO:0060007/GO:0060384/GO:0090102/GO:0071944	/cellular_component/biological_process
ENSG00000171488	1	-1.16627	1.16629	-0.373894	0.373876	0.669236	0.00026658	ENSG00000171488	leucine rich repeat containing 8 VRAC subunit C [Source:HGNC Symbol;Acc:HGNC:25075]	LRRC8C		GO:0005737/GO:0016020/GO:0016021/GO:0005783/GO:0005789/GO:0015698/GO:0098656/GO:0006811/GO:0005886/GO:0005515/GO:0005225/GO:0006884/GO:0034702/GO:0005887/GO:0034214/GO:0055085/GO:0015734/GO:0015810/GO:0045444/GO:0071470/GO:0005623	cellular_component/biological_process/molecular_function	E9PHY6/
ENSG00000109452	1	-1.16567	1.16568	-0.37578	0.375762	0.61155	2.11815889442943e-8	ENSG00000109452	inositol polyphosphate-4-phosphatase type II B [Source:HGNC Symbol;Acc:HGNC:6075]	INPP4B	04070+3.1.3.66/00562+3.1.3.66/	GO:0016787/GO:0016311/GO:0036092/GO:0005737/GO:0005829/GO:0016316/GO:0005515/GO:0007165/GO:0006661/GO:0043647/GO:0017161/GO:0034597/GO:0052828/GO:0016020/GO:0016021/	molecular_function/biological_process/cellular_component/	Q9BS68//D6RE59/H0Y9Q3/D6RDJ7/E9PG59/D6RJC3/E7EQN9/D6R9J5/E9PCZ3/H0YA10/E9PHC0
ENSG00000243244	1	-1.16563	1.16563	-0.375913	0.375913	1.89424	9.89216531381004e-8	ENSG00000243244	stonin 1 [Source:HGNC Symbol;Acc:HGNC:17003]	STON1		/GO:0005737/GO:0016020/GO:0006897/GO:0030100	/cellular_component/biological_process	H7C1E2/
ENSG00000187689	1	-1.16552	1.16552	-0.37625	0.37625	1.39465	2.21115e-05	ENSG00000187689	amelotin [Source:HGNC Symbol;Acc:HGNC:33188]	AMTN		GO:0007155/GO:0005515/GO:0005576/GO:0042475/GO:0031214/GO:0044267/GO:0043687/GO:0031012/GO:0005911/GO:0070175/GO:0005604/GO:0005788/GO:0003674/GO:0070169	biological_process/molecular_function/cellular_component	F1T0L8/		hsa:401138
ENSG00000109572	1	-1.16527	1.16527	-0.377029	0.377029	0.636593	1.03775e-06	ENSG00000109572	chloride voltage-gated channel 3 [Source:HGNC Symbol;Acc:HGNC:2021]	CLCN3		GO:0016020/GO:1902476/GO:0006821/GO:0005247/GO:0016021/GO:0055085/GO:0000166/GO:0005524/GO:0005794/GO:0042803/GO:0006811/GO:0015297/GO:0000139/GO:0031410/GO:0005254/GO:0009986/GO:0009897/GO:0005768/GO:0005887/GO:0005886/GO:0005515/GO:0031902/GO:0005769/GO:0031901/GO:0030141/GO:0005770/GO:0008021/GO:0046982/GO:0030165/GO:0006885/GO:0030658/GO:0012506/GO:0045335/GO:0015299/GO:0031404/GO:0072320/GO:…	cellular_component/biological_process/molecular_function	A0A0A0MTB7/H0Y8Z8/A0A087WU31//D6RDZ6/E9PE15/D6RIX3
ENSG00000115828	1	-1.16511	1.16511	-0.37752	0.37752	0.93909	1.2792821469198e-8	ENSG00000115828	glutaminyl-peptide cyclotransferase [Source:HGNC Symbol;Acc:HGNC:9753]	QPCT		/GO:0046872/GO:0016740/GO:0016746/GO:0008270/GO:0005576/GO:0070062/GO:0016603/GO:0043312/GO:1904813/GO:0006464/GO:0035580/GO:1904724/GO:0017186	/molecular_function/cellular_component/biological_process	/C9JS14/B5MCZ9
ENSG00000172260	1	-1.16503	1.16503	-0.377776	0.377776	2.87208	7.51262680331e-8	ENSG00000172260	neuronal growth regulator 1 [Source:HGNC Symbol;Acc:HGNC:17302]	NEGR1		GO:0016020/GO:0007155/GO:0005886/GO:0005515/GO:0005576/GO:0031225/GO:0007626/GO:0007631/GO:0010976/GO:0098609	cellular_component/biological_process/molecular_function
ENSG00000135643	1	-1.16482	1.16482	0.378399	-0.378399	0.925553	0.000306775	ENSG00000135643	potassium calcium-activated channel subfamily M regulatory beta subunit 4 [Source:HGNC Symbol;Acc:HGNC:6289]	KCNMB4		GO:0016020/GO:0016021/GO:0006811/GO:0006813/GO:0071805/GO:0005886/GO:0015459/GO:0008076/GO:0015269/GO:0005887/GO:0005515/GO:0007268/GO:0019229/GO:0019228/GO:0005513/GO:0046928/GO:0001508	cellular_component/biological_process/molecular_function	/H0YC85
ENSG00000163220	1	-1.16475	1.16475	0.378615	-0.378615	2.18075	1.97012262404512e-26	ENSG00000163220	S100 calcium binding protein A9 [Source:HGNC Symbol;Acc:HGNC:10499]	S100A9		GO:0005634/GO:0005737/GO:0016020/GO:0008270/GO:0046872/GO:0005829/GO:0005654/GO:0005509/GO:0005886/GO:0030054/GO:0005856/GO:0005515/GO:0005576/GO:0008017/GO:0006915/GO:0006954/GO:0005615/GO:0006914/GO:0098869/GO:0002376/GO:0045087/GO:0006935/GO:0042742/GO:0050727/GO:0001816/GO:0030593/GO:0070062/GO:0062023/GO:0043312/GO:0007267/GO:0051092/GO:0002224/GO:0034774/GO:0050729/GO:2001244/GO:0030307/GO:…	cellular_component/molecular_function/biological_process
ENSG00000256377	1	-1.16469	1.16469	-0.378809	0.378809	1.08119	0.000622042
ENSG00000124299	1	-1.16443	1.16443	-0.379596	0.379596	0.411522	0.000329204	ENSG00000124299	peptidase D [Source:HGNC Symbol;Acc:HGNC:8840]	PEPD		GO:0046872/GO:0005634/GO:0005654/GO:0016787/GO:0005515/GO:0008233/GO:0006508/GO:0030145/GO:0004177/GO:0008237/GO:0016805/GO:0070062/GO:0030574/GO:0006520/GO:0004181/GO:0102009/	molecular_function/cellular_component/biological_process/	V9GY89//V9GYE4/K7ES25/A0A140VJR2/V9GYL0		hsa:5184	ko:K14213
ENSG00000131381	1	-1.1642	1.1642	-0.380314	0.380314	0.819113	5.66221779071481e-25	ENSG00000131381	rabenosyn RAB effector [Source:HGNC Symbol;Acc:HGNC:20759]	RBSN		GO:0003676/GO:0016020/GO:0015031/GO:0005829/GO:0043231/GO:0046872/GO:0008270/GO:0005886/GO:0005515/GO:0017137/GO:0005768/GO:0070062/GO:0031901/GO:0010008/GO:0016197/GO:0090160/GO:0007596/GO:0034498/GO:1903358/	molecular_function/cellular_component/biological_process/	H7C204/C9JZZ1/A0A024R2H4/D6RD50/F8WE50
ENSG00000132182	1	-1.16398	1.16398	-0.380991	0.380985	1.69153	1.03420598070304e-44	ENSG00000132182	nucleoporin 210 [Source:HGNC Symbol;Acc:HGNC:30052]	NUP210		GO:0051028/GO:0005634/GO:0016020/GO:0016021/GO:0015031/GO:0005783/GO:0005789/GO:0005643/GO:0006406/GO:0016032/GO:0005635/GO:0031965/GO:0046983	biological_process/cellular_component/molecular_function
ENSG00000166225	1	-1.16361	1.16361	0.38212	-0.38212	0.383856	0.000952254	ENSG00000166225	fibroblast growth factor receptor substrate 2 [Source:HGNC Symbol;Acc:HGNC:16971]	FRS2		/GO:2000726/GO:0016020/GO:0007186/GO:0036092/GO:0005886/GO:0046854/GO:0005887/GO:0005515/GO:0005829/GO:0012505/GO:0005913/GO:0046934/GO:0007411/GO:0051897/GO:0005088/GO:0000165/GO:0016303/GO:0008543/GO:0005104/GO:0000186/GO:0048011/GO:0005768/GO:0005168/GO:0005068/GO:0019211/GO:0007185/GO:0000187/GO:0001702/GO:0001759/GO:0002088/GO:0003281/GO:0007169/GO:0007405/GO:0008595/GO:0030900/GO:0042981/GO…	/biological_process/cellular_component/molecular_function	F8VW66/F8VZI4/L7RTG7/F8VX65/F8VZ12/F8VP54/F8VYZ7/A0A0G2JL00/F8VS98	path:hsa05205/path:hsa04714/path:hsa04722	hsa:10818	ko:K12461	Proteoglycans in cancer - Homo sapiens (human)/Thermogenesis - Homo sapiens (human)/Neurotrophin signaling pathway - Homo sapiens (human)
ENSG00000116574	1	-1.16328	1.16328	-0.383125	0.383125	1.20643	1.1648491843284e-18	ENSG00000116574	ras homolog family member U [Source:HGNC Symbol;Acc:HGNC:17794]	RHOU		GO:0016020/GO:0046872/GO:0000166/GO:0003924/GO:0005525/GO:0005794/GO:0005622/GO:0007264/GO:0005886/GO:0042995/GO:0005515/GO:0000139/GO:0030054/GO:0000082/GO:0008360/GO:0016601/GO:0030036/GO:0005925/GO:0005737/GO:0005829/GO:0051056/GO:0002102/GO:0006897/GO:0019901/GO:0007010/GO:0005938/GO:0007266/GO:0007015/GO:0019221/GO:0007163/GO:1903955/GO:0030031/GO:0032488	cellular_component/molecular_function/biological_process	A0A024R3Q7		hsa:58480	ko:K07865
ENSG00000176986	1	-1.16317	1.16317	-0.383456	0.383456	0.75855	5.06494050167991e-35	ENSG00000176986	SEC24 homolog C COPII coat complex component [Source:HGNC Symbol;Acc:HGNC:10705]	SEC24C		GO:0006886/GO:0015031/GO:0008270/GO:0006888/GO:0030127/GO:0005737/GO:0016020/GO:0046872/GO:0005783/GO:0005789/GO:0005829/GO:0005515/GO:0031410/GO:0016192/GO:0000139/GO:0012507/GO:0000149/GO:0019886/GO:0048208/GO:0002474/GO:0090110/	biological_process/molecular_function/cellular_component/	G5EA31/A0A024QZM6/A0A0U1RR58/A0A0U1RR49	path:hsa05130/path:hsa04141	hsa:9632	ko:K14007	Pathogenic Escherichia coli infection - Homo sapiens (human)/Protein processing in endoplasmic reticulum - Homo sapiens (human)
ENSG00000163702	1	-1.16317	1.16317	-0.383466	0.383466	1.13275	7.42998670059091e-21	ENSG00000163702	interleukin 17 receptor C [Source:HGNC Symbol;Acc:HGNC:18358]	IL17RC		GO:0016020/GO:0016021/GO:0005886/GO:0097400/GO:0030368//GO:0005102/GO:0050832/GO:0071621/GO:1900017/GO:2000778/GO:0009986	cellular_component/biological_process/molecular_function/	F8WB43//F8WEG5/A8K3Q5/B4DI24/G3V177/C9K0M1/F8WD65/F8WC09/C9JSZ3/F8WE27
ENSG00000111276	1	-1.16311	1.16312	-0.383625	0.383613	1.02393	3.88847435565843e-19	ENSG00000111276	cyclin dependent kinase inhibitor 1B [Source:HGNC Symbol;Acc:HGNC:1785]	CDKN1B		GO:1904706/GO:0008285/GO:0005634/GO:0005737/GO:0043231/GO:0005515/GO:0007049/GO:0007050/GO:0004860/GO:0004861/GO:0045732/GO:0005829/GO:0005768/GO:0042127/GO:0006977/GO:0005654/GO:0007096/GO:0071850/GO:0007219/GO:0019901/GO:0001666/GO:0045892/GO:0045736/GO:0045786/GO:0000082/GO:0019903/GO:0045930/GO:0008284/GO:0051087/GO:0030308/GO:0010942/GO:0044877/GO:0000079/GO:0045737/GO:0042493/GO:0043200/GO:…	biological_process/cellular_component/molecular_function	/H7C2T1/E7ES52
ENSG00000273802	1	-1.16309	1.16309	-0.383681	0.383681	1.34662	1.16406e-05	ENSG00000273802	histone cluster 1 H2B family member g [Source:HGNC Symbol;Acc:HGNC:4746]	HIST1H2BG		GO:0005634/GO:0005829/GO:0005654/GO:0003677/GO:0046982/GO:0006334/GO:0000786/GO:0005694/GO:0005515/GO:0005615/GO:0042802/GO:0042742/GO:0016567/GO:0070062/GO:0050830/GO:0061844/GO:0019731/GO:0002227	cellular_component/molecular_function/biological_process
ENSG00000197548	1	-1.16294	1.16293	-0.384162	0.38417	1.53642	5.12669040636235e-73	ENSG00000197548	autophagy related 7 [Source:HGNC Symbol;Acc:HGNC:16935]	ATG7		GO:0005737/GO:0006914/GO:0015031/GO:0016567/GO:0042803/GO:0008641/GO:0005515/GO:0005576/GO:0005829/GO:0075044/GO:0005930/GO:0000045/GO:0000422/GO:0006995/GO:0009267/GO:0043065/GO:0000407/GO:0043312/GO:0061025/GO:0008134/GO:0034774/GO:1904813/GO:0006464/GO:0016236/GO:0034727/GO:0045732/GO:0006501/GO:0004839/GO:0019778/GO:0019779/GO:0006497/GO:0031401/GO:0039521/GO:0044805/GO:0051607/GO:0071455/GO:…	cellular_component/biological_process/molecular_function/	/H7C059/H7C2J8/H7C2R3/H7BZ92/H7C369/C9JKA3/C9J415/C9JNU2/C9JGL2/C9JE55/C9JFF4/F8WDY9
ENSG00000279716	1	-1.16268	1.16268	-0.384935	0.384934	0.841515	0.000174441
ENSG00000174607	1	-1.16251	1.16251	-0.385453	0.385453	1.44422	4.04822e-06	ENSG00000174607	UDP glycosyltransferase 8 [Source:HGNC Symbol;Acc:HGNC:12555]	UGT8		GO:0016020/GO:0016021/GO:0016740/GO:0016757/GO:0006629/GO:0016758/GO:0006665/GO:0005886/GO:0043231/GO:0007417/GO:0007422/GO:0008194/GO:0006687/GO:0008489/GO:0047263/GO:0002175/GO:0006682/GO:0007010/GO:0030913/GO:0048812	cellular_component/molecular_function/biological_process	D6RFW2/
ENSG00000188321	1	-1.16229	1.16229	-0.386099	0.386099	0.818296	9.83350741386406e-9	ENSG00000188321	zinc finger protein 559 [Source:HGNC Symbol;Acc:HGNC:28197]	ZNF559		GO:0003676/GO:0046872/GO:0006355/GO:0005622/GO:0005634/GO:0003677/GO:0005515/GO:0006357/GO:0000981/	molecular_function/biological_process/cellular_component/	A0A0A0MTT2/K7EM21/K7ERK9/K7EKU6/A0A024R7B5//S4R3U0/K7EK98/A0A0A0MTS4/K7EN17/S4R3F2/K7EQI4	path:hsa05168	hsa:84527	ko:K09228	Herpes simplex virus 1 infection - Homo sapiens (human)
ENSG00000135269	1	-1.16225	1.16225	-0.386235	0.386235	0.57613	2.97115513240153e-7	ENSG00000135269	testin LIM domain protein [Source:HGNC Symbol;Acc:HGNC:14620]	TES		GO:0003723/GO:0005634/GO:0005737/GO:0008270/GO:0046872/GO:0005829/GO:0005886/GO:0005925/GO:0030054/GO:0005515/GO:0042127/GO:0045296/GO:0008285/GO:0032991	molecular_function/cellular_component/biological_process	/A4D0U5/F8W7T0/F8WDI4/H7BYK1		hsa:26136
ENSG00000196205	1	-1.16199	1.16199	-0.387014	0.387014	0.606892	5.1283818803662e-7
ENSG00000174437	1	-1.16159	1.16159	-0.388219	0.388219	0.43572	7.25045210358109e-17	ENSG00000174437	ATPase sarcoplasmic/endoplasmic reticulum Ca2+ transporting 2 [Source:HGNC Symbol;Acc:HGNC:812]	ATP2A2		/GO:0010460/GO:0016020/GO:0016021/GO:0046872/GO:0000166/GO:0005524/GO:0005654/GO:0005783/GO:0005789/GO:0016787/GO:0006811/GO:0005515/GO:0005388/GO:0006816/GO:0099132/GO:0034220/GO:0016529/GO:0033017/GO:0005887/GO:0086036/GO:0007155/GO:0019899/GO:0044548/GO:0005509/GO:1903779/GO:0008553/GO:0006874/GO:0032470/GO:0070588/GO:0031095/GO:0008544/GO:0034976/GO:0032469/GO:0086039/GO:0010882/GO:0070296/GO…	/biological_process/cellular_component/molecular_function	/A0A0S2Z3L2/H7C5W9/A0A0C4DH86/J3QSY6/F8W1Z7	path:hsa04024/path:hsa05412/path:hsa05414/path:hsa04022/path:hsa05010/path:hsa04919/path:hsa05410/path:hsa04260/path:hsa04261/path:hsa05017/path:hsa04020/path:hsa04972	hsa:488	ko:K05853	cAMP signaling pathway - Homo sapiens (human)/Arrhythmogenic right ventricular cardiomyopathy (ARVC) - Homo sapiens (human)/Dilated cardiomyopathy (DCM) - Homo sapiens (human)/cGMP-PKG signaling pathway - Homo sapiens (human)/Alzheimer disease - Homo sapiens (human)/Thyroid hormone signaling pathway - Homo sapiens (human)/Hypertrophic cardiomyopathy (HCM) - Homo sapiens (human)/Cardiac muscle con…
ENSG00000135477	1	-1.16118	1.16118	-0.389427	0.389427	1.67439	1.20508707808846e-8
ENSG00000101928	1	-1.1609	1.1609	-0.390279	0.390279	0.522792	0.000150581	ENSG00000101928	motile sperm domain containing 1 [Source:HGNC Symbol;Acc:HGNC:25235]	MOSPD1		GO:0048471/GO:0045944/GO:0005737/GO:0005634/GO:0016020/GO:0016021/GO:0005783/GO:0005789/GO:0005794/GO:0000139/GO:0030154/GO:0000122	cellular_component/biological_process
ENSG00000111596	1	-1.16077	1.16077	-0.390669	0.390669	0.75149	4.50852827792327e-10	ENSG00000111596	CCR4-NOT transcription complex subunit 2 [Source:HGNC Symbol;Acc:HGNC:7878]	CNOT2		GO:0005634/GO:0005829/GO:0005886//GO:0005737/GO:0016020/GO:0006355/GO:0005515/GO:0007275/GO:0090503/GO:0031047/GO:0010606/GO:0000122/GO:0006977/GO:0004535/GO:0000289/GO:0006417/GO:0017148/GO:0033147/GO:2000036/GO:0000932/GO:0030014/GO:0006357/GO:0003712/GO:0030015/GO:0001226/GO:0001829	cellular_component//biological_process/molecular_function	F8VV05/H0YHT8/F8VX63/F8VUB4/H0YH84/F8VSK9/F8VPX5/F8W145/F8VS14/F8VWH8//F8VP97/H0YI11/F8VVY1/F8VQF4/F8VRS8/F8VQD8/F8VV52/H0YI80/A0A087X050/F8VVD4/F8VRJ3/A0A024RBD8/H0YHT6	path:hsa03018	hsa:4848	ko:K12605	RNA degradation - Homo sapiens (human)
ENSG00000117335	1	-1.16064	1.16062	-0.391071	0.391091	0.555026	5.10282e-05	ENSG00000117335	CD46 molecule [Source:HGNC Symbol;Acc:HGNC:6953]	CD46		GO:0016020/GO:0016021/GO:0005886/GO:0005515/GO:0007338/GO:0031410/GO:0009986/GO:0046718/GO:0002376/GO:0045087/GO:0005925/GO:0002250/GO:0030449/GO:0070062/GO:0010628/GO:0042102/GO:0016032/GO:0002456/GO:0005887/GO:0010629/GO:0071636/GO:0006958/GO:0038023/GO:0008593/GO:0045296/GO:0001618/GO:0032733/GO:0032613/GO:0035581/GO:0043382/GO:0045591/GO:0002079	cellular_component/molecular_function/biological_process	R4GN18/
ENSG00000138768	1	-1.16011	1.16011	-0.3926	0.3926	0.40178	0.000264803	ENSG00000138768	USO1 vesicle transport factor [Source:HGNC Symbol;Acc:HGNC:30904]	USO1		GO:0003723/GO:0005737/GO:0016020/GO:0006886/GO:0015031/GO:0005794/GO:0001650/GO:0005829/GO:0005515/GO:0008565/GO:0000139/GO:0048280/GO:0005783/GO:0016192/GO:0006888/GO:0045296/GO:0012507/GO:0061025/GO:0030133/GO:0048208/GO:0045056/GO:0048211/GO:0005795/GO:0007030/GO:0048471	molecular_function/cellular_component/biological_process	A0A024RDG1/
ENSG00000102230	1	-1.1599	1.1599	0.393228	-0.393227	4.24096	1.84834044484763e-11	ENSG00000102230	phosphate cytidylyltransferase 1 choline beta [Source:HGNC Symbol;Acc:HGNC:8755]	PCYT1B		GO:0016740/GO:0005783/GO:0003824/GO:0006629/GO:0008654/GO:0009058/GO:0016779/GO:0005789/GO:0031210/GO:0006656/GO:0005737/GO:0006657/GO:0004105/GO:0001541/GO:0007283	molecular_function/cellular_component/biological_process	/F2Z2B1
ENSG00000165935	1	-1.15967	1.15967	-0.393898	0.393898	1.36533	2.96564e-05	ENSG00000165935	single-pass membrane protein with coiled-coil domains 2 [Source:HGNC Symbol;Acc:HGNC:34448]	SMCO2		GO:0016020/GO:0016021	cellular_component	/J3KNC3
ENSG00000164168	1	-1.15962	1.15962	-0.394066	0.394066	0.673984	9.35166646164317e-13	ENSG00000164168	transmembrane protein 184C [Source:HGNC Symbol;Acc:HGNC:25587]	TMEM184C		GO:0016020/GO:0016021	cellular_component	H0Y8I5//A0A0C4DGC8
ENSG00000122882	1	-1.15863	1.15863	-0.396967	0.396967	0.577386	4.51027526854686e-9	ENSG00000122882	ecdysoneless cell cycle regulator [Source:HGNC Symbol;Acc:HGNC:17029]	ECD		/GO:0006397/GO:0008380/GO:0005634/GO:0005737/GO:0005829/GO:0005654/GO:0005515/GO:0045944/GO:0003713/GO:0006366/GO:0035035/GO:0097255/GO:0006110/GO:0008283/GO:2000045	/biological_process/cellular_component/molecular_function	/C9JGV1/C9J316/S4R458/F2Z2R1
ENSG00000039139	1	-1.15743	1.15743	0.400449	-0.400449	0.547094	4.6549008074064e-7	ENSG00000039139	dynein axonemal heavy chain 5 [Source:HGNC Symbol;Acc:HGNC:2950]	DNAH5		GO:0005737/GO:0000166/GO:0005524/GO:0003774/GO:0003777/GO:0005856/GO:0042995/GO:0016887/GO:0005874/GO:0007018/GO:0030286/GO:0005929/GO:0007368/GO:0036158/GO:0051959/GO:0045503/GO:0005930/GO:0097729/GO:0045505/GO:0008569/GO:0003341/GO:0030317/GO:0060271/GO:0036157/GO:0007507/GO:0021670/GO:0005858	cellular_component/molecular_function/biological_process
ENSG00000170296	1	-1.15695	1.15695	-0.401843	0.401843	0.483565	2.2493425765389e-11	ENSG00000170296	GABA type A receptor-associated protein [Source:HGNC Symbol;Acc:HGNC:4067]	GABARAP		GO:0005737/GO:0016020/GO:0015031/GO:0005794/GO:0005856/GO:0005515/GO:0006915/GO:0000139/GO:0031410/GO:0005874/GO:0006914/GO:0005829/GO:0000421/GO:0005930/GO:0000045/GO:0000422/GO:0006995/GO:0012505/GO:0031625/GO:0005776/GO:0005886/GO:0008625/GO:0007268/GO:0048487/GO:0016236/GO:0050811/GO:0008017/GO:0000226/GO:0006605/GO:0097352/GO:0005764/GO:0005790/GO:0005875/GO:0015629/GO:0044297/GO:0048471/GO:…	cellular_component/biological_process/molecular_function	H6UMI1/I3L236/I3L3J4/
ENSG00000173068	1	-1.15693	1.15693	-0.401879	0.401879	2.2144	2.76186e-05	ENSG00000173068	basonuclin 2 [Source:HGNC Symbol;Acc:HGNC:30988]	BNC2		GO:0003676/GO:0005634/GO:0046872/GO:0005654/GO:0006357/GO:0000981/GO:0003677/GO:0003416/GO:0043586/GO:0060021/GO:0060485//GO:0008270	molecular_function/cellular_component/biological_process/	Q06HB9/F5H586/S4R351/H0Y4J1/Q06HC7/S4R3R8/B1APH0/H0Y6W5//S4R3X5/S4R3K9/A0A1B0GX98
ENSG00000152558	1	-1.15687	1.15687	-0.402048	0.402048	0.377284	1.78468e-05	ENSG00000152558	transmembrane protein 123 [Source:HGNC Symbol;Acc:HGNC:30138]	TMEM123		GO:0016020/GO:0016021/GO:0005515/GO:0038023/GO:0009897/GO:0031410/GO:0070267/	cellular_component/molecular_function/biological_process/	/E9PSB1/E9PJW0/E9PKT4/A0A024R3A5
ENSG00000144597	1	-1.15668	1.15668	-0.402611	0.402611	0.476891	4.46178e-05	ENSG00000144597	ELL associated factor 1 [Source:HGNC Symbol;Acc:HGNC:20907]	EAF1		GO:0005634/GO:0016607/GO:0043231/GO:0005654/GO:0006355/GO:0045171/GO:0005515/GO:0016604/GO:0032783/GO:0006366/GO:0006368/GO:0008023/GO:0015030	cellular_component/biological_process/molecular_function	/F8WFA5
ENSG00000259354	1	-1.15632	1.15632	-0.403646	0.403646	1.04132	0.000882695
ENSG00000235884	1	-1.15599	1.15599	0.404572	-0.404572	0.734525	0.000176359
ENSG00000166224	1	-1.15583	1.15583	0.40505	-0.40505	0.909121	3.87291597742292e-24	ENSG00000166224	sphingosine-1-phosphate lyase 1 [Source:HGNC Symbol;Acc:HGNC:10817]	SGPL1		GO:0016020/GO:0016021/GO:0005783/GO:0005789/GO:0003824/GO:0016829/GO:0006629/GO:0006631/GO:0005515/GO:0030170/GO:0006915/GO:0019752/GO:0016831/GO:0006665/GO:0030176/GO:0097190/GO:0030148/GO:0008117/GO:0001553/GO:0001570/GO:0001667/GO:0001822/GO:0006672/GO:0006807/GO:0007283/GO:0008209/GO:0008210/GO:0008585/GO:0009791/GO:0010761/GO:0030097/GO:0030149/GO:0033327/GO:0040014/GO:0048008/GO:0048705/GO:…	cellular_component/molecular_function/biological_process	/H7BXL7/H0Y3V8
ENSG00000165879	1	-1.15556	1.15556	0.405804	-0.405804	0.944592	0.000589168	ENSG00000165879	FRAT1 WNT signaling pathway regulator [Source:HGNC Symbol;Acc:HGNC:3944]	FRAT1		GO:0005737/GO:0043231/GO:0005829/GO:0005515/GO:0016055/GO:0060070/GO:1904886/GO:0090263	cellular_component/molecular_function/biological_process
ENSG00000214753	1	-1.15552	1.15552	-0.405922	0.405922	0.562581	1.18489247015317e-17	ENSG00000214753	heterogeneous nuclear ribonucleoprotein U like 2 [Source:HGNC Symbol;Acc:HGNC:25451]	HNRNPUL2		GO:0003723/GO:0005634/GO:0016020/GO:0005654/GO:0008150	molecular_function/cellular_component/biological_process
ENSG00000134317	1	-1.15537	1.15537	0.40634	-0.40634	0.831488	3.41861e-06	ENSG00000134317	grainyhead like transcription factor 1 [Source:HGNC Symbol;Acc:HGNC:17923]	GRHL1		/GO:0005634/GO:0005794/GO:0043231/GO:0005829/GO:0005654/GO:0006366/GO:0003677/GO:0031490/GO:0042803/GO:0007275/GO:0043565/GO:0005515/GO:0006357/GO:0003700/GO:0000981/GO:0000978/GO:0045944/GO:0044212/GO:0001077/GO:0008544/GO:0019216/GO:0001228/GO:0002934/GO:0045616/GO:0061436	/cellular_component/biological_process/molecular_function	F8WFB0/C9JYY8//B7Z1S6
ENSG00000153339	1	-1.15516	1.15516	0.406957	-0.406957	0.43825	0.000288616	ENSG00000153339	trafficking protein particle complex 8 [Source:HGNC Symbol;Acc:HGNC:29169]	TRAPPC8		GO:0005794/GO:0005515/GO:0016192/GO:0006888/GO:0005829/GO:0017112/GO:0000045/GO:0032258/GO:0000407/GO:0007030/GO:0031410/GO:0030008/GO:0034497/GO:1990072/GO:0030242/	cellular_component/molecular_function/biological_process/	J3QSA1//J3QQJ5/J3KSL8/J3QR00/J3QQS5
ENSG00000119636	1	-1.155	1.155	0.4074	-0.4074	1.20479	4.3652e-06	ENSG00000119636	basal body orientation factor 1 [Source:HGNC Symbol;Acc:HGNC:19855]	BBOF1		GO:0036064/GO:0005737/GO:0005856/GO:0042995/GO:0005929/GO:0044458	cellular_component/biological_process	A0A0B4J2D7//G3V488
ENSG00000267469	1	-1.15487	1.15487	-0.407768	0.407768	0.81411	2.58311489936717e-9
ENSG00000253719	1	-1.15437	1.15435	-0.409202	0.409223	0.562361	1.19576246774634e-10	ENSG00000253719	ataxin 7 like 3B [Source:HGNC Symbol;Acc:HGNC:37931]	ATXN7L3B		GO:0005737/GO:0005515/GO:0010468	cellular_component/molecular_function/biological_process
ENSG00000113916	1	-1.1541	1.1541	0.409948	-0.409948	1.07334	9.31673659319187e-8	ENSG00000113916	B cell CLL/lymphoma 6 [Source:HGNC Symbol;Acc:HGNC:1001]	BCL6		GO:0003676/GO:0005634/GO:0005794/GO:0046872/GO:0005654/GO:0003677/GO:0003700/GO:0005515/GO:0006974/GO:0006954/GO:0002376/GO:0043565/GO:0000977/GO:0042802/GO:0000981/GO:0000122/GO:0043065/GO:0001227/GO:0030308/GO:0042981/GO:0045892/GO:0019221/GO:0005657/GO:0045591/GO:0003682/GO:0050727/GO:0000060/GO:0042127/GO:0050776/GO:0001161/GO:0031490/GO:0000902/GO:0001953/GO:0002467/GO:0002634/GO:0002829/GO:…	molecular_function/cellular_component/biological_process/	/C9JL16/A0A0C4DH53/C9JCS5
ENSG00000138795	1	-1.15402	1.15402	0.410168	-0.410168	2.79433	3.23577e-05	ENSG00000138795	lymphoid enhancer binding factor 1 [Source:HGNC Symbol;Acc:HGNC:6551]	LEF1		GO:0045944/GO:0005737/GO:0005634/GO:0045893/GO:0071345/GO:0008013/GO:0006366/GO:0006357/GO:0003677/GO:0005515/GO:0043401/GO:0016055/GO:0043565/GO:0000978/GO:0001077/GO:0003682/GO:0003700/GO:0003705/GO:0008134/GO:0008301/GO:0044212/GO:0000122/GO:0001569/GO:0001756/GO:0001837/GO:0001944/GO:0002040/GO:0021542/GO:0021766/GO:0021861/GO:0021873/GO:0021943/GO:0022407/GO:0030111/GO:0030326/GO:0030509/GO:…	biological_process/cellular_component/molecular_function	D6RIV1//D6RID7/D6RAB1/A0A024RDI7
ENSG00000104635	1	-1.15366	1.15366	-0.411192	0.411192	0.336777	1.14012e-05	ENSG00000104635	solute carrier family 39 member 14 [Source:HGNC Symbol;Acc:HGNC:20858]	SLC39A14		GO:0005737/GO:0016020/GO:0016021/GO:0055085/GO:0006811/GO:0005886/GO:0042995/GO:0046873/GO:0030001/GO:0005887/GO:0030027/GO:0005385/GO:0006829/GO:0071577/GO:0006882/GO:0071578/GO:0015093/GO:0006826/GO:1903874/	cellular_component/biological_process/molecular_function/	E5RGA7/E5RJG5/E5RJ40/E5RFZ8/E5RFF5/E5RFT1/E5RIP4/
ENSG00000089154	1	-1.15349	1.15349	-0.411659	0.411659	0.600617	2.2538874295904e-11	ENSG00000089154	GCN1 eIF2 alpha kinase activator homolog [Source:HGNC Symbol;Acc:HGNC:4199]	GCN1		GO:0003723/GO:0005737/GO:0016020/GO:0005829/GO:0005840/GO:0045859/GO:0006417/GO:0019901/GO:0043022/GO:0019887/GO:0045296/GO:0034198/GO:0005844/GO:0006412/GO:0008135/GO:1990253/GO:0033674/GO:0036003	molecular_function/cellular_component/biological_process
ENSG00000178075	1	-1.15337	1.15337	-0.411993	0.411993	1.21632	1.01259e-05	ENSG00000178075	GRAM domain containing 1C [Source:HGNC Symbol;Acc:HGNC:25252]	GRAMD1C		GO:0016020/GO:0016021/GO:0005515/	cellular_component/molecular_function/	/C9J7B8/B4DF12/C9K0V2/F8WCA8/E9PHT3
ENSG00000109814	1	-1.15336	1.15336	-0.412021	0.412021	0.636655	8.9196540720474e-8	ENSG00000109814	UDP-glucose 6-dehydrogenase [Source:HGNC Symbol;Acc:HGNC:12525]	UGDH	00520+1.1.1.22/00040+1.1.1.22/00053+1.1.1.22/	GO:0005654/GO:0016491/GO:0055114/GO:0016616/GO:0051287/GO:0008152/GO:0022900/GO:0005634/GO:0003824/GO:0005829/GO:0070062/GO:0003979/GO:0009055/GO:0001702/GO:0006011/GO:0006024/GO:0006065	cellular_component/molecular_function/biological_process	/D6RHF4/E7ETF4/E7EV97/E9PBD2/E7ER95/E7ER83
ENSG00000166295	1	-1.15306	1.15306	0.412869	-0.412869	0.541152	4.7222712765003e-11	ENSG00000166295	anaphase promoting complex subunit 16 [Source:HGNC Symbol;Acc:HGNC:26976]	ANAPC16		GO:0005634/GO:0005737/GO:0005829/GO:0016567/GO:0051301/GO:0005694/GO:0007049/GO:0005680/GO:0000775/GO:0000776/GO:0000777/GO:0005654/GO:0031145	cellular_component/biological_process	A0A087WUN5/
ENSG00000158373	1	-1.15267	1.15266	-0.413954	0.413971	0.784557	4.1716698063563e-8	ENSG00000158373	histone cluster 1 H2B family member d [Source:HGNC Symbol;Acc:HGNC:4747]	HIST1H2BD		GO:0005634/GO:0005829/GO:0005654/GO:0003677/GO:0046982/GO:0000786/GO:0005694/GO:0016567/GO:0070062/GO:0003674/GO:0006334	cellular_component/molecular_function/biological_process	A0A024QZZ7	path:hsa05034/path:hsa05203/path:hsa05322	hsa:3017	ko:K11252	Alcoholism - Homo sapiens (human)/Viral carcinogenesis - Homo sapiens (human)/Systemic lupus erythematosus - Homo sapiens (human)
ENSG00000078246	1	-1.15266	1.15264	-0.413994	0.414011	0.663081	9.08551544337254e-12	ENSG00000078246	tubby like protein 3 [Source:HGNC Symbol;Acc:HGNC:12425]	TULP3		GO:0005634/GO:0005737/GO:0016020/GO:0005730/GO:0005886/GO:0042995/GO:0005515/GO:0006355/GO:0005576/GO:0007186/GO:0007275/GO:0035091/GO:0005929/GO:1903546/GO:0097500/GO:0005546/GO:0019899/GO:0061512/GO:0044877/GO:0045879/GO:0120160/GO:0008277/GO:0097546/GO:0097731//GO:0001841/GO:0001843/GO:0007420/GO:0008589/GO:0009952/GO:0021904/GO:0021914/GO:0021915/GO:0021953/GO:0031076/GO:0042733/GO:0048702/GO…	cellular_component/molecular_function/biological_process/	F5GWL5/F5H7B9//H0YFU8/H0YG12
ENSG00000259768	1	-1.15137	1.15137	-0.417539	0.41754	1.03591	2.82328134480466e-16
ENSG00000154305	1	-1.15115	1.15113	-0.418172	0.418199	0.363746	0.000130377	ENSG00000154305	MIA SH3 domain ER export factor 3 [Source:HGNC Symbol;Acc:HGNC:24008]	MIA3		GO:0030336/GO:0007162/GO:0016020/GO:0016021/GO:0015031/GO:0043231/GO:0005783/GO:0005789/GO:0005515/GO:0016192/GO:0006887/GO:0006888/GO:0000139/GO:0044267/GO:0042954/GO:0009306/GO:0035459/GO:0070971/GO:0043687/GO:0042953/GO:0005788/GO:0002042/GO:0090110/GO:1903038/GO:0042060/GO:0002687/GO:0140052/GO:2000402/	biological_process/cellular_component/molecular_function/	A0A0A0MRH6/H7C0T4/
ENSG00000139116	1	-1.15115	1.15115	-0.418158	0.418158	0.474581	0.000642952	ENSG00000139116	kinesin family member 21A [Source:HGNC Symbol;Acc:HGNC:19349]	KIF21A		GO:0000166/GO:0005524/GO:0005829/GO:0003774/GO:0005886/GO:0003777/GO:0008017/GO:0007018/GO:0005737/GO:0005856/GO:0005515/GO:0005874/GO:0016887/GO:0005871	molecular_function/cellular_component/biological_process	/H0YHG9/H0YIM7/H0YHT2/H0YIM6/A0A1B0GV47/H0YI78
ENSG00000164038	1	-1.15098	1.15096	-0.41864	0.418655	0.803368	6.79467705817164e-8	ENSG00000164038	solute carrier family 9 member B2 [Source:HGNC Symbol;Acc:HGNC:25143]	SLC9B2		GO:0016020/GO:0016021/GO:0055085/GO:0031514/GO:0005739/GO:0006811/GO:0005886/GO:0042995/GO:0015297/GO:0015299/GO:0006812/GO:0006814/GO:0035725/GO:1902600/GO:0030054/GO:0031410/GO:0045202/GO:0031966/GO:0005929/GO:0005768/GO:0034220/GO:0016323/GO:0010008/GO:0042802/GO:0016324/GO:0030672/GO:0005743/GO:0030317/GO:0015385/GO:0097228/GO:0005451/GO:0010348/GO:0061178/GO:0072583/GO:2001206/GO:0097708/GO:…	cellular_component/biological_process/molecular_function	B7Z676/E9PE63/D6RGJ7/A0A024RDJ7/D6R9P2/A0A0C4DGB3		hsa:133308	ko:K23994
ENSG00000204130	1	-1.15082	1.15082	-0.419073	0.419073	0.670629	2.31037454830373e-8	ENSG00000204130	RUN and FYVE domain containing 2 [Source:HGNC Symbol;Acc:HGNC:19761]	RUFY2		GO:0046872//GO:0005634/GO:0005737/GO:0005768/GO:0008150/GO:0017124/GO:0030100	molecular_function//cellular_component/biological_process	S4R3P2/H0YD93/
ENSG00000158195	1	-1.15076	1.15076	-0.419229	0.419229	0.264667	0.000888154	ENSG00000158195	WAS protein family member 2 [Source:HGNC Symbol;Acc:HGNC:12733]	WASF2		GO:0005737/GO:0003779/GO:0030036/GO:0005856/GO:0042995/GO:0005515/GO:0038096/GO:0005829/GO:0045296/GO:0044877/GO:0030027/GO:0070062/GO:0032991/GO:0016032/GO:0017124/GO:0015629/GO:0048010/GO:0010592/GO:0051018/GO:0007188/GO:0051497/GO:0031209/GO:0005622/GO:0001525/GO:0001667/GO:0006897/GO:0016601/GO:0030032/GO:0030048/GO:0035855/GO:0072673/GO:0001726/GO:0005769/GO:0005911	cellular_component/molecular_function/biological_process
ENSG00000189079	1	-1.15066	1.15066	-0.4195	0.4195	0.738327	1.30308358172511e-13	ENSG00000189079	AT-rich interaction domain 2 [Source:HGNC Symbol;Acc:HGNC:18037]	ARID2		GO:0008285/GO:0030336/GO:0003676/GO:0005634/GO:0046872/GO:0005654/GO:0006355/GO:0006325/GO:0003677/GO:0005886/GO:0005515/GO:0006357/GO:0000981/GO:0006337/GO:0003007/GO:0042592/GO:0048568/GO:0060038/GO:0060982/GO:0072358/	biological_process/molecular_function/cellular_component/	F8W108//F8WCU9/A0A087WY37/F8VWP4
ENSG00000170485	1	-1.15032	1.15031	-0.420439	0.420455	0.744193	0.000856911	ENSG00000170485	neuronal PAS domain protein 2 [Source:HGNC Symbol;Acc:HGNC:7895]	NPAS2		GO:0005634/GO:0005737/GO:0046872/GO:0005829/GO:0005654/GO:0046983/GO:0006355/GO:0003677/GO:0003700/GO:0006974/GO:0048511/GO:0005667/GO:0045893/GO:0005515/GO:0000981/GO:0045739/GO:0007417/GO:0000980/GO:0051879/GO:0007623/GO:0032922/GO:0045944/GO:0051775/GO:0019216/GO:0060548/GO:2001020/	cellular_component/molecular_function/biological_process/	H7C0J4/H7C0Z2/H7C080/A2I2P5/H7BZA3/H7BZY5	path:hsa04710	hsa:4862	ko:K09026	Circadian rhythm - Homo sapiens (human)
ENSG00000107679	1	-1.15015	1.15012	0.420949	-0.42092	0.472999	3.56058005045079e-9	ENSG00000107679	pleckstrin homology domain containing A1 [Source:HGNC Symbol;Acc:HGNC:14335]	PLEKHA1		GO:0005634/GO:0005737/GO:0016020/GO:0005829/GO:0005654/GO:0005886/GO:0005515/GO:0008289/GO:0070062/GO:0032587/GO:0030165/GO:0043325/GO:0014065/GO:0050853/GO:0006661/GO:0051898/GO:0070301/GO:0045184/GO:0031529/GO:0001553/GO:0007283/GO:0008209/GO:0008210/GO:0008585/GO:0009791/GO:0033327/GO:0035264/GO:0048008/GO:0048705/GO:0060021/GO:0060325/	cellular_component/molecular_function/biological_process/	/Q5RGS4/R4GMZ9
ENSG00000221978	1	-1.14987	1.14987	-0.421676	0.421676	0.37154	4.20055e-06	ENSG00000221978	cyclin L2 [Source:HGNC Symbol;Acc:HGNC:20570]	CCNL2		/GO:0005634/GO:0016607/GO:0043231/GO:0005654/GO:0005515/GO:0045944/GO:0016538/GO:0045737/GO:1901409/GO:0000307	/cellular_component/molecular_function/biological_process	J3QSH2/C9J148//A0A0A0MSF3/J3KRL1
ENSG00000151376	1	-1.14955	1.14955	-0.422535	0.422533	0.502928	1.7532e-06	ENSG00000151376	malic enzyme 3 [Source:HGNC Symbol;Acc:HGNC:6985]	ME3		GO:0046872/GO:0016491/GO:0055114/GO:0005739/GO:0051287/GO:0048037/GO:0005759/GO:0004470/GO:0004471/GO:0006099/GO:0006108/GO:0004473/GO:0008948/GO:0006090/GO:0009060/GO:0072592/	molecular_function/biological_process/cellular_component/	E9PMB9/Q6TCH8/E9PND9/E9PKA0//E9PNN2	path:hsa03320/path:hsa00620/path:hsa01100/path:hsa01200	hsa:10873	ko:K00029	PPAR signaling pathway - Homo sapiens (human)/Pyruvate metabolism - Homo sapiens (human)/Metabolic pathways - Homo sapiens (human)/Carbon metabolism - Homo sapiens (human)
ENSG00000006715	1	-1.14855	1.14855	-0.42524	0.42524	0.429309	3.64146491489582e-9	ENSG00000006715	VPS41 HOPS complex subunit [Source:HGNC Symbol;Acc:HGNC:12713]	VPS41		GO:0016020/GO:0006886/GO:0015031/GO:0016192/GO:0046872/GO:0005794/GO:0005765/GO:0005515/GO:0031410/GO:0006914/GO:0046907/GO:0005764/GO:0042802/GO:0005768/GO:0031902/GO:0030123/GO:0005769/GO:0008333/GO:0010008/GO:0005770/GO:0030136/GO:0071439/GO:0008017/GO:0043621/GO:0034058/GO:0035542/GO:0042144/GO:0045055/GO:1902774/GO:0005798/GO:0015630/GO:0030897/GO:0005622/	cellular_component/biological_process/molecular_function/	H7BZX6/C9JZ11/H7BXH3//C9JU58/H7C0K2/C9J2U9/C9J3F8
ENSG00000185009	1	-1.14834	1.14834	-0.425799	0.425799	0.669382	2.27523356053613e-18	ENSG00000185009	adaptor related protein complex 3 subunit mu 1 [Source:HGNC Symbol;Acc:HGNC:569]	AP3M1		GO:0016020/GO:0006886/GO:0015031/GO:0016192/GO:0005794/GO:0005765/GO:0008089/GO:0048490/GO:0030131/GO:1904115/GO:0005515/GO:0031410/GO:0030659/GO:0016032/GO:0005764/GO:0017137/GO:0006622	cellular_component/biological_process/molecular_function	A0A024QZR5	path:hsa04142	hsa:26985	ko:K12398	Lysosome - Homo sapiens (human)
ENSG00000072858	1	-1.14831	1.14831	-0.425895	0.425895	2.83869	1.31666579636744e-9	ENSG00000072858	SID1 transmembrane family member 1 [Source:HGNC Symbol;Acc:HGNC:25967]	SIDT1		GO:0003723/GO:0016020/GO:0016021/GO:0051033/GO:0033227	molecular_function/cellular_component/biological_process
ENSG00000052795	1	-1.14726	1.14724	-0.428735	0.428758	0.389201	0.000322807	ENSG00000052795	folliculin interacting protein 2 [Source:HGNC Symbol;Acc:HGNC:29280]	FNIP2		GO:0005737/GO:0006974/GO:0043086/GO:0005515/GO:0000122/GO:0033138/GO:0006468/GO:0051087/GO:0001932/GO:0008630/GO:0042030/GO:0031334/	cellular_component/biological_process/molecular_function/	H0Y8F3/D6RFH5/
ENSG00000111790	1	-1.14701	1.14703	-0.429367	0.429348	0.583183	6.54389204350488e-16	ENSG00000111790	FGFR1 oncogene partner 2 [Source:HGNC Symbol;Acc:HGNC:23098]	FGFR1OP2		GO:0005737/GO:0018108/GO:0005515/GO:0005829/GO:0004713/GO:0042803/GO:0009611/GO:0042060/	cellular_component/biological_process/molecular_function/	F5GX47/
ENSG00000283633	1	-1.14699	1.14699	0.429425	-0.429426	1.09271	7.50664e-05
ENSG00000170860	1	-1.14686	1.14687	-0.429776	0.429764	0.898494	1.63940531948325e-19	ENSG00000170860	LSM3 homolog U6 small nuclear RNA and mRNA degradation associated [Source:HGNC Symbol;Acc:HGNC:17874]	LSM3		GO:0003723/GO:0006397/GO:0008380/GO:0005634/GO:0005515/GO:0005681/GO:0000398/GO:0071013/GO:0000956/GO:0005654/GO:0005829/GO:0000932/GO:0033962/GO:0046540/GO:0043928/GO:1990726/GO:0071005/GO:0005688/GO:0120115	molecular_function/biological_process/cellular_component
ENSG00000153561	1	-1.14684	1.14684	0.429838	-0.429838	0.646136	5.7676066459401e-7	ENSG00000153561	required for meiotic nuclear division 5 homolog A [Source:HGNC Symbol;Acc:HGNC:25850]	RMND5A		GO:0005634/GO:0005737/GO:0046872/GO:0016740/GO:0005515/GO:0004842/GO:0005654/GO:0006511/GO:0043161/GO:0000151/GO:0000209/GO:0034657	cellular_component/molecular_function/biological_process
ENSG00000235437	1	-1.14682	1.14682	-0.429879	0.429879	0.483221	2.43259897225043e-8
ENSG00000100316	1	-1.14678	1.14681	-0.429981	0.42995	0.367983	4.28495e-05	ENSG00000100316	ribosomal protein L3 [Source:HGNC Symbol;Acc:HGNC:10332]	RPL3		GO:0005730/GO:0005829/GO:0005622/GO:0003735/GO:0006412/GO:0005840/GO:0003723/GO:0005634/GO:0005737/GO:0005925/GO:0000027/GO:0005515/GO:0070062/GO:0032991/GO:0006413/GO:0000184/GO:0006614/GO:0022625/GO:0071353	cellular_component/molecular_function/biological_process	H7C422//G5E9G0/H7C3M2/F8WCR1/B5MCW2
ENSG00000096717	1	-1.14669	1.14671	-0.430214	0.430203	1.01656	2.58983947346849e-13	ENSG00000096717	sirtuin 1 [Source:HGNC Symbol;Acc:HGNC:14929]	SIRT1		GO:0043536/GO:0045766/GO:0007179/GO:0045599/GO:0043433/GO:2000773/GO:0045944/GO:0005737/GO:0005634/GO:0046872/GO:0005829/GO:0005654/GO:0006366/GO:0016787/GO:0006325/GO:0005739/GO:0016567/GO:0000790/GO:0000980/GO:0001077/GO:0002039/GO:0003714/GO:0017136/GO:0019213/GO:0019899/GO:0019904/GO:0033558/GO:0034979/GO:0046969/GO:0070403/GO:0000122/GO:0000720/GO:0000731/GO:0001525/GO:0001542/GO:0001678/GO:…	biological_process/cellular_component/molecular_function	B0QZ35/A0A024QZQ1/E9PC49	path:hsa04922/path:hsa01100/path:hsa04218/path:hsa00760/path:hsa04152/path:hsa04068/path:hsa05206/path:hsa05031/path:hsa04211/path:hsa04213	hsa:23411	ko:K11411	Glucagon signaling pathway - Homo sapiens (human)/Metabolic pathways - Homo sapiens (human)/Cellular senescence - Homo sapiens (human)/Nicotinate and nicotinamide metabolism - Homo sapiens (human)/AMPK signaling pathway - Homo sapiens (human)/FoxO signaling pathway - Homo sapiens (human)/MicroRNAs in cancer - Homo sapiens (human)/Amphetamine addiction - Homo sapiens (human)/Longevity regulating p…
ENSG00000116266	1	-1.14658	1.14658	0.430522	-0.430522	0.569581	3.13669e-05	ENSG00000116266	syntaxin binding protein 3 [Source:HGNC Symbol;Acc:HGNC:11446]	STXBP3		GO:0005737/GO:0016020/GO:0015031/GO:0016192/GO:0005829/GO:0005886/GO:0006904/GO:0005515/GO:0070062/GO:0019905/GO:0042581/GO:0017075/GO:0006887/GO:0007420/GO:0022615/GO:0030073/GO:0032868/GO:0043312/GO:0045955/GO:0051291/GO:0070527/GO:0071346/GO:2001274/GO:0016323/GO:0016324/GO:0031091/GO:0045335/GO:0070820/GO:0098793	cellular_component/biological_process/molecular_function
ENSG00000114026	1	-1.14603	1.14604	-0.431972	0.431963	0.972958	4.52245977440858e-9	ENSG00000114026	8-oxoguanine DNA glycosylase [Source:HGNC Symbol;Acc:HGNC:8125]	OGG1		GO:0005634/GO:0016607/GO:0005654/GO:0016787/GO:0003824/GO:0016829/GO:0005739/GO:0003684/GO:0006281/GO:0006355/GO:0016798/GO:0008152/GO:0006974/GO:0006284/GO:0006289/GO:0140078/GO:0005515/GO:0032991/GO:0008534/GO:0034039/GO:0006979/GO:0016363/GO:0007004/GO:0004519/GO:0019104/GO:0032357/GO:0006285/GO:0009314/GO:0033683/GO:0045007/GO:0045008/GO:1901291/GO:0003677/GO:0008017/GO:0002526/GO:0007568/GO:…	cellular_component/molecular_function/biological_process	H7C1V7/E5KPM8/H7C0A1/E5KPM6/E5KPM9/H7BXZ1/E5KPM7/E5KPN0/E5KPM5//H7C1D7/E5KPN1/F8WCZ9/H7BZM3	path:hsa03410	hsa:4968	ko:K03660	Base excision repair - Homo sapiens (human)
ENSG00000135469	1	-1.14602	1.14602	-0.432023	0.432023	0.409632	0.000653235	ENSG00000135469	coenzyme Q10A [Source:HGNC Symbol;Acc:HGNC:26515]	COQ10A		GO:0016020/GO:0005743/GO:0005739/GO:0048039/GO:0006744/GO:0045333/	cellular_component/molecular_function/biological_process/	H0YHF1//H0YHW3
ENSG00000143819	1	-1.14578	1.14579	-0.432636	0.432624	0.936761	7.52533422209934e-19	ENSG00000143819	epoxide hydrolase 1 [Source:HGNC Symbol;Acc:HGNC:3401]	EPHX1		/GO:0016020/GO:0016021/GO:0005783/GO:0005789/GO:0031090/GO:0043231/GO:0016787/GO:0003824/GO:0006805/GO:0009636/GO:0004301/GO:0033961/GO:0019439/GO:0097176/GO:0006725/GO:0014070	/cellular_component/molecular_function/biological_process	R4SBI6/B1AQP9/B1AQP8	path:hsa05204/path:hsa04976/path:hsa00980	hsa:2052	ko:K01253	Chemical carcinogenesis - Homo sapiens (human)/Bile secretion - Homo sapiens (human)/Metabolism of xenobiotics by cytochrome P450 - Homo sapiens (human)
ENSG00000234518	1	-1.14573	1.14572	-0.432795	0.432797	0.602704	4.12324823010029e-7
ENSG00000198393	1	-1.14538	1.14538	-0.433704	0.433704	0.797729	0.000359651	ENSG00000198393	zinc finger protein 26 [Source:HGNC Symbol;Acc:HGNC:13053]	ZNF26		GO:0003676/GO:0006355/GO:0005622/GO:0005634/GO:0046872/GO:0003677/GO:0005515/GO:0006357/GO:0000981	molecular_function/biological_process/cellular_component	V9HW07/F5H2P7/F5H6R4/F5GZ77	path:hsa05168	hsa:7574	ko:K09228	Herpes simplex virus 1 infection - Homo sapiens (human)
ENSG00000072401	1	-1.14529	1.1453	-0.433945	0.433936	1.39343	6.23042817824389e-8	ENSG00000072401	ubiquitin conjugating enzyme E2 D1 [Source:HGNC Symbol;Acc:HGNC:12474]	UBE2D1		GO:0005737/GO:0000166/GO:0005524/GO:0016740/GO:0016567/GO:0004842/GO:0061631/GO:0000209/GO:1902916/GO:0005515/GO:0006511/GO:0031625/GO:0000151/GO:0005654/GO:0005829/GO:0016579/GO:0031398/GO:0032991/GO:0006625/GO:0030509/GO:0031145/GO:0070936/GO:0000122	cellular_component/molecular_function/biological_process	A0A024QZJ2/A0A087WW00	path:hsa04141/path:hsa04120/path:hsa05131	hsa:7321	ko:K06689	Protein processing in endoplasmic reticulum - Homo sapiens (human)/Ubiquitin mediated proteolysis - Homo sapiens (human)/Shigellosis - Homo sapiens (human)
ENSG00000148634	1	-1.14482	1.14482	-0.435183	0.435183	0.892079	1.35531196313021e-17	ENSG00000148634	HECT and RLD domain containing E3 ubiquitin protein ligase 4 [Source:HGNC Symbol;Acc:HGNC:24521]	HERC4		GO:0005737/GO:0005829/GO:0016740/GO:0016567/GO:0004842/GO:0001650/GO:0030154/GO:0007283/	cellular_component/molecular_function/biological_process/	D6RCL5/D6RFK9/H0Y6K7/A0A024QZN8/
ENSG00000237988	1	-1.14459	1.14459	-0.435799	0.435799	4.68803	1.09794314092909e-13	ENSG00000237988	olfactory receptor family 2 subfamily I member 1 pseudogene [Source:HGNC Symbol;Acc:HGNC:8258]	OR2I1P		GO:0016020/GO:0016021/GO:0004930/GO:0007186/GO:0005886/GO:0007165/GO:0004984/GO:0007608/GO:0050896/GO:0050911	cellular_component/molecular_function/biological_process	A0A2R8Y4D9
ENSG00000135679	1	-1.14394	1.14394	-0.437485	0.437485	0.552293	2.29049e-05	ENSG00000135679	MDM2 proto-oncogene [Source:HGNC Symbol;Acc:HGNC:6973]	MDM2		GO:0008284/GO:0005634/GO:0005737/GO:0046872/GO:0043066/GO:0016740/GO:0016567/GO:0008270/GO:0000122/GO:0016874/GO:0005515/GO:0004842/GO:0051865/GO:0006511/GO:0071157/GO:0005654/GO:0016925/GO:0005730/GO:0005886/GO:0042802/GO:0042176/GO:0061630/GO:0006977/GO:0005829/GO:0031648/GO:0016579/GO:0032991/GO:0016032/GO:0031625/GO:0043021/GO:0043130/GO:0019899/GO:0019904/GO:0045892/GO:0019789/GO:1901796/GO:…	biological_process/cellular_component/molecular_function/	Q96DS5/Q9H4C5/A7UKX8/A0A1B0GXJ6/E7EPE2/F5GZB0/J3KN53/A7UKY0/F5H4Q8/E5RHE2/J3QST1/Q9H4C3/E7EMW5/Q8TE47/F5GZC3//Q8NDW1/F5H1M7/E5RJQ0/F5GWH7/G3XA89/A0A0C4DFR5
ENSG00000109193	1	-1.1438	1.1438	0.437872	-0.437872	1.76403	3.75547949016758e-24	ENSG00000109193	sulfotransferase family 1E member 1 [Source:HGNC Symbol;Acc:HGNC:11377]	SULT1E1		GO:0005737/GO:0005829/GO:0016740/GO:0031965/GO:0005515/GO:0008146/GO:0008289/GO:0005496/GO:0050294/GO:0050427/GO:0004062/GO:0051923/GO:0006068/GO:0008210/GO:0008202/GO:0004304/GO:0047894/GO:0006711/GO:0045600	cellular_component/molecular_function/biological_process
ENSG00000023445	1	-1.14352	1.1435	-0.438604	0.43862	0.70937	3.28378e-05	ENSG00000023445	baculoviral IAP repeat containing 3 [Source:HGNC Symbol;Acc:HGNC:591]	BIRC3		GO:0005634/GO:0005737/GO:0046872/GO:0005829/GO:0005654/GO:0016740/GO:0042981/GO:0016567/GO:0005515/GO:0004842/GO:0006915/GO:0061630/GO:0016579/GO:0031398/GO:0043123/GO:0007249/GO:0007166/GO:0043066/GO:0033209/GO:0010803/GO:0060544/GO:0050727/GO:0043027/GO:0045088/GO:2000116/GO:0070424/GO:1990001/GO:0007283/GO:0034121/GO:0038061/GO:0039535/GO:0051291/GO:0060546/GO:0032991/GO:0045121/	cellular_component/molecular_function/biological_process/	H0YCJ5/
ENSG00000241697	1	-1.14333	1.14333	-0.439076	0.439076	1.58484	3.8731981418597e-12	ENSG00000241697	transmembrane protein with EGF like and two follistatin like domains 1 [Source:HGNC Symbol;Acc:HGNC:11866]	TMEFF1		GO:0016020/GO:0016021/GO:0005886/GO:0007275	cellular_component/biological_process
ENSG00000011677	1	-1.14321	1.14322	-0.439386	0.439385	4.03242	0.00089005	ENSG00000011677	gamma-aminobutyric acid type A receptor alpha3 subunit [Source:HGNC Symbol;Acc:HGNC:4077]	GABRA3		GO:0016020/GO:0016021/GO:0005216/GO:0006811/GO:0005886/GO:0004888/GO:0030054/GO:0045202/GO:0045211/GO:0005254/GO:0006821/GO:0034707/GO:0004890/GO:0005230/GO:0007214/GO:0034220/GO:0007268/GO:0043005/GO:0007165/GO:0005887/GO:0005515/GO:1902476/GO:0042391/GO:0050877/GO:1902711/GO:0098794/GO:0005237/GO:0022851/GO:1904315/GO:0051932/GO:0060078/GO:0032590/GO:0008503/GO:0098982/GO:0099060	cellular_component/molecular_function/biological_process
ENSG00000138709	1	-1.14275	1.14275	-0.440588	0.440588	1.08974	5.95235629505502e-15	ENSG00000138709	La ribonucleoprotein domain family member 1B [Source:HGNC Symbol;Acc:HGNC:24704]	LARP1B		GO:0003723/GO:0005634/GO:0005515/	molecular_function/cellular_component/	H0Y9B4/D6RJB0/H0Y9K3//D6R9W6/G3V0E9
ENSG00000138279	1	-1.14232	1.14232	-0.441702	0.441702	0.66706	4.41913950329961e-21	ENSG00000138279	annexin A7 [Source:HGNC Symbol;Acc:HGNC:545]	ANXA7		GO:0005634/GO:0003723/GO:0016020/GO:0005509/GO:0005515/GO:0006914/GO:0005544/GO:0048306/GO:0070062/GO:0005789/GO:0005178/GO:0010629/GO:0030855/GO:0035176/GO:0042802/GO:0042584/GO:0006874/GO:0007599/GO:0008283/GO:0008360/GO:0009651/GO:0009992/GO:0014070/GO:0051592/GO:0061025/GO:0005635/GO:0005829/GO:0005886/GO:0031982	cellular_component/molecular_function/biological_process	/B9ZVT2
ENSG00000159596	1	-1.14166	1.14161	-0.443443	0.443491	0.320151	0.000776017	ENSG00000159596	transmembrane protein 69 [Source:HGNC Symbol;Acc:HGNC:28035]	TMEM69		GO:0016020/GO:0016021	cellular_component
ENSG00000102241	1	-1.14164	1.14164	0.443473	-0.443473	0.388427	2.07499e-05	ENSG00000102241	HIV-1 Tat specific factor 1 [Source:HGNC Symbol;Acc:HGNC:5276]	HTATSF1		GO:0003676/GO:0003723/GO:0005654/GO:0000398/GO:0005634/GO:0005686/GO:0006357/GO:0019079/GO:0005684/GO:0032784	molecular_function/cellular_component/biological_process	Q5H919//Q5H918
ENSG00000165417	1	-1.1415	1.1415	-0.443824	0.443824	0.33763	1.85716e-05	ENSG00000165417	general transcription factor IIA subunit 1 [Source:HGNC Symbol;Acc:HGNC:4646]	GTF2A1		GO:0005634/GO:0005829/GO:0005654/GO:0005515/GO:1903508/GO:0006367/GO:0005672/GO:0006366/GO:0046982/GO:0003713/GO:0042795/GO:0003677/GO:0008134/GO:0005669/GO:0017025/GO:0001103/GO:0005737	cellular_component/molecular_function/biological_process	/J3KNC0
ENSG00000169359	1	-1.14062	1.14057	-0.446119	0.446161	0.414086	0.000597127	ENSG00000169359	solute carrier family 33 member 1 [Source:HGNC Symbol;Acc:HGNC:95]	SLC33A1		GO:0016020/GO:0016021/GO:0005783/GO:0005789/GO:1902600/GO:0008521/GO:0015876/GO:0030509/GO:0005887/GO:0015295/GO:0055085/GO:0060395/GO:0000139	cellular_component/biological_process/molecular_function	H7C577/A0A2R8Y5I5/A0A2R8YEX5/H7C562//A0A2R8Y359/A0A2R8YF57/H7C532
ENSG00000148572	1	-1.14055	1.14055	-0.446263	0.446263	0.501358	6.90840404069355e-9	ENSG00000148572	nuclear receptor binding factor 2 [Source:HGNC Symbol;Acc:HGNC:19692]	NRBF2		GO:0005634/GO:0005737/GO:0006914/GO:0005515/GO:0031410/GO:0005654/GO:0005776/GO:0006367/GO:0035032/GO:0034976/GO:0043550	cellular_component/biological_process/molecular_function
ENSG00000177981	1	-1.13916	1.13916	-0.449795	0.449795	0.459871	2.12706e-06	ENSG00000177981	ankyrin repeat and SOCS box containing 8 [Source:HGNC Symbol;Acc:HGNC:17183]	ASB8		GO:0005737/GO:0016567/GO:0035556/GO:0005829/GO:0043687/	cellular_component/biological_process/	F5GYF0/F5GZZ3/F5H6A7/F5H023/F5H5S9/F5H772/F8VS92//F5H243/F5H7B4
ENSG00000111581	1	-1.13913	1.13916	-0.449845	0.449823	0.497872	1.63918e-05	ENSG00000111581	nucleoporin 107 [Source:HGNC Symbol;Acc:HGNC:29914]	NUP107		GO:0051028/GO:0005634/GO:0016020/GO:0015031/GO:0017056/GO:0005643/GO:0005694/GO:0005515/GO:0006406/GO:0000775/GO:0000776/GO:0000777/GO:0005829/GO:0008585/GO:0006606/GO:0016032/GO:0005635/GO:0031965/GO:0034399/GO:0051292/GO:0000973/GO:0031080//GO:0006913	biological_process/cellular_component/molecular_function/	/F5GY77/H0YG15/G3V1T4
ENSG00000165512	1	-1.13886	1.13886	-0.450544	0.450544	0.745779	2.55727439596961e-15	ENSG00000165512	zinc finger protein 22 [Source:HGNC Symbol;Acc:HGNC:13012]	ZNF22		GO:0003676/GO:0005634/GO:0046872/GO:0005654/GO:0003677/GO:0006355/GO:0006357/GO:0000981/GO:0008270/GO:0042476	molecular_function/cellular_component/biological_process	A0A024R7T4		hsa:7570
ENSG00000172671	1	-1.13886	1.13886	-0.450553	0.450553	0.97567	3.06906e-05	ENSG00000172671	zinc finger AN1-type containing 4 [Source:HGNC Symbol;Acc:HGNC:23504]	ZFAND4		GO:0008270/GO:0046872/	molecular_function/	J3KPC0/F2Z2H4/Q5VVY4/A0A024R7V9/A0A087WT56		hsa:93550	ko:K12163
ENSG00000112874	1	-1.13809	1.13809	-0.452502	0.452502	0.795036	0.000201762	ENSG00000112874	nudix hydrolase 12 [Source:HGNC Symbol;Acc:HGNC:18826]	NUDT12	00760+3.6.1.22	GO:0046872/GO:0016787/GO:0005515/GO:0005777/GO:0035529/GO:0005829/GO:0005782/GO:0005634/GO:0006734/GO:0006742/GO:0019677/GO:0034356/GO:0000210/GO:0005737	molecular_function/cellular_component/biological_process	/E7EM93
ENSG00000141027	1	-1.13787	1.13792	-0.453013	0.452966	0.288544	0.00026986	ENSG00000141027	nuclear receptor corepressor 1 [Source:HGNC Symbol;Acc:HGNC:7672]	NCOR1		GO:0005634/GO:0044212/GO:0016020/GO:0005829/GO:0005654/GO:0006325/GO:0003677/GO:0005515/GO:0000122/GO:0000981/GO:0003714/GO:0000118/GO:0045892/GO:0046329/GO:0000790/GO:0006366/GO:0007623/GO:0001102/GO:0042826/GO:0019216/GO:0051225/GO:0017053/GO:0072686/GO:0035257/GO:0016580/GO:0016922/GO:0046966/GO:0060766/GO:0072362/GO:0072368/GO:1903799/GO:2000191/	cellular_component/molecular_function/biological_process/	J3KRE4/A0A024RD47/E7EW50/E7EVK1/A0A088AWL3/J3KT44/J3KS51/J3QKP0/E7EVU5/C9JAP0/J3KS29/H0Y459//S4R380	path:hsa04919/path:hsa01522/path:hsa05202	hsa:9611	ko:K04650	Thyroid hormone signaling pathway - Homo sapiens (human)/Endocrine resistance - Homo sapiens (human)/Transcriptional misregulation in cancer - Homo sapiens (human)
ENSG00000000003	1	-1.13763	1.13763	-0.453656	0.453656	0.4579	5.05351e-05	ENSG00000000003	tetraspanin 6 [Source:HGNC Symbol;Acc:HGNC:11858]	TSPAN6		GO:0016020/GO:0016021/GO:0007166/GO:0005887/GO:0005515/GO:0070062/GO:0043123/GO:0039532/GO:1901223	cellular_component/biological_process/molecular_function	/A0A087WYV6/A0A087WZU5
ENSG00000137941	1	-1.13761	1.13761	-0.453695	0.453702	2.23406	8.48430630866868e-43	ENSG00000137941	tubulin tyrosine ligase like 7 [Source:HGNC Symbol;Acc:HGNC:26242]	TTLL7		GO:0005737/GO:0000166/GO:0005524/GO:0006464/GO:0005856/GO:0042995/GO:0016874/GO:0007275/GO:0005874/GO:0030154/GO:0030425/GO:0007399/GO:0005929/GO:0005829/GO:0043204/GO:0070740/GO:0018095/GO:0043014/GO:0048487	cellular_component/molecular_function/biological_process	A0A087X234/F2Z2J7/F2Z2X2/
ENSG00000275340	1	-1.13756	1.13756	0.453834	-0.453834	1.28676	3.50981127188051e-7
ENSG00000176399	1	-1.1375	1.1375	-0.453965	0.453965	2.22169	8.37899531681815e-12	ENSG00000176399	DMRT like family A1 [Source:HGNC Symbol;Acc:HGNC:13826]	DMRTA1		GO:0005634/GO:0046872/GO:0006355/GO:0003677/GO:0003700/GO:0043565/GO:0006357/GO:0000981/GO:0042803/GO:0001541/GO:0060179	cellular_component/molecular_function/biological_process
ENSG00000081803	1	-1.13703	1.13703	-0.455161	0.45516	3.54843	1.14924110416778e-37	ENSG00000081803	calcium dependent secretion activator 2 [Source:HGNC Symbol;Acc:HGNC:16018]	CADPS2		GO:0043231/GO:0005654/GO:0098793/GO:0016079/GO:1990504/GO:0045202/GO:0016020/GO:0015031/GO:0046872/GO:0030054/GO:0031410/GO:0030659/GO:0008289/GO:0006887/GO:0009267/GO:0016082/GO:0045921/GO:0042734/GO:0045211	cellular_component/biological_process/molecular_function	F8W8P5/X5DNG0/A0A087X1P3/H7BYR4//C9IYE1/H0Y8B5
ENSG00000072609	1	-1.13637	1.13637	-0.456808	0.456808	0.620806	2.07203057241856e-12	ENSG00000072609	checkpoint with forkhead and ring finger domains [Source:HGNC Symbol;Acc:HGNC:20455]	CHFR		GO:0005634/GO:0046872/GO:0000166/GO:0016740/GO:0016567/GO:0051301/GO:0004842/GO:0007049/GO:0005515/GO:0006511/GO:0016605/GO:0007093/GO:0000209/GO:0019941//GO:0061630/GO:0000278/GO:0031398/GO:0031648/GO:0032436	cellular_component/molecular_function/biological_process/	F5H5P5/U3KPU9/F5H375//F5H829/A0A087WUN4/F5GWH4/A0A096P6K8/A0A087X0W6
ENSG00000135404	1	-1.13618	1.13616	-0.457277	0.457295	0.606483	1.24732181768134e-10	ENSG00000135404	CD63 molecule [Source:HGNC Symbol;Acc:HGNC:1692]	CD63		GO:0016020/GO:0016021/GO:0015031/GO:0005765/GO:0005886/GO:0005515/GO:0005576/GO:0042470/GO:0005615/GO:0009986/GO:0005764/GO:0007166/GO:0005887/GO:0005768/GO:0031902/GO:0070062/GO:0016477/GO:0010008/GO:0043312/GO:0002576/GO:0031088/GO:0032585/GO:0031226/GO:0035577/GO:1900746/GO:0007160/GO:0005771/GO:0002092/GO:0034613/GO:0035646/GO:0045807/GO:0048757/GO:1901379/GO:2001046/GO:0031904/GO:0097487/GO:…	cellular_component/biological_process/molecular_function	F8VV56/F8W022/F8VX62/A0A024RB05/F8VNT9//F8VWK8	path:hsa04142/path:hsa05205	hsa:967	ko:K06497	Lysosome - Homo sapiens (human)/Proteoglycans in cancer - Homo sapiens (human)
ENSG00000179295	1	-1.13597	1.13597	-0.457802	0.457802	0.533633	6.97350041286029e-14	ENSG00000179295	protein tyrosine phosphatase non-receptor type 11 [Source:HGNC Symbol;Acc:HGNC:9644]	PTPN11		GO:0046326/GO:0005634/GO:0005737/GO:0016787/GO:0004721/GO:0006470/GO:0005515/GO:0004725/GO:0016311/GO:0016791/GO:0036092/GO:0050900/GO:0046854/GO:0005654/GO:0005829/GO:0035335/GO:0032991/GO:0070374/GO:0030168/GO:0046934/GO:0007411/GO:0019221/GO:0051897/GO:0016303/GO:0070102/GO:0007507/GO:0033628/GO:0008543/GO:0031295/GO:0048013/GO:0071364/GO:0043254/GO:0071345/GO:0007173/GO:0005158/GO:0046628/GO:…	biological_process/cellular_component/molecular_function/	A0A0U1RRI0/A0A1W2PPU4//H0YF12
ENSG00000169435	1	-1.13593	1.13593	-0.457898	0.457898	0.821895	5.72533400827039e-12	ENSG00000169435	Ras association domain family member 6 [Source:HGNC Symbol;Acc:HGNC:20796]	RASSF6		GO:0007165/GO:0042981/GO:0005515/GO:0006915	biological_process/molecular_function
ENSG00000151148	1	-1.13558	1.13555	-0.458782	0.458807	0.391965	7.69e-05	ENSG00000151148	ubiquitin protein ligase E3B [Source:HGNC Symbol;Acc:HGNC:13478]	UBE3B		GO:0016740/GO:0016567/GO:0004842/GO:0016874/GO:0061631/GO:0006511/GO:0000209/	molecular_function/biological_process/	F5H5T5/A0A024RBI2/S4R3H8/F5H6D6/	path:hsa04120	hsa:89910	ko:K10588	Ubiquitin mediated proteolysis - Homo sapiens (human)
ENSG00000123106	1	-1.13547	1.13547	-0.45903	0.45903	0.693487	2.00171697363184e-9	ENSG00000123106	coiled-coil domain containing 91 [Source:HGNC Symbol;Acc:HGNC:24855]	CCDC91		GO:0048193/GO:0005794/GO:0005654/GO:0016020/GO:0015031/GO:0005829/GO:0005802/GO:0090160/GO:0042802/	biological_process/cellular_component/molecular_function/	H0YGB4/F5H4N8/A0A024RAW6/A0A0A0MTK0/A0A0A0MTP0/F5GWB1//H0YGN9/F5GXK6/F5H3Z8/F5GWR1/H0YFR6/H0YH50/F5GZH9/H0YH48		hsa:55297
ENSG00000123096	1	-1.13449	1.13449	0.461452	-0.461452	1.03941	8.72241540301581e-8	ENSG00000123096	sarcospan [Source:HGNC Symbol;Acc:HGNC:11322]	SSPN		GO:0016020/GO:0016021/GO:0005887/GO:0016010/GO:0005886/GO:0030054/GO:0045202/GO:0045211/GO:0042383/GO:0006936/GO:0007155/GO:0030133	cellular_component/biological_process	F5H0K2/F5H381/
ENSG00000076716	1	-1.13419	1.13419	-0.462191	0.462191	7.16882	9.58370802134454e-15	ENSG00000076716	glypican 4 [Source:HGNC Symbol;Acc:HGNC:4452]	GPC4		GO:0005634/GO:0016020/GO:0005886/GO:0005576/GO:0005615/GO:0062023/GO:0009966/GO:0031225/GO:0046658/GO:0070062/GO:0060071/GO:0043202/GO:0001523/GO:0006024/GO:0006027/GO:0005796/GO:1904929/GO:0098696/GO:1905606/GO:0009897/GO:0098978/GO:0099026	cellular_component/biological_process/molecular_function
ENSG00000170745	1	-1.13407	1.13407	-0.462481	0.462481	0.624388	1.44512055162716e-9	ENSG00000170745	potassium voltage-gated channel modifier subfamily S member 3 [Source:HGNC Symbol;Acc:HGNC:6302]	KCNS3		GO:0016020/GO:0016021/GO:0005794/GO:0055085/GO:0005829/GO:0005216/GO:0006811/GO:0005886/GO:0005244/GO:0005249/GO:0005267/GO:0006813/GO:0034765/GO:0051260/GO:0071805/GO:0008076/GO:0050796/GO:0015459/GO:0005251	cellular_component/biological_process/molecular_function	C9J187/
ENSG00000170537	1	-1.1339	1.13389	-0.462896	0.462909	0.8055	2.81737546502275e-11	ENSG00000170537	transmembrane channel like 7 [Source:HGNC Symbol;Acc:HGNC:23000]	TMC7		GO:0016020/GO:0016021/GO:0005887/GO:0034220/GO:0006811/GO:0055085/GO:0005216/GO:0008381	cellular_component/biological_process/molecular_function	H3BNW8/
ENSG00000157796	1	-1.13381	1.1338	-0.463119	0.463132	0.694524	1.95371e-05	ENSG00000157796	WD repeat domain 19 [Source:HGNC Symbol;Acc:HGNC:18340]	WDR19		GO:0005737/GO:0005654/GO:0031514/GO:0005856/GO:0042995/GO:0016604/GO:0005929/GO:0035735/GO:0097542/GO:0030030/GO:0001750/GO:0032391/GO:0035721/GO:0030991/GO:0097730/GO:0000902/GO:0001701/GO:0007224/GO:0008406/GO:0030326/GO:0031076/GO:0042471/GO:0048701/GO:0050877/GO:0055123/GO:0060271/GO:0060830/GO:0060831/GO:0061055/	cellular_component/biological_process/	D6R9P6/D6RBA0/H0Y8K9/D6RAI4/D6RCF7/D6RIE4/D6RE75/
ENSG00000106025	1	-1.13373	1.13373	-0.463318	0.463318	2.40972	2.69693686698369e-18	ENSG00000106025	tetraspanin 12 [Source:HGNC Symbol;Acc:HGNC:21641]	TSPAN12		GO:0016020/GO:0016021/GO:0005886/GO:0005515/GO:0007166/GO:0010842/GO:0045765/GO:0005887/GO:0001525/GO:0016055	cellular_component/molecular_function/biological_process	C9J9U1/A0A024R740/C9JQM0/C9JC05/H7C0X9/C9IZ82		hsa:23554	ko:K17355
ENSG00000139112	1	-1.13343	1.13343	0.464047	-0.464047	0.776577	0.000281134	ENSG00000139112	GABA type A receptor associated protein like 1 [Source:HGNC Symbol;Acc:HGNC:4068]	GABARAPL1		GO:0005737/GO:0006914/GO:0016020/GO:0005783/GO:0005794/GO:0005856/GO:0005515/GO:0031410/GO:0005874/GO:0030659/GO:0032590/GO:0032839/GO:0044297/GO:0005829/GO:0000045/GO:0000422/GO:0006995/GO:0000421/GO:0031625/GO:0005776/GO:0005739/GO:0030957/GO:0048487/GO:0005622/GO:0016236/GO:0050811/GO:0097352/	cellular_component/biological_process/molecular_function/	F5GYD9/A0A024RAP5/F5GZY7/F5H007/F5GX12//A0A0G2JKT8/G3V1T7	path:hsa04137/path:hsa04140/path:hsa04727/path:hsa05131/path:hsa04371/path:hsa04068/path:hsa04621/path:hsa05167/path:hsa04136	hsa:23710	ko:K08341	Mitophagy - animal - Homo sapiens (human)/Autophagy - animal - Homo sapiens (human)/GABAergic synapse - Homo sapiens (human)/Shigellosis - Homo sapiens (human)/Apelin signaling pathway - Homo sapiens (human)/FoxO signaling pathway - Homo sapiens (human)/NOD-like receptor signaling pathway - Homo sapiens (human)/Kaposi sarcoma-associated herpesvirus infection - Homo sapiens (human)/Autophagy - oth…
ENSG00000235831	1	-1.13298	1.13298	0.465139	-0.465139	1.93769	7.07253e-05
ENSG00000075223	1	-1.13266	1.13266	-0.465912	0.465912	0.659853	1.94756e-05	ENSG00000075223	semaphorin 3C [Source:HGNC Symbol;Acc:HGNC:10725]	SEMA3C		GO:0005576/GO:0007275/GO:0030154/GO:0005615/GO:0007399/GO:0005887/GO:0070062/GO:0006955/GO:0007411/GO:0003148/GO:0030215/GO:0038191/GO:0045499/GO:0001755/GO:0030335/GO:0048843/GO:0050919/GO:0071526/GO:0042493/GO:0001756/GO:0001974/GO:0003151/GO:0003215/GO:0003350/GO:0007507/GO:0009791/GO:0021915/GO:0060174/GO:0060666/GO:0140074/GO:1905312/	cellular_component/biological_process/molecular_function/	/F2Z2Y0/F8WEP9
ENSG00000011258	1	-1.1321	1.13208	0.467305	-0.467285	0.633463	0.000513876	ENSG00000011258	mbt domain containing 1 [Source:HGNC Symbol;Acc:HGNC:19866]	MBTD1		GO:0005634/GO:0008270/GO:0046872/GO:0006355/GO:0006325/GO:0035064/GO:0048706	cellular_component/molecular_function/biological_process	/K7EQ11
ENSG00000157800	1	-1.13183	1.13183	-0.467928	0.467928	0.616756	1.30536678438221e-16	ENSG00000157800	solute carrier family 37 member 3 [Source:HGNC Symbol;Acc:HGNC:20651]	SLC37A3		GO:0016020/GO:0016021/GO:0055085/GO:0005829/GO:0005783/GO:0005789/GO:0022857/GO:0008643/GO:0030176/GO:0015712/	cellular_component/biological_process/molecular_function/	H7C4J2/C9J4S7/H7C4J3/H7C4J5/H7C4U0/H7C4U5/H7C5T4/F8WC97/H7C594/H7C4Z5/F8WAR9/C9JZ37/H7C5E7//F8WF28/H7C4I4
ENSG00000163528	1	-1.13145	1.13147	-0.468831	0.468811	0.57142	4.6950803108842e-7	ENSG00000163528	coiled-coil-helix-coiled-coil-helix domain containing 4 [Source:HGNC Symbol;Acc:HGNC:26467]	CHCHD4		GO:0005622/GO:0015031/GO:0016491/GO:0055114/GO:0005739/GO:0015035/GO:0045041/GO:0005515/GO:0005758/GO:0051084/GO:0018171/GO:0022417	cellular_component/biological_process/molecular_function	A0A024R2F8/A0A024R2I5		hsa:131474	ko:K17782
ENSG00000047315	1	-1.13072	1.13072	-0.470617	0.470617	0.360835	0.000642006	ENSG00000047315	RNA polymerase II subunit B [Source:HGNC Symbol;Acc:HGNC:9188]	POLR2B	00230+2.7.7.6/00240+2.7.7.6	GO:0006351/GO:0003899/GO:0032549/GO:0003723/GO:0005634/GO:0016020/GO:0046872/GO:0005654/GO:0016740/GO:0003677/GO:0016779/GO:0005515/GO:0006366/GO:0000784/GO:0006368/GO:0006370/GO:0006367/GO:0042795/GO:0000398/GO:0060964/GO:0006283/GO:0008543/GO:0016070/GO:0005665/GO:0003682	biological_process/molecular_function/cellular_component	C9JMN3/C9J2Y9/C9J4M6/A0A1W2PPT5/C9JZW8/
ENSG00000131370	1	-1.13027	1.1303	-0.471667	0.471643	0.501129	0.000276153	ENSG00000131370	SH3 domain binding protein 5 [Source:HGNC Symbol;Acc:HGNC:10827]	SH3BP5		GO:0005654/GO:0035556/GO:0005739/GO:0005515/GO:0016604/GO:0006469/GO:0005737/GO:0017124/GO:0007165/GO:0004860/GO:0061099//GO:0005622	cellular_component/biological_process/molecular_function/	C9JNW0/C9JK30/C9J140/A0A024R2G6/A0A024R2J3/F8WDU8
ENSG00000089022	1	-1.13012	1.1301	-0.472064	0.472088	0.445646	0.000945537	ENSG00000089022	mitogen-activated protein kinase-activated protein kinase 5 [Source:HGNC Symbol;Acc:HGNC:6889]	MAPKAPK5		GO:0005634/GO:0005737/GO:0000166/GO:0004672/GO:0004674/GO:0005524/GO:0006468/GO:0005829/GO:0005654/GO:0016740/GO:0016301/GO:0000165/GO:0016310/GO:0005515/GO:0035556/GO:0018105/GO:0007265/GO:0006417/GO:0007165/GO:1901796/GO:0032007/GO:0046777/GO:0032212/GO:0051973/GO:1904355/GO:0002039/GO:0000187/GO:0004683/GO:0051019/GO:0004708/GO:0009931/GO:0090400/	cellular_component/molecular_function/biological_process/	F8VRP2/R4GN33/R4GN93/
ENSG00000176907	1	-1.13012	1.13012	-0.472055	0.472055	4.5929	2.72098138900948e-15	ENSG00000176907	transcriptional and immune response regulator [Source:HGNC Symbol;Acc:HGNC:1357]	TCIM		GO:0005634/GO:0005737/GO:0016607/GO:0005829/GO:0005654/GO:0005886/GO:0006915/GO:0005730/GO:0005515/GO:1901224/GO:0005112/GO:0034605/GO:0043620/GO:0045746/GO:0005622/GO:0043066/GO:0002264/GO:0010739/GO:1900020/GO:1902806/GO:1903706	cellular_component/biological_process/molecular_function
ENSG00000165757	1	-1.12983	1.12983	0.472752	-0.472752	1.02913	3.84775365840279e-41	ENSG00000165757	junctional cadherin 5 associated [Source:HGNC Symbol;Acc:HGNC:29283]	JCAD		GO:0048471/GO:1903589/GO:0090050/GO:0007155/GO:0030054/GO:0005911/GO:0005912/GO:0032587/GO:1900748/GO:0043410/GO:1903672	cellular_component/biological_process
ENSG00000137207	1	-1.12979	1.12979	-0.472836	0.472836	0.262363	0.000553554	ENSG00000137207	Yip1 domain family member 3 [Source:HGNC Symbol;Acc:HGNC:21023]	YIPF3		GO:0005737/GO:0016020/GO:0016021/GO:0005794/GO:0043231/GO:0005886/GO:0005515/GO:0030154/GO:0030133/	cellular_component/molecular_function/biological_process/	D6RA04/D6RBQ1/E7EQR8/D6RAY4/H0Y9A1//D6RGY8/D6RFI3
ENSG00000089053	1	-1.12915	1.12915	-0.474365	0.474365	0.394895	2.69102e-06	ENSG00000089053	anaphase promoting complex subunit 5 [Source:HGNC Symbol;Acc:HGNC:15713]	ANAPC5		GO:0005680/GO:0005634/GO:0016567/GO:0051301/GO:0007049/GO:0070979/GO:0061630/GO:0005654/GO:0005829/GO:0031145/GO:0019903/GO:0045842/	cellular_component/biological_process/molecular_function/	F5GY68/F5H0N1/H0YFB5/F5H0F9/F5H3S5/F5GZ05/
ENSG00000265190	1	-1.12894	1.12894	-0.474855	0.474855	0.626617	3.71536387101043e-14	ENSG00000265190	annexin A8 [Source:HGNC Symbol;Acc:HGNC:546]	ANXA8		/GO:0046872/GO:0005509/GO:0005829/GO:0005886/GO:0005544/GO:0016197/GO:0031902/GO:0051015/GO:0062023/GO:0005546/GO:0005547/GO:0043325/GO:0007032/GO:0007596/GO:0007599/GO:1900138/GO:1900004	/molecular_function/cellular_component/biological_process	A0A075B765/A0A087WTN9/A0A075B748/
ENSG00000149328	1	-1.12863	1.12863	-0.475608	0.475605	0.410466	0.000634918	ENSG00000149328	galactosidase beta 1 like 2 [Source:HGNC Symbol;Acc:HGNC:25129]	GLB1L2	00600+3.2.1.23/00531+3.2.1.23/00604+3.2.1.23/00511+3.2.1.23/00052+3.2.1.23	GO:0016787/GO:0005975/GO:0005576/GO:0004553/GO:0016798/GO:0008152/GO:0004565/GO:0005773	molecular_function/biological_process/cellular_component	A0A024R3N9		hsa:89944
ENSG00000186908	1	-1.12807	1.12807	-0.476936	0.476936	0.552025	2.69379e-06	ENSG00000186908	zinc finger DHHC-type containing 17 [Source:HGNC Symbol;Acc:HGNC:18412]	ZDHHC17		GO:0016020/GO:0016021/GO:0005794/GO:0043231/GO:0016740/GO:0016746/GO:0019706/GO:0005886/GO:0005515/GO:0016235/GO:0000139/GO:0015095/GO:1903830/GO:0030054/GO:0031410/GO:0045202/GO:0030659/GO:0016409/GO:0042802/GO:0042953/GO:0043123/GO:0030660/GO:0042734/GO:0018345/	cellular_component/molecular_function/biological_process/	F8VUG7/H0YIK0/H0YHW0/H0YIN1/H0YI74/H0YIP7/F8VPW2/F8VX48//H0YHF0
ENSG00000121879	1	-1.12793	1.12793	-0.477262	0.477262	0.665287	7.16278366019005e-7	ENSG00000121879	phosphatidylinositol-4 5-bisphosphate 3-kinase catalytic subunit alpha [Source:HGNC Symbol;Acc:HGNC:8975]	PIK3CA	/05165+2.7.11.1+2.7.1.153/04150+2.7.11.1+2.7.1.153/04151+2.7.11.1+2.7.1.153/05165+2.7.1.153/04151+2.7.1.153/00562+2.7.1.153/04070+2.7.1.153/04150+2.7.1.153/04926+2.7.11.1/04714+2.7.11.1	/GO:0000166/GO:0004674/GO:0005524/GO:0016740/GO:0016301/GO:0016310/GO:0005515/GO:0016303/GO:0046854/GO:0048015/GO:0038095/GO:0038096/GO:0050900/GO:0005737/GO:0050852/GO:0006468/GO:0005886/GO:0016020/GO:0032147/GO:0035004/GO:0046934/GO:0014065/GO:0005829/GO:0007186/GO:0001525/GO:0005942/GO:0016477/GO:0030168/GO:0006909/GO:0035005/GO:0007411/GO:0019221/GO:0036092/GO:0051897/GO:0048010/GO:0038128/GO…	/molecular_function/biological_process/cellular_component	/C9J951/A0A2R8Y2F6/C9JAM9
ENSG00000069482	1	-1.12768	1.12768	-0.477846	0.477846	0.798698	1.75656455827434e-10	ENSG00000069482	galanin and GMAP prepropeptide [Source:HGNC Symbol;Acc:HGNC:4114]	GAL		GO:0010469/GO:0005576/GO:0005515/GO:0005615/GO:0005179/GO:0007218/GO:0045944/GO:0030141/GO:0007186/GO:0005184/GO:0019933/GO:0004966/GO:1902608/GO:0043025/GO:0010737/GO:0030073/GO:0031764/GO:0031765/GO:0031766/GO:0006954/GO:0007399/GO:0007631/GO:0008285/GO:0031943/GO:0032868/GO:0035902/GO:0042493/GO:0043065/GO:0043627/GO:0050672/GO:0051464/GO:0051795/GO:1902891/GO:0005737/GO:0005794	biological_process/cellular_component/molecular_function
ENSG00000047617	1	-1.12757	1.12757	-0.478099	0.478099	2.52523	0.000105432	ENSG00000047617	anoctamin 2 [Source:HGNC Symbol;Acc:HGNC:1183]	ANO2		GO:0016020/GO:0016021/GO:0005654/GO:0046983/GO:0005886/GO:0006811/GO:0005254/GO:0006821/GO:0034707/GO:1902476/GO:0005229/GO:0034220/GO:0042803/GO:0046982/GO:0097730	cellular_component/molecular_function/biological_process	F5H806//Q69YW4/F5GXT3
ENSG00000111237	1	-1.12732	1.12732	-0.478697	0.478697	0.301418	8.21323e-06	ENSG00000111237	VPS29 retromer complex component [Source:HGNC Symbol;Acc:HGNC:14340]	VPS29		GO:0005737/GO:0016020/GO:0015031/GO:0043231/GO:0046872/GO:0005829/GO:0005515/GO:0006886/GO:0042147/GO:0005768/GO:0005769/GO:0010008/GO:1990126/GO:0005770/GO:0030904/GO:0016055/GO:0030906	cellular_component/biological_process/molecular_function	F8VXU5//Q05DG7
ENSG00000166986	1	-1.12729	1.12729	0.478755	-0.478755	0.38647	3.81396196081573e-8	ENSG00000166986	methionyl-tRNA synthetase [Source:HGNC Symbol;Acc:HGNC:6898]	MARS	/00970+6.1.1.10/00450+6.1.1.10	GO:0003723/GO:0005737/GO:0016020/GO:0006412/GO:0000166/GO:0005524/GO:0005829/GO:0016874/GO:0004812/GO:0006418/GO:0000049/GO:0070062/GO:0004825/GO:0006431/GO:0017101/GO:0005730/GO:0009267/GO:0009303/GO:0032869/GO:0036120/GO:0071364/GO:1901838/	molecular_function/cellular_component/biological_process/	F8VZZ9/H0YHL6/F8VS26/H0YHV5/F8VPL7/F8W0M7/H0YIC2/H0YI94/H0YI27/F5H2V6/F8W0S4/H0YIP0/
ENSG00000181929	1	-1.12727	1.12725	-0.478822	0.478848	0.522032	1.74478e-06	ENSG00000181929	protein kinase AMP-activated non-catalytic subunit gamma 1 [Source:HGNC Symbol;Acc:HGNC:9385]	PRKAG1		GO:0032559/GO:0071900/GO:0016020/GO:0000166/GO:0005524/GO:0006629/GO:0006631/GO:0006633/GO:0005515/GO:0005654/GO:0005829/GO:0010628/GO:0006468/GO:0007165/GO:0004672/GO:0007283/GO:0045860/GO:0019901/GO:0007050/GO:0004679/GO:0016236/GO:0031588/GO:0016208/GO:0008603/GO:0004691/GO:0043531/GO:0006110/GO:0051170/GO:0005634/GO:0016301/GO:0016310/	molecular_function/biological_process/cellular_component/	A0A024R125/H0YHF8/F8VYY9/F8VVA3/F8VRY2/F8VQQ1/F8VZX1//F8W046/F8VSH3/F8VSL2/F8VYZ8/H0YIC9/F8VPF5	path:hsa04152/path:hsa04213/path:hsa04714/path:hsa04921/path:hsa04922/path:hsa05410/path:hsa04932/path:hsa04211/path:hsa04920/path:hsa04068/path:hsa04530/path:hsa04910/path:hsa04371/path:hsa04710/path:hsa04931	hsa:5571	ko:K07200	AMPK signaling pathway - Homo sapiens (human)/Longevity regulating pathway - multiple species - Homo sapiens (human)/Thermogenesis - Homo sapiens (human)/Oxytocin signaling pathway - Homo sapiens (human)/Glucagon signaling pathway - Homo sapiens (human)/Hypertrophic cardiomyopathy (HCM) - Homo sapiens (human)/Non-alcoholic fatty liver disease (NAFLD) - Homo sapiens (human)/Longevity regulating pa…
ENSG00000105204	1	-1.12706	1.12706	0.479298	-0.479298	0.785632	5.93154847460224e-8	ENSG00000105204	dual specificity tyrosine phosphorylation regulated kinase 1B [Source:HGNC Symbol;Acc:HGNC:3092]	DYRK1B		GO:0005634/GO:0000166/GO:0004672/GO:0004674/GO:0005524/GO:0006468/GO:0016740/GO:0016301/GO:0016310/GO:0004713/GO:0018108/GO:0007520/GO:0005515/GO:0003713/GO:0045893/GO:0060612/GO:0004712	cellular_component/molecular_function/biological_process	M0R131/A0A024R0I0/A0A024R0M8/A0A024R0J6/M0R2X3		hsa:9149	ko:K08825
ENSG00000089009	1	-1.12637	1.12634	-0.480957	0.480987	0.3693	2.06168734281007e-7	ENSG00000089009	ribosomal protein L6 [Source:HGNC Symbol;Acc:HGNC:10362]	RPL6		GO:0005634/GO:0003723/GO:0005737/GO:0016020/GO:0006412/GO:0002181/GO:0005783/GO:0005622/GO:0003735/GO:0005840/GO:0005829/GO:0005925/GO:0022625/GO:0000027/GO:0045296/GO:0003677/GO:0006413/GO:0036464/GO:0006355/GO:0000184/GO:0005791/GO:0006614/GO:0042788	cellular_component/molecular_function/biological_process	U3KQR5/F8VR69/F8VWR1/F8VZA3/A0A024RBK3/F8VU16/F8VZ45	path:hsa03010	hsa:6128	ko:K02934	Ribosome - Homo sapiens (human)
ENSG00000089876	1	-1.12628	1.12628	-0.481133	0.481133	0.442087	2.36528491829166e-10	ENSG00000089876	DEAH-box helicase 32 (putative) [Source:HGNC Symbol;Acc:HGNC:16717]	DHX32		GO:0004386/GO:0005634/GO:0000166/GO:0005524/GO:0016787/GO:0005739/GO:0005515/GO:0003723/GO:0034459/	molecular_function/cellular_component/	/X6R717/X6RHK1
ENSG00000156273	1	-1.12608	1.12608	0.481601	-0.481601	0.741253	6.85326993334981e-13	ENSG00000156273	BTB domain and CNC homolog 1 [Source:HGNC Symbol;Acc:HGNC:935]	BACH1		/GO:0005634/GO:0005737/GO:0006355/GO:0006366/GO:0003677/GO:0003700/GO:0005829/GO:0005515/GO:0020037/GO:0000981/GO:0000122/GO:0001078/GO:0000083/GO:0000117/GO:0006281/GO:0061418/GO:0000980/GO:0001205/GO:0001206/GO:0045944	/cellular_component/biological_process/molecular_function	C9JMP6/F8VZL7/M0QZP0/C9IYR0//C9IYH8/H7C4B6
ENSG00000176658	1	-1.12601	1.12601	-0.481759	0.481759	1.02182	7.14820853070165e-24	ENSG00000176658	myosin ID [Source:HGNC Symbol;Acc:HGNC:7598]	MYO1D		GO:0005829/GO:0000166/GO:0005524/GO:0003774/GO:0003779/GO:0016459/GO:0031410/GO:0005516/GO:0005768/GO:0030424/GO:0051015/GO:0070062/GO:0048306/GO:0016323/GO:0010923/GO:0005903/GO:0043005/GO:0019904/GO:0000146/GO:0043025/GO:0097440/GO:0030898/GO:0030900/GO:0051641/GO:0061502/GO:0005790/GO:0030673/GO:0043209/GO:0044853/	cellular_component/molecular_function/biological_process/	J3QRR2/J3KRL0//K7EIG7/J3QRN6
ENSG00000106123	1	-1.12596	1.12596	0.481877	-0.481876	1.88452	1.83467809660414e-62	ENSG00000106123	EPH receptor B6 [Source:HGNC Symbol;Acc:HGNC:3396]	EPHB6		GO:0016020/GO:0016021/GO:0000166/GO:0004672/GO:0005524/GO:0006468/GO:0005003/GO:0007169/GO:0005887/GO:0048013/GO:0001806/GO:0002456/GO:0032092/GO:0050663/GO:0050798/GO:2000525/GO:0009986/	cellular_component/molecular_function/biological_process/	F8WCM8/A0A087WYP8/A0A087WTE3/J3KQU5/A0A087WZL4	path:hsa04360	hsa:2051	ko:K05114	Axon guidance - Homo sapiens (human)
ENSG00000128513	1	-1.12594	1.12594	-0.481932	0.481932	0.497248	0.000755923	ENSG00000128513	protection of telomeres 1 [Source:HGNC Symbol;Acc:HGNC:17284]	POT1		GO:0000723/GO:0043047/GO:0005634/GO:0003677/GO:0005694/GO:0005515/GO:0000784/GO:0000781/GO:0005654/GO:0032212/GO:0051973/GO:0007004/GO:0070200/GO:0000783/GO:0042162/GO:0016233/GO:0032508/GO:0061821/GO:0061820/GO:0032210/GO:0051974/GO:0032211/GO:0098505/GO:0051096/GO:1905773/GO:0070187/GO:0017151/GO:0010521/GO:0032202/GO:1990955/GO:0060383/GO:1905774/GO:1905776	biological_process/molecular_function/cellular_component	B7Z7M5/V9GY10/Q5MJ35/V9GZ21/V9GZ00/V9GYE6/A8MTK3/C9JPG9/A0A024R739/Q5MJ33/H7C4C7/H7C0Z6/Q5MJ34		hsa:25913	ko:K11109
ENSG00000170006	1	-1.12571	1.12571	0.482463	-0.482463	0.998821	0.000246602	ENSG00000170006	transmembrane protein 154 [Source:HGNC Symbol;Acc:HGNC:26489]	TMEM154		GO:0016020/GO:0016021	cellular_component	D6R923//A0A087WZ54
ENSG00000228775	1	-1.12528	1.12528	0.483461	-0.483461	3.14207	0.000629641
ENSG00000173848	1	-1.12525	1.12525	-0.48354	0.48354	0.86805	1.58929249214897e-24	ENSG00000173848	neuroepithelial cell transforming 1 [Source:HGNC Symbol;Acc:HGNC:14592]	NET1		GO:0005634/GO:0005737/GO:0035556/GO:0005085/GO:0005089/GO:0035023/GO:0005515/GO:0043547/GO:0005829/GO:0051056/GO:0043065/GO:0007186/GO:0001558/GO:0007165/GO:0070301/GO:0071479/GO:0051451/GO:0005622	cellular_component/biological_process/molecular_function	Q5SQI7//Q5SQI6
ENSG00000226051	1	-1.12503	1.12503	-0.484045	0.484044	0.861483	0.000276031
ENSG00000123268	1	-1.1248	1.1248	0.484579	-0.484579	0.463346	7.0754e-05	ENSG00000123268	activating transcription factor 1 [Source:HGNC Symbol;Acc:HGNC:783]	ATF1		GO:0005634/GO:0005654/GO:0006355/GO:0003677/GO:0006357/GO:0003700/GO:0046982/GO:0043565//GO:0006366/GO:0005515/GO:0042802/GO:0000981/GO:0005667/GO:0001228/GO:0045944/GO:0000977/GO:0003705/GO:0044877/GO:0010976/GO:0014070/GO:0032025/GO:0034622/GO:0045740/GO:1990590	cellular_component/biological_process/molecular_function/	F8VS03/F8VRN2/F8VYN3//F8VYE5
ENSG00000005379	1	-1.12415	1.12415	-0.486089	0.486089	1.33541	0.000320759	ENSG00000005379	TSPO associated protein 1 [Source:HGNC Symbol;Acc:HGNC:16831]	TSPOAP1		GO:0030156/GO:0005737/GO:0005739/GO:0005515/GO:0005829/GO:0008150/GO:0006700	molecular_function/cellular_component/biological_process	A0A0C4DGN5//J3KT64/J3KSY4
ENSG00000257727	1	-1.12395	1.12395	-0.486558	0.486558	0.359493	0.000168861	ENSG00000257727	canopy FGF signaling regulator 2 [Source:HGNC Symbol;Acc:HGNC:13529]	CNPY2		/GO:0010629/GO:0005783/GO:0005515/GO:0010988/GO:0045716	/biological_process/cellular_component/molecular_function	H0YIH9//F8VXJ7/H0YI18/F8W1K5
ENSG00000150995	1	-1.12367	1.12367	0.487193	-0.487193	1.72051	3.71582906142354e-11	ENSG00000150995	inositol 1 4 5-trisphosphate receptor type 1 [Source:HGNC Symbol;Acc:HGNC:6180]	ITPR1		GO:0005737/GO:0016020/GO:0016021/GO:0055085/GO:0005216/GO:0006811/GO:0005783/GO:0005789/GO:0005515/GO:0007165/GO:0006915/GO:0006816/GO:0070588/GO:0048471/GO:0031410/GO:0005262/GO:0035091/GO:0070679/GO:0005886/GO:0005509/GO:0005220/GO:0048016/GO:0030168/GO:0050796/GO:0070059/GO:1903779/GO:0031095/GO:0030658/GO:0015278/GO:0051209/GO:0030659/GO:0010506/GO:0001666/GO:0016529/GO:0030667/GO:0031094/GO:…	cellular_component/biological_process/molecular_function/	B7ZMI3/
ENSG00000198040	1	-1.12324	1.12324	0.488198	-0.488198	0.828306	1.80736e-05	ENSG00000198040	zinc finger protein 84 [Source:HGNC Symbol;Acc:HGNC:13159]	ZNF84		GO:0003676/GO:0046872/GO:0006355/GO:0005622/GO:0005634/GO:0003677/GO:0008270/GO:0006357/GO:0000981/	molecular_function/biological_process/cellular_component/	F5H1B1/F5H0T0/F5H1R3//F5H630/F5H6X5/J3KQ53/F5H3F5
ENSG00000149050	1	-1.12312	1.12312	-0.488479	0.488478	1.38	0.000301979	ENSG00000149050	zinc finger protein 214 [Source:HGNC Symbol;Acc:HGNC:13006]	ZNF214		GO:0003676/GO:0005634/GO:0046872/GO:0006355/GO:0003677/GO:0005622/GO:0008270/GO:0006357/GO:0003700/GO:0000981	molecular_function/cellular_component/biological_process
ENSG00000107745	1	-1.12273	1.12273	-0.489371	0.489371	0.960469	1.21121449305848e-43	ENSG00000107745	mitochondrial calcium uptake 1 [Source:HGNC Symbol;Acc:HGNC:1530]	MICU1		GO:0005509/GO:0016020/GO:0016021/GO:0046872/GO:0005739/GO:0005743/GO:0006811/GO:0005515/GO:0006816/GO:0042802/GO:0005758/GO:0051260/GO:0005622/GO:0046982/GO:0006952/GO:0006851/GO:0051560/GO:0032592/GO:0051561/GO:0070509/GO:0034704/GO:0036444/GO:1990246	molecular_function/cellular_component/biological_process	F6XEV2/S4R3D7/A0A0U1RRK1/E9PQV6/S4R3V1//S4R3W3/A0A286YF11
ENSG00000197279	1	-1.12272	1.12272	-0.489377	0.489377	0.902533	2.13514915901282e-14	ENSG00000197279	zinc finger protein 165 [Source:HGNC Symbol;Acc:HGNC:12953]	ZNF165		GO:0003676/GO:0005634/GO:0046872/GO:0006355/GO:0003677/GO:0003700/GO:0005515/GO:0006357/GO:0000981	molecular_function/cellular_component/biological_process	Q53Z40		hsa:7718	ko:K09230
ENSG00000177613	1	-1.12268	1.12268	-0.489485	0.489485	0.65235	7.19482907213736e-13	ENSG00000177613	cleavage stimulation factor subunit 2 tau variant [Source:HGNC Symbol;Acc:HGNC:17086]	CSTF2T		GO:0003676/GO:0003723/GO:0006397/GO:0005634/GO:0005654/GO:0005515/GO:0031124/GO:0003729/GO:0098789/GO:0005847/GO:0000398/GO:0005622/GO:0006369	molecular_function/biological_process/cellular_component
ENSG00000143603	1	-1.12243	1.12243	-0.49005	0.490049	5.26905	0.000150581	ENSG00000143603	potassium calcium-activated channel subfamily N member 3 [Source:HGNC Symbol;Acc:HGNC:6292]	KCNN3		GO:0016020/GO:0016021/GO:0006813/GO:0071805/GO:0005516/GO:0015269/GO:0016286/GO:0006811/GO:0005886/GO:0043005/GO:0043025/GO:0005737	cellular_component/biological_process/molecular_function	A0A0A0MQW9/A0A087WYJ0/
ENSG00000272767	1	-1.12234	1.12234	-0.490257	0.490257	1.56786	4.00953559423771e-9
ENSG00000131477	1	-1.12223	1.12223	-0.490515	0.490515	1.18681	0.000343454	ENSG00000131477	receptor activity modifying protein 2 [Source:HGNC Symbol;Acc:HGNC:9844]	RAMP2		GO:0005622/GO:0016020/GO:0016021/GO:0006886/GO:0008565/GO:0008277/GO:0005737/GO:0015031/GO:0005886/GO:0005515/GO:0015026/GO:0001666/GO:0002040/GO:0007186/GO:0007507/GO:0007565/GO:0008217/GO:0010628/GO:0031623/GO:0032355/GO:0032570/GO:0032870/GO:0034333/GO:0035924/GO:0043116/GO:0045766/GO:0070830/GO:0070831/GO:0097084/GO:2000352/GO:2001214/GO:0006816/GO:0009986/GO:0043235/GO:0001525/GO:0005764/GO:…	cellular_component/biological_process/molecular_function/	A0A024R1Z2/K7EKQ3/K7EPN3//K7ENJ8	path:hsa04270	hsa:10266	ko:K08448	Vascular smooth muscle contraction - Homo sapiens (human)
ENSG00000111727	1	-1.12214	1.12216	-0.490694	0.490676	0.562801	1.86434457547017e-7	ENSG00000111727	host cell factor C2 [Source:HGNC Symbol;Acc:HGNC:24972]	HCFC2		GO:0005634/GO:0005737/GO:0005829/GO:0005654/GO:0005886/GO:1903508/GO:0071339/GO:0000122/GO:0003713/GO:0006357/GO:0016032	cellular_component/biological_process/molecular_function	/F8VU09
ENSG00000230989	1	-1.12194	1.12194	-0.491171	0.491171	0.453122	4.92769199714477e-9	ENSG00000230989	heat shock factor binding protein 1 [Source:HGNC Symbol;Acc:HGNC:5203]	HSBP1		GO:0005634/GO:0003714/GO:0005515/GO:0042802/GO:0005737/GO:0005829/GO:0005654/GO:0070370/GO:0000122/GO:1900034/GO:0006936/GO:0035987/GO:0005856/	cellular_component/molecular_function/biological_process/	H3BR28/
ENSG00000187325	1	-1.12057	1.12057	-0.494291	0.494291	0.550604	9.63533685161119e-9	ENSG00000187325	TATA-box binding protein associated factor 9b [Source:HGNC Symbol;Acc:HGNC:17306]	TAF9B		GO:0050821/GO:0043066/GO:0005634/GO:0046982/GO:0005515/GO:0006352/GO:0008134/GO:0045944/GO:0005654/GO:0006366/GO:0016579/GO:0005669/GO:0044212/GO:0000122/GO:0006367/GO:1901796/GO:0033276/GO:0030307/GO:0003714/GO:0036459/GO:1902166/GO:0043966/GO:0000124	biological_process/cellular_component/molecular_function
ENSG00000125730	1	-1.11988	1.11989	-0.495835	0.495825	1.09356	2.55575301846833e-27	ENSG00000125730	complement C3 [Source:HGNC Symbol;Acc:HGNC:1318]	C3		GO:0005615/GO:0005576/GO:0006629/GO:0010951/GO:0006631/GO:0005515/GO:0006508/GO:0006954/GO:0002376/GO:0045087/GO:0004252/GO:0006956/GO:0030449/GO:0050776/GO:0005886/GO:0004866/GO:0070062/GO:0001934/GO:0044267/GO:0072562/GO:0043687/GO:0007186/GO:0043312/GO:0006955/GO:0007165/GO:0006958/GO:0034774/GO:0005102/GO:0005788/GO:0035578/GO:0006957/GO:0031715/GO:0001798/GO:0001970/GO:0006911/GO:0009617/GO:…	cellular_component/biological_process/molecular_function	V9HWA9/M0QYC8/M0R1Q1/M0QXZ3/M0R0Q9	path:hsa05134/path:hsa05167/path:hsa05142/path:hsa05152/path:hsa05168/path:hsa04080/path:hsa04610/path:hsa04145/path:hsa05322/path:hsa05203/path:hsa05133/path:hsa05140/path:hsa05131/path:hsa05150	hsa:718	ko:K03990	Legionellosis - Homo sapiens (human)/Kaposi sarcoma-associated herpesvirus infection - Homo sapiens (human)/Chagas disease (American trypanosomiasis) - Homo sapiens (human)/Tuberculosis - Homo sapiens (human)/Herpes simplex virus 1 infection - Homo sapiens (human)/Neuroactive ligand-receptor interaction - Homo sapiens (human)/Complement and coagulation cascades - Homo sapiens (human)/Phagosome - …
ENSG00000164715	1	-1.11949	1.11948	-0.496739	0.496755	0.714018	6.39541796128166e-25	ENSG00000164715	lemur tyrosine kinase 2 [Source:HGNC Symbol;Acc:HGNC:17880]	LMTK2		GO:0016020/GO:0016021/GO:0005829/GO:0000166/GO:0004672/GO:0004674/GO:0005524/GO:0006468/GO:0016740/GO:0016301/GO:0016310/GO:0005794/GO:0018108/GO:0005515/GO:0032515/GO:0048471/GO:0004864/GO:0005737/GO:0005887/GO:0030154/GO:0004713/GO:0004714/GO:0004888/GO:0009968/GO:0043066/GO:0070374/GO:0043235/GO:0005769/GO:0045022/GO:0055037/GO:0046777/GO:0018107/GO:0018105/GO:0001934/GO:0032456/GO:0033572/GO:…	cellular_component/molecular_function/biological_process
ENSG00000095574	1	-1.11938	1.11939	-0.496977	0.496958	0.664831	3.97328432506684e-8	ENSG00000095574	IKAROS family zinc finger 5 [Source:HGNC Symbol;Acc:HGNC:14283]	IKZF5		GO:0003676/GO:0005634/GO:0046872/GO:0003677/GO:0003700/GO:0000981/GO:0000122/GO:0045944/GO:0005654/GO:0044212/GO:0032991/GO:0019904/GO:0008270/GO:0000977/GO:0001227/GO:0051291	molecular_function/cellular_component/biological_process
ENSG00000154274	1	-1.1192	1.1192	-0.497395	0.497395	1.96176	1.26930200538254e-58	ENSG00000154274	chromosome 4 open reading frame 19 [Source:HGNC Symbol;Acc:HGNC:25618]	C4orf19		GO:0005654/GO:0030054/GO:0005515/	cellular_component/molecular_function/	D6RFF1/A0A024R9R1
ENSG00000126746	1	-1.11919	1.11919	-0.497402	0.497402	0.315681	0.000328634	ENSG00000126746	zinc finger protein 384 [Source:HGNC Symbol;Acc:HGNC:11955]	ZNF384		GO:0003676/GO:0005634/GO:0046872/GO:0003677/GO:0006357/GO:0000981/	molecular_function/cellular_component/biological_process/	F5H0D6/R4GMR4/F5H8L7/F5H105/F5GYZ1//F5H6N8/F5H3Z9/E9PHB3
ENSG00000162896	1	-1.11846	1.11846	0.499052	-0.499052	4.48513	2.15296010865193e-9	ENSG00000162896	polymeric immunoglobulin receptor [Source:HGNC Symbol;Acc:HGNC:8968]	PIGR		GO:0016020/GO:0016021/GO:0005886/GO:0005576/GO:0005615/GO:0038093/GO:0070062/GO:0001895/GO:0043312/GO:0005887/GO:0007173/GO:0035577/GO:0043113/GO:0043235/GO:0001580/GO:0001792/GO:0002415	cellular_component/biological_process/molecular_function
ENSG00000166387	1	-1.11842	1.11842	0.499129	-0.499129	1.4743	1.14765881869709e-7	ENSG00000166387	PPFIA binding protein 2 [Source:HGNC Symbol;Acc:HGNC:9250]	PPFIBP2		/GO:0005515/GO:0005615/GO:0005829/GO:0003674/GO:0005622/GO:0042802/GO:0098793	/molecular_function/cellular_component	E9PJA0/H0YDM0/E9PP16//E9PI79/E9PK17/H0YDJ2/E9PMN3/H0YET1/E9PMH3/E9PIK8
ENSG00000139926	1	-1.1178	1.1178	-0.500534	0.500534	0.397766	1.71443e-05	ENSG00000139926	FERM domain containing 6 [Source:HGNC Symbol;Acc:HGNC:19839]	FRMD6		GO:0005737/GO:0016020/GO:0005886/GO:0005856/GO:0005515/GO:0031032/GO:0003383/GO:0032970/GO:0034613/GO:0043296/	cellular_component/molecular_function/biological_process/	G3V4T7//G3V517/H0YJ19/H0YJC1/G3V2L4/G3V3V8
ENSG00000166822	1	-1.11776	1.11776	-0.500609	0.500609	0.464385	0.000159666	ENSG00000166822	transmembrane protein 170A [Source:HGNC Symbol;Acc:HGNC:29577]	TMEM170A		GO:0005634/GO:0016020/GO:0016021/GO:0005783/GO:0005789/GO:0005515/GO:0005635/GO:0006998/GO:0071786/GO:0051292	cellular_component/molecular_function/biological_process	/H3BQT8/H3BS26/H3BRD7/B3KT46
ENSG00000108342	1	-1.11765	1.11765	-0.500854	0.500854	2.17347	0.000827126	ENSG00000108342	colony stimulating factor 3 [Source:HGNC Symbol;Acc:HGNC:2438]	CSF3		GO:0010469/GO:0005576/GO:0006955/GO:0005125/GO:0051091/GO:0051897/GO:0045944/GO:0014068/GO:0071345/GO:0008083/GO:0005615/GO:0033138/GO:0050731/GO:2000251/GO:0030838/GO:0019899/GO:0007275/GO:0019221/GO:0032092/GO:0008284/GO:0005130/GO:0030851/GO:0045639/GO:0045471/GO:0071222/GO:1901215/	biological_process/cellular_component/molecular_function/	J3QRX2/J3KTH8/Q8N4W3/Q6FH65/J3QRD4/	path:hsa04640/path:hsa04060/path:hsa04657/path:hsa04630/path:hsa04151/path:hsa05144	hsa:1440	ko:K05423	Hematopoietic cell lineage - Homo sapiens (human)/Cytokine-cytokine receptor interaction - Homo sapiens (human)/IL-17 signaling pathway - Homo sapiens (human)/JAK-STAT signaling pathway - Homo sapiens (human)/PI3K-Akt signaling pathway - Homo sapiens (human)/Malaria - Homo sapiens (human)
ENSG00000139620	1	-1.11755	1.11755	-0.501089	0.501089	0.553451	2.00473e-06	ENSG00000139620	KAT8 regulatory NSL complex subunit 2 [Source:HGNC Symbol;Acc:HGNC:26024]	KANSL2		/GO:0005634/GO:0005829/GO:0005654/GO:0006325/GO:0005886/GO:0015629/GO:0005515/GO:0000123/GO:0044545/GO:0043995/GO:0043996/GO:0046972/GO:0043981/GO:0043982/GO:0043984	/cellular_component/biological_process/molecular_function	A0A024R131/H0YID1/F8VXI8//H0YHR2/F8VP38/F8VRX7/H0YIQ8/F8VX10/H0YHH4/F8VUX5
ENSG00000087884	1	-1.11698	1.11698	-0.502346	0.502347	0.940946	2.37246394884287e-13	ENSG00000087884	adipogenesis associated Mth938 domain containing [Source:HGNC Symbol;Acc:HGNC:30205]	AAMDC		GO:0005737/GO:0005515/GO:0043066/GO:0045944/GO:0045600/	cellular_component/molecular_function/biological_process/	K4DI89/E9PIQ4//E9PR47/E9PJP1/E9PLK9/H0YF35/E9PNP3
ENSG00000157014	1	-1.1168	1.11679	-0.502766	0.502776	1.16045	6.70433460881996e-24	ENSG00000157014	TatD DNase domain containing 2 [Source:HGNC Symbol;Acc:HGNC:28988]	TATDN2		GO:0005634/GO:0016607/GO:0046872/GO:0005829/GO:0016787/GO:0090305/GO:0016788/GO:0016888/GO:0006259/GO:0004518/GO:0005654/GO:0036498	cellular_component/molecular_function/biological_process	H7BZJ2/A0A024R2F3		hsa:9797	ko:K03424
ENSG00000164684	1	-1.11677	1.11677	-0.502815	0.502815	1.88614	2.82564350733397e-12	ENSG00000164684	zinc finger protein 704 [Source:HGNC Symbol;Acc:HGNC:32291]	ZNF704		GO:0003676/GO:0005634/GO:0046872/GO:0003677/GO:0001158/GO:0006357/	molecular_function/cellular_component/biological_process/	/E5RGL7
ENSG00000129534	1	-1.11672	1.11668	-0.502944	0.502987	0.400585	7.53506e-05	ENSG00000129534	MIS18 binding protein 1 [Source:HGNC Symbol;Acc:HGNC:20190]	MIS18BP1		GO:0005634/GO:0003677/GO:0051301/GO:0005694/GO:0005515/GO:0007049/GO:0006357/GO:0000775/GO:0000981/GO:0005654/GO:0034080/GO:0000778/	cellular_component/molecular_function/biological_process/	H0YJM1/H7C1S6/G5E9K5//C9J2Q8
ENSG00000133422	1	-1.1162	1.1162	-0.504073	0.504073	0.37004	0.000840495	ENSG00000133422	MORC family CW-type zinc finger 2 [Source:HGNC Symbol;Acc:HGNC:23573]	MORC2		GO:0005634/GO:0005737/GO:0008270/GO:0046872/GO:0005829/GO:0006629/GO:0006631/	cellular_component/molecular_function/biological_process/	/H7C3M1/H7C1V1
ENSG00000170260	1	-1.11598	1.11598	-0.504572	0.504572	0.495043	1.05265336162461e-7	ENSG00000170260	zinc finger protein 212 [Source:HGNC Symbol;Acc:HGNC:13004]	ZNF212		GO:0003676/GO:0005634/GO:0046872/GO:0006355/GO:0003677/GO:0005622/GO:0008270/GO:0005515/GO:0042802/GO:0006357/GO:0000981/	molecular_function/cellular_component/biological_process/	H7C5A9/H7C589/A0A090N8N3/F2Z3G9	path:hsa05168	hsa:7988	ko:K09228	Herpes simplex virus 1 infection - Homo sapiens (human)
ENSG00000095015	1	-1.11587	1.11587	-0.504821	0.504821	0.652988	2.86392551302428e-12	ENSG00000095015	mitogen-activated protein kinase kinase kinase 1 [Source:HGNC Symbol;Acc:HGNC:6848]	MAP3K1		GO:0008270/GO:0046872/GO:0000166/GO:0004672/GO:0004674/GO:0005524/GO:0006468/GO:0016740/GO:0016301/GO:0000165/GO:0016310/GO:0005515/GO:0004709/GO:0000186/GO:0038095/GO:0005737/GO:0005829/GO:0019901/GO:0071260/GO:0002755/GO:0023014/GO:0031098/GO:0032147	molecular_function/biological_process/cellular_component
ENSG00000184752	1	-1.11572	1.11572	-0.505136	0.505136	0.36968	0.000483188	ENSG00000184752	NADH:ubiquinone oxidoreductase subunit A12 [Source:HGNC Symbol;Acc:HGNC:23987]	NDUFA12		GO:0016020/GO:0055114/GO:0005743/GO:0005739/GO:0070469/GO:0008137/GO:0009055/GO:0022900//GO:0005829/GO:0005747/GO:0006979/GO:0032981/GO:0042775/GO:0007585	cellular_component/biological_process/molecular_function/	F8VRD8/H0YID5/H0YIT1/F8VXI1/
ENSG00000121578	1	-1.11551	1.11553	0.505579	-0.505596	0.551365	8.1682e-05	ENSG00000121578	beta-1 4-galactosyltransferase 4 [Source:HGNC Symbol;Acc:HGNC:927]	B4GALT4		GO:0016020/GO:0016021/GO:0005794/GO:0046872/GO:0016740/GO:0016757/GO:0005975/GO:0006486/GO:0032580/GO:0000139/GO:0003831/GO:0008378/GO:0018146/GO:0003945/GO:0006643/	cellular_component/molecular_function/biological_process/	C9JY35/C9J644/C9J4S5//C9JA31/C9J3R8/C9JE00/C9JY38/E7ETS9/C9J5S0
ENSG00000111647	1	-1.11544	1.11544	-0.505754	0.505754	0.897114	1.44096972916998e-10	ENSG00000111647	UHRF1 binding protein 1 like [Source:HGNC Symbol;Acc:HGNC:29102]	UHRF1BP1L		/GO:0005737/GO:0005829/GO:0042803/GO:0005515/GO:0005768/GO:0044877/GO:0005769	/cellular_component/molecular_function	F8VRN3/F8W1I2/A0A0C4DGH6//F8VWX2/F8VW65/F8W665/H0YHT7
ENSG00000150977	1	-1.1151	1.11512	-0.506498	0.506477	0.522264	4.48624406846336e-8	ENSG00000150977	Rab interacting lysosomal protein like 2 [Source:HGNC Symbol;Acc:HGNC:28787]	RILPL2		GO:0005737/GO:0015031/GO:0005829/GO:0046983/GO:0005856/GO:0042995/GO:0005813/GO:0005815/GO:0042802/GO:0060271/GO:0036064/GO:0005929/GO:0051959/GO:0016020/GO:0003382/GO:0031267/GO:1903445	cellular_component/biological_process/molecular_function
ENSG00000185215	1	-1.11476	1.11477	-0.507252	0.507243	1.27375	6.3932224762707e-10	ENSG00000185215	TNF alpha induced protein 2 [Source:HGNC Symbol;Acc:HGNC:11895]	TNFAIP2		/GO:0006887/GO:0000145/GO:0007275/GO:0030154/GO:0000149/GO:0051601/GO:0001525/GO:0005615	/biological_process/cellular_component/molecular_function	H0YM45/H0YL88/H0YKR7/H0YKY9/H0YKI8//H0YLC0
ENSG00000121068	1	-1.11467	1.11467	0.507462	-0.507462	1.47115	0.00020989	ENSG00000121068	T-box 2 [Source:HGNC Symbol;Acc:HGNC:11597]	TBX2		GO:0060045/GO:0003151/GO:0005634/GO:0006355/GO:0003677/GO:0003700/GO:0000122/GO:0003007/GO:0003148/GO:0003203/GO:0003256/GO:0007219/GO:0007521/GO:0007569/GO:0035909/GO:0036302/GO:0042733/GO:0045892/GO:0048596/GO:0048738/GO:0060021/GO:0060465/GO:0060560/GO:0060596/GO:1901208/GO:1901211/GO:0005667/GO:0005515/GO:0007275/GO:0043565/GO:0000981/GO:0000978/GO:0001078/GO:0008284/GO:0090398/GO:0001947/GO:…	biological_process/cellular_component/molecular_function	F8WCM9/A0A024QZ86		hsa:6909	ko:K10176
ENSG00000176871	1	-1.11431	1.11429	-0.508252	0.508273	0.521407	3.34961000822131e-7	ENSG00000176871	WD repeat and SOCS box containing 2 [Source:HGNC Symbol;Acc:HGNC:19222]	WSB2		GO:0016567/GO:0035556/GO:0005829/GO:0043687//GO:0005622	biological_process/cellular_component/	F5GXB6//F5H280/F5H2L7/F5H024
ENSG00000176390	1	-1.1139	1.1139	-0.509136	0.509136	0.371197	9.26413e-05	ENSG00000176390	cytokine receptor like factor 3 [Source:HGNC Symbol;Acc:HGNC:17177]	CRLF3		/GO:0005737/GO:0005829/GO:0005886/GO:0005515/GO:0045893/GO:0005634/GO:0042802/GO:0003677/GO:0045944/GO:0030308/GO:0071158/GO:0000082/GO:0046427/GO:0016020/GO:0016021	/cellular_component/molecular_function/biological_process	J3QLS9//J3KST8
ENSG00000087301	1	-1.11366	1.11366	-0.509659	0.509659	0.799092	1.38188828164883e-10	ENSG00000087301	thioredoxin domain containing 16 [Source:HGNC Symbol;Acc:HGNC:19965]	TXNDC16		GO:0005783/GO:0045454/GO:0005576/GO:0005515/GO:0070062/GO:0008150/GO:0005788/GO:0005623/	cellular_component/biological_process/molecular_function/	H0YJI6//G3V2S5
ENSG00000150054	1	-1.11301	1.11301	0.511088	-0.51109	0.425345	0.00079679	ENSG00000150054	membrane palmitoylated protein 7 [Source:HGNC Symbol;Acc:HGNC:26542]	MPP7	00230+2.7.4.8/	GO:0016020/GO:0005654/GO:0009967/GO:0030054/GO:0005515/GO:0005923/GO:0045296/GO:0019904/GO:0032947/GO:0005912/GO:0046982/GO:0035591/GO:0031334/GO:0071896/GO:0070830/GO:0097025/GO:0030010/	cellular_component/biological_process/molecular_function/	U5GXS2/S4R337/
ENSG00000127952	1	-1.11268	1.11268	0.511796	-0.511796	0.510525	2.13172966385123e-11	ENSG00000127952	serine/threonine/tyrosine interacting like 1 [Source:HGNC Symbol;Acc:HGNC:18165]	STYXL1		GO:0005739/GO:0006470/GO:0016311/GO:0008138/GO:0005759/GO:0004864/GO:0005515/GO:0019903/GO:2001244/GO:0035556/GO:0010976/GO:0032515/GO:0001691/GO:2001242/GO:0062030/	cellular_component/biological_process/molecular_function/	C9J4H0/A0A024R4L1/H7C1Y2/H0Y6C4//A0A0C4DG63		hsa:51657	ko:K18047
ENSG00000101421	1	-1.11263	1.11266	-0.511886	0.511855	0.357032	1.3666e-05	ENSG00000101421	charged multivesicular body protein 4B [Source:HGNC Symbol;Acc:HGNC:16171]	CHMP4B		GO:0005634/GO:0005737/GO:0016020/GO:0015031/GO:0005829/GO:0042803/GO:0005515/GO:0007034/GO:0030496/GO:0042802/GO:0005768/GO:0031902/GO:0045296/GO:0070062/GO:0016197/GO:0016236/GO:0019058/GO:0036258/GO:0039702/GO:0051260/GO:0009898/GO:0010458/GO:0005635/GO:0000281/GO:0031982/GO:0007080/GO:0010824/GO:0006997/GO:0031468/GO:0050792/GO:0060548/GO:0061952/GO:1901673/GO:1902188/GO:0000815/GO:0030117/GO:…	cellular_component/biological_process/molecular_function
ENSG00000173597	1	-1.11225	1.11225	-0.512738	0.512738	0.60448	0.000150369	ENSG00000173597	sulfotransferase family 1B member 1 [Source:HGNC Symbol;Acc:HGNC:17845]	SULT1B1		GO:0005737/GO:0016740/GO:0006629/GO:0005829/GO:0008202/GO:0005515/GO:0008146/GO:0006805/GO:0042403/GO:0051923/GO:0050427/GO:0030855/GO:0004062/GO:0006068/GO:0006576/GO:0009812/GO:0018958	cellular_component/molecular_function/biological_process	D6RD70//D6RIA8
ENSG00000186298	1	-1.11193	1.1119	-0.513454	0.513486	0.452273	8.12965540489949e-9	ENSG00000186298	protein phosphatase 1 catalytic subunit gamma [Source:HGNC Symbol;Acc:HGNC:9283]	PPP1CC	04658+3.1.3.16/04660+3.1.3.16/	GO:0003723/GO:0005634/GO:0005737/GO:0016607/GO:0046872/GO:0016787/GO:0051301/GO:0005694/GO:0005739/GO:0004721/GO:0005515/GO:0007049/GO:0048511/GO:0005975/GO:0006470/GO:0004722/GO:0005654/GO:0005730/GO:0005925/GO:0000164/GO:0030496/GO:0000775/GO:0000776/GO:0000777/GO:0005829/GO:0019901/GO:0032154/GO:0032991/GO:0000784/GO:0005977/GO:0032922/GO:0072357/GO:0042752/GO:0043153/GO:0016791/GO:0047485/GO:…	molecular_function/cellular_component/biological_process	A0A024RBP2/A0A087WYY5/F8W1A0/F8W0W8/F8VYE8/F8W0V8/F8VR82/	path:hsa04024/path:hsa05031/path:hsa05168/path:hsa04931/path:hsa04921/path:hsa04728/path:hsa05205/path:hsa04750/path:hsa04261/path:hsa04910/path:hsa04218/path:hsa04510/path:hsa04114/path:hsa04720/path:hsa05034/path:hsa04022/path:hsa04270/path:hsa04611/path:hsa04810/path:hsa04390/path:hsa03015	hsa:5501	ko:K06269	cAMP signaling pathway - Homo sapiens (human)/Amphetamine addiction - Homo sapiens (human)/Herpes simplex virus 1 infection - Homo sapiens (human)/Insulin resistance - Homo sapiens (human)/Oxytocin signaling pathway - Homo sapiens (human)/Dopaminergic synapse - Homo sapiens (human)/Proteoglycans in cancer - Homo sapiens (human)/Inflammatory mediator regulation of TRP channels - Homo sapiens (huma…
ENSG00000084207	1	-1.11168	1.11165	-0.513995	0.514017	0.501576	2.49863853250185e-7	ENSG00000084207	glutathione S-transferase pi 1 [Source:HGNC Symbol;Acc:HGNC:4638]	GSTP1	00983+2.5.1.18/00980+2.5.1.18/00480+2.5.1.18/00982+2.5.1.18/	GO:0070373/GO:0043409/GO:0048147/GO:0043407/GO:0043508/GO:0071222/GO:0010804/GO:0070372/GO:0006469/GO:0005634/GO:0005737/GO:0005829/GO:0016740/GO:0005739/GO:0005515/GO:0005615/GO:0098869/GO:0004364/GO:0005576/GO:0006805/GO:0070062/GO:0043312/GO:0043066/GO:0032720/GO:0034774/GO:1904813/GO:0007417/GO:0031982/GO:0004602/GO:1901687/GO:0006749/GO:0032691/GO:0032930/GO:0002674/GO:2001237/GO:0051771/GO:…	biological_process/cellular_component/molecular_function/	A0A087X2E9/A0A2R8Y5E5//A8MX94/A0A087X243
ENSG00000111684	1	-1.11161	1.11161	-0.514134	0.514134	0.75036	1.05172700105422e-8	ENSG00000111684	lysophosphatidylcholine acyltransferase 3 [Source:HGNC Symbol;Acc:HGNC:30244]	LPCAT3		GO:0016020/GO:0016021/GO:0016740/GO:0005783/GO:0005789/GO:0016746/GO:0006629/GO:0008654/GO:0003841/GO:0006644/GO:0036150/GO:0036151/GO:0036152/GO:0047144/GO:0047184/GO:0097006/	cellular_component/molecular_function/biological_process/	F5H7K7/B7Z3N5//F5H680/F5GYT3/F5H0M4
ENSG00000251022	1	-1.11127	1.11127	-0.514865	0.514865	0.549434	3.05491e-05
ENSG00000064199	1	-1.11091	1.11092	-0.515625	0.515623	0.844791	3.74011722570212e-9	ENSG00000064199	sperm autoantigenic protein 17 [Source:HGNC Symbol;Acc:HGNC:11210]	SPA17		GO:0005737/GO:0016020/GO:0005515/GO:0007339/GO:0005516/GO:0007338/GO:0007283/GO:0003351/GO:0031514/GO:0097228/GO:0035686/GO:0005929/GO:0009897	cellular_component/molecular_function/biological_process	A0A172Q397		hsa:53340
ENSG00000176903	1	-1.11053	1.11053	-0.516454	0.516454	0.515636	4.180498804481e-10	ENSG00000176903	PNMA family member 1 [Source:HGNC Symbol;Acc:HGNC:9158]	PNMA1		GO:0005634/GO:0005737/GO:0005515/GO:0005730/GO:0043065/GO:0002437	cellular_component/molecular_function/biological_process
ENSG00000039560	1	-1.11014	1.11015	-0.517281	0.517272	1.25973	8.07820131726913e-72	ENSG00000039560	retinoic acid induced 14 [Source:HGNC Symbol;Acc:HGNC:14873]	RAI14		GO:0005634/GO:0005737/GO:0005829/GO:0001650/GO:0005856/GO:0030054/GO:0030154/GO:0007283/GO:0005938//GO:1901222/GO:0097190	cellular_component/biological_process/	D6RF74/D6RBW6/D6RB27/D6RB25//D6RDL2/D6R9G6/D6R9G4/D6RE17/D6RBY4/D6REL2
ENSG00000081181	1	-1.10934	1.10934	-0.519013	0.519013	0.948537	2.61787677224442e-22	ENSG00000081181	arginase 2 [Source:HGNC Symbol;Acc:HGNC:664]	ARG2	00220+3.5.3.1/00330+3.5.3.1	GO:0046872/GO:0016787/GO:0016813/GO:0005739/GO:0004053/GO:0000050/GO:0001657/GO:0002829/GO:0006525/GO:0006941/GO:0050706/GO:0071641/GO:0071644/GO:0071650/GO:1900425/GO:1903426/GO:1904468/GO:1905077/GO:1905403/GO:2000562/GO:2000666/GO:0002376/GO:0045087/GO:0002250/GO:0005737/GO:0005759/GO:0032720/GO:0006809/GO:0030145/GO:0019547/GO:2000774	molecular_function/cellular_component/biological_process	A0A024R6A0	path:hsa01230/path:hsa00220/path:hsa01100/path:hsa00330/path:hsa05146	hsa:384	ko:K01476	Biosynthesis of amino acids - Homo sapiens (human)/Arginine biosynthesis - Homo sapiens (human)/Metabolic pathways - Homo sapiens (human)/Arginine and proline metabolism - Homo sapiens (human)/Amoebiasis - Homo sapiens (human)
ENSG00000198431	1	-1.10803	1.10803	-0.521793	0.521793	0.411681	0.000349429	ENSG00000198431	thioredoxin reductase 1 [Source:HGNC Symbol;Acc:HGNC:12437]	TXNRD1	00450+1.8.1.9/	GO:0005634/GO:0005737/GO:0005654/GO:0016491/GO:0050660/GO:0055114/GO:0001650/GO:0045454/GO:0005515/GO:0015035/GO:0009055/GO:0016668/GO:0098869/GO:0022900/GO:0005739/GO:0004791/GO:0005829/GO:0070062/GO:0007165/GO:0015949/GO:0034599/GO:0019216/GO:0001887/GO:0098625/GO:0098626/GO:0001707/GO:0007369/GO:0008283//GO:0005623	cellular_component/molecular_function/biological_process/	E9PRI8/E9PLT3/E9PKD3/F8W809/E9PQI3/E9PIZ5/E9PIR7/A0A182DWI3/A0A0B4J225/A0A087WSY9/E9PKI4/E2QRB9/E9PJU2/A0A087WSW9/
ENSG00000156983	1	-1.10797	1.10797	-0.521932	0.521932	1.29496	3.35345737143189e-15	ENSG00000156983	bromodomain and PHD finger containing 1 [Source:HGNC Symbol;Acc:HGNC:14255]	BRPF1		GO:0003676/GO:0005634/GO:0005737/GO:0046872/GO:0005829/GO:0006325/GO:0003677/GO:0005886/GO:0005515/GO:0045893/GO:0005654/GO:1901796/GO:0043966/GO:0070776/GO:0043994/GO:0043972	molecular_function/cellular_component/biological_process	C9JDK5/C9JHC0/
ENSG00000092841	1	-1.10774	1.10774	-0.52242	0.52242	0.403158	0.000294605	ENSG00000092841	myosin light chain 6 [Source:HGNC Symbol;Acc:HGNC:7587]	MYL6		GO:0016020/GO:0005509/GO:0016459/GO:0005515/GO:0005829/GO:0070062/GO:0005903/GO:0031982/GO:0006936/GO:0007519/GO:0030898/GO:0030049/GO:0003774/GO:0008307/GO:0016461/	cellular_component/molecular_function/biological_process/	F8VPF3/F8VZU9/H0YI43/B7Z6Z4/G8JLA2/J3KND3/F8VXL3/G3V1Y7/G3V1V0/F8W1R7//F8W180
ENSG00000034713	1	-1.10765	1.10769	-0.52258	0.522543	0.289876	7.51392e-05	ENSG00000034713	GABA type A receptor associated protein like 2 [Source:HGNC Symbol;Acc:HGNC:13291]	GABARAPL2		GO:0005737/GO:0015031/GO:0005794/GO:0005829/GO:0005515/GO:0000139/GO:0031410/GO:0006914/GO:0006891/GO:0008017/GO:0000421/GO:0000149/GO:0000045/GO:0000422/GO:0006995/GO:0031625/GO:0005776/GO:0048487/GO:0005622/GO:0032781/GO:0016236/GO:0051117/GO:0050811/GO:0097352/GO:1901799/	cellular_component/biological_process/molecular_function/	H3BU36/H3BQ50//H3BSM5
ENSG00000057704	1	-1.10757	1.10756	-0.522771	0.522784	0.828623	1.05116e-06	ENSG00000057704	transmembrane and coiled-coil domain family 3 [Source:HGNC Symbol;Acc:HGNC:29199]	TMCC3		GO:0016020/GO:0016021/GO:0005515/	cellular_component/molecular_function/	F8VQF2/G3V207/
ENSG00000075303	1	-1.10754	1.10751	-0.522858	0.522884	0.580906	0.000542869	ENSG00000075303	solute carrier family 25 member 40 [Source:HGNC Symbol;Acc:HGNC:29680]	SLC25A40		GO:0016020/GO:0016021/GO:0055085/GO:0005743/GO:0005739/GO:0022857/	cellular_component/biological_process/molecular_function/	F8WEL8/F2Z3Q4/
ENSG00000197321	1	-1.10728	1.10728	-0.523385	0.523385	0.666953	2.1910190310897e-16	ENSG00000197321	supervillin [Source:HGNC Symbol;Acc:HGNC:11480]	SVIL		GO:0005634/GO:0005737/GO:0016020/GO:0005829/GO:0003779/GO:0051015/GO:0005886/GO:0015629/GO:0005856/GO:0042995/GO:0005515/GO:0030054/GO:0005925/GO:0030496/GO:0007010/GO:0002102/GO:0032154/GO:0071437/GO:0032467/GO:0043034/GO:0007519/GO:0036449	cellular_component/molecular_function/biological_process	A0A0J9YWY6/
ENSG00000127993	1	-1.10649	1.10651	-0.525047	0.525025	0.568213	8.45927e-06	ENSG00000127993	RNA binding motif protein 48 [Source:HGNC Symbol;Acc:HGNC:21785]	RBM48		GO:0003676/GO:0003723/GO:0005654	molecular_function/cellular_component	C9J787/
ENSG00000131368	1	-1.10635	1.10635	-0.525337	0.525337	0.545497	1.93923293614523e-8	ENSG00000131368	mitochondrial ribosomal protein S25 [Source:HGNC Symbol;Acc:HGNC:14511]	MRPS25		GO:0005739/GO:0005840/GO:0003735/GO:0005743/GO:0070125/GO:0070126/	cellular_component/molecular_function/biological_process/	E7EPW2/
ENSG00000277149	1	-1.10631	1.1063	-0.525441	0.525443	0.879296	7.07649e-05	ENSG00000277149	tRNA-yW synthesizing protein 1 homolog B [Source:HGNC Symbol;Acc:HGNC:33908]	TYW1B		GO:0016020/GO:0016021/GO:0008033/GO:0003824/GO:0051536/GO:0051539/GO:0046872/GO:0000166/GO:0055114/GO:0016829/GO:0010181/GO:0102521	cellular_component/biological_process/molecular_function	A0A087X1V1//A0A087WWV6
ENSG00000257093	1	-1.1056	1.10558	0.526957	-0.526942	0.759008	2.26806686294717e-7	ENSG00000257093	KIAA1147 [Source:HGNC Symbol;Acc:HGNC:29472]	KIAA1147				/C9J7X6
ENSG00000167244	1	-1.10534	1.10534	-0.527461	0.527464	3.07849	2.46555982317233e-125	ENSG00000167244	insulin like growth factor 2 [Source:HGNC Symbol;Acc:HGNC:5466]	IGF2		GO:0008284/GO:0051897/GO:0001934/GO:0042104/GO:0005615/GO:0008083/GO:0010469/GO:0005576/GO:0005515/GO:0005975/GO:0005179/GO:0000122/GO:0044267/GO:0006006/GO:0051781/GO:0005159/GO:0071902/GO:0001503/GO:0050731/GO:0007275/GO:0002576/GO:0005178/GO:0031093/GO:0001501/GO:0048018/GO:0001701/GO:0006355/GO:0045840/GO:0006349/GO:0043410/GO:0001892/GO:0005158/GO:0045725/GO:0046628/GO:0043539/GO:0008286/GO:…	biological_process/cellular_component/molecular_function
ENSG00000272482	1	-1.10525	1.10525	-0.527653	0.527653	1.85485	0.00017472
ENSG00000103061	1	-1.10474	1.10474	-0.528715	0.528715	0.343875	0.000172446	ENSG00000103061	solute carrier family 7 member 6 opposite strand [Source:HGNC Symbol;Acc:HGNC:25807]	SLC7A6OS		/GO:0005634/GO:0005737/GO:0015031/GO:0002244	/cellular_component/biological_process	A0A087X0P9//J3KSD3/I3L4S1
ENSG00000121957	1	-1.10371	1.10371	-0.530869	0.530869	0.658561	1.69598196405593e-12	ENSG00000121957	G protein signaling modulator 2 [Source:HGNC Symbol;Acc:HGNC:29501]	GPSM2		GO:0005737/GO:0016020/GO:0005813/GO:0000166/GO:0005829/GO:0051301/GO:0005886/GO:0001965/GO:0005092/GO:0030695/GO:0050790/GO:0097575/GO:0005856/GO:0005515/GO:0007049/GO:0000922/GO:0042802/GO:0005938/GO:0070840/GO:0032991/GO:0008022/GO:0007052/GO:0007186/GO:0016328/GO:0019904/GO:0097431/GO:0043621/GO:0000132/GO:0099738/GO:1904778/GO:0060236/GO:0031291/GO:0051661/GO:1905832/	cellular_component/molecular_function/biological_process/	A0A2R8Y896/A0A024R0F8/B0QZC9/Q5T1N9/H0Y4A4/A0A2R8Y673/A0A2R8Y6E3/A0A2R8YCX1/B0QZD0		hsa:29899	ko:K15837
ENSG00000080371	1	-1.10361	1.10361	-0.531086	0.531086	0.68444	3.43654094991294e-7	ENSG00000080371	RAB21 member RAS oncogene family [Source:HGNC Symbol;Acc:HGNC:18263]	RAB21		GO:0016020/GO:0015031/GO:0000166/GO:0005783/GO:0005789/GO:0003924/GO:0005525/GO:0005794/GO:1904115/GO:0005515/GO:0000139/GO:0031410/GO:0030659/GO:0005925/GO:0008089/GO:0030516/GO:0050775/GO:0043005/GO:0045202/GO:0006886/GO:0032580/GO:0005768/GO:0005829/GO:0070062/GO:0005802/GO:0031901/GO:0032482/GO:0032154/GO:0005769/GO:0019003/GO:0048260/GO:0009898/GO:0017157/GO:0012506/GO:2000643/GO:0098559	cellular_component/biological_process/molecular_function	A0A024RBA9		hsa:23011	ko:K07890
ENSG00000154814	1	-1.10313	1.10313	-0.532079	0.532079	0.865458	4.98896451029124e-16	ENSG00000154814	oxidoreductase NAD binding domain containing 1 [Source:HGNC Symbol;Acc:HGNC:25128]	OXNAD1		GO:0016491/GO:0055114/GO:0003674/GO:0008150/GO:0005575/	molecular_function/biological_process/cellular_component/	U3KQU8/F8WBF3//F8WB50/C9JLB7
ENSG00000228044	1	-1.10281	1.10281	-0.532732	0.532732	1.11495	9.60351135829975e-7
ENSG00000172954	1	-1.10229	1.10231	-0.533798	0.533776	0.582827	4.41713837281034e-7	ENSG00000172954	lysocardiolipin acyltransferase 1 [Source:HGNC Symbol;Acc:HGNC:26756]	LCLAT1	/00564+2.3.1.51/00561+2.3.1.51	GO:0016020/GO:0016021/GO:0016746/GO:0005783/GO:0005829/GO:0016740/GO:0005789/GO:0006629/GO:0005515/GO:0008654/GO:0007275/GO:0003841/GO:0016024/GO:0006644/GO:0006654/GO:0035965/GO:0008374/GO:0036149/	cellular_component/molecular_function/biological_process/	/C9JMW2/C9JUV9/C9J6F4/C9K0C3/C9JA02/C9JXY8/F8WEY2/C9J5S5
ENSG00000000971	1	-1.10222	1.10222	-0.533962	0.533962	3.11481	5.40954931472153e-11	ENSG00000000971	complement factor H [Source:HGNC Symbol;Acc:HGNC:4883]	CFH		GO:0005515/GO:0005576/GO:0002376/GO:0045087/GO:0030449/GO:0070062/GO:0072562/GO:0016032/GO:0005615/GO:0008201/GO:0006956/GO:0006957/GO:0043395/	molecular_function/cellular_component/biological_process/	A0A024R962/Q5TFM2/A0A0D9SG88	path:hsa04610/path:hsa05150	hsa:3075	ko:K04004	Complement and coagulation cascades - Homo sapiens (human)/Staphylococcus aureus infection - Homo sapiens (human)
ENSG00000213886	1	-1.10199	1.10199	-0.534433	0.534433	3.58755	4.09865413650215e-11	ENSG00000213886	ubiquitin D [Source:HGNC Symbol;Acc:HGNC:18795]	UBD		GO:0005634/GO:0005737/GO:0016567/GO:0001650/GO:0005515/GO:0006508/GO:0006511/GO:0034341/GO:0034612/GO:0043065/GO:0043123/GO:0005829/GO:0043687/GO:0070628/GO:0032446/GO:0043011/GO:0070842/GO:1901990/GO:0016235	cellular_component/biological_process/molecular_function	A0A1U9X8S6		hsa:10537	ko:K12157
ENSG00000007944	1	-1.10105	1.10105	-0.536357	0.536359	0.883352	2.50579e-06	ENSG00000007944	myosin regulatory light chain interacting protein [Source:HGNC Symbol;Acc:HGNC:21155]	MYLIP		GO:0005737/GO:0016020/GO:0046872/GO:0016740/GO:0016567/GO:0005886/GO:0005856/GO:0005515/GO:0008092/GO:0004842/GO:0007399/GO:0006511/GO:0061630/GO:0005829/GO:0005622/GO:0000209/GO:0010977/GO:0032802/GO:0010989/GO:0031648/GO:0032803/GO:0042632/GO:0045732	cellular_component/molecular_function/biological_process	/Q5TIA5
ENSG00000172586	1	-1.10042	1.10042	-0.537659	0.537659	0.736764	2.63945932637979e-22	ENSG00000172586	coiled-coil-helix-coiled-coil-helix domain containing 1 [Source:HGNC Symbol;Acc:HGNC:23518]	CHCHD1		GO:0005829/GO:0005654/GO:0005739/GO:0001650/GO:0005761/GO:0032543/GO:0003723/GO:0005634/GO:0005840/GO:0005515/GO:0005743/GO:0070125/GO:0070126	cellular_component/biological_process/molecular_function	/A6NJX6
ENSG00000205659	1	-1.10038	1.10038	-0.537741	0.537741	0.450742	0.00059301	ENSG00000205659	lin-52 DREAM MuvB core complex component [Source:HGNC Symbol;Acc:HGNC:19856]	LIN52		GO:0006351/GO:0005654/GO:0070176/GO:0051726	biological_process/cellular_component	/G3V5T8
ENSG00000274180	1	-1.10002	1.10002	0.538477	-0.538476	0.735727	4.89728e-05	ENSG00000274180	N-acetyltransferase domain containing 1 [Source:HGNC Symbol;Acc:HGNC:30770]	NATD1		GO:0005515	molecular_function
ENSG00000054523	1	-1.09995	1.09995	-0.538611	0.538611	0.423201	0.00019704	ENSG00000054523	kinesin family member 1B [Source:HGNC Symbol;Acc:HGNC:16636]	KIF1B		GO:0005737/GO:0000166/GO:0005524/GO:1904115/GO:0005739/GO:0003777/GO:0005856/GO:0005515/GO:0008017/GO:0006915/GO:0031410/GO:0005874/GO:0030659/GO:0007018/GO:0043005/GO:0016887/GO:0005875/GO:0030705/GO:0016192/GO:0030424/GO:0030425/GO:0005871/GO:0008089/GO:0019894/GO:0008574/GO:0007270/GO:0007274/GO:0019900/GO:0097110/GO:1990939/GO:0010628/GO:0010970/GO:0032418/GO:0047497/GO:1904647/GO:1990048/GO:…	cellular_component/molecular_function/biological_process	A0A0U1RQL3//A0A087WWA3/Q4R9M9
ENSG00000088179	1	-1.09985	1.09985	-0.538819	0.538819	0.536909	1.1569e-06	ENSG00000088179	protein tyrosine phosphatase non-receptor type 4 [Source:HGNC Symbol;Acc:HGNC:9656]	PTPN4		GO:0005737/GO:0016020/GO:0016787/GO:0005886/GO:0004721/GO:0006470/GO:0005856/GO:0005515/GO:0008092/GO:0004725/GO:0016311/GO:0035335/GO:0016791/GO:0004726/GO:0005654/GO:0009898/GO:0071345/	cellular_component/molecular_function/biological_process/	F5H020/J3QT59/J3QT41/A0A024RAE8/J3QT89/J3KQP5/J3KQD3
ENSG00000256537	1	-1.09934	1.09934	-0.539872	0.539872	0.641027	1.88540435475201e-16	ENSG00000256537	small integral membrane protein 10 like 1 [Source:HGNC Symbol;Acc:HGNC:49847]	SMIM10L1
ENSG00000141127	1	-1.09916	1.09916	-0.540236	0.540236	0.491799	1.00579526873282e-8	ENSG00000141127	phosphoribosyl pyrophosphate synthetase associated protein 2 [Source:HGNC Symbol;Acc:HGNC:9467]	PRPSAP2	00030+2.7.6.1/00230+2.7.6.1/	GO:0000287/GO:0004749/GO:0009165/GO:0009116/GO:0050790/GO:0005515/GO:0043086/GO:0005737/GO:0006139/GO:0004857/GO:0030234/GO:0006015/GO:0006164/GO:0002189/GO:0060348/	molecular_function/biological_process/cellular_component/	C9JDH0/I3L331/I3L1T1/I3L275/I3L2J4/I3L164/I3L0S1/C9JJS3/C9JDU5/E7EPA1/I3L3B8//C9K0K7/I3L4G9/A0A024QYY3/E7EW35		hsa:5636
ENSG00000164430	1	-1.09909	1.09906	-0.540389	0.540416	0.382181	0.000184996	ENSG00000164430	cyclic GMP-AMP synthase [Source:HGNC Symbol;Acc:HGNC:21367]	CGAS		GO:0005737/GO:0046872/GO:0000166/GO:0005524/GO:0016740/GO:0003677/GO:0005525/GO:0005829/GO:0006974/GO:0016779/GO:0002376/GO:0045087/GO:0051607/GO:0005515/GO:0003682/GO:0003690/GO:0043950/GO:0002218/GO:0002230/GO:0032481/GO:0071360/GO:0038001/GO:2000774/GO:0061501/GO:0010753	cellular_component/molecular_function/biological_process
ENSG00000145391	1	-1.09866	1.09866	-0.541249	0.541249	0.638027	1.10427447116713e-16	ENSG00000145391	SET domain containing lysine methyltransferase 7 [Source:HGNC Symbol;Acc:HGNC:30412]	SETD7	00310+2.1.1.43/	GO:0008168/GO:0016740/GO:0032259/GO:0006355/GO:0005694/GO:0018024/GO:0034968/GO:0005634/GO:0005730/GO:0006325/GO:0005515/GO:0018026/GO:0018027/GO:0016279/GO:0005654/GO:0002039/GO:0006974/GO:0003682/GO:0018022/GO:0045471/GO:0045893/GO:0051570/GO:0070828/	molecular_function/biological_process/cellular_component/	B5MCS2/V9GY19/V9GYG1//B5MCZ8/D6RJA0
ENSG00000264230	1	-1.09772	1.09772	-0.543142	0.543142	0.715773	1.69657708713359e-16	ENSG00000264230	annexin A8 like 1 [Source:HGNC Symbol;Acc:HGNC:23334]	ANXA8L1		GO:0005622/GO:0046872/GO:0005509/GO:0005544/GO:0016197/GO:0051015/GO:0007032/GO:0043325/GO:1900138/GO:0005546/GO:0005547/GO:1900004	cellular_component/molecular_function/biological_process	B4DTF2//A0A087WUP0/A0A075B752
ENSG00000179899	1	-1.0974	1.0974	-0.543804	0.543804	1.28641	7.01982535508289e-11
ENSG00000161791	1	-1.09734	1.09732	-0.543935	0.543951	0.636898	7.18347055209536e-11	ENSG00000161791	formin like 3 [Source:HGNC Symbol;Acc:HGNC:23698]	FMNL3		GO:0005737/GO:0016020/GO:0005794/GO:0043231/GO:0005829/GO:0003779/GO:0005886/GO:0030036/GO:0008360/GO:0007275/GO:0016477/GO:0007010/GO:0016043/GO:0017048/GO:0001525/GO:0032794	cellular_component/molecular_function/biological_process	F8VYL1//F8W1F5
ENSG00000186976	1	-1.09705	1.09705	0.544498	-0.544499	2.7423	0.000473335	ENSG00000186976	EF-hand calcium binding domain 6 [Source:HGNC Symbol;Acc:HGNC:24204]	EFCAB6		GO:0005634/GO:0046872/GO:0005654/GO:0005509	cellular_component/molecular_function	/B0QYI5
ENSG00000109436	1	-1.09673	1.09673	-0.545137	0.545137	1.20831	9.93441024425611e-14	ENSG00000109436	TBC1 domain family member 9 [Source:HGNC Symbol;Acc:HGNC:21710]	TBC1D9		GO:0005622/GO:0005509/GO:0005096/GO:0017137/GO:0006886/GO:0090630/GO:0005515	cellular_component/molecular_function/biological_process
ENSG00000108091	1	-1.09653	1.09653	-0.545541	0.545541	0.606544	5.98816175859425e-13	ENSG00000108091	coiled-coil domain containing 6 [Source:HGNC Symbol;Acc:HGNC:18782]	CCDC6		GO:0005737/GO:0005829/GO:0005856/GO:0005515/GO:0007010/GO:0008150/GO:0017124/GO:0005200	cellular_component/molecular_function/biological_process
ENSG00000086712	1	-1.09648	1.09644	-0.545673	0.545708	0.297034	0.000608188	ENSG00000086712	taxilin gamma [Source:HGNC Symbol;Acc:HGNC:18578]	TXLNG		GO:0005634/GO:0005737/GO:0016020/GO:0005829/GO:0007049/GO:0030500/GO:0031965/GO:0019905/GO:0046982/GO:0051726/GO:0010564	cellular_component/biological_process/molecular_function
ENSG00000140332	1	-1.09639	1.09639	-0.545836	0.545836	0.786143	4.09785281554721e-8	ENSG00000140332	transducin like enhancer of split 3 [Source:HGNC Symbol;Acc:HGNC:11839]	TLE3		GO:0005634/GO:0005654/GO:0006355/GO:0016055/GO:1903507/GO:0005515/GO:0090090/GO:0003714/GO:0005667/GO:0007165/GO:0120163/GO:1904837/GO:1990907/GO:0009887/GO:0070491/	cellular_component/biological_process/molecular_function/	H0YKH5/H0YKH0/H0YKN8/H0YKT5/H0YNT2/H3BUH5/F5H7D6//H0YNI7/H0YLI3/H0YLW9/Q672R2/A0A0D9SES8/H0YL70
ENSG00000228549	1	-1.09632	1.09632	-0.545964	0.545964	1.06289	6.86818e-05
ENSG00000061273	1	-1.09555	1.09553	-0.547524	0.54755	0.462429	2.29342813333465e-8	ENSG00000061273	histone deacetylase 7 [Source:HGNC Symbol;Acc:HGNC:14067]	HDAC7		GO:0090050/GO:0005634/GO:0005737/GO:0046872/GO:0005829/GO:0004407/GO:0016787/GO:0032041/GO:0006325/GO:0070932/GO:0005515/GO:0016925/GO:0005654/GO:0019901/GO:0016575/GO:0000118/GO:0019789/GO:0071889/GO:0005080/GO:1901223/GO:0045668/GO:0033613/GO:0032703/GO:0070491/GO:0003682/GO:0003714/GO:0000122/GO:0001570/GO:0007043/GO:0045892/	biological_process/cellular_component/molecular_function/	H0YHJ5/C9JGF5/C9JVZ1/F8VWY3//C9JAH2/C9JNI4/C9JF80/A0A087WYQ4/C9J102/C9JBC2/C9JH46/H0YH91/H0YI41/H0YI15/C9JKN3/C9JZ79/J3KPH8/C9JEB6
ENSG00000109466	1	-1.09462	1.0946	-0.549378	0.549401	0.578721	1.86047790177781e-11	ENSG00000109466	kelch like family member 2 [Source:HGNC Symbol;Acc:HGNC:6353]	KLHL2		GO:0005737/GO:0016567/GO:0003779/GO:0005829/GO:0005856/GO:0042995/GO:0005515/GO:0042802/GO:0030027/GO:0043687/GO:0001726/GO:0031463/GO:0015629//GO:0016020/GO:0016021	cellular_component/biological_process/molecular_function/	B4DFZ5/D6RGC3/D6R9G5/E9PEX9//D6RAP5
ENSG00000111358	1	-1.09435	1.09438	-0.549895	0.549863	0.398594	6.12155128578101e-7	ENSG00000111358	general transcription factor IIH subunit 3 [Source:HGNC Symbol;Acc:HGNC:4657]	GTF2H3		GO:0005654/GO:0006355/GO:0006289/GO:0000439/GO:0005634/GO:0046872/GO:0005515/GO:0006281/GO:0006974/GO:0006366/GO:0047485/GO:0006368/GO:0006370/GO:0006367/GO:0003700/GO:0004672/GO:0008135/GO:0006361/GO:0006363/GO:0003684/GO:0008094/GO:0006283/GO:0008353/GO:0006293/GO:0006296/GO:0033683/GO:0070911/GO:0006294/GO:0005669/GO:0005675/GO:0006412/GO:0070816/GO:0000438/GO:0097550	cellular_component/biological_process/molecular_function	F5H4K7/F5H6X0/F5GX35//F5GXG6/A0A087WYD5/F5H3G1/F5GWD3/H0YFF7
ENSG00000145495	1	-1.09392	1.09392	-0.550764	0.550764	0.617004	7.76709460126548e-20	ENSG00000145495	membrane associated ring-CH-type finger 6 [Source:HGNC Symbol;Acc:HGNC:30550]	MARCH6		GO:0016020/GO:0016021/GO:0008270/GO:0046872/GO:0005783/GO:0016740/GO:0005789/GO:0016567/GO:0005515/GO:0004842/GO:0044322/GO:0061630/GO:0030176/GO:0019899/GO:1904380/GO:0070936/GO:0030433/GO:1990381/GO:0036503/GO:0031624/GO:0010498/GO:0000835	cellular_component/molecular_function/biological_process	A0A0B4J206/D6RHY7/
ENSG00000172650	1	-1.09385	1.09385	-0.550903	0.550904	1.17285	5.22887e-06	ENSG00000172650	ArfGAP with GTPase domain ankyrin repeat and PH domain 5 [Source:HGNC Symbol;Acc:HGNC:23467]	AGAP5		GO:0046872/GO:0005096/GO:0043547/GO:0005634/	molecular_function/biological_process/cellular_component/	U3KQ60/J3KQL4/A0A0D9SFU9/
ENSG00000180818	1	-1.09374	1.09374	-0.551123	0.551123	1.04966	2.09424e-06	ENSG00000180818	homeobox C10 [Source:HGNC Symbol;Acc:HGNC:5122]	HOXC10		/GO:0005634/GO:0005654/GO:0006355/GO:0006366/GO:0003677/GO:0043565/GO:0016604/GO:0007275/GO:0000981/GO:0001228/GO:0045944/GO:0120163/GO:0000977/GO:0008284/GO:0001501/GO:0009952/GO:0009954/GO:0021520/GO:0030326/GO:0050905	/cellular_component/biological_process/molecular_function	D6RAG4/Q53XI4		hsa:3226	ko:K17444
ENSG00000114861	1	-1.09221	1.09221	-0.554154	0.554154	0.505627	3.98453e-05	ENSG00000114861	forkhead box P1 [Source:HGNC Symbol;Acc:HGNC:3823]	FOXP1		GO:0005634/GO:0046872/GO:0005654/GO:0006355/GO:0003677/GO:0003700/GO:0043565/GO:0005515/GO:0042802/GO:0000981/GO:0032496/GO:0042116/GO:0045892/GO:0010595/GO:0042118/GO:0043621/GO:0030316/GO:0048661/GO:0050681/GO:0035019/GO:0050727/GO:0060766/GO:0032680/GO:1901509/GO:0036035/GO:0042117/GO:0061470/GO:0002903/GO:0035926/GO:0045655/GO:0050706/GO:0072619/GO:1900424/GO:1901256/GO:2001182/	cellular_component/molecular_function/biological_process/	A0A087X2G3/H0Y882/G5E965/A0A087WVT2/C9IYY1/C9J5T4/C9J0F0/Q548T7/A0A0B4J2F3/	path:hsa05206	hsa:27086	ko:K23582	MicroRNAs in cancer - Homo sapiens (human)
ENSG00000170373	1	-1.09185	1.09185	-0.554863	0.554863	6.83149	1.03763649876665e-77	ENSG00000170373	cystatin SN [Source:HGNC Symbol;Acc:HGNC:2473]	CST1		GO:0010951/GO:0005515/GO:0005576/GO:0005615/GO:0004869/GO:0030414/GO:0010466/GO:0001580	biological_process/molecular_function/cellular_component
ENSG00000109265	1	-1.09143	1.09143	-0.555681	0.555682	2.32349	6.49523e-06	ENSG00000109265	KIAA1211 [Source:HGNC Symbol;Acc:HGNC:29219]	KIAA1211				A0A2R8Y6P1/A0A2R8Y5Y4/A0A1B0GWF1/F5H1N7/R4GNI9//A0A0D9SFJ2
ENSG00000182993	1	-1.09124	1.09124	-0.556057	0.556057	1.25564	1.49314131034685e-7	ENSG00000182993	chromosome 12 open reading frame 60 [Source:HGNC Symbol;Acc:HGNC:28726]	C12orf60
ENSG00000008311	1	-1.0911	1.0911	-0.556319	0.556319	1.59897	6.50322148601133e-12	ENSG00000008311	aminoadipate-semialdehyde synthase [Source:HGNC Symbol;Acc:HGNC:17366]	AASS		GO:0043231/GO:0016491/GO:0055114/GO:0005739/GO:0008152/GO:0005737/GO:0003824/GO:0006554/GO:0005759/GO:0047131/GO:0019477/GO:0051262/GO:0033512/GO:0019878/GO:0004753/GO:0047130/	cellular_component/molecular_function/biological_process/	H7C0C6/F8WE53/F8WAH1/A4D0W4	path:hsa01100/path:hsa00310	hsa:10157	ko:K14157	Metabolic pathways - Homo sapiens (human)/Lysine degradation - Homo sapiens (human)
ENSG00000133639	1	-1.09103	1.09106	0.556425	-0.556446	0.500093	4.5278e-05	ENSG00000133639	BTG anti-proliferation factor 1 [Source:HGNC Symbol;Acc:HGNC:1130]	BTG1		GO:0005634/GO:0005737/GO:0005515/GO:0006355/GO:0008285/GO:0016477/GO:0019899/GO:0030308/GO:0003712/GO:0045766/GO:0019900/GO:2000271/GO:0045930/GO:0045663/GO:0006979/GO:0007283/GO:0043434/GO:0045603	cellular_component/molecular_function/biological_process	F8W0U7/Q6IBC8	path:hsa03018	hsa:694	ko:K14443	RNA degradation - Homo sapiens (human)
ENSG00000170608	1	-1.09029	1.09029	-0.557917	0.557918	1.69065	6.22566e-06	ENSG00000170608	forkhead box A3 [Source:HGNC Symbol;Acc:HGNC:5023]	FOXA3		GO:0005634/GO:0006355/GO:0003677/GO:0003700/GO:0043565/GO:0008134/GO:0019904/GO:0005654/GO:0006325/GO:0001678/GO:0006357/GO:0007283/GO:0009267/GO:0045944/GO:0015629/GO:0007275/GO:0030154/GO:0000981/GO:0009653/GO:0044212	cellular_component/biological_process/molecular_function	M0QZW5/A0A024R0R3	path:hsa04950	hsa:3171	ko:K08038	Maturity onset diabetes of the young - Homo sapiens (human)
ENSG00000186205	1	-1.09028	1.09028	-0.557925	0.557925	0.554057	5.12539e-06	ENSG00000186205	mitochondrial amidoxime reducing component 1 [Source:HGNC Symbol;Acc:HGNC:26189]	MARC1	00790+2.8.1.9/	GO:0016020/GO:0016021/GO:0016491/GO:0055114/GO:0005739/GO:0003824/GO:0030170/GO:0005741/GO:0030151/GO:0043546/GO:0008940/GO:0042126/GO:0051410	cellular_component/molecular_function/biological_process	/H7BYZ9/X6RIL1/H0YDX4
ENSG00000162496	1	-1.09028	1.09028	-0.557927	0.557927	0.921889	9.62297e-05	ENSG00000162496	dehydrogenase/reductase 3 [Source:HGNC Symbol;Acc:HGNC:17693]	DHRS3		GO:0016020/GO:0016021/GO:0016491/GO:0055114/GO:0022900/GO:0042572/GO:0005789/GO:0004745/GO:0007601/GO:0005811/GO:0001523/GO:0009055/GO:0000166/GO:0052650/GO:0003151/GO:0030278/GO:0048387/GO:0060021/GO:0060349/GO:0060411/GO:0042622/	cellular_component/molecular_function/biological_process/	Q5SUY4/A0A087WTY3/
ENSG00000113369	1	-1.08978	1.08976	-0.558916	0.558937	0.411866	0.000938434	ENSG00000113369	arrestin domain containing 3 [Source:HGNC Symbol;Acc:HGNC:29263]	ARRDC3		GO:0005737/GO:0016020/GO:0005886/GO:0005515/GO:0005764/GO:0005768/GO:0005769/GO:0120163/GO:0051443/GO:0031699/GO:0001659/GO:0031651/GO:0043588/GO:0060613/GO:0071878/GO:0090327	cellular_component/molecular_function/biological_process
ENSG00000137648	1	-1.08931	1.08932	0.559812	-0.559819	1.44759	8.94070707256781e-30	ENSG00000137648	transmembrane serine protease 4 [Source:HGNC Symbol;Acc:HGNC:11878]	TMPRSS4		GO:0016020/GO:0016021/GO:0016787/GO:0005515/GO:0008233/GO:0006508/GO:0004252/GO:0005044/GO:0006898/GO:0008236/GO:0010468/GO:0030141/GO:0045967//GO:0009611	cellular_component/molecular_function/biological_process/	E5RJR8/G3V124/A0A087WTU6/E5RIH1/H0YAX8/E7ESG9/H0YBM5/
ENSG00000123388	1	-1.08925	1.08925	-0.559942	0.559942	0.808197	5.14170725040833e-7	ENSG00000123388	homeobox C11 [Source:HGNC Symbol;Acc:HGNC:5123]	HOXC11		GO:0005634/GO:0005829/GO:0005654/GO:0006355/GO:0006366/GO:0003677/GO:0043565/GO:0007275/GO:0000981/GO:0000978/GO:0045944/GO:0001077/GO:0001501/GO:0001656/GO:0001759/GO:0007492/GO:0009952/GO:0009954/GO:0042733/GO:0060272	cellular_component/biological_process/molecular_function	J3KMZ0/
ENSG00000162298	1	-1.08866	1.08864	-0.561095	0.561117	0.518659	3.1072e-05	ENSG00000162298	synoviolin 1 [Source:HGNC Symbol;Acc:HGNC:20738]	SYVN1		GO:0016020/GO:0016021/GO:0046872/GO:0005783/GO:0005654/GO:0016740/GO:0005789/GO:0016567/GO:0005515/GO:0061630/GO:0051082/GO:0030433/GO:0018279/GO:0006511/GO:0030970/GO:0000836/GO:1904380/GO:0050821/GO:0036498/GO:1902236/GO:0051087/GO:1990381/GO:0036503/GO:0070936/GO:0030968/GO:0030176/GO:0005790/GO:0051117/GO:0036513/GO:0000839/GO:0044322	cellular_component/molecular_function/biological_process	E9PMA1/E9PK19/H0YCR6/E9PN88/
ENSG00000055917	1	-1.08853	1.08853	-0.561344	0.561344	0.473172	1.8006e-06	ENSG00000055917	pumilio RNA binding family member 2 [Source:HGNC Symbol;Acc:HGNC:14958]	PUM2		GO:0003723/GO:0005737/GO:0005829/GO:0031965/GO:0005515/GO:0048471/GO:0006417/GO:2000637/GO:0010494/GO:0003730/GO:0010608/GO:0051983/GO:1900246/GO:0043488/GO:0035198/GO:0060964/GO:0035196/GO:0034063/	molecular_function/cellular_component/biological_process/	C9JW01/C9JE24/A0A0C4DG68//F2Z366/A0A0A0MR59/F8WD57
ENSG00000196440	1	-1.08824	1.08824	0.561899	-0.561897	0.71561	0.000208822	ENSG00000196440	armadillo repeat containing X-linked 4 [Source:HGNC Symbol;Acc:HGNC:28615]	ARMCX4		GO:0016020/GO:0016021/	cellular_component/	D6RBS8/A0A024RCH4/F8W8Y7/
ENSG00000240801	1	-1.08824	1.08824	-0.561898	0.561897	3.09324	1.63238733267883e-69
ENSG00000010244	1	-1.08681	1.08681	-0.564668	0.564668	0.315423	0.000143186	ENSG00000010244	zinc finger protein 207 [Source:HGNC Symbol;Acc:HGNC:12998]	ZNF207		GO:0003676/GO:0003723/GO:0005634/GO:0005737/GO:0046872/GO:0005730/GO:0005654/GO:0003677/GO:0003700/GO:0051301/GO:0005694/GO:0008270/GO:0005856/GO:0006355/GO:0007049/GO:0005874/GO:0008017/GO:0005819/GO:0007059/GO:0000775/GO:0000776/GO:0000777/GO:0005515/GO:0050821/GO:0001578/GO:0007094/GO:0090307/GO:0008608/GO:0008201/GO:0000070/GO:0046785/GO:0051983/GO:1990047/	molecular_function/cellular_component/biological_process/	J3KRW6//H0Y3M2/J3QRS9/J3QS27/J3KRB6/X6R4W8/J3KTL1/J3KS31
ENSG00000029153	1	-1.08637	1.08637	-0.565517	0.565517	0.511309	8.15027e-06	ENSG00000029153	aryl hydrocarbon receptor nuclear translocator like 2 [Source:HGNC Symbol;Acc:HGNC:18984]	ARNTL2		GO:0045944/GO:0005634/GO:0005737/GO:0005730/GO:0046983/GO:0006355/GO:0003677/GO:0003700/GO:0048511/GO:0005667/GO:0045893/GO:0000981/GO:0070888/GO:0042753/GO:0000978/GO:0006357/GO:0007623/GO:0009649	biological_process/cellular_component/molecular_function	H0Y5R1/
ENSG00000268686	1	-1.08628	1.08628	-0.565684	0.565684	0.766215	0.000240729
ENSG00000257218	1	-1.08534	1.08534	-0.567481	0.567481	0.28373	0.000367629	ENSG00000257218	glutamyl-tRNA amidotransferase subunit C [Source:HGNC Symbol;Acc:HGNC:25068]	GATC		GO:0006412/GO:0000166/GO:0005524/GO:0005739/GO:0016874/GO:0005515/GO:0032543/GO:0016884/GO:0050567/GO:0070681/GO:0030956/GO:0006450	biological_process/molecular_function/cellular_component	F8VRU3//J3KMY1
ENSG00000197903	1	-1.08532	1.08532	-0.567517	0.567517	0.771692	1.81211293725459e-8	ENSG00000197903	histone cluster 1 H2B family member k [Source:HGNC Symbol;Acc:HGNC:13954]	HIST1H2BK		GO:0005634/GO:0005829/GO:0005654/GO:0003677/GO:0046982/GO:0000786/GO:0005694/GO:0005615/GO:0042742/GO:0016567/GO:0003674/GO:0050829/GO:0031640/GO:0050830/GO:0061844/GO:0019731/GO:0002227/GO:0006334	cellular_component/molecular_function/biological_process	A0A024RCL8	path:hsa05322/path:hsa05203/path:hsa05034	hsa:85236	ko:K11252	Systemic lupus erythematosus - Homo sapiens (human)/Viral carcinogenesis - Homo sapiens (human)/Alcoholism - Homo sapiens (human)
ENSG00000131389	1	-1.08508	1.08508	-0.567972	0.567972	0.625633	9.86889427633733e-18	ENSG00000131389	solute carrier family 6 member 6 [Source:HGNC Symbol;Acc:HGNC:11052]	SLC6A6		/GO:0016020/GO:0016021/GO:0005887/GO:0015293/GO:0005328/GO:0006836/GO:0055085/GO:0005368/GO:0005369/GO:0015734/GO:0005886/GO:0003333/GO:0015171/GO:0006520/GO:0006865	/cellular_component/molecular_function/biological_process	A0A087WYY8/A0A087WZ59/C9JPV1/A0A087WYN0/H7C1B9/A0A087WY96/
ENSG00000142634	1	-1.08479	1.08477	0.568567	-0.568547	0.558232	7.27100277695281e-7	ENSG00000142634	EF-hand domain family member D2 [Source:HGNC Symbol;Acc:HGNC:28670]	EFHD2		GO:0016020/GO:0046872/GO:0005509/GO:0045121/GO:0045296	cellular_component/molecular_function	A0A024QZ77/H0Y4Y4		hsa:79180	ko:K23922
ENSG00000198589	1	-1.08466	1.08468	-0.568769	0.568752	0.533282	0.000915965	ENSG00000198589	LPS responsive beige-like anchor protein [Source:HGNC Symbol;Acc:HGNC:1742]	LRBA		GO:0016020/GO:0016021/GO:0005783/GO:0005794/GO:0005886/GO:0005764/GO:0003674/GO:0008150/	cellular_component/molecular_function/biological_process/	E9PEM5/H0YAC6//H0YA17/H0Y9N9
ENSG00000113430	1	-1.08463	1.08463	-0.568836	0.568836	0.70246	2.174e-05	ENSG00000113430	iroquois homeobox 4 [Source:HGNC Symbol;Acc:HGNC:6129]	IRX4		GO:0005634/GO:0006355/GO:0003677/GO:0043565/GO:0006357/GO:0000981/GO:0007507//GO:0048561	cellular_component/biological_process/molecular_function/	D6RC00//D6RAS8
ENSG00000175203	1	-1.08398	1.08398	-0.570074	0.570074	0.350373	8.08146e-06	ENSG00000175203	dynactin subunit 2 [Source:HGNC Symbol;Acc:HGNC:2712]	DCTN2		GO:0005737/GO:0016020/GO:0005813/GO:0005829/GO:0003774/GO:0005856/GO:0005515/GO:0005874/GO:0005815/GO:0007017/GO:0042802/GO:0000776/GO:0005869/GO:0030286/GO:0070062/GO:0008283/GO:0000086/GO:0010389/GO:0097711/GO:0019886/GO:0031982/GO:0006888/GO:0030507/GO:0000278/GO:0007052/GO:0019901/GO:0071539/GO:0032402/GO:0030426/	cellular_component/molecular_function/biological_process/	V9HW58/F8W0U6/F8VRV7/F8W1I6/H0YI98//F8VX93/F8VW18/H0YHL1
ENSG00000182180	1	-1.08385	1.08388	-0.570305	0.570281	0.48778	8.03796982066949e-7	ENSG00000182180	mitochondrial ribosomal protein S16 [Source:HGNC Symbol;Acc:HGNC:14048]	MRPS16		GO:0006412/GO:0005829/GO:0005739/GO:0005622/GO:0003735/GO:0005840/GO:0032543/GO:0005515/GO:0005763/GO:0005743/GO:0070125/GO:0070126	biological_process/cellular_component/molecular_function	/A6ND22
ENSG00000146083	1	-1.08372	1.08372	-0.570572	0.570572	0.597148	8.78268e-05	ENSG00000146083	ring finger protein 44 [Source:HGNC Symbol;Acc:HGNC:19180]	RNF44		GO:0046872/	molecular_function/	H0Y9W0/D6RHW8/A0A024R7Q1/D6RAW5		hsa:22838	ko:K19041
ENSG00000074695	1	-1.08299	1.08302	-0.571942	0.57191	0.376068	2.53684e-05	ENSG00000074695	lectin mannose binding 1 [Source:HGNC Symbol;Acc:HGNC:6631]	LMAN1		GO:0016020/GO:0016021/GO:0015031/GO:0005829/GO:0046872/GO:0005783/GO:0005789/GO:0030246/GO:0005794/GO:0006888/GO:0005515/GO:0005537/GO:0007029/GO:0005793/GO:0030017/GO:0030134/GO:0000139/GO:0016192/GO:0007030/GO:0070062/GO:0062023/GO:0007596/GO:0048208/GO:0012507/GO:0033116/GO:0051082/GO:0010638/GO:0006457/GO:1903215/GO:0044220	cellular_component/biological_process/molecular_function	A0A024R2A7	path:hsa04141	hsa:3998	ko:K10080	Protein processing in endoplasmic reticulum - Homo sapiens (human)
ENSG00000139719	1	-1.08288	1.08288	-0.57217	0.57217	0.443165	2.6004e-06	ENSG00000139719	VPS33A CORVET/HOPS core subunit [Source:HGNC Symbol;Acc:HGNC:18179]	VPS33A		GO:0016020/GO:0015031/GO:0016192/GO:0005765/GO:0005515/GO:0048471/GO:0031410/GO:0006914/GO:0005764/GO:0006904/GO:0005768/GO:0031902/GO:0030123/GO:0005769/GO:0008333/GO:0005770/GO:0005776/GO:0030136/GO:0032418/GO:0097352/GO:0030220/GO:0071439/GO:0030897/GO:0032400/GO:0035751/GO:0048070/	cellular_component/biological_process/molecular_function/	A0A2R8Y5U3/F5H7N5/A0A2R8YF87/F5H6Y0//F5H2X5/A0A2R8Y5F6
ENSG00000277011	1	-1.08269	1.08269	-0.572517	0.572517	2.016	7.46024369518358e-10
ENSG00000117054	1	-1.08269	1.08269	-0.57253	0.57253	0.341144	0.000497796	ENSG00000117054	acyl-CoA dehydrogenase medium chain [Source:HGNC Symbol;Acc:HGNC:89]	ACADM	00410+1.3.8.7/00071+1.3.8.7/00640+1.3.8.7/00280+1.3.8.7/	GO:0005634/GO:0016607/GO:0016491/GO:0050660/GO:0055114/GO:0016627/GO:0005739/GO:0006629/GO:0006631/GO:0005759/GO:0003995/GO:0006635/GO:0030424/GO:0070991/GO:0042802/GO:0019216/GO:0051793/GO:0019254/GO:0033539/GO:0045329/GO:0051791/GO:0031966//GO:0001889/GO:0005978/GO:0006082/GO:0006111/GO:0007507/GO:0009409/GO:0009437/GO:0009791/GO:0042594/GO:0055007	cellular_component/molecular_function/biological_process/	E9PRX4/E9PIX8/E9PJM9/Q5T4U5/H0YDT5/E9PLN7/E9PQA8/B7Z9I1/
ENSG00000160223	1	-1.08123	1.08122	-0.575275	0.575294	0.589948	3.21741e-05	ENSG00000160223	inducible T cell costimulator ligand [Source:HGNC Symbol;Acc:HGNC:17087]	ICOSLG		/GO:0016020/GO:0016021/GO:0005886/GO:0005515/GO:0007165/GO:0036464/GO:0002376/GO:0002250/GO:0009897/GO:0042802/GO:0006952/GO:0070062/GO:0005102/GO:0042113/GO:0042110/GO:0050776/GO:0050852/GO:0006972/GO:0031295/GO:0042104	/cellular_component/molecular_function/biological_process	A0A2R8Y5W7/A0N0L8/K4DIA0/	path:hsa04514/path:hsa04672	hsa:23308	ko:K06710	Cell adhesion molecules (CAMs) - Homo sapiens (human)/Intestinal immune network for IgA production - Homo sapiens (human)
ENSG00000118855	1	-1.08101	1.08101	-0.575681	0.575681	0.424926	2.00947306372033e-7	ENSG00000118855	major facilitator superfamily domain containing 1 [Source:HGNC Symbol;Acc:HGNC:25874]	MFSD1		GO:0016020/GO:0016021//GO:0055085	cellular_component//biological_process	C9JAC3/H7C5U3/H7C4F4//C9J5G6/C9JZW5/H7C593/C9JCH3/C9JBA3
ENSG00000145685	1	-1.08083	1.08085	-0.576019	0.576002	0.614695	3.35714376177397e-19	ENSG00000145685	LHFPL tetraspan subfamily member 2 [Source:HGNC Symbol;Acc:HGNC:6588]	LHFPL2		GO:0016020/GO:0016021/GO:0007338/GO:0005886/GO:0003674/GO:0008150/GO:0005575/GO:1905516/GO:0002576/GO:0031092/GO:0046545/GO:0046546	cellular_component/biological_process/molecular_function	A0A024RAM8		hsa:10184	ko:K23893
ENSG00000189171	1	-1.08028	1.08028	-0.577053	0.577053	0.581646	2.92456062091242e-18	ENSG00000189171	S100 calcium binding protein A13 [Source:HGNC Symbol;Acc:HGNC:10490]	S100A13		GO:0005634/GO:0005737/GO:0015031/GO:0046872/GO:0005730/GO:0005829/GO:0005509/GO:0005886/GO:0008270/GO:0042803/GO:0005515/GO:0005576/GO:0048471/GO:0005615/GO:0008289/GO:0005507/GO:0042629/GO:0043123/GO:0050663/GO:0043303/GO:0050786/GO:0017134/GO:0050703/GO:0008284/GO:0008360/GO:0046688/GO:0051602	cellular_component/biological_process/molecular_function
ENSG00000033030	1	-1.07913	1.07916	-0.579192	0.579163	0.386845	1.27437e-05	ENSG00000033030	zinc finger CCHC-type containing 8 [Source:HGNC Symbol;Acc:HGNC:25265]	ZCCHC8		GO:0003676/GO:0003723/GO:0006397/GO:0008380/GO:0005634/GO:0008270/GO:0046872/GO:0005654/GO:0005515/GO:0005681/GO:0016604/GO:0000398/GO:0071013/GO:0031499/	molecular_function/biological_process/cellular_component/	/F5H6J5/F5GYI9/F5GX80
ENSG00000204178	1	-1.07893	1.07893	-0.579587	0.579587	0.708545	3.86912791544559e-12	ENSG00000204178	macoilin 1 [Source:HGNC Symbol;Acc:HGNC:25572]	MACO1		GO:0003674/GO:0005634/GO:0016020/GO:0016021/GO:0005783/GO:0042995/GO:0030424/GO:0031965/GO:0030867/GO:0045202/GO:0044306/GO:0023041/GO:0007420/GO:0043005/	molecular_function/cellular_component/biological_process/
ENSG00000111639	1	-1.07886	1.07886	-0.579709	0.579709	0.622162	4.11272234252437e-17	ENSG00000111639	mitochondrial ribosomal protein L51 [Source:HGNC Symbol;Acc:HGNC:14044]	MRPL51		GO:0006412/GO:0003735/GO:0005840/GO:0005739/GO:0032543/GO:0005515/GO:0005762/GO:0005743/GO:0070125/GO:0070126/GO:0005761	biological_process/molecular_function/cellular_component	/A0A087WU28/M0R176/A0A0B4J2C1
ENSG00000168118	1	-1.07845	1.07843	-0.580486	0.580503	0.623731	1.58635287601218e-9	ENSG00000168118	RAB4A member RAS oncogene family [Source:HGNC Symbol;Acc:HGNC:9781]	RAB4A		GO:0005737/GO:0016020/GO:0015031/GO:0000166/GO:0003924/GO:0005525/GO:0005515/GO:0048471/GO:0001671/GO:0008565/GO:0019905/GO:0035255/GO:0051117/GO:0030100/GO:0032482/GO:0032781/GO:0005768/GO:0005829/GO:0005886/GO:0032593/GO:0043231/GO:0055037/GO:0098837/GO:0098993/GO:0006886/GO:0070062/GO:0031901/GO:0055038/GO:0019003/GO:0031982/GO:0006661/GO:0030659/GO:0019882	cellular_component/biological_process/molecular_function	A0A087WYT5/A0A024R3U9	path:hsa04144	hsa:5867	ko:K07879	Endocytosis - Homo sapiens (human)
ENSG00000137460	1	-1.0782	1.0782	-0.580934	0.580934	0.499866	2.6993e-05	ENSG00000137460	FH2 domain containing 1 [Source:HGNC Symbol;Acc:HGNC:29363]	FHDC1		GO:0003779/GO:0005794/GO:0005874/GO:0008017/GO:0005929/GO:0060271/GO:0090161/GO:0005881/GO:0043149	molecular_function/cellular_component/biological_process
ENSG00000198189	1	-1.07764	1.07764	-0.581965	0.581965	1.32364	9.19752279093736e-17	ENSG00000198189	hydroxysteroid 17-beta dehydrogenase 11 [Source:HGNC Symbol;Acc:HGNC:22960]	HSD17B11		GO:0016491/GO:0055114/GO:0006629/GO:0006694/GO:0005811/GO:0005576/GO:0005829/GO:0004303/GO:0006703/GO:0005737/GO:0016229/GO:0006710	molecular_function/biological_process/cellular_component	D6RCD0/
ENSG00000155561	1	-1.07757	1.07757	-0.582099	0.582099	0.413659	0.000139737	ENSG00000155561	nucleoporin 205 [Source:HGNC Symbol;Acc:HGNC:18658]	NUP205		GO:0051028/GO:0005634/GO:0016020/GO:0015031/GO:0005643/GO:0005515/GO:0017056/GO:0006406/GO:0016032/GO:0005635/GO:0031965/GO:0044611/GO:0006913/GO:0034399/GO:0051292/GO:0006999/	biological_process/cellular_component/molecular_function/	/U3KPX2/U3KQ97/U3KQ47/U3KQH5
ENSG00000132938	1	-1.07709	1.07709	0.582998	-0.582998	2.19287	0.000483536	ENSG00000132938	microtubule associated scaffold protein 2 [Source:HGNC Symbol;Acc:HGNC:20595]	MTUS2		GO:0045171/GO:0015630/GO:0005737/GO:0042803/GO:0005856/GO:0005515/GO:0005874/GO:0008017/GO:0005813/GO:0005634/GO:0005881	cellular_component/molecular_function	J3KQA9/		hsa:23281
ENSG00000198056	1	-1.07693	1.07693	-0.583283	0.583283	0.546688	7.99997e-06	ENSG00000198056	DNA primase subunit 1 [Source:HGNC Symbol;Acc:HGNC:9369]	PRIM1		GO:0003896/GO:0006269/GO:0016020/GO:0046872/GO:0016740/GO:0016779/GO:0006260/GO:0003899/GO:0005654/GO:0000082/GO:0003697/GO:0032201/GO:0005658	molecular_function/biological_process/cellular_component	F8VNY2/F8VSB2//H0YIP2
ENSG00000119711	1	-1.07638	1.07638	0.584308	-0.584308	1.09128	8.30750918714028e-16	ENSG00000119711	aldehyde dehydrogenase 6 family member A1 [Source:HGNC Symbol;Acc:HGNC:7179]	ALDH6A1	00640+1.2.1.27/00280+1.2.1.27	GO:0003723/GO:0005654/GO:0016491/GO:0055114/GO:0005739/GO:0016620/GO:0004491/GO:0050873/GO:0005759/GO:0009083/GO:0000062/GO:0006574/GO:0018478/GO:0006210/GO:0006573/GO:0019859	molecular_function/cellular_component/biological_process	A0A024R6G4/G3V4Z4/	path:hsa00562/path:hsa00280/path:hsa01100/path:hsa00410/path:hsa00640/path:hsa01200	hsa:4329	ko:K00140	Inositol phosphate metabolism - Homo sapiens (human)/Valine leucine and isoleucine degradation - Homo sapiens (human)/Metabolic pathways - Homo sapiens (human)/beta-Alanine metabolism - Homo sapiens (human)/Propanoate metabolism - Homo sapiens (human)/Carbon metabolism - Homo sapiens (human)
ENSG00000184292	1	-1.07626	1.07626	0.584518	-0.584518	0.374089	5.04539e-06	ENSG00000184292	tumor associated calcium signal transducer 2 [Source:HGNC Symbol;Acc:HGNC:11530]	TACSTD2		GO:0016020/GO:0016021/GO:0005515/GO:0050896/GO:0005615/GO:0005634/GO:0070062/GO:0007601/GO:0098609/GO:0005887/GO:0009925/GO:0016328/GO:0038023/GO:0007166/GO:0008283/GO:1900025/GO:0005829/GO:0051497/GO:0098641/GO:0010633/GO:0050678/GO:0060675/GO:0090191/GO:1900028/GO:2000146/GO:2000738/GO:0005886/GO:0005923	cellular_component/molecular_function/biological_process
ENSG00000075415	1	-1.07606	1.07606	-0.584887	0.584887	0.449816	2.06887723925739e-9	ENSG00000075415	solute carrier family 25 member 3 [Source:HGNC Symbol;Acc:HGNC:10989]	SLC25A3		GO:0016020/GO:0016021/GO:0005739/GO:0005743/GO:0015293/GO:1902600/GO:0070062/GO:0035435/GO:0005887/GO:0044877/GO:0031305/GO:0005315/GO:0015317/GO:0043209	cellular_component/molecular_function/biological_process	A0A024RBE8/F8VYH5/F8VY00/F8VWQ0/A0A024RBH9/F8VVM2/F8VWR4/F8VZL5		hsa:5250	ko:K15102
ENSG00000148719	1	-1.07604	1.07604	-0.584931	0.584931	0.598255	6.57535752184143e-8	ENSG00000148719	DnaJ heat shock protein family (Hsp40) member B12 [Source:HGNC Symbol;Acc:HGNC:14891]	DNAJB12		GO:0005634/GO:0016020/GO:0016021/GO:0005783/GO:0005789/GO:0031965/GO:0030176/GO:0030544/GO:0051085/GO:0071218/GO:0036503/GO:0034622/	cellular_component/molecular_function/biological_process/	J3KPS0//V9GY70/V9GYN7	path:hsa04141	hsa:54788	ko:K09518	Protein processing in endoplasmic reticulum - Homo sapiens (human)
ENSG00000070759	1	-1.07602	1.07602	-0.584966	0.584965	0.834372	1.8542e-05	ENSG00000070759	testis associated actin remodelling kinase 2 [Source:HGNC Symbol;Acc:HGNC:11732]	TESK2		GO:0005634/GO:0046872/GO:0000166/GO:0004672/GO:0004674/GO:0005524/GO:0006468/GO:0005654/GO:0016740/GO:0016301/GO:0016310/GO:0004713/GO:0018108/GO:0005515/GO:0016604/GO:0007283/GO:0048041/GO:0030036/GO:0004712/GO:0005737	cellular_component/molecular_function/biological_process
ENSG00000186212	1	-1.07535	1.07535	0.58619	-0.586189	1.16856	1.30148663724323e-9	ENSG00000186212	sosondowah ankyrin repeat domain family member B [Source:HGNC Symbol;Acc:HGNC:32958]	SOWAHB
ENSG00000198954	1	-1.07534	1.07536	-0.586206	0.586185	0.539366	1.72528169970019e-7	ENSG00000198954	KIF1 binding protein [Source:HGNC Symbol;Acc:HGNC:23419]	KIF1BP		/GO:0005737/GO:0005739/GO:0005856/GO:0005515/GO:0007275/GO:0030154/GO:0007399/GO:0019894/GO:0006839	/cellular_component/molecular_function/biological_process	A0A1B0GUA3//A0A0D9SFK7/A0A1B0GW21/A0A1B0GUH6/A0A1B0GTE2/A0A1B0GV79/A0A1B0GVY9/A0A1B0GU96/A0A1B0GTE6/A0A1B0GTX3
ENSG00000205765	1	-1.07519	1.07519	-0.586485	0.586485	0.55031	0.00083681	ENSG00000205765	chromosome 5 open reading frame 51 [Source:HGNC Symbol;Acc:HGNC:27750]	C5orf51		GO:0005829/GO:0005654	cellular_component	A0A0C4DGW6/
ENSG00000134072	1	-1.07485	1.07485	-0.587113	0.587113	0.950053	2.97791e-06	ENSG00000134072	calcium/calmodulin dependent protein kinase I [Source:HGNC Symbol;Acc:HGNC:1459]	CAMK1		GO:0005622/GO:0005634/GO:0005737/GO:0000166/GO:0004672/GO:0004674/GO:0005524/GO:0006468/GO:0016740/GO:0016301/GO:0016310/GO:0008152/GO:0007049/GO:0007275/GO:0030154/GO:0005516/GO:0007399/GO:0003824/GO:0005515/GO:0045944/GO:0033138/GO:0071902/GO:0004683/GO:0006913/GO:0007165/GO:0046827/GO:0050807/GO:0014069/GO:0098978/GO:1901985/GO:0032091/GO:0010976/GO:0032880/GO:0060999/GO:0060143/GO:0051147/GO:…	cellular_component/molecular_function/biological_process/	B0YIY3/C9JES6/F8W6S9/H7C071	path:hsa05214/path:hsa04921/path:hsa04020/path:hsa04925	hsa:8536	ko:K08794	Glioma - Homo sapiens (human)/Oxytocin signaling pathway - Homo sapiens (human)/Calcium signaling pathway - Homo sapiens (human)/Aldosterone synthesis and secretion - Homo sapiens (human)
ENSG00000129562	1	-1.07451	1.07451	-0.587727	0.587727	0.389146	1.20619493585494e-7	ENSG00000129562	defender against cell death 1 [Source:HGNC Symbol;Acc:HGNC:2664]	DAD1		GO:0016020/GO:0016021/GO:0005783/GO:0005789/GO:0006915/GO:0006486/GO:0004579/GO:0008250/GO:0043066/GO:0006487/GO:0018279/GO:0004576/GO:0001824/GO:0007584/GO:0042493/GO:0016740	cellular_component/biological_process/molecular_function	A0A0B4J239/F5H895/F5GXX5/
ENSG00000166860	1	-1.07405	1.07405	-0.588563	0.588563	0.497204	4.95564e-06	ENSG00000166860	zinc finger and BTB domain containing 39 [Source:HGNC Symbol;Acc:HGNC:29014]	ZBTB39		GO:0003676/GO:0005634/GO:0046872/GO:0003677/GO:0006357/GO:0000981	molecular_function/cellular_component/biological_process
ENSG00000008277	1	-1.07402	1.07402	-0.588618	0.588618	2.2965	5.06372771707633e-24	ENSG00000008277	ADAM metallopeptidase domain 22 [Source:HGNC Symbol;Acc:HGNC:201]	ADAM22		GO:0016020/GO:0016021/GO:0007155/GO:0005886/GO:0042995/GO:0005515/GO:0006508/GO:0004222/GO:0008237/GO:0030424/GO:0005178/GO:0007417/GO:0007162//GO:0008344/GO:0014037/GO:0022011/GO:0042063	cellular_component/biological_process/molecular_function/	/E9PF78/H7C0Q9/F8WAD8/E7EPF1/H7C3I4
ENSG00000151491	1	-1.07399	1.074	-0.588674	0.588665	1.26398	5.6562449756692e-18	ENSG00000151491	epidermal growth factor receptor pathway substrate 8 [Source:HGNC Symbol;Acc:HGNC:3420]	EPS8		GO:0003779/GO:0035591/GO:0009967/GO:0051016/GO:0051017/GO:0005737/GO:0016020/GO:0005886/GO:0042995/GO:0005515/GO:0030054/GO:0045202/GO:0030426/GO:0070062/GO:0005938/GO:0032587/GO:0032420/GO:0007266/GO:0008360/GO:0043005/GO:0007165/GO:0031982/GO:0008283/GO:0010458/GO:0005070/GO:0070358/GO:0007173/GO:0048365/GO:0030832/GO:0016601/GO:0035023/GO:0036336/GO:0051764/GO:1900029/GO:0008344/GO:0031532/GO:…	molecular_function/biological_process/cellular_component/	F5H2B8/F5H1B5/F5H0R8/A0A2R8YE63//F5H714/A0A2R8Y4W2/F5GYM8/F5H3Q6/H0YFG1
ENSG00000180488	1	-1.07383	1.07383	-0.588973	0.588973	0.5251	0.000489469	ENSG00000180488	mitoguardin 1 [Source:HGNC Symbol;Acc:HGNC:24741]	MIGA1		GO:0016020/GO:0016021/GO:0005739/GO:0042803/GO:0005741/GO:0008053/GO:0005887/GO:0005515/GO:0046982	cellular_component/molecular_function/biological_process	A0A2R8YE40/F8W7S1//A0A2R8YDC7/A0A2R8YFQ8/A0A2R8YGK2/A0A2R8YF99
ENSG00000164039	1	-1.07365	1.07365	-0.589294	0.589294	0.442291	1.7857e-05	ENSG00000164039	3-hydroxybutyrate dehydrogenase 2 [Source:HGNC Symbol;Acc:HGNC:32389]	BDH2		GO:0005737/GO:0005829/GO:0016491/GO:0055114/GO:0070062/GO:0030855/GO:0055072/GO:0046951/GO:0003858/GO:0016628/GO:0051287/GO:0006635/GO:0019290/GO:0042168//GO:0008667	cellular_component/molecular_function/biological_process/	D6R9U8/D6RIR6/A0A024RDG9/D6RBF6/D6RFG2
ENSG00000174599	1	-1.07352	1.07352	-0.589538	0.589538	2.28108	7.28842944928042e-18	ENSG00000174599	translocation associated membrane protein 1 like 1 [Source:HGNC Symbol;Acc:HGNC:28371]	TRAM1L1		GO:0016020/GO:0016021/GO:0015031/GO:0005783/GO:0005789/GO:0006616/GO:0005791	cellular_component/biological_process
ENSG00000111752	1	-1.07251	1.07251	-0.591373	0.591373	1.28872	1.81803023714747e-28	ENSG00000111752	polyhomeotic homolog 1 [Source:HGNC Symbol;Acc:HGNC:3182]	PHC1		/GO:0005634/GO:0008270/GO:0046872/GO:0003677/GO:0005515/GO:0007275/GO:0005654/GO:0031519/GO:0035102/GO:0070317/GO:0016574	/cellular_component/molecular_function/biological_process	H0YGZ1/F5H6F5/H0YGK7//F5H6P9/F5H6F9/F5H0T9/J3KQH6/H0YH74/F5GZP4
ENSG00000110422	1	-1.07219	1.07219	0.591955	-0.591955	0.532816	2.47128e-05	ENSG00000110422	homeodomain interacting protein kinase 3 [Source:HGNC Symbol;Acc:HGNC:4915]	HIPK3		GO:0005634/GO:0005737/GO:0000166/GO:0004672/GO:0004674/GO:0005524/GO:0006468/GO:0005829/GO:0016740/GO:0016301/GO:0016310/GO:0016604/GO:0006915/GO:0043066/GO:0018107/GO:0018105/GO:0009299/GO:0043508/GO:0016605/	cellular_component/molecular_function/biological_process/	E9PKD7/
ENSG00000038295	1	-1.07156	1.07156	-0.593099	0.593098	3.34304	7.57100747127764e-29	ENSG00000038295	tolloid like 1 [Source:HGNC Symbol;Acc:HGNC:11843]	TLL1		GO:0008270/GO:0046872/GO:0016787/GO:0005509/GO:0008233/GO:0006508/GO:0005576/GO:0007275/GO:0004222/GO:0008237/GO:0030154/GO:0004252/GO:0001501/GO:0022617/GO:0016020/GO:0016021	molecular_function/biological_process/cellular_component	D6RAK5/D6RCE0//E9PD25/D6RBI6
ENSG00000090861	1	-1.0715	1.0715	0.593198	-0.593198	0.488686	5.22982e-06	ENSG00000090861	alanyl-tRNA synthetase [Source:HGNC Symbol;Acc:HGNC:20]	AARS	00970+6.1.1.7	GO:0003676/GO:0003723/GO:0005737/GO:0016020/GO:0006412/GO:0046872/GO:0000166/GO:0005524/GO:0005829/GO:0008270/GO:0016874/GO:0004812/GO:0000049/GO:0106074/GO:0043039/GO:0070062/GO:0004813/GO:0006419/GO:0002161/GO:0006418/GO:0016597/GO:0008033/GO:0043524/GO:0002196/GO:0006400/GO:0021680/GO:0050885/GO:0050905/GO:0140018	molecular_function/cellular_component/biological_process	H3BPK7/
ENSG00000127314	1	-1.07139	1.07139	-0.593409	0.593409	0.605913	1.90756717740185e-10	ENSG00000127314	RAP1B member of RAS oncogene family [Source:HGNC Symbol;Acc:HGNC:9857]	RAP1B		GO:0005622/GO:0005737/GO:0016020/GO:0000166/GO:0007165/GO:0003924/GO:0005525/GO:0005829/GO:0005886/GO:0005515/GO:0030054/GO:0007264/GO:0008283/GO:0009743/GO:0032486/GO:0035690/GO:0045955/GO:0070374/GO:0071407/GO:0097211/GO:2000301/GO:2000114/GO:0070062/GO:0043312/GO:0035722/GO:0019003/GO:0044877/GO:0061028/GO:0071320/GO:0035577/GO:0005911/GO:0005811/GO:1901888/	cellular_component/molecular_function/biological_process/	A0A024RB87/F5H077//F5GZG1/F5H823/F5H4H0/F5GYB5/F5GYH7/B7ZB78/F5H0S2/F5H7Y6/F5H500/F5H004/F5GWU8/F5H0B7/F5H6R7/F8WBC0/F5GX62/F5H491/E7ESV4	path:hsa04972/path:hsa04014/path:hsa04670/path:hsa04010/path:hsa04611/path:hsa04720/path:hsa05211/path:hsa04024/path:hsa04062/path:hsa04934/path:hsa04510/path:hsa04015/path:hsa04722	hsa:5908	ko:K07836	Pancreatic secretion - Homo sapiens (human)/Ras signaling pathway - Homo sapiens (human)/Leukocyte transendothelial migration - Homo sapiens (human)/MAPK signaling pathway - Homo sapiens (human)/Platelet activation - Homo sapiens (human)/Long-term potentiation - Homo sapiens (human)/Renal cell carcinoma - Homo sapiens (human)/cAMP signaling pathway - Homo sapiens (human)/Chemokine signaling pathw…
ENSG00000251349	1	-1.07125	1.07125	-0.593645	0.593645	1.03973	6.2297981308112e-7	ENSG00000251349	MSANTD3-TMEFF1 readthrough [Source:HGNC Symbol;Acc:HGNC:38838]	MSANTD3-TMEFF1		GO:0016020/GO:0016021	cellular_component	A0A0A6YYJ0
ENSG00000153404	1	-1.07072	1.07072	-0.594607	0.594608	1.50525	1.16622318159849e-20	ENSG00000153404	pleckstrin homology and RhoGEF domain containing G4B [Source:HGNC Symbol;Acc:HGNC:29399]	PLEKHG4B		GO:0005089/GO:0035023//GO:0005515	molecular_function/biological_process/	A0A1B0GW72/Q96HN1/
ENSG00000114315	1	-1.07026	1.07028	-0.595423	0.595405	0.614714	5.14807871742295e-14	ENSG00000114315	hes family bHLH transcription factor 1 [Source:HGNC Symbol;Acc:HGNC:5192]	HES1		GO:0008284/GO:0045944/GO:0060412/GO:0003151/GO:0005634/GO:0046983/GO:0006355/GO:0003677/GO:0003700/GO:0042803/GO:0005515/GO:0043565/GO:0000977/GO:0030154/GO:0001078/GO:0007219/GO:0000981/GO:0008134/GO:0000122/GO:0005654/GO:0003714/GO:1990837/GO:0050767/GO:0001756/GO:0007399/GO:0045892/GO:0097150/GO:0048844/GO:0065003/GO:0042826/GO:0042531/GO:0043388/GO:2000737/GO:0046425/GO:0046427/GO:0048711/GO:…	biological_process/cellular_component/molecular_function
ENSG00000065675	1	-1.06976	1.06974	-0.596349	0.59637	0.547195	0.000863984	ENSG00000065675	protein kinase C theta [Source:HGNC Symbol;Acc:HGNC:9410]	PRKCQ	04070+2.7.11.13	GO:0005737/GO:0016020/GO:0046872/GO:0000166/GO:0004672/GO:0004674/GO:0005524/GO:0006468/GO:0016740/GO:0016301/GO:0016310/GO:0035556/GO:0005886/GO:0005515/GO:0006355/GO:0016235/GO:0004697/GO:0005815/GO:0006954/GO:0002376/GO:0038095/GO:0050852/GO:0018105/GO:0005829/GO:0050870/GO:0001558/GO:0032753/GO:0051092/GO:0030168/GO:0007411/GO:0060326/GO:0006509/GO:0045652/GO:0032212/GO:0051973/GO:1904355/GO:…	cellular_component/molecular_function/biological_process	/A0A087X0I9
ENSG00000105819	1	-1.06956	1.06956	-0.596688	0.596688	0.439313	2.4387249520109e-11	ENSG00000105819	peptidase mitochondrial processing beta subunit [Source:HGNC Symbol;Acc:HGNC:9119]	PMPCB		GO:0046872/GO:0016787/GO:0005739/GO:0003824/GO:0008233/GO:0006508/GO:0004222/GO:0008237/GO:0005759/GO:0006122/GO:0009060/GO:0005750/GO:0006627/GO:0017087/GO:0005743/GO:0004175/GO:0006851/	molecular_function/cellular_component/biological_process/	F8WEC8/F8WEA6/F8WAZ6/G3V0E4/F8WBE1/
ENSG00000117114	1	-1.06895	1.06895	0.597786	-0.597786	1.84599	8.42806279881713e-10	ENSG00000117114	adhesion G protein-coupled receptor L2 [Source:HGNC Symbol;Acc:HGNC:18582]	ADGRL2		GO:0016020/GO:0016021/GO:0004930/GO:0007186/GO:0030246/GO:0007165/GO:0004888/GO:0007166/GO:0005622/GO:0043005/GO:0005887/GO:0007189/GO:0007420/GO:0016524	cellular_component/molecular_function/biological_process	H0Y3V3/B1ALU3/B1ALU1//H0Y5C0
ENSG00000166839	1	-1.06891	1.06891	0.597864	-0.597863	0.925083	2.49199e-05	ENSG00000166839	ankyrin repeat and death domain containing 1A [Source:HGNC Symbol;Acc:HGNC:28002]	ANKDD1A		GO:0007165/	biological_process/	Q8TAJ8/A0A0C4DGA8//A0A0C4DFZ5/A0A0C4DGZ7/D6RD28
ENSG00000124357	1	-1.06838	1.06835	-0.598814	0.598846	0.335632	0.000995651	ENSG00000124357	N-acetylglucosamine kinase [Source:HGNC Symbol;Acc:HGNC:17174]	NAGK		GO:0000166/GO:0005524/GO:0016740/GO:0016301/GO:0016310/GO:0005515/GO:0046835/GO:0005829/GO:0070062/GO:0006048/GO:0006044/GO:0019262/GO:0045127/GO:0006051/	molecular_function/biological_process/cellular_component/	H0YE82//H0YF44/C9JMR7/E9PPU6/H7C286/H7C1L7/H0YEB7/H7C3G9/C9JEV6/H0YC94
ENSG00000109189	1	-1.06808	1.06806	-0.599342	0.599361	0.621132	1.40831e-06	ENSG00000109189	ubiquitin specific peptidase 46 [Source:HGNC Symbol;Acc:HGNC:20075]	USP46		GO:0046872/GO:0016579/GO:0016787/GO:0005515/GO:0008233/GO:0008234/GO:0006508/GO:0006511/GO:0036459/GO:0004843/GO:0004197/GO:0032228/GO:0007610/GO:0101005/GO:0001662/GO:0008343/GO:0048149/GO:0060013/GO:0099149/GO:0045202/GO:0098978/	molecular_function/biological_process/cellular_component/	D6R9Z4/D6RIX7/H7BZK6/
[truncated: 2,526 more rows]
