# Supplementary material for: IGF2 Mediates Resistance to Isoform-Selective-Inhibitors of the PI3K in HPV Positive Head and Neck Cancer
Source: Cancers (Basel). 2021 May 7;13(9):2250. doi: 10.3390/cancers13092250 (PMC8125641; doi:10.3390/cancers13092250)
Supplement: Supplementary file 1 [file cancers-13-02250-s001.zip › table S2.xlsx]

## Sheet: Sheet1
PI3K inhibitor	Combined with	Reference
GSK2636771	Pembrolizumab	NCT03131908
	Paclitaxel	NCT02615730
GDC0032	Enzalutamide	NCT02457910
	Fulvestrant	NCT02340221
BYL719	Fulvestrant	NCT04524000, NCT03386162, NCT03439046, NCT02437318, NCT04300790, NCT04300790, NCT03056755
	Letrazol	NCT03056755
	Trastuzumab + Pertuzumab	NCT04208178
	Nab-paclitaxel	NCT04216472, NCT04251533, NCT02379247
	LEE011 + Letrozole	NCT01872260
AZD8186	Paclitaxel	NCT04001569
